# Supplementary material
Source: publisher site journal article supplement (https://www.degruyterbrill.com/publication/isbn/9783110463927/downloadAsset/9783110463927_Interviews.zip)
Supplement: Supplementary file 1 [file I1.pdf › Interviews/I1.pdf]

**I1-1#Interviewer: Wie würden sie ihre EDV–philologische Erfahrung beschreiben?**

Befragte/r: Relativ hoch. Ich arbeite ja schon seit Mitte der 90er Jahre in dem Gebiet Digital Humanities. Von daher bin ich schon relativ affin diesen Themen gegenüber. **I: Wie ist genau ihre Fachbezeichnung? Was machen Sie konkret?** B: Fachbezeichnung? Also ich würde mich schon als Digital Humanist, oder so, bezeichnen, oder Humanities Computing-Forscher, -Experte, wie auch immer. Also ich arbeite mit Methoden, erforsche Methoden zur insbesondere digitalen Bearbeitung von Texten – also viel mit Textarten, Text-Markup, erstelle digitale Editionen, gucke mir Algorithmen an, die da hilfreich sind, um Texte besser verstehen zu können und solche Sachen.

**I1-2#I: Was war ihr Gesamteindruck vom TextGrid-Lab?** B: Ich hatte das ja ganz kurz schon gesagt in dem – ach, das wurde nicht aufgezeichnet – in der Feedback-Runde. Insgesamt war es eine sehr schöne Veranstaltung. Wobei ich mir inhaltlich einen anderen Schwerpunkt gewünscht hätte, der mehr Richtung, Richtung der Möglichkeiten geht, in Richtung der Möglichkeiten zielt, die über einen reinen XML–Editor hinausgehen. XML–Editoren gibt es halt einige. Eigentlich schon ganz schön viele, um genau zu sein. Nur, das TextGrid bietet insbesondere den Zugriff auf die Recherchemöglichkeiten, inbegriffen dieses Repository, eben ganz andere Möglichkeiten. Die hätte ich mir in dem Workshop mehr in Vordergrund gewünscht, als Bearbeitung oder Kodieren eines Goethedichts. Darin sehe ich nicht die Stärke von TextGrid und auch dem TextGrid-Lab. Das sehe ich woanders. Auf diese Stärken hätte ich eher den Schwerpunkt drauf gesetzt.

**I1-3#I: Welche Funktionen sind denn neu für sie? Wenn sie so versiert sind auf dem Gebiet, gab es etwas was neu für sie war?**

B: Ja, in dem Editor selber nicht. Gut, was da neu ist, ist natürlich, oder etwas anders ist als in anderen XML-Editoren, ist, dass einfach die Benutzerführung sehr viel stringenter ist. Man hat weniger Auswahl, aber die braucht man für diese Arbeit eben auch nicht. Also weniger Optionen. Man kommt mit drei Klicks eigentlich dann doch relativ schnell zur eigentlichen Arbeit. Muss sich wenig Gedanken machen über Eingeben von Schemata und solche Sachen, weil das, was man da braucht, zumindest für die Aufgabenstellung, die hier in dem Workshop gegeben war. Das war einfach da. Also man kommt schon relativ stringent dann auf die eigentliche Nutzung. Ein XML-Editor, das sind Allgemeingültigkeiten. Und für eine große Vielzahl von Anwendungen, wurde das schon, denke ich, auf die Aufgaben hin zugeschnitten.

**I1-4#Neu?** Im Moment dann halt: Das ist kein „Stand alone“-Produkt. Das ist mit anderen

Anwendungen verknüpft. Was ich eben wirklich stark finde ist, dass man auf diese Repositories zugreifen kann. Ja, eben auf andere Daten zugreifen kann und die dann eben sofort in seiner Arbeitsumgebung dann auch drin hat, ohne dass man sich darum kümmern muss, wo die beispielsweise herkommen.

**I1-5#I: Welche Funktionen fehlen ihnen noch im Lab? In dieser Forschungsumgebung wie sie jetzt existiert?** B: Versionierung halte ich für ganz wichtig. Gerade vor dem Hintergrund, dass man ja zusammenarbeiten soll, auch in virtuellen Teams zusammenarbeiten soll. Da scheint es mir ganz wichtig zu sein, dass man Versionierung anbietet. Dass man Versionen wieder herstellen kann, alte Versionen wieder herstellen kann, Versionen untereinander vergleichen kann, dass man einfach sehen kann, wer, wann, was an solchen Dokumenten gearbeitet hat. Ansonsten habe ich mir über die Frage noch keine Gedanken gemacht. Also, muss ich drüber nachdenken...

**I1-6#I: Was halten sie von der Individualisierbarkeit im Lab?** B: Im Sinne von Konfiguration? **I: Genau. Also die Forschungsumgebung den eigenen Aufgaben anpassen oder den eigenen Vorlieben bei der Bearbeitung eines Projekts anpassen, also verschiedene perspectives und views sich erstellen zu können und ...** B: Ich habe das nicht ausprobiert. Ich kenne die Eclipseplattform, weil ich selber auch programmiere. Von daher schätze ich das, dass man sich für die Aufgaben entsprechende Dinge zusammenstellen kann. Man hat in einem Projekt dann verschiedene Phasen. In der einen, wo man mehr kodiert. In der anderen, wo man sich um die Visualisierung kümmert. Und da ist es natürlich schön, wenn das dann doch wirklich so funktioniert, wie bei einer Programmierumgebung. Dass man für die Aufgaben die Sachen dann entsprechend zusammenstellen kann. Wenn man die Sachen in der Vordergrund hebt oder einfach nur in den Hintergrund stellt. Wenn das so funktioniert, ich habe das, wie gesagt, nicht ausprobiert. Aber wenn das so funktioniert, wenn das grundsätzlich geht, dann ist das eine super Sache – und wichtig.

**I1-7#I: An welchen Stellen bzw. bei welchen Funktionen hatten sie Probleme?** B: Ach, ich hatte vielfach Probleme damit, Dateien zu speichern. Das funktionierte einfach nicht richtig. Von der Benutzerführung hatte ich wenig Probleme, auch wenn mir teilweise der... Da war eigentlich ganz klar die Verknüpfung eines Dokumentes mit dem dahinterliegenden Schema – ich weiß nicht – da war noch der Wurm drin an einer Stelle, glaube ich. Und dann war es schwierig, wenn nicht sogar unmöglich, eigentlich das Ganze wieder zurückzugehen, also den Fehler zu korrigieren. Und das einzige was dann einfiel, war, die Datei zu löschen oder sich auszuloggen

und wieder einzuloggen. Aber da war dann eben die Arbeit weg, die man vorher gemacht hatte. Das ist natürlich sehr ärgerlich und...

**I1-8#I: Wie finden sie die Navigation beziehungsweise Organisation im Lab insgesamt? Menüführung? Oder Stichwort: mehrere Navigationsmöglichkeiten, die zum selben Ziel führen können?** B: Das ist OK. Das hat funktioniert. Was ich nicht ausprobiert habe und was interessant wäre noch mal zu ergründen, ist: Wie funktioniert die Zusammenarbeit mit anderen? Also wenn man dann wirklich mehrere Leute in dem Projektteam hat. Wie funktioniert da die Zusammenarbeit? Es gab offensichtlich Probleme, wenn zwei Leute versucht haben gleichzeitig auf ein Dokument zuzugreifen. Das hat nicht so ganz hingehauen. Aber gut, das ist jetzt eine technische Sache. Das ist vom Workflow eigentlich: Wie wird das abgebildet? Beispielsweise wie erkenne ich, wenn ich jetzt das Lab öffne und sehe: Jetzt in meinem Projekt hat jemand was geändert und ich muss da jetzt weiterarbeiten – solche Sachen. Wie erkenne ich das eigentlich? Vom Arbeitsablauf her? Da weiß ich nicht, ob es da Funktionalität gibt. Auf jeden Fall habe ich es nicht ausprobiert und nicht gesehen.

**I1-9#I: Was würden sie allgemein zur Bedienbarkeit und Erlernbarkeit des Lab sagen? Aus ihrer Sicht?** B: Die Aussage kann ich nicht verallgemeinern. Aus meiner Sicht ist es bedienbar und in relativ kurzer Zeit erlernbar. Aber ich kenne Eclipse als Plattform und ich bin relativ zugänglich zu solchen Werkzeugen. Die Frage ist dann eher: Wie gehen Leute damit um, die... **I: ... weniger versiert sind?** B: Ja, weniger versiert würde ich nicht sagen, aber weniger Erfahrung damit haben, oder das noch nicht so häufig benutzt haben – solche Tools. Ja, wie geht jetzt da jemand, jemand, der bislang immer herkömmlich analog ediert und jetzt eigentlich in diese Welt geführt werden soll und diese Werkzeuge nutzen soll, wie ist für den die Lernkurve? Die scheint mir hoch. Steil. Das ist sozusagen meine Vermutung. Die kann ich jetzt nicht begründen. Also aus meiner Sicht vertretbar.

**I1-10#I: Wie fanden sie die Darstellung der Rechercheergebnisse im Lab?** B: Die war übersichtlich. Das was ich in Erinnerung habe – die Suchmaske. Ja? Die Suchfunktion? **I: Ja und auch die Ergebnisse, die beispielsweise der Wörterbuchservice liefert.** B: Das hing ein bisschen... **I: Das was zurückkommt, wenn sie recherchieren mit den verschiedenen Tools.** B: Ja. Also diese Trefferliste, die man da auf der Suchfunktion hat, die dann rechts in diesem linierten Papier erschien. Die war sehr übersichtlich. Wenn man dann hereingeklickt hat, dann hing es sehr stark davon ab, wie das ganze System gerade konfiguriert war. Also wenn dieses Fenster unten quer lag, war es gut lesbar. Wenn es rechts platziert war und dann nur so einen

schmalen Streifen war, dann war es eigentlich schwer benutzbar. Und da ist es dann immer sehr schwierig, dann die Informationen auch wirklich zu finden. Weil man sieht sie nicht auf einen Blick, weil man vielleicht ganz nach rechts scrollen muss, weil es eben dann in der rechten Spalte ist. Gerade das, was man sucht. Und ja, da ist es dann schwierig sich zurechtzufinden, weil man das nicht weiß. **I: Ja.** B: Aber man kann natürlich dann sich die Fenster entsprechend groß oder klein ziehen. Wie man es braucht. Man muss sich daran gewöhnen. Dann passt das schon. Ansonsten von der Integration der Suche, Rechercheergebnisse. Na ja. Da kann man noch darüber nachdenken, ob man das noch enger verzahnen kann. Ein Beispiel war... Zum Beispiel die Suche in dem... Gerade die Lemmatisierung, oder so was. Ich muss ja dann... Das Ergebnis des Lemmatisierers muss ich ja dann markieren und herüberkopieren. Ob man das nicht über den Service auch irgendwie auch anders anbieten kann, wenn man das Attribut erst erstellt, in das Attribut reinklickt mit der rechten Maustaste und dann sagt: „Importiere Ergebnis von Lemmatisierung“, oder so was. Das wäre natürlich viel komfortabler. Ganz so copy und paste. So für den ersten Schritt ist das schon sehr hilfreich.

**I1-11#I: Gut. Jetzt weg von dem konkreten Lab, das heute getestet worden ist, hin zur digitalen Infrastruktur. Stichwort: eHumanities. Wenn man diese digitale Infrastruktur als Vernetzung von Inhalten auf der einen Seite sowie auch von Arbeitsprozessen ansieht. Das ist ja eine mögliche Sichtweise. Diese beiden Perspektiven würde ich gerne genauer beleuchten, beziehungsweise sie darüber befragen. Welches Potential sehen sie in der Vernetzung von Arbeitsprozessen, wie sie hier jetzt angestrebt wird?** B: Ein sehr hohes, ein sehr hoher... aus verschiedenen Gründen. Einfach weil Projekte auch sehr sehr komplex werden und nicht mehr wie herkömmlich durch einen einzelnen stellenweise machbar sind. Also die Geisteswissenschaften tun sich da ja immer noch ein bisschen schwer damit, zusammenzuarbeiten in Teams. Und das ist natürlich dann..., also einerseits ist es ein Trend. In die Richtung geht es. Und größere Forschungsprojekte sind einfach nun mal nur so machbar. Und zum zweiten ist es natürlich einfach für die Ergebnisse sehr viel besser. Also es gibt davon bessere Ergebnisse, wenn man mal zusammenarbeitet. Jetzt habe ich den Faden verloren. Kann ich die Frage nochmal hören...? **I: Ja. Welches Potential sehen sie in der Vernetzung von Arbeitsprozessen?** B: Ein anderes... Die virtuelle Zusammenarbeit wird durch so was erleichtert. Und Leute die an verschiedenen Orten sitzen, wenn die eine Oberfläche haben, über die sie kommunizieren können, mit der insbesondere auch ihre Arbeitsergebnisse austauschen können. Und wenn die dann auf einer gemeinsamen Plattform arbeiten, dann ist das natürlich

sehr viel besser, als wenn die ständig irgendwelche Zeit mit Dokumenten hin- und herschicken verbringen. Das ist schon sehr schick und ich denke da wird es in Zukunft auch hingehen. **I: Welche konkreten Möglichkeiten, also Kollaborations- und Kommunikationsmöglichkeiten würden sie als nützlich ansehen, die es dann noch zur Verfügung zu stellen gäbe?** B: Na ja, die gemeinsame Arbeit an Dokumenten, dass ist denke ich schon das Entscheidende. Aber auch in einer Weise, dass man sehen kann, wer hat wann was gemacht an den Sachen, etwas irgendwann verändert. Was ich nicht so wichtig sehe, sind so andere Sachen, wie dass man darüber E-Mails schreiben kann oder chatten kann. **I: Social-Anwendungen.** B: Ja, das geht ja dann Richtung weiter so Video-Konferenz, oder so was kann man sich ja da vorstellen. Sehe ich aber nicht so mit der hohen Priorität. Da gibt es einfach auch andere Sachen. Vielleicht kann man dann eine clevere Schnittstelle oder so finden. Das sehe ich nicht oben an erster Stelle. Aber, aber, dass die Zusammenarbeit funktioniert, dass sie durch einen guten Workflow gesteuert ist, und dass es klar definierte Rollen gibt, das ist ja umgesetzt. Dass beispielweise Arbeitsergebnisse freigegeben werden von einem Projektleiter und solche Geschichten halte ich für wichtig. **I: Für wie reif halten sie die Möglichkeiten zur Kollaboration, die es im Lab jetzt schon gibt?** B: Nicht reif. **I: Welche haben sie denn gesehen bei dem Test?** B: Na ja, ich hatte halt versucht eine Kollegin bei dem Test zuzuschalten in mein Projekt als Beobachter. Also mit der Rolle Beobachter. Und sie konnte dann in der Tat meine Dokumente sehen, auch öffnen, auch bearbeiten. Also da gab es erstmal keinen Schutz davor, das zu bearbeiten. Allerdings wurden die Sachen auch nicht gespeichert. Das ist ja ok. Das stand ihrer Rolle ja auch nicht zu, dass sie das speichert. Da ist dann die Hilfestellung... Da ist die Steuerung noch nicht so ganz ausgereift, wie ich finde. Weil da muss dann einfach ein bisschen mehr noch Hilfestellung gegeben werden, dem Benutzer, dass klar sichtbar ist: Dieses Dokument wird nur lesbar geöffnet, oder wie auch immer. Und da sollte man auch ein bisschen mit arbeiten können. Dann müssen die Fehlermeldungen einfach, die dann kommen, die müssen klar lesbar sein. Da kommen dann irgendwelche maschinellen Ausgaben raus. Das ist nicht so schick. Weiterhin produziert das dann allerdings bei mir Fehler, obwohl sie ja überhaupt nichts daran ändern konnte, an meinen Dokumenten. Ich habe diese Änderungen und das, was sie gemacht hat, auch nicht gesehen bei mir. Das wurde auch nicht abgespeichert. Trotzdem konnte ich dann plötzlich nicht mehr speichern. Und dann hat sich an meiner Konfiguration irgendwas geändert. Also wir haben das nicht rekonstruieren können. Jedenfalls das funktionierte noch nicht. Dann vermisste ich die Versionierung. Das hatte ich ja schon gesagt. Das halte ich für eigentlich elementar. Vorher sollte

man Kollaboration nicht wirklich forcieren, bevor nicht das läuft. Und Workflows müssen irgendwie konfigurierbar sein. Und es muss klar gesteuert sein: Wer macht eigentlich wann, was? In diesem ganzen Prozess. Und das muss transparent sein.

**I1-12#I: Zur Vernetzung von Inhalten. Welches Potential sehen sie da? Beispiel: Wörterbuchnetz, Wortnetze, Ontologien, die geschaffen werden können von der Anbieterseite her. Welche Potentiale sehen sie da?** B: Da sehe ich auch viele Potentiale. Ich bin jetzt kein Sprachwissenschaftler. Deswegen mag ich diese Wörterbuchanwendung nicht so sehr schätzen, würdigen viel mehr. Aber ich denke schon, dass das sehr wichtig ist. Und dass dann auch, mal abgesehen von Wörterbüchern, auch Zugriff auf andere Texte, die da drin gespeichert sind, in diesem Repository. Dass da sehr hohes Potential drinsteckt. Und dass man das dann wirklich hinter einer Arbeitsoberfläche dann hat. Das setzt natürlich voraus, dass viele viele Leute, viele viele Texte da reinstellen. **I: Genau. Das wäre ja dann praktisch die andere Seite. Das wäre dann nicht das Angebot eines Wortnetzes von Seiten des Systembetreibers, würde ich es mal nennen, sondern von denen, die es benutzen.** B: Ja. Genau.

**I1-13#I: Diese ganzen Verknüpfungen, diese Netzwerkstrukturen, die sind ja rein theoretisch abbildbar, also sichtbar zu machen für den Nutzer. Sehen sie da einen möglichen Mehrwert drin?** B: Das habe ich nicht verstanden. **I: Ja, wenn sie diese Wortnetze haben und auch Verknüpfungen, die durch den Nutzer geschaffen werden, die zu visualisieren. Könnte da ein Mehrwert daraus entstehen, wenn Nutzer sich praktisch anschauen können: Wie ist die Struktur dieser Vernetzung?** B: Ich habe das nicht vor Augen. Ich weiß nicht, wie das funktioniert? Ist das so wie bei dem Wortschatz von der Uni Leipzig? Was da im Internet ist? Wo so Wortfamilien quasi gebildet werden? **I: Ja. Nach Klasse im Prinzip.** B: Genau. Ja. **I: Also das sind Visualisierungstechniken. Und...** B: Kann ich mir vorstellen. Nicht nur für Wörter, sondern auch allgemein für Informationen, Daten allgemein. Ich habe aber nie damit gearbeitet. Also ich kann mir vorstellen, dass da so ein Potential drinsteckt und dann denken wir ja gleich so in die Richtung semantische... Semantic-Web, oder so was, wo immer ein hohes Potential versprochen wird, aber nie jemand was richtig realisiert hat bislang. Und das wird besser, je mehr Daten zur Verfügung stehen. Denke ich. Man muss sich das dann mal angucken. **I: Ist also ihrer Meinung nach auch wieder davon abhängig, wie groß die Community ist und wie groß dieser Input aus dieser Community ist?** B: Absolut ja.

**I1-14#I: Genau. Sie denken auch, es ist mehr davon abhängig, als davon was der Anbieter einspeist.** B: Wer ist denn der Anbieter? **I: Ja, wenn wir sagen, es wird ein Wörterbuchnetz**

zur Verfügung gestellt, dann gibt es ja jemanden, der das anbietet. Der die Inhalte dort einspeist. Das wird natürlich auch später von den Nutzern noch erweitert beziehungsweise... B: Ok. Das mag sein. Da kenne ich mich nicht aus mit den Wörterbüchern, aber ich sage mal so: Daten allgemein. **I: Grundsätzlich ist das ja ein Service, der angeboten wird von jemandem. Also in dem Fall Wörterbuchnetz, wird ja über Trier aus zum Beispiel...** B: Ok. Ok. Ja. Dann habe ich das falsch verstanden. Na gut. In dem Fall muss das natürlich schon von dem Anbieter gemacht werden. Nein, ich dachte jetzt ehrlich gesagt, es geht eher darum, dass die Daten, quasi alle Daten, die in dem Grid vorliegen, dass die untereinander verknüpft werden, dass man da nach gewissen Kriterien sich so Visualisierungen erstellen kann. **I: Die sollen natürlich dann eingebunden werden. Sowohl von Anbieterseite, als auch von Nutzerseite. Insofern. Klar. Die Verbindung zwischen allen Daten im Grid. Gut. Das war der perspektivische Teil.**

**I1-15#Jetzt zum Abschluss. Was sehen sie am Lab als Fortschritt im Vergleich zu anderen EDV-philologischen Systemen?** B: Zum Beispiel? **I: Zum Beispiel für andere EDV-philologische Systeme?** TUSTEP. B: Ok. **I: Ich glaube da kennen sie wahrscheinlich mehr als ich.** B: Also ob ich da so viele kenne? Ich glaube, das hatte ich schon mal gesagt: Also die, also der Rückgriff auf das, was an Daten in so einem Repositorium eben drin ist, das sehe ich als Stärke. Das Thema der Kollaboration, wenn das gut funktioniert, würde ich als Stärke sehen, die hoffentliche Unabhängigkeit von Datenformaten, die Einbeziehung von Standards wie TEI, Plattformunabhängigkeit. Ein bisschen als Schwäche sehe ich, dass es wohl noch wirklich nicht die Möglichkeit gibt, auch offline zu arbeiten und dann die Daten zu synchronisieren mit dem Server. Da würde ich Wert drauf legen, dass man auch offline richtig arbeiten kann. Diese quasi, wenn man, was weiß ich, eine Zugreise macht, oder so, sich vorher einen aktuellen Datensatz holt, dann arbeitet und am Schluss dann wieder zurückspielen kann. Kostenlos ist natürlich ein Vorteil. Dass es eine aktuelle Entwicklung ist, man muss keine Altlasten mit sich rumschleppen. Das ist sicherlich von Vorteil. Die Erweiterbarkeit. Die Modularisierung und der Möglichkeit neue Tools da einzubinden. Das ist schon sehr schick. Ja.

**I1-16#I: Eines hatte ich noch vergessen die optischen Gestaltung des Lab. Wie finden sie die?** B: Es ist sehr sachlich, nüchtern gestaltet. Das finde ich grundsätzlich positiv. Am Layout kann man, glaube ich, schon noch ein bisschen machen. Da ist manchmal die Darstellung nicht so ganz, da verschwindet irgendwie was, ist nicht mehr sichtbar, was das Fenster dann da macht. Aber grundsätzlich ist das ok.
