# Supplementary material
Source: publisher site journal article supplement (https://www.degruyterbrill.com/publication/isbn/9783110463927/downloadAsset/9783110463927_Interviews.zip)
Supplement: Supplementary file 2 [file I10.pdf › Interviews/I10.pdf]

**I10-1#Interviewer: Wie würden sie ihre EDV-philologische Erfahrung beschreiben, ihre bisherigen Aktivitäten auf dem Gebiet und ...?** Befragte/r: Na also es ist so, dass ich ja als

[Anonymisierung: Berater/in] für den EDV-Einsatz in den Geisteswissenschaften arbeite. Schon jetzt seit ganz vielen Jahren, also seit 13 Jahren etwa. Und deshalb würde ich schon sagen, dass ich mich auf dem Gebiet so ganz gut auskenne. Natürlich gibt es auch schon Bereiche, in denen ich mich nicht gut auskenne, aber speziell dieser Bereich XML für die Lexikographie und für Editionen, denke ich, da kenne ich mich ganz gut aus. **I: Was haben sie konkret gemacht dann, in den vielen Jahren in dieser Tätigkeit?** B: Es gibt... Also das eine Gebiet ist Lexikographie. Da arbeite ich am M Wörterbuch. Da wird also ein neues Wörterbuch zum M ausgearbeitet und zwar vollständig mit elektronischen Ressourcen. Das heißt, da gibt es ein großes Textarchiv und verschiedene Werkzeuge, die die Belege erheben aus den Texten und die es dann ermöglichen die so umzuformen, dass daraus Wörterbuchartikel werden. Das ist der eine Bereich. Und der andere Bereich, das sind zwei Editionsprojekte und zwar zwei Briefeditionsprojekte, die ich mit der Universität Z durchführe. Das eine ist der Briefwechsel von C. Das ist ein ganz umfangreiches Schrifttum. Wird gedruckt publiziert. Und der Briefwechsel von E, berühmter S Staatsmann, vorletztes Jahrhundert. Das wird digital und gedruckt publiziert.

**I10-2#I: Ja. Vor diesem Hintergrund, der relativ großen Erfahrung auf dem Gebiet, ist es natürlich besonders interessant, zu erfahren, wie der Gesamteindruck vom TextGridLab war, jetzt bei dem Workshop.** B: Also. Ich finde die Grundidee gut. Vor allen Dingen hat mich überzeugt, die Möglichkeiten des kollaborativen Arbeitens. Weil in allen Projekten – eigentlich war es immer ein großes Problem, also die ich betreut habe, war es in allen Projekten ein großes Problem, die Leute zusammen am gleichen Material arbeiten zu lassen. Also ganz besonders natürlich mit den Projekten, die jetzt in S sind, ist das ein großes Thema. Ich sitze hier. Jemand anderes sitzt in W, in Z und so. Also das kollaborative Arbeiten ist da ein großes Thema. Und speziell bei den beiden Projekten ist es noch nicht so richtig gut gelöst. Ein bisschen anders ist das in diesem lexikographischen Projekt. Da haben wir ein Redaktionssystem für kollaboratives Arbeiten gebaut. Also unter dem Aspekt hat mir das TextGrid sehr gut gefallen – also die Möglichkeiten zusammen zu arbeiten. Was jetzt aber die eigentlichen Werkzeuge angeht... Also wenn ich mir jetzt vorstelle, ich hätte jetzt so einen Brief von E oder von C und ich sollte ihn jetzt mit dem XML-Editor, der da drin steckte, bearbeiten. Da wären mir einfach zu wenige Werkzeuge, zu wenig Hilfestellung wäre mir da vorhanden. Da würde mir noch was fehlen. Aber das ist auch mehrfach gesagt worden, dass

das eben am Anfang erst steht und dass das vielleicht noch kommen kann. Aber jetzt im Moment wäre es mir so für die konkrete Arbeit noch zu wenig Funktionalität.

**I10-3#I: Ja. Funktionalität wäre also ein Kritikpunkt. Allein die Gestaltung – spielt die auch eine Rolle, optische Gestaltung? Was finden sie daran gut? Was schlecht?** B: Ja. Also das ist ja absolutes Eclipse - Look & Feel. Also wer sich mit Eclipse auskennt, der findet sich da eigentlich auch in das, in dem TextGrid-Lab auch sofort zurecht, finde ich. Ich persönlich mag gerne dieses Eclipse-Gefühl, deshalb hat mir das gut gefallen, gut strukturiert. Aber ich würde jetzt eben schon festhalten wollen, dass es mir auch in dem Workshop auch ein bisschen zu kurz gekommen ist. Das ist eben Eclipse-Philosophie. Das ist nicht TextGrid-Lab-Philosophie, sondern das ergibt sich aus diesem Framework, in dem man sich da bewegt. Das hat mir gut gefallen. Aber ist eben keine Spezialität von TextGrid denke ich. **I: Wenn wir bei der optischen Gestaltung sind, dann wird wahrscheinlich das ähnlich auch auf die Navigation und Organisation zutreffen, weil die ja auch ziemlich stark eclipsebasiert ist. Trotzdem: Würden sie dazu noch was Genaues sagen? Also... Ist die Menüführung verständlich, logisch? Was halten sie davon, dass mehrere Navigationsmöglichkeiten mit demselben Ziel... Beispielsweise bietet das... Gibt es ja, dass man auf verschiedenen Wegen zum selben Ziel kommen kann darin. Was halten sie davon?** B: Also das finde ich immer gut. Wenn es viele Wege gibt, die zum Ziel führen oder zum selben Ziel. Finde ich an sich ganz gut. Ich weiß nicht, ob das jetzt in dem Bereich schon reinspielt? Was ich nicht gut fand, war die Fehlerbehandlung. Also es gab ja oft unabgefangene Fehler. Also wenn man irgendetwas falsch gemacht hat, dann wusste man jetzt nicht genau: Ist das jetzt ein Anwendungsfehler? Also es wurde jetzt keine benutzerverständliche Fehlermeldung geworfen. Oder ist das einfach noch nicht programmiert? Wenn z.B. gar nichts passiert ist. Oder gibt es da einen Fehler in der Programmierung? Das hat einen dann so ein bisschen verunsichert. Dass man nicht genau wusste: Anwenderfehler, Programmierfehler oder was überhaupt für ein Fehler? Das ist bestimmt eine Kinderkrankheit und lässt sich bestimmt in den Griff kriegen. Nur jetzt im Moment war es für mich dann halt manchmal ein bisschen verwirrend. Das ist der eine Punkt zur Benutzerführung. Und was vielleicht noch ein Kritikpunkt wäre: Also ich verstehe gut, dass das TextGrid Wert darauf legen muss, einheitliche Metadaten zu haben. Dass man also am Anfang, wenn man so eine Sammlung anlegt, dass man sorgfältig seine Metadaten hinschreiben muss. Finde ich eigentlich gut. Jetzt ist nur speziell für die Projekte, mit denen ich das zu tun habe, so, dass die alle im TEI-Header schon irgendwo die Metadaten drinstehen haben. Und die hätte... Ich schreibe die natürlich ungerne doppelt. Also ich hatte jetzt meine eigenen Daten dabei. Dann habe ich in den Daten

geguckt: Was habe ich da eigentlich geschrieben an Metadaten? Und dann habe ich die mit Copy & Paste in dieses TextGrid-Ding reingestellt. Und das fand ich irgendwie so ein bisschen unpraktisch. Da hätte ich mir jetzt gedacht, dass ich die irgendwie miteinander in Beziehung setzen kann und sage: Jetzt mach es automatisch. So etwas in der Richtung. Das hat mich... Dass ich das doppelt machen musste, hat mich ein bisschen gestört. Aber ansonsten: Navigation und so, fand ich ok. Also hat mir nicht negativ gefallen. Und ich finde: das ist gut, wenn Navigation nicht negativ auffällt.

**I10-4#I: Die Darstellung von Rechercheergebnissen wäre ja beispielsweise auch so ein Ziel von Navigation letztlich..., wie fanden sie die? Also sowohl von dem Wörterbuchnetz als auch von der allgemeinen Recherchemaske. Haben sie damit ein bisschen rumprobiert? Wenn ja?** B: Also mit dem Wörterbuchnetz habe ich rumprobiert, mit der Recherchemaske im Lab leider nicht. Das ist irgendwie an mir vorübergegangen im Seminar. Das habe ich irgendwie nicht richtig, ist mir nicht richtig vor Augen getreten. Mit dem Wörterbuchnetz natürlich schon. Naja, das fand ich jetzt so mittelprächtigt, weil: Natürlich ist die Darstellung ... Man kriegt ja praktisch die HTML-Darstellung des Wörterbuchnetzes. Die ist natürlich in so einem richtigen großen Browserfenster irgendwie prickelnder. Also man sieht mehr. Man sieht mehr Text. Man sieht mehr Zusammenhang und so. Das fand ich jetzt vielleicht etwas sehr verknüpft. Aber das ist natürlich, liegt natürlich in der Natur der Sache so ein bisschen. Da hätte ich jetzt auch keinen Verbesserungsvorschlag.

**I10-5#I: Wenn sie sich mit Eclipse auskennen, dann wirkt sich das sehr wahrscheinlich darauf aus, wie gut sie das erlernbar finden. Weil, wenn sie mit Eclipse gearbeitet haben, dann wird sich ja vieles erschließen, was jetzt einem Nutzer, der sich mit Eclipse nicht auskennt, wahrscheinlich schwerer fallen würde. Aber trotzdem aus ihrer Sicht.... Es kommt ja noch ein bisschen was dazu, zu der Eclipse-Oberfläche. Wie finden sie die Erlernbarkeit?** B: Ja. Also, ich muss sagen, ich finde es eigentlich ganz gut. Ich habe allerdings... Es war ja auch ein Kollege von mir aus W da, der L, mit dem wir... mit dem ich zusammen an dem C-Projekt arbeite. Und ich habe ihn dann so ein bisschen beobachtet. Und da habe ich natürlich schon gesehen, dass es ihm weitaus schwerer gefallen ist, wenn man halt nicht... also nicht Eclipse verwendet. Ich verwende das für alle meine Programmierprojekte auch. Dann stellt sich, stellen sich mir manche Fragen einfach gar nicht. Wie man das sich jetzt gestaltet, und so. Ich habe mich natürlich auch mit Fotis Jannidis ein bisschen unterhalten und er sagt, dass die eigentliche Hauptstoßrichtung ist, dem unbedarften Editionsphilologen ein Werkzeug an die Hand zu geben. Und da frage ich mich natürlich schon, ob es dazu nicht zu kompliziert zu lernen ist. Aber jetzt speziell für mich muss ich

sagen: ich fand es klasse. Aber es ist halt die Frage, wen man vor Augen hat. Man muss halt jemanden vor Augen haben, der sich mit dieser ganzen Eclipse-Philosophie ein bisschen auskennt. Und auch mit dem Handling von verschiedenen Plugins. Also wie man Module zusammenstöpseln kann. Was Perspektiven und Views sind und so. Das würde man voraussetzen. Wenn man aber sagt, man will ein ganz einfaches Werkzeug bauen für denjenigen, der sich eigentlich nicht gut mit Technik auskennt, dafür ist es dann vielleicht ein bisschen viel. **I: Heißt das, dass sie es gut finden würden, wenn man beispielsweise bei einem weiteren solchen Workshop eher mal so die Eclipse-Basics zunächst unterrichten würde? Praktisch? Also, dass man sich besser auskennt mit Views und Perspectives und dem Basisumgang dieser Plattform?** B: Ja, finde ich schon – genau so. Also ich finde, in dem Seminar hätte für die Klientel, die so anwesend war, etwas deutlicher rauskommen können: Was ist Eclipse? Und was leistet das TextGrid-Lab jetzt an besonderer Funktionalität? Was kann ich da einstöpseln? Das ist vielleicht ein bisschen zu kurz gekommen in dem konkreten Seminar, in dem ich da war. **I: Und an welchen Stellen – ich komme jetzt absichtlich da noch mal darauf zurück – an welchen Stellen hatten sie als dann [Anonymisierung: User/in] mit recht hohen Voraussetzungen Probleme? Also, mit welchen Werkzeugen hatten sie am meisten Probleme?** B: Ja, also am meisten Probleme haben mir die Fehlermeldungen bereitet. Sage ich ganz ehrlich.

I10-6#Also es gab ja gelegentlich mal, z. B. unter verschiedenen Umständen, gab es Schwierigkeiten beim Speichern. Also, ich gebe auch zu, das war natürlich vielleicht ein bisschen viel verlangt. Ich hatte meine eigenen Daten dabei. Dann habe ich als erstes einmal versucht, meine Daten, die allerdings nicht TEI-konform waren, da einzulesen. Das ging schon. Aber dann konnte ich sie nicht speichern. Dann irgendwie ist es dann doch gegangen. Und dann wieder nicht. Also das hat mich irgendwie verunsichert. Und das hat mich eigentlich den ganzen Tag über verunsichert, dass ich nie so genau wusste: Kann ich das jetzt speichern oder nicht?

I10-7#Dann hatte ich Schwierigkeiten... Also in unserem Projekt verwenden wir ganz viel XSLT-Transformationen. Und dass ich die nicht anwenden konnte.... Ich weiß nicht, ob es an mir gelegen hat. Ich wollte auch nicht so viel fragen, weil ich ja Anwenderin einer anderen Gruppe war. Ich wollte die anderen da nicht ausbremsen. Meine Spezialfragen habe ich nicht gefragt, aber hatte den Eindruck, dass ich Transformationen nicht hätte anwenden können. Ich habe zumindest keine Möglichkeit gefunden, keine Engine, mit der ich das hätte machen können. Das hat mich auch gestört, weil wir das für viele verschiedene Zwecke in diesen beiden Editionen brauchen – die Texte halt umzuformen. Zum Beispiel um ein Register zu

machen, oben den Apparat rauszuziehen und solche Sachen. Das machen wir alles da mit XSLT. Dass ich das nicht machen konnte... Da hatte ich auch Schwierigkeiten, weil ich gedacht habe, das muss es irgendwo geben. Und dann habe ich ganz lange gesucht. Und dann habe ich irgendwann gedacht: Ach nein. Und diese Fehlermeldungen, die nicht abgefangen werden. Das finde ich auch schwierig, weil ich eben nicht wusste: Liegt es jetzt an mir oder an den Umständen?

**I10-8#I: Ok. Was halten sie von der Projektverwaltung. Das war ja zunächst einmal der erste Schritt, der auch besonders wichtig ist am Anfang um reinzukommen.** B: Vielleicht habe ich da nicht genügend ausprobiert. Das kann sein. Aber es ist z.B. so: In diesem C-Projekt, da arbeiten wir mit Subversion, als Versionsmanagement zwischen den verschiedenen bearbeiteten Zuständen. Also jedes Mal, wenn jemand einen Brief weiterbearbeitet, wird das ausgecheckt und hinterher wieder eingchecked in Subversion. Ich vermute, dass das TextGrid-Lab so was in dieser Art, also Versionsverwaltung auch hinkriegt. Das habe ich aber entweder nicht richtig gesehen, oder es ist nicht richtig geschildert worden. Ich weiß es nicht genau, was jetzt da vorlag. **I: Also Versionierung praktisch. Wer hat was, wann...** B: Also ich hab dann, wir haben versucht... Ich hatte ja eben unsere Daten dabei und ich hab dann dem L auch Rechte gegeben, darauf weiterzuarbeiten. Und wir haben dann damit ein bisschen rumgespielt, zusammen daran zu arbeiten. Da gab es aber so komische Seiteneffekte. Also z.B. konnten wir dann beide gleichzeitig die gleiche Datei öffnen. Und dann konnte aber nur noch einer wieder speichern. Und die des anderen, das... Also das sieht man ja bestimmt in unserem Videomitschnitt, was wir da gemacht haben. Das war irgendwie verwirrend dann, als wir dann beide gleichzeitig versucht haben, daran zu arbeiten und das hat auch eine Weile gedauert bis wir das hingebraht haben. Dass wir beide gleichzeitig dasselbe Korpus sehen konnten und daran arbeiten konnten. Und auch irgendwie nur so mit Trick 17, was Stefan Büdenbender uns dann verraten hatte, so. Nochmal starten und so. Dann war das ein bisschen durch die Brust ins Auge.

**I10-9#I: Ok. Gab es denn irgendwelche Funktionen, die neu für sie waren?** B: Also, neu für editionsphilologische Zwecke? Oder in welcher Beziehung neu? **I: Neue Tools. Oder, ja ...** B: Ja. Also... **I: Neue Funktionen, die sie bei anderen Programmen bisher noch nicht hatten.** B: Also ich muss sagen, was alles genannt worden ist, was noch gemacht werden soll in dem TextGrid-Lab, da war einiges dabei, das ich sehr vielversprechend fand. Also der Kollationierer natürlich, Registerprogramm und solche, also Tokenizer und solche Dinge. Aber in dem Seminar selbst, und ich habe mich ja so ziemlich danach gehalten, was Stefan gesagt hat, was wir tun sollen. Das habe ich versucht nachzumachen mit meinen eigenen

Daten. Aber ich habe jetzt nicht unbedingt versucht, da jetzt neue Tools zu finden. Und mir schienen da auch nicht viele weiterführende Tools zu sein. Außer dem Editor und der Wörterbuchverknüpfungsmöglichkeit. Also springen und suchen im Wörterbuchnetz. Ich habe dann noch ausprobiert: historische Lemmatisierung. Also Wörterbuch und Lemmatisierung würde ich jetzt mal zusammenfassen. Historische Lemmatisierung, weil das natürlich für mich interessant ist. Aber da gab es ja noch kein Ergebnis. Da waren noch Platzhalter drin. Und das waren eigentlich die drei Tools, die ich ausprobiert habe. Und so viel mehr Tools hab ich da jetzt gar nicht gefunden. Und – also speziell in den Projekten, in denen ich so beteiligt bin, da brauchen wir eben ganz viel Register machen oder Apparat rausziehen, kommentieren von Stellen. Das sind so... Das wären jetzt so meine Basics. Die habe ich da jetzt nicht so gefunden. Also ich würde sagen, es war mehr so mein Eindruck: Da fehlt noch ein bisschen was, als dass ich da jetzt was Neues gefunden hätte. **I: Ja, Gibt es noch mehr was ihnen an Funktionen gefehlt hätte? Also jetzt mal abgesehen von denen, die sie von daher schon sich denken können, als das sie geplant sind, oder dass sie sie von anderswoher kennen? Was hat ihnen genau gefehlt. Hätten sie da eine Idee?** B: Also die, die ich jetzt genannt habe: Register und Kommentar und Transformationen ablaufen lassen können – also eine XSLT-Engine. Das wären die, die mir am dringlichsten gefehlt haben.

I10-10#Aber, das sollte ich dazu noch sagen, ... Was ich mir jetzt wünschen würde, oder was ich vielleicht tun würde, wäre erst einmal diese Basicfehler zu beseitigen. Also so was wie... Ich würde jetzt keine neuen Funktionen... Also wenn ich es machen würde. Ich würde keinen neuen Funktionen in Angriff nehmen. Weil so was wie..., dass ich irgendwas manchmal nicht speichern konnte. Das ist so ein elementares Ding. Das wird jeden sofort verunsichern, der das erste Mal versucht, da was zu speichern. Wenn das nicht geht, dann traut man sich halt nicht mehr. Und andere von diesen kleinen Fehlern, die halt da an allen Ecken und Enden auch aufgetreten sind. Ich würde erst einmal versuchen, die zu beheben, bevor ich dann mit den weiterführenden Funktionen weitermachen würde. Das ist...also würde ich vielleicht so machen.

I10-11#Und ... natürlich, ich habe meinen Lieblings-XML-Editor. Also ich arbeite gerne mit dem Oxygen – auch als Eclipse-Plugin. Und eigentlich würde ich halt gerne den nehmen für meine tägliche Arbeit. Und der hat ja schon alles mit dabei. Die ganzen Engines und das alles, deshalb ist so der XML-Editor, der jetzt eingebaut war ins Lab, jetzt gar nicht so mein Favorit, sondern halt so weiterführende Programme eben, Register speziell, verschiedene Registertypen oder Versionsvergleich und so was in der Richtung, das wäre halt so eher das,

was mich interessieren würde. **I: Ja. Sie wären also stärker für Individualisierbarkeit und Modularisierbarkeit in dem Sinne, dass man eher mehr Schnittstellen zur Verfügung hat uns selber sich was zusammen kann?** B: Würde ich schon sagen. Ja. Aber ist vielleicht spezielle Sichtweise von mir. Also, ... **I: Ja. Ja, aber...** B: Ja, ich wollte es nur sagen, dass ich mir vorstellen kann, dass man das auch ganz anders sehen kann als ich das sehe.

**I10-12#I: Gut. Dann würde ich jetzt gerne die Perspektive wechseln, weg vom konkreten TextGrid-Lab, wie es im Moment besteht, hin zu eHumanities allgemein. TextGrid soll ja eine digitale Infrastruktur in den Geisteswissenschaften bieten, wird als eHumanities-Projekt gehandelt. Welche Bedeutung messen sie diesem Begriff eHumanities oder dieser Richtung eHumanities generell bei?** B: Ja also, ich finde es eine ganz tolle Sache, eine Riesenchance, große Herausforderung. Also allerhöchste Priorität und allerhöchste Bedeutung würde ich der Sache beimessen, wenn die Visionen, die man hat, also dass man sozusagen alle Geisteswissenschaftler, sagen wir mal in Deutschland oder gar in Europa, sozusagen in einen Pool hineinarbeiten und es in diesem Pool aber wohldefinierte Schnittstellen gibt, dass die Werkzeuge und die Daten irgendwie miteinander reden können, also dass es da Schnittstellen gibt, dass die Werkzeuge ihre Ergebnisse aneinander übergeben können und auch, dass Daten teilbar sind. Das finde ich wirklich eine traumhafte Idee und fände ich unbedingt unterstützenswert – mit allen Mitteln, die man so hat. Also das würde ich auch für die Projekte, in denen ich beteiligt bin, sofort mitmachen und unterstützen, also allergrößte Bedeutung.

**I10-13#I: Bei... Sie vertreten ja die Position – Schnittstellen, also möglichst Modularisierbarkeit. Wenn da so viel zusammengefügt wird, besteht da nicht die Gefahr, dass man den Überblick verliert?** B: Ja, doch, glaube ich schon, dass da die Gefahr besteht und gerade da sehe ich die große Herausforderung, dass..., aus dieser Flut an Information trotzdem noch den Weg zu bahnen. Und darin würde ich eben meine Aufgabe von so einer zentralen Clearing-Stelle, oder wie auch immer man das benennen will, ich weiß nicht, ob Clearing-Stelle gleich das richtige Wort ist, aber aus so einer zentralen Institution sehen, dass es wohlgeordnet ist, dass die Werkzeuge und die Daten über Verschlagwortung und Metadaten usw. so gut organisiert sind, dass ich das Werkzeug und den Datenbestand finde, den ich brauche. Dass ich eben nicht selbst mühsam googlen muss und gucken muss: Wie kriege ich jetzt aus dem Bedürfnis, was ich habe, das richtige raus? Sondern, dass mir das da, schön wie in einer wohlgeordneten Bibliothek sozusagen, angeboten wird. Also das fände ich schon... Das fände ich die Herausforderung – in der Tat. Ich finde auch, dass das Risiko besteht, dass man dann nachher ungeordnet disparaten Wust da vor sich hat. Aber das, finde

ich, ist die Aufgabe, das zu ordnen. **I: Haben sie Ideen zur Lösung dieser Aufgabe?** B: Oh, je... **I: Wenn sie sagen: große Herausforderung. Also wie kann man dem Herr werden?** B: Keine Ahnung, ehrlich. Ich bin jetzt auch keine Metadatenpezialistin, muss ich sagen. Aber es müsste wohl irgendwie über so was wie eine Ontologie, oder so was, funktionieren. Ich kenne mich da jetzt nicht wirklich gut aus, aber das wäre so meine Vermutung, dass man sozusagen aus dem Weltall kommt bis hin zur kleinsten Laus, das irgendwie sich strukturieren kann, dass man das findet. **I: Also eher ontologiebasiert.** B: Da kennen sich vielleicht Bibliothekare auch etwas besser aus, als ich mich da auskenne. Aber... sozusagen einen vorgebahnten Weg, dass ich irgendwelche Wege beschreiten kann, die mir schon jemand vorgeräumt hat, sozusagen, dass ich mich da durchfinde. Aber eine Lösung, einen Lösungsansatz hätte ich nicht dafür, nein.

**I10-14#I: Man kann ja unterscheiden in dieser Zusammenführung in dieser digitalen Infrastruktur nach sowohl miteinander verknüpften Inhalten als auch Arbeitsprozessen – also im Sinne von Tools oder Zusammenarbeit über diese Infrastruktur, also das jetzt mal grob aufgeteilt in vernetzte Inhalte und vernetzte Arbeitsprozesse. Ja, welche Kollaborationsmöglichkeiten würden sie da als nützlich ansehen? Vor allem. Also wenn man jetzt mal den Bereich vernetzte Arbeitsprozesse herausgreift.** B: Na also an Werkzeugen bin ich natürlich sehr interessiert. Deshalb wäre das auch, finde ich, ein interessanter Punkt. Und da glaube ich, ist die Herausforderung das: Wenn ich jetzt ein Werkzeug baue, z.B. sagen wir mal, ich habe eine Transformation gemacht, die aus diesen C-Briefen alle Personennamen und alle Ortsnamen rausfischt. Ja? Wenn ich jetzt dieses Werkzeug gemacht habe, dann funktioniert das mit meinen Daten da ganz prima. Also ich bin ganz glücklich damit, wie das mit den Daten funktioniert. Das wird aber natürlich mit... Das funktioniert schon für die E-Daten nicht so, weil da die Gegebenheiten anders sind. Und der Trick bei solchen Werkzeugen, die ich teile mit anderen, müssten eben die sein, dass ich die so parametrieren kann, dass möglichst auch andere Leute mit ihren Daten da zurechtkommen damit. Und das finde ich sehr schwierig. Aber auf der anderen Seite eben ein zentrales Merkmal. Also die Werkzeuge, die da stehen, die müssen für mich auf meine Daten anpassbar sein. Also ich darf da nicht erst in die Tiefen der Programmierung reingucken müssen, damit ich sagen kann: Meine Personennamen sind aber nicht „name ist gleich“ sowieso getagt, sondern die sind halt vielleicht anders irgendwie getagt. Also das müsste irgendwie parametrierbar sein. Und das fände ich eine zentrale Eigenschaft der Werkzeuge, die da zur Verfügung gestellt werden müssten, dass ich die für mich passend machen kann in überschaubarem Aufwand. Sonst fange ich lieber selbst von vorne an, also mache lieber



meine eigenen Sachen. **I: Ja, also nicht unbedingt neues Werkzeug, das man preferiert, nur anschließen können, sondern auch Werkzeuge, die einem gefallen, anpassen können an die eigenen Arbeitstechniken.** B: Finde ich ganz wichtig, weil, eigentlich ist es ja so... – vielleicht auch die Quintessenz, die man jetzt aus den vielen Projekten, die z. B. hier in T auch sind, ziehen kann – dass doch auch man, wenn das alles Wörterbücher sind z.B., jedes Wörterbuch hat seine besonderen individuellen Stärken und Schwächen und irgendwie so eine Besonderheit, der man auch gerne besonders Rechnung tragen würde. Und da muss man halt doch immer wieder irgendwie an den Programmen etwas ändern und etwas Spezielles tun. Das ist einfach...Das liegt einfach in der Natur der Sache. Und wenn ich irgendwo ein Werkzeug finde, was schon 90% kann, von dem ich will. Und wo ich dann aber ein paar Schraubchen drehen kann, um die restlichen 10% noch irgendwie für mich hinzukriegen. Dann wäre ich glücklich. Aber wenn ich natürlich ein Werkzeug finde, was vielleicht nur 50% kann, aber immerhin schon mal 50% kann, aber ich krieg den Rest damit nicht hingewurschtelt, dann denke ich mir: Ok, dann eben nicht. Dann fang ich eben lieber wieder von Null an und habe dann doch mein Werkzeug, mit dem ich 100% zurechtkomme. Deshalb. Also Anpassbarkeit der Werkzeuge und Konfigurierbarkeit auf individuelle Bedürfnisse finde ich wichtig – unbedingt.

**I10-15#I: Gut. Dann zu dem anderen Punkt: Vernetzung von Inhalten. Wo sehen sie da die größten Potentiale?** B: Im Allgemeinen gesprochen sehe ich die überall da, wo diese Verknüpfung nicht automatisch geschieht, sondern mit philologischem Durchblick – also z.B. was diese Wörterbuchverknüpfungen angeht. Die Wörterbücher sind ja im Wörterbuchnetz schon miteinander verknüpft und am meisten Gewinn ziehe ich an den Stellen, wo ich weiß, die Verknüpfung ist im Hinblick auf irgendetwas zustandegekommen – also im Hinblick darauf, das sind jetzt etymologisch verwandte Wörter. Oder es ist ein Synonymverweis. Oder es ist ein Oberbegriff-Unterbegriff-Verweis. Also irgendwie, dass ich weiß: Was erwartet mich denn am Zielpunkt? Wenn es aber z.B. einfach diese transitiven Verweise sind, dann ist das für manche Zwecke interessant und lustig. Aber ich weiß ja nie: was erwartet mich jetzt am Ende meiner Reise. Also ich werde da halt so hingeschickt und ich weiß aber nicht: Warum werde ich jetzt dahin geschickt ans Ziel? Und ich finde es immer gut, wenn ich sozusagen vorher schon weiß: Aha, jetzt kommt ein Synonymverweis und so. Also wenn das sozusagen mit philologischem Verstand irgendwie gemacht ist. **I: Ja, also, wenn man sich das vorstellt: Sie hätten dann ein Wort in diesem Wörterbuchnetz und sie würden gerne die Verknüpfungen zu anderen antizipieren können, also in dem Sinne, wo die hinführen. Oder wie? Oder die Art der Verknüpfung?** B: Nein, nicht wo die hinführen,

sondern warum die da hinführen. Also wenn ich jetzt zum Beispiel.... Jetzt müsste ich mal wissen... Also dieses berühmte Himbeere-Beispiel, was im Wörterbuchnetz... Da ist ja... Da sind ja die... Das Obst ist ja ziemlich erforscht da. Wenn ich jetzt, sagen wir mal von der Himbeere, wie ich da zu den ganzen Dialektausdrücken für Himbeere geführt werde. Das denke ich mir dann doch: Wenn es da einen Verweis in das Pfälzische Wörterbuch gibt, zu dem entsprechenden Wort, dann denke ich mir noch: Aha. Jetzt habe ich ein Mundartwort dafür. Aber wenn ich jetzt dafür auf einmal dafür, sagen wir mal zu Kernobst... Ich phantasie. Ja? Wenn ich jetzt zu Kernobst im Grimmschen Wörterbuch geführt werde, dann wüsste ich gerne: Das ist jetzt eigentlich ein Verweis, der auf einen Oberbegriff, einen ontologischen Oberbegriff führt. Himbeere ist kein Kernobst, aber Beerenobst. So. Also dann wüsste ich gerne: Das ist jetzt ein Verweis nicht in Dialektwörterbüchern, sondern es ist, führt zum Oberbegriff. **I: Ah, ja. Also die...** B: Die semantische Relation würde mich da zum Beispiel interessieren. **I: Ja. Also die Art des Verweises müsste spezifiziert werden. Also wenn man es als Knoten und Kanten sieht, hätten sie gerne eine Bezeichnung für die Kante.** B: Genau. **I: Ok. Ja, wir sprechen dann jetzt von semantischen Netzen und von der Art der Verknüpfung, die unter den einzelnen Einheiten besteht. Gut, was halten sie davon, das als solches in einer Gesamtansicht zu zeigen? Also, wenn sie sagen, sie hätten gerne die Verbindung spezifiziert, dann müssten sie schon eine, praktisch eine Draufsicht haben, von ihrem Punkt an dem sie sind, hin zu möglichen Zielpunkten und Spezifizierung der Verbindung dahin. Also...** B: Also das ist ja zum Beispiel beim DWDS. Da kriegt man das ja so visualisiert. Die Beziehung eines Wortes zu Partnern. Und dann kann man ja sogar so verschiedene Ausweitungsstufen... also nur die Hauptpartner oder auch erweiterte Partner sehen. Das ist glaube ich bei DBDS so. Bei dem IDS-Korpus kann man auch so eine graphische Ansicht sehen. Und mit diesem Wortschatz Leipzig glaube ich auch. Und das finde ich eigentlich ganz witzig und hilft auch oft, sich das irgendwie so ein Wortfeld vor Auge zu führen. Aber manchmal hilft es eben auch gar nicht. Manchmal verwirrt es einen halt nur. **I: Kann auch verfälschen.** B: Ja, genau. Also ich fänd es schon nett, so was zu haben, als zusätzliche Visualisierung. Aber ich bin jetzt vielleicht auch nicht so der visuelle Typ da. Also, ich finde es nett, aber wenn ich Wichtigeres zu tun hätte, würde ich lieber Wichtigeres machen, als das so zu visualisieren.

**I10-16#I: Wir hatten das ganze ja jetzt auf Wortverknüpfungen begrenzt... Aber in TextGrid kommt es ja eigentlich schon in dem, bei dem editionswissenschaftlichen Schwerpunkt dazu, dass eigentlich Texte mit Wörterbüchern oder Wortnetzen verknüpft werden, also dass wir praktisch eine Veränderung der Einheiten haben oder**

**der Verknüpfung verschiedener Einheiten. Was ist für sie da das Potential... Was verändert sich da? Woran, worauf muss man da achten?** B: Ja, also wahrscheinlich geht jetzt meine Antwort in eine andere Richtung, als so vielleicht geplant. Es ist zum Beispiel so. Sagen wir mal C, aber auch die E-Ausgabe. Das ist natürlich, das ist ja beides Mitte 19. Jahrhundert und da werden schon natürlich gerade im S-Deutschen manchmal Begriffe verwendet, die einem modernen Leser, auch einen modernen s Leser, überhaupt nicht mehr geläufig sind. Die muss man irgendwie da erklären. Und deshalb wird in beiden Editionen im Erläuterungsapparat ziemlich häufig auf das Deutsche Wörterbuch verwiesen und gelegentlich auch auf das s Idiotikon. Aber bleiben wir mal beim Deutschen Wörterbuch. Das ist natürlich eine tolle Sache, sowohl für den Bearbeiter als auch für den Editor, der daran arbeitet. So einen Link da jetzt auch ablegen zu können. Also der muss jetzt nicht nur gucken: Was steht da? – und seinen Erläuterungstext verfassen, sondern, dass er da auch gleich seinen Link sich hinschreiben kann und so. Das wäre also für diese Ausgaben, für diese beiden Editionen wäre das eine prima Sache. Dass man die Texte zum..., zur leichteren Erschließbarkeit mit den Wörterbüchern verknüpfen kann. Allerdings, da finde ich auch wichtig, dass das eben an denjenigen Stellen ist, an denen der Editor irgendetwas für erläuterungsbedürftig hält. Also ich würde jetzt nicht grundsätzlich alle C-Briefe nehmen und gucken, jedes Wort, wenn du das im Deutschen Wörterbuch finden kannst. Mache sozusagen einen historischen Lemmatisierer und verknüpfe jedes Wort im Deutschen Wörterbuch. Dann würden die wirklichen problematischen Stellen ja irgendwie untergehen in diesem Wust der ganzen anderen, die man ja auch... **I: Weil ja alles erläutert wird.** B: Genau. Werden alle irgendwie erläutert. Das käme schon darauf an, dass man eben trotzdem noch sagen kann. Die Stellen, die jetzt wirklich Erläuterung auch bedürfen, die kriegen jetzt so einen Link in das Deutsche Wörterbuch. Und da ist von großem Gewinn auch gerade wenn man da an die elektronischen Publikationsmöglichkeiten denkt. Auch C wäre eine tolle Sache, also wenn man da elektronisch sich weiterhangeln könnte.

**I10-17#I: Gut. Was sehen sie jetzt an TextGrid als Fortschritt im Vergleich zu anderen EDV-philologischen Systemen, Angeboten, Plänen? Sie haben ja schon einen reichen Erfahrungsschatz auf dem Gebiet und von daher wäre das interessant zu wissen. Wo sehen sie einen Fortschritt? Und wo sehen sie auch noch das größte Manko an dem Ganzen?** B: Das ist jetzt natürlich eine schwierige Frage. Also... Fortschritt... Oder ich fange mal andersherum an. Ich habe natürlich, bevor diese ganze XML-Schiene aufkam, habe ich sehr viel TUSTEP verwendet. Und für mich ist TUSTEP nach wie vor absolut das größte Tool, was die meisten Werkzeuge bereitstellt. Also alles das, was wir vorhin ja eben schon

gesagt haben, was es so an Werkzeugen gibt – da gibt es schon gebahnte Wege. Also es gibt eben schon einen Kollationierer. Und es gibt ein Register-Programm. Und es gibt ein Quickprogramm. Und das alles, das gibt es schon. Das gibt es auch konfigurierbar. Das kann jeder für sich passend machen. Allerdings ist TUSTEP natürlich extrem sperrig und extrem schwer zu lernen. Also das kann man eigentlich fast keinem mehr heute anbieten, weil das eben so schwer zugänglich ist. Und jetzt sehe ich also den größten Fortschritt bei TextGrid, sehe ich einmal in der Möglichkeit eben des kollaborativen Arbeitens. Also das würde ich als das größte Prä sehen. Und in der etwas leichteren Bedienbarkeit und Zugänglichkeit. Also ich glaube schon, dass es ein großes Prä gegenüber TUSTEP zum Beispiel ist, die leichtere Zugänglichkeit. Das größte Manko ist eben die Kehrseite der Medaille. Dass im Moment viel natürlich auf Zugänglichkeit und diesen Dingen, die das Prä sind, investiert worden ist. Viel Zeit ist dafür investiert worden. Dafür gibt es eben wesentlich weniger Funktionalität noch als zum Beispiel bei TUSTEP. Wenn man das irgendwie zusammenführen könnte, diesen reichen Schatz an Funktionen mit leichter Zugänglichkeit, also dann wäre es eine ganz tolle Sache.

**I: Vielen Dank.** B: Gern geschehen. Gern geschehen.
