# Supplementary material
Source: publisher site journal article supplement (https://www.degruyterbrill.com/publication/isbn/9783110463927/downloadAsset/9783110463927_Interviews.zip)
Supplement: Supplementary file 4 [file I12.pdf › Interviews/I12.pdf]

**I12-1#I: Ja, zunächst würde ich gerne etwas über ihren Hintergrund wissen, also ihre EDV-philologische Erfahrung und Tätigkeit. Wie sieht die aus und wie würden sie die beschreiben?**

B: Ja ich bin hier im K [Anonymisierung] tätig, das heißt, ich habe jeden Tag mit solchen Fragestellungen zu tun. Es geht um das Auszeichnen – Markup – von Texten nach unterschiedlichen Kriterien. Das heißt also, ich bin seit zehn Jahren im K und habe auch vorher schon in Jobs gearbeitet, wo EDV und Philologie, zum Beispiel beim K-Index [Anonymisierung], miteinander verbunden sind.

**I: Ja. Mit welchen Erwartungen sind sie vor diesem Hintergrund zu dem TextGrid-Workshop gegangen?**

B: Ich bin in der glücklichen Lage, dass ich sozusagen die Entwicklung des TextGrid ja schon hier vor Ort mitverfolgen konnte, sodass das jetzt keine Black Box mehr für mich war, sondern ich habe schon gewisse Teile im Entstehen quasi gesehen, sodass ich schon eine ungefähre Vorstellung dessen hatte, was mich da erwarten würde. Und deswegen kann ich jetzt gar nicht sagen, welche Erwartungen ich jetzt konkret dazu gehabt habe. Ich weiß es nicht.

**I: Das heißt, sie haben das die ganze Zeit schon mitverfolgt und wahrscheinlich währenddessen auch schon Anknüpfungspunkte gefunden oder Ideen entwickelt, wie das TextGrid-Lab für ihre Arbeit von Bedeutung sein könnte?**

B: Ja. Also ich denke, da gab es sozusagen einen gegenseitigen Austausch. Vor allem mit dem B [Anonymisierung] und M [Anonymisierung], weil die ja sozusagen ihre Arbeit ja um die Wörterbücher herumgruppiert haben. Ich selber bin im K ja auch für die Wörterbuchauszeichnung tätig, sodass wir uns da zum einen, was das K an Arbeit dort hineingesteckt hat, austauschen konnten und Anregungen weitergeben, was wir im K nicht machen könnten, was aber durchaus im Rahmen von TextGrid wünschenswert wäre und wie wir es im K angegangen sind, als eine der Strategien für TextGrid, um eben dieses Problem in dem Rahmen zu lösen. So konnten wir uns, denke ich, gegenseitig etwas – wie soll ich sagen – unterstützen.

**I12-2#I: Ok. Das war ja dann aber ein ganz anderer Zugang als dieser Nutzerzugang, den sie in diesem Workshop hatten.**

B: Ja, sicher. Vor allem war das, was ich vorher gemacht habe, oder was ich gerade beschrieben habe, eben ein sehr spezielles Element. Während das, was im Workshop selber war, war ja sozusagen die ganze Breite dessen, was zur Verfügung stand. Also das waren ja eben vielmehr, weil ja auch dann sozusagen die Ergebnisse von den anderen TextGrid-Arbeitsstellen dort zu sehen waren. Und das war natürlich, im Vergleich zu dem, was ich über den B kennengelernt habe, war ein kleiner... Oder andersherum: Ihr habt nur einen

kleinen Ausschnitt von dem Gesamten gesehen. Und das, was ich da gesehen habe, war schon nach meinen Einschätzungen, eigentlich eine sehr vielversprechende Sache, wobei ich eben, weil ich auch von B und A [Anonymisierung] gewisse zusätzliche Informationen bekommen habe, was noch schon sozusagen noch in der Hinterhand gehalten worden ist. Oder andersherum fand ich es etwas schade, dass man sich nicht getraut hat, das auch schon zu präsentieren, weil – wie soll ich sagen – es zunächst einmal...

I12-3#Oder das, was für mich im Vordergrund stand, bei diesem Workshop, war der Editor. Und ich fand das wie gesa... Wenn man nur weiß, was präsentiert worden ist, aber nicht, was schon auch alles geplant worden ist, wäre es in meinen Augen ein bisschen zu wenig gewesen. Das heißt, man hat sich, glaube ich, etwas zu bescheiden gehalten, weil man doch schon auch mit dem Bildeditor da eine tolle Sache hat, die man da durchaus auch hätte vorführen können. Wie gesagt, nur das, was im Workshop vorgeführt worden ist, war ja bei weitem nicht alles, was zur Verfügung stand, aber das wirkte zunächst einmal etwas – ja, ich weiß jetzt nicht das richtige Wort – vielleicht ein bisschen zu bescheiden. Aber man hätte da schon etwas mehr Punkte sammeln können. Oder es wäre möglich gewesen, mehr Punkte zu sammeln. Weil, ein Editor an sich ist nun auch nicht so etwas, was jetzt noch heutzutage so großes Aufsehen erregt, weil es eben schon sehr viele Editoren gibt, die, weil es Spezialeditoren sind, noch mehr können. Was allerdings hier im Editor das Besondere ist, eben hier die Vernetzung mit den anderen Ressourcen, was da natürlich nicht so ohne Weiteres möglich ist. Wie gesagt, der Editor alleine ist nicht so sehr, in meinen Augen, der Bringer von dem gesamten TextGrid gewesen. Insofern hätte man sich da etwas weniger verstecken sollen, sondern auch ein bisschen mehr mit den Pfunden, die schon da sind, wuchern können und in die Offensive gehen können.

**I12-4#I: Ja. Gab es denn auch Funktionen dabei, die für sie jetzt völlig neu waren? Mit denen sie gar keinen Umgang hatten? Wo sie vielleicht eine Art Aha-Erlebnis hatten, oder oder...?** B: Muss ich jetzt kurz nachdenken. Kann ich jetzt insofern eben, weil ich schon auch mit bei der Entwicklung sozusagen dabei war, nicht mehr genau sagen. Wo ich aber eines haben werde, ist auch bei einem Modul, was noch entwickelt wird, nämlich das Vergleichsmodul, was da leider auch noch nicht vorgeführt werden konnte. Und da bin ich sehr gespannt auf die Visualisierung der Unterschiede bei Vergleichen von Texten. Also ich kenne es eben von TUSTEP. Da ist es ja etwas mühsam und gerade wenn, je nachdem, sehr komplexe Texte miteinander verglichen werden, bin ich sehr gespannt, wie da eine Visualisierung doch sehr erleichtert wird. Also insofern geht es..., kann ich zu dem, was jetzt selber in dem Workshop

präsentiert worden ist, leider nicht genau sagen, was da..., ob mich jetzt noch wirklich etwas überrascht hätte. Aber bei dem, was jetzt noch kommen wird, bin ich mir sicher, dass es noch einige Sachen gibt. Also auch was den Bildeditor angeht, wo ich schon sehnsüchtig darauf warte, dass er zur Verfügung stehen wird.

**I12-5#I: Visualisierung haben sie jetzt erwähnt und zwar im Zusammenhang mit Textvergleichen. Können sie da noch genauer darauf eingehen? Wie stellen sie sich das vor?**

B: Also dass man die Unterschiede und zwar jetzt auf Zeichen-, aber auch auf Satzebene von zwei Texten, man zum Einen auf einen Klick, auch wenn es sich um sehr komplexe Sachverhalte handelt, erkennen kann. Und dass man zum Beispiel auch die Möglichkeit haben wird, haben soll, sich Gruppen von Unterschieden anzeigen zu lassen. Also das weiß ich jetzt noch nicht genau, wie das im Moment Stand der Dinge ist, aber wenn ich den Stefan richtig verstanden habe, soll es auch im Rahmen diese Moduls ermöglicht werden, so eine Art Typologie der Unterschiede bei dem Vergleich zweier Texte herzustellen, sodass ich sagen kann: Mich interessiert nur eine bestimmte Gruppe von Unterschieden in nur der und der Visualisierung. Und das finde ich gegenüber den Programmen, die ich bisher benutze, doch eine sehr nützliche und auch arbeitserleichternde Funktion. **I: Wie soll diese Visualisierung aussehen? Ganz konkret.**

**Wie soll das bildlich dargestellt werden? Also was visualisiert werden soll, haben sie jetzt genau gesagt. Aber wie stellen sie sich das bildlich vor? Umgesetzt? Oder? Ja.** B: Es gibt, es fällt mir der Name jetzt nicht mehr ein, ein Programm, was schon mit Visualisierungen arbeitet. Aber da kann der Stefan noch mal den Namen nennen, weil mir der jetzt im Moment nicht einfällt. Aber das Programm selbst ist, was den sonstigen Leistungsumfang angeht, eher nicht so nutzerfreundlich. Und da hatte Stefan aber schon angekündigt, dass man das, was die Visualisierung angeht, sich an diesem orientieren möchte. Und das alleine würde schon, wenn man diese Funktionalitäten übernehmen würde, schon mich sehr zufriedenstellen.

**I12-6#I: Stichwort benutzerfreundlich. Wie benutzerfreundlich fanden sie das TextGrid-Lab?**

B: Insgesamt schon sehr. Das einzige, was, oder wo ich am Anfang etwas Schwierigkeiten hatte, war, wenn ich mir bestimmte Fenster etwas großgezogen habe, oder so, dass ich da etwas Aufwand hatte, um den ursprünglichen Zustand wiederherzustellen. Also wenn es irgendwie einen Knopf gäbe: "Stelle den Default-Zustand wieder her", egal was ich mit meinen Fenstern sonst gerade gemacht habe, dann wäre es perfekt in meinen Augen. Aber ansonsten finde ich die Ergometrie, vor allem dass man sich die Fenster je nach Bedarf zusammenstellen, vergrößern, verkleinern kann, sehr gut. Also das hat mir sehr gut gefallen.

**I12-7#I: Also die Individualisierbarkeit dieser Oberfläche, das finden sie gut?** B: Das ist ein sehr entscheidender Punkt. Weil, ich kann ein Werkzeug für Geisteswissenschaftler entwickeln, aber ich kann natürlich nicht sagen, dass dieses Werkzeug für alle in gleicher Weise auch funktionieren muss. Also wenn jeder sich sozusagen das Werkzeug dann noch mal nach eigenen Vorstellungen gestalten kann, dann ist das auf jeden Fall ein großes Plus. **I: Individualisierbarkeit auch in dem Sinne, dass man selber Werkzeuge anschließen kann?**

**Das gehört ja zu diesem modularen Konzept, das wir schon durch TextGrid ausgemacht haben.**

B: Ja. Ja. Das finde ich natürlich auch sehr gut und da ist, denke ich, die Eclipse-Plattform eigentlich genau das Richtige, also dass ich eben nicht nur Java-basierte Programme mal anschließen kann, sondern auch jedes andere Programm. Und für mich, der ich ja sehr viel mit TUSTEP arbeite, ist das natürlich auch ideal, weil da natürlich der Anschluss und das Hin- und Hergeben von Daten eigentlich genauso funktioniert, wie ich es mir vorstelle.

**I12-8#I: Wenn sie viel mit TUSTEP gearbeitet haben: Was sind für sie die entscheidenden Fortschritte, die jetzt durch TextGrid gegenüber TUSTEP gemacht werden können? Und was könnte sich TextGrid vielleicht bei TUSTEP noch abgucken, also eine Scheibe abschneiden davon?** B: Also zum Letzteren würde ich deswegen noch nicht so viel sagen wollen, weil TextGrid noch nicht – sozusagen – abgeschlossen ist. Vielleicht kann es ja dann doch, vor allem, wenn jetzt eine weitere Förderphase kommen sollte, noch einiges noch kommen, was so jetzt im Moment noch nicht zu sehen ist. Was TUSTEP gegenüber dem TextGrid-Lab natürlich nicht hat, ist die Möglichkeit, weltweite Ressourcen einzubinden, also nicht nur Ressourcen, was Text angeht, sondern auch eben die ganzen Services, also dass von vorneherein das TextGrid-Lab darauf angelegt ist, weltweit zu kollaborieren. Und TUSTEP ist halt eben ein Einzelplatzprogramm und hat solche Möglichkeiten natürlich nicht. Und das ist aber, denke ich, so dieser Gedanke einer weltweiten Zusammenarbeit, eigentlich das, was den Arbeitsplatz eines geisteswissenschaftlichen Forschers in den nächsten Jahren mit Sicherheit bestimmen wird. Und da sehe ich eigentlich gerade die großen Stärken von TextGrid-Lab.

**I12-9#I: Ja, da wären wir schon bei einem Aspekt, den ich eh noch erfragen wollte, und zwar: Eine Vernetzung von Arbeitsprozessen, also Kooperation international, ist die eine Seite. Und die andere Seite ist die Vernetzung von Inhalten. Also das sind ja die wesentlichen Elemente, die in einem Netzwerk zusammengefügt werden. Diese beiden würde ich jetzt gerne genauer beleuchten – und zwar waren wir jetzt gerade bei den vernetzten Arbeitsprozessen: Wo liegen da aus ihrer Sicht genau die Potentiale? Dass das**

**der Arbeitsplatz oder die Arbeitsform der Zukunft sein wird in dem geisteswissenschaftlichen Bereich oder zumindest in die Richtung geht, hatten sie erwähnt.**

**Wo sehen sie da konkret die Potentiale? Was für ein Fortschritt kann sich daraus ergeben?**

B: Ja. Ein Fortschritt liegt schon alleine darin, dass jeder, der eine ähnlich gelagerte Fragestellung hat, nicht wieder das Rad von vorne erfinden muss, sondern er kann sich informieren: Gibt es für mein Problem Lösungen, die eigentlich hundertprozentig, oder meinetwegen 80%, die würden auch schon dicke reichen, das abdecken, was ich eigentlich auch machen möchte? Und kann ich mich da ohne große Probleme einklinken? Und gibt es dann vielleicht jemanden, der die fehlenden 20% im Service, oder was auch immer gerade ansteht, noch erledigen kann? Und ja. Vor allem eben, dass das Einsparen von Ressourcen..., das heißt, also ich muss nicht für mein Problem von vorne anfangen, sehe ich einen Hauptpunkt. Und zum anderen sehe ich, wenn ich mich über die Services von TextGrid-Lab informiere, hier in dem und dem Bereich gibt es schon Lösungen. Die funktionieren gut. Und wenn ich dann ein ähnliches Problem einmal habe, dann kann ich schon mal gleich hier bei TextGrid-Lab nachsehen. Und mein Problem ist dann sozusagen keines mehr, weil es schon eine Lösung gibt. Also da sehe ich die beiden großen Vorteile bei einer solchen Zusammenarbeit.

**I12-10#I: Und ja auf der Inhaltsebene? Wo sehen sie da die großen Möglichkeiten einer Vernetzung?**

B: Dass ich sozusagen einen Zugriff auf die Daten habe, die zumindest ein Mindestmaß vereinheitlicht, also über die TEI-Guidelines, sind. Und sodass ich, wenn ich mich mit anderen Ressourcen verknüpfen oder diese abfragen möchte, davon ausgehen kann: Wenn ich mich an die TEI-Guidelines halte, dass dann der Zugriff oder das Verarbeiten dieser anderen Daten nicht mehr so aufwendig ist, also dass ich letztlich – das hat mir auch in dem Editor sehr gut gefallen – quasi per Knopfdruck einen Text mit Wörterbüchern verlinken kann. Aber ich meine, es wird ja mit Sicherheit nicht nur bei Wörterbüchern bleiben. Ich kann eben... oder dass ich theoretisch alles, was an Texten im TextGrid-Lab vorhanden ist, miteinander, sofern die Autoren eben zustimmen, verknüpfen kann. Und über die Suche, über alles das, was im TextGrid-Lab vorliegt, auch meinetwegen Quellen oder Belege für meine Fragestellung finden kann, auf die ich von alleine nicht gekommen bin. Also ich kann natürlich das auch in Google suchen. Aber der Nachteil ist dann die Menge, die ich da finde, wobei ich dann eben nicht..., oder hundertprozentig sicher sein kann, dass nur ein Bruchteil für mich überhaupt von Interesse ist. Und dadurch, dass das doch gewissen Kodierungsvorgaben unterlegen ist, das, was in TextGrid-Lab reinkommt, hat das schon einen höheren qualitative Zustand, als das, was bei

Google zu finden ist.

**I12-11#I: Diese Rechercheergebnisse, die sie dann praktisch hätten, beziehungsweise auch die Verknüpfung von Inhalten, die ist ja sehr vielfältig. Also wenn man dieses Repository hat, dann geht man ja davon aus, dass dann irgendwann große Datenmengen vorhanden sind. Sie hatten eben das Stichwort Visualisierung genannt. Diese Verknüpfungen abzubilden, hielten sie das für sinnvoll, beziehungsweise würden sie sich daraus eine Qualitätssteigerung erhoffen/erwarten?**

B: Ich meine zunächst einmal ist jede Art einer Dokumentation von Verbindung zweier Sachverhalte, also die Darstellung, dass diese beiden etwas miteinander zu tun haben, ein Vorteil – egal, ob das jetzt wirklich inhaltlich in der Art zusammenhängt, dass das ein sozusagen Folgeergebnis des Vorhergehenden ist. Aber allein, dass man da bestimmte Zusammenhänge erkennen kann, das ist auf jeden Fall in meinen Augen ein Vorteil. Und ich persönlich habe für meine Arbeit, oder meinen Arbeitsstil herausgefunden, dass ich eher solche Sachen erkennen oder verarbeiten kann, wenn sie visualisiert sind. Also wenn ich nur einen in einem Text beschriebenen Zusammenhang sehe, dann setzt sich das bei mir eher nicht so sehr fest, als wenn ich das in irgendeiner Form von Graphiken oder Abbildungen oder sonstwie wahrnehme.

**I12-12#I: Dieses Netzwerk über das wir gesprochen haben, das kann ja sehr komplex werden. Also gerade, wenn man von Grid ausgeht. Da besteht ja auch immer irgendwie die Gefahr, dass man sich in diesem Netzwerk verheddert. Dass man die Orientierung verliert.**

**Wie... Was für eine Struktur würden sie sich wünschen, um darin zurechtzukommen? Was sehen sie da als eine gute Lösung an?**

B: Angesichts der Tatsache, dass diese ganzen Techniken erst im Entstehen sind, weiß ich nicht, ob es da schon eine gute, eine Ideallösung gibt. Und ich denke, das ist, könnte auch eine der Aufgaben von TextGrid-Lab sein, verschiedene Verfahren anzubieten. Und man wird in der Praxis dann auch sehen können, welches jetzt die Beste ist. Ob es eine Beste überhaupt gibt, das weiß ich nicht. Ich meine, was in der Vergangenheit das Arbeiten mit Büchern angeht, gab es auch verschiedene Möglichkeiten, Informationen darzulegen, ob das jetzt nun am einfachsten meinetwegen in Form eines Registers ist, eines Kataloges, eine Lexikons, wie auch immer. So wie da verschiedene Möglichkeiten jeweils ihren Sinn hatten, könnte ich mir vorstellen, wird es das auch im elektronischen Medium geben. Da jetzt schon, wo wir quasi eigentlich nur in der Anfangsphase sind, schon – wie soll ich sagen – zielführende Methoden vorzugeben, weiß ich nicht... Also da würde ich lieber noch sozusagen eben diese Anfangsphase als Test- und Probierphase sehen. Und wirklich möglicherweise auch

noch neue Verfahren, von denen wir heute auch noch nichts wissen, zu entwickeln und auszuprobieren.

**I12-13#I: Eine Frage ist beim CommunityGrid immer, welchen Teil macht die Anbieterseite? Also die Systementwickler. Und welcher Teil wird nachher von der Community beigesteuert? Wie sehen sie das? Wie soll das verteilt sein? Oder wo kann man da eine Grenze ziehen?**

B: Ich denke, dass... Wesentlicher Bestandteil der Akzeptanz von TextGrid-Lab ist der Inhalt. Also ich denke, man kann die Leute, in meinen Augen, dadurch für TextGrid-Lab am ehesten begeistern, wenn sie sehen: Da sind so viele Texte drin. Und ich kann sie für meine Arbeit nutzen, heranziehen. Das sind eben nicht mehr nur Wörterbücher, sondern auch Primärtexte und so weiter. Das wäre sozusagen zunächst einmal für mich eine sinnvolle Aufteilung, dass User erstmal Content herstellen, während die Leute, die jetzt TextGrid-Lab konzipieren, programmieren dann eher erstmal nur die Infrastruktur, ich meine das...

**I: Also da gibt es ja auch Berührungspunkte. Wenn dieser Content hergestellt wird und einfach nur wild in dieses Repository irgendwo rein... Oder finden sie, dass da einfach nur diese Projektstruktur, wie sie jetzt in der Verwaltung da ist, zunächst ausreicht?**

B: Nein. Ich finde, man sollte vielleicht überlegen, dieses TextGrid, oder diesen Workshop vielleicht etwas dahingehend zu verstetigen, in gewissen Abständen mal ein Zusammentreffen sozusagen von den TextGrid-Leuten mit den potentiellen Usern gestaltet, um beide Seiten zu einem Erfahrungsaustausch zusammenzubringen, sodass User eben nicht nur sagen: Wir bringen Content, sondern wir wollen für unseren Content noch gerne diese und diese Lösung. Vor allem, weil die ja mit ihren Texten arbeiten, während man von TextGrid-Seite her ja schon auch, weil viele Leute, die sozusagen auch in den Philologien arbeiten, schon auch ihre Fragestellungen heranziehen. Aber je mehr Leute dann eben TextGrid benutzen, desto mehr Fragestellungen und Probleme kommen ja auch noch dazu. Und das wäre eben im Rahmen eines solchen Workshops, denke ich, wo man sich sozusagen gegenseitig auch austauschen könnte, eine gute Lösung, wie man beide Seiten zusammenbringen könnte.

**I: Da wäre ja jetzt ein Beispiel ihr Wunsch nach einer Visualisierungsmöglichkeit zum Textvergleich. Also dass solche Anregungen von der Community-Seite auch kommen können?**

B: Ja. Wobei ich natürlich schon weiß, dass dieser Wunsch umgesetzt wird. Oder man dabei ist. Aber im Prinzip wäre so etwas schon denkbar. Ich meine, ich habe eben wie gesagt durch meinen persönlichen Kontakt zu einigen TextGrid-Leuten dann die glückliche Situation, dass ich nicht erst bis zu solchen Workshops warten muss, beziehungsweise mich per Mail oder sonstwie an die TextGrid-Leute wenden kann. Aber wenn

man sowas institutionalisieren könnte, das, denke ich, wäre auch eine schöne Sache.

**I12-14#I: Aber jetzt auf ihre Anregung zurückzukommen was Visualisierung angeht, jetzt in dem speziellen Fall, die zum Textvergleich. Können sie sich die auch in anderen Kontexten vorstellen? Wo würden sie das noch sinnvoll finden? Als wissenschaftliche Anwendung?**

B: Zum Beispiel bei Wortschatzanalysen in Texten. Also wenn ich zum Beispiel über die Worthäufigkeit feststellen möchte: Welches Thema behandelt ein Text? Das sieht man jetzt zum Beispiel auch schon des Öfteren auf diversen Internetseiten, wo bestimmte Begriffe, die auf einer Seite, egal ob durch Suche oder durch Anklicken besonders häufig angewählt wurden, dass die irgendwie in einer Begriffswolke – ich weiß jetzt den Fachterminus nicht – besonders hervorgehoben würden. Und wenn man solche Verfahren auch einfach über die Analyse eines Index verborum zu einem Text einsetzen könnte, um zu sehen, was die häufigsten Begriffe sind, sodass man die auch sozusagen... Oder was sind die häufigsten Kollokationen, also welche Begriffe werden zwei drei Paare am häufigsten benutzt. Das könnte ich mir auch in diesem Bereich vorstellen. Also was eine Visualisierung angeht. **I: Das heißt ja, sie ziehen durchaus auch in Betracht, dass dadurch neue wissenschaftliche Erkenntnisse gewonnen werden können.**

B: Also was die Visualisierung angeht, weniger dass es neue Erkenntnisse, sondern dass sie leichter, im wahrsten Sinne des Wortes, ins Auge fallen.

**I12-15#**Was neue Erkenntnisse angeht, da würde ich mir eher die..., oder das bei den Recherchemöglichkeiten vorstellen können, oder auch Vorarbeiten anderer, die zum Beispiel eben externe Quellen, die ich nicht kenne, mit ihren Texten verknüpfen. Und wenn ich über die Recherche da rangekommen bin, eben dieses auch wahrnehmen kann. Ansonsten? Ich weiß es eben nicht genau. Man müsste erstmal definieren, was neue Erkenntnisse eigentlich sind. TextGrid-Lab sehe ich im Moment, bei dem was vorliegt, nicht nur eine Umsetzung bisheriger Werkzeuge des Philologen, die auf Papier stattgefunden haben, eben in das elektronische Medium übertragen. Ich meine, das alleine ist schon einmal sehr gut zu bewerten. Aber das Neue kann erst, denke ich, auf dieser Grundlage entstehen. Was das jetzt genau werden wird? Das wird die Zeit zeigen.

**I: Also sie meinen damit neue Instrumente, die vielleicht neue wissenschaftliche Erkenntnisse bringen könnten, müssten erst auf der Basis dieser Tools, die ja eigentlich nur Umsetzung in diese elektronische Medium sind, noch entwickelt werden.**

B: Ja. Also es ist in den... Im elektronischen Medium an sich sind schon mehr Möglichkeiten gegeben, als in der bisherigen. Also ein Lexikon zum Beispiel, was bisher als Buchform erschienen ist, hatte eben das Problem, ein eklatantes Problem: Platzmangel. Da habe



ich in der Internetversion eines Lexikons natürlich keine Platzeinschränkungen. Kann allerdings dann auch den Nachteil haben, dass ich dann zu viele Informationen bekomme. Und da wäre es auch wiederum ein Abwägen, was jetzt besser ist. Eine konzentrierte sparsamere Version oder eine Überfülle an Information, die ich nicht verarbeiten kann. Und das, denke ich, da muss auch noch ein Mittelweg gefunden werden. Und dass jetzt da auch neue Verfahren, neue Zugänge entwickelt werden, das, denke ich, ist mit Sicherheit zu erwarten. Ich meine, vor zwanzig Jahren, wenn man sieht, was damals Stand der EDV-Technik war... Das ist wirklich schon Steinzeit. Und ich bin auch gespannt, was in zehn Jahren schon wieder möglich sein wird. Aber gut. Das vorherzusagen ist natürlich jetzt schwer.

**I12-16#I: Klar. Dann noch zu einem ganz konkreten Punkt am TextGrid-Lab, den ich aus den von ihnen ausgefüllten Fragebogen entnommen habe, dabei vor allem die Anregung, dass ein Menü in Deutsch hilfreich wäre. Das will ich jetzt auch nicht unerwähnt lassen. Ja. Gibt es noch andere Stellen an denen sie Probleme hatten? An denen es gehakt hatte? Wo Kritik anzubringen wäre.** B: Ja. Also ich meine wegen des Menüs auf Deutsch, das war weniger, weil ich damit Probleme, was den Umgang angeht, habe, sondern ich denke, aus ganz profanen Vermarktungsgründen sollte TextGrid sich wirklich überlegen, ein Programm, was von einem deutschen Ministerium gefördert wird, was hauptsächlich in Deutschland erstmal verbreitet sein soll, wäre gut bedient, wenn es auch eine deutsche Benutzerführung, also eine deutsches Menü hätte, um ganz allein die Akzeptanz etwas in meinen Augen zu fördern. Was sonst noch verbessert werden könnte, wäre, darüber hatte ich ja auch eingangs schon gesprochen, irgendwie so einen kleinen Default-Button, der die Ausgangssituation, was die Anordnung der Fenster und so weiter... Wenn man da mal wirklich alles ausgenutzt hat, was es an Verstellmöglichkeiten gibt, dass man das wieder möglichst schnell in einen ursprünglichen Zustand wieder zurückführen kann. **I: Ansonsten keine Stellen an denen es gehakt hat? An denen sie nicht weitergekommen sind?** B: Ja, es gab einige Stellen, wo ich allerdings nach Hinzuziehung der Onlinehilfe weitergekommen bin. Also es dürfte am Anfang in der Tat etwas helfen, sich in die Benutzerhinweise zu vertiefen. Aber ansonsten glaube ich, bin ich recht gut auch aufgrund der Beschreibung, die ausgeteilt worden ist, damit zurechtgekommen. **I: Also sie halten diese Benutzerhilfe für wichtig. Sollte die dann auch ausgebaut werden? Hat ihnen das gereicht, was da geboten war? Oder könnten sie sich da vorstellen, dass man einiges verbessert?** B: Also ich würde mich selber als nicht ganz unerfahren in diesen Dingen bezeichnen. Insofern hatte ich keine Probleme. Das fällt mir allerdings jetzt auch schwer, mich in

einen Benutzer hineinzusetzen, der solchen Dingen völlig unbewandert ist. Deswegen weiß ich nicht genau. Also für mich selber hat es gereicht. Aber wie gesagt. Ich arbeite schon einige Jahren mit solchen Werkzeugen, insofern war es für mich in Ordnung. Ja.

**I12-17#I: Gut. Vor dem Hintergrund ihrer langjährigen Erfahrung, vielleicht könnten wir zusammenfassend einfach sagen: Was sehen sie als den größten Fortschritt von TextGrid an? Und was sehen sie noch als größtes Manko?** B: Also das... Der Fortschritt von TextGrid gegenüber anderen Werkzeugen dieser Art ist eben die Möglichkeit, dass ich alles mit allem verknüpfen und verbinden kann. Also sowohl was die Texte oder auch die Programme, die Services angeht. Der – in Anführungszeichen – Nachteil ist, dass bisher nicht so viel realisiert worden ist. Also ich bin schon sehr gespannt eben auf diesen Bildeditor und das Vergleichsmodul, weil ich das auch sehr gut für meine eigenen Arbeiten brauchen kann. Aber das ist insofern kein echter Nachteil, als die Sachen ja schon quasi fast vor der Fertigstellung sind. Und es ist dann eher meine Ungeduld, die da gerne loslegen möchte, aber noch nicht kann. **I: Gut. Dann bedanke ich mich für das Interview.**
