# Supplementary material
Source: publisher site journal article supplement (https://www.degruyterbrill.com/publication/isbn/9783110463927/downloadAsset/9783110463927_Interviews.zip)
Supplement: Supplementary file 5 [file I13.pdf › Interviews/I13.pdf]

**I13-1#Interviewer:** Also zunächst würde ich gerne etwas über ihren Hintergrund wissen und würde sie deshalb bitten, zu beschreiben, inwiefern sie EDV-philologisch tätig sind, beziehungsweise EDV-unterstützt wissenschaftlich arbeiten, welche Erfahrung sie auf dem Gebiet haben? Befragte/r: Ja, ich war [Anonymisierung: Mitarbeiter/in] bei dem Projekt R und

habe in den Jahren 2001, ging das los, glaube ich, bis 2006, die R online gestellt. Ja. Anschließend war ich bei der A in M im Projekt D tätig, das die Onlinebereitstellung von weiteren Akademieprojekten begleitet hat. **I: Ja. Mit welchen EDV-Mitteln hatten sie da zu tun? Haben sie da mit XML-Editoren und Ähnlichem zu tun? Könnten sie darauf genauer eingehen?**

B: Also bei der R waren die XML-Editoren noch nicht so weit entwickelt, als dass sie für eine neues Projekt nutzbar gewesen wären. Das ist aber, glaube ich, meines Wissens heute immer noch nicht so einfach, da XML-Editoren zu finden, die die genauen Bedürfnisse der Editoren treffen. Also irgendwie ist mit einem XML-Editor alles möglich, aber die Nutzung ist eben doch etwas schwierig. Die Anforderungen der meisten Editoren sind gar nicht so umfangreich. Aber die Nutzbarkeit muss eben sehr einfach sein. Ja. Ansonsten die Onlinebereitstellung... Ansonsten wurde bei den R online alles in XML ausgezeichnet. TEI. Für die Onlinebereitstellung wurden Postgres-Datenbanken genutzt. Und für das Interface Web-PHP - also alles OpenSource. Und die Datengrundlage sind eben TEI ausgezeichnete XML-Dateien.

**I13-2#I:** Ah ja. Da wären wir auch gerade beim Thema. Verschiedene Anforderungen, was die Auszeichnung auch angeht. Da habe ich in dem Fragebogen, den sie in Trier ausgefüllt haben, eine Anmerkung von ihnen, dass sie da skeptisch sind, dass die Anforderungen für tiefe Auszeichnung in verschiedenen Projekten zu unterschiedlich sind für einen gemeinsamen Ansatz. B: Ja. **I: Da würde ich gerne genauer mit ihnen sprechen. Können sie das genauer beschreiben, wo sie da die Schwierigkeit sehen?**

B: Ja. Also ich bin ja jetzt kein Germanist. Und wir waren bei ihnen bei dem Workshop und tja... Was man da alles auszeichnen konnte oder verlinken konnte, das geht so tief in die Materie rein, dass ich nicht glaube, dass es... oder erst mal mittelfristig nicht möglich sein wird, einen gemeinsamen technischen Ansatz zur Erfüllung aller Anforderungen von allen Fachgebieten über einen Editor zu bekommen. Also TextGrid hat ja den Anspruch, für alle Geisteswissenschaften nutzbar zu sein. Aber das, was sie jetzt da entwickelt haben, das ist so spezifisch auf Wörterbücher zugeschnitten und ich könnte genauso spezifisch für historische Anforderungen erweitern. Dann bräuchten wir zehn Jahre bis wir fertigentwickelt haben. Und dann ist die Technik weggelaufen. Das ist das Problem, was ich

sehe. Also dass quasi... Wenn sie tiefe Auszeichnung für Editoren leicht nutzbar machen wollen, dann ist der Programmieraufwand so hoch und wird so lange Zeit in Anspruch nehmen, dass die technischen Anforderungen dann, wenn das Projekt möglicherweise fertig ist, schon wieder ganz andere sind. **I: Halten sie es dann für sinnvoller, einfach nur eine Schnittstelle zur Verfügung zu stellen, dass jeder sein spezifisches Tool dort anschließen kann, das für seine Forschungszwecke am besten geeignet ist?** B: Ja. Also da bin ich jetzt zu wenig Techniker, um da jetzt genauer was zu sagen zu können – mit Schnittstellen oder wie das funktionieren könnte. Mir ist es da nur aufgefallen, dass die Anforderungen der einzelnen Disziplinen..., oder dass die Erfüllung der Anforderungen der einzelnen Disziplinen in einem Werkzeug vermutlich einen sehr, sehr großen technischen und programmiertechnischen Einsatz bedeuten würde. Weil zum Beispiel als Historiker hätten sie gerne ein Register, eine Registerverwaltung für Orte, Personen, Sachregister, mehrstufig verwaltet, das man einfach nur verlinken braucht. Und ich habe bis jetzt noch keinen XML-Editor gesehen, oder kein Tool, dass das einfach kann. Da wären wir bei dem, was sie vorgestellt haben, da geht es ja darum, dass man mit Wörterbüchern verlinken kann. **I: Genau.** B: Ja? Also das sind alles... Ja? Sehr unterschiedliche Ansätze.

**I13-3#I: Gut. Dann gehen wir mal auf speziell ihre Perspektive ein. Mit welchen Erwartungen sind sie zu diesem Workshop gereist? Was haben sie sich da vielleicht erhofft, beziehungsweise erwartet?** B: Also ich habe mir schon vorgestellt, dass wir einen Quelleneditor bekommen, der XML-basiert ist und der eben diese Register verwalten kann, zum Beispiel. Also ich gehe immer von den R aus. Da kenne ich mich am besten aus. Da brauchen sie einen ganz normalen XML-Editor, wo sie verschiedene Blöcke dann anlegen können für den Regestentext. Und so weiter. Und so weiter. Dann: Wenn sie noch eine Registerverwaltung haben, wo sie die Register ablegen können. Das Schöne wäre natürlich bei ihrem Modell, dass man die Register gemeinsam nutzen könnte – wäre ein Riesenvorteil, große Arbeitserleichterung. Und in den Gesprächen mit ihren Projektleitern wurde auch immer appelliert, dass das möglich sein würde. Entsprechend enttäuscht war ich etwas, dass das ganze Projekt doch sehr sehr stark auf germanistische, wörterbuchtechnische Ansprüche zugeschnitten war.

**I13-4#I: Ja. Ja, das war jetzt zumindest bei diesem Workshop der Fall. Also gerade, was die Editionswissenschaften angeht, eher mit germanistischem Schwerpunkt. Aber der kollaborative Ansatz, der war ja zu erkennen. Danke ich. Also den haben sie auch als vielversprechend angesehen.** B: Nein. **I: Also sie haben hier geschrieben: Der kollaborative Ansatz ist sehr...** B: Ach so, der kollaborative... **I: Der kollaborative. Ja.** B: Ich habe

verstanden kooperativ. **I: Nein. Nein.** B: Weil kooperativ ist es in keinster Weise gelaufen. Ich habe mit den Projektleitern schon ganz am Anfang kommuniziert und habe gebeten, dass da die Historiker mehr eingebunden werden müssen. Ist nicht passiert. **I: Ah ja. Nein, ich hatte jetzt den kollaborativen Ansatz gemeint, insofern, als dass man über dieses TextGrid-Lab eben mit verschiedenen Projekten zusammenarbeiten kann und eben auch dezentral arbeiten kann.** B: Das ist sehr gut. **I: Ja. Inwiefern ist das speziell aus ihrer Perspektive relevant? Wie könnte das zur Anwendung kommen?** B: Ja zum Beispiel... Nehmen wir wieder das Beispiel R. Da gibt es bei den R, Mitarbeiter in mehreren Bundesländern in der Bundesrepublik, aber auch Mitarbeiter in Ö, die dort arbeiten. Und im Endeffekt arbeiten die alle an einem großen R-Werk. Wenn man da einen onlinegestützten Editionsansatz fände, würde das natürlich die Arbeit in bestimmten Dingen sehr erleichtern – zum Beispiel: Gemeinsames Register. Im Moment ist es so, dass die Hälfte einzeln erstellt werden, die Register auch einzeln erstellt werden. Und wenn sie dann das Heft, das Einzelheft hochbringen, müssen sie immer sehen, dass sie sich im Rahmen des Gesamtregisters befinden. Das würde sich bei einem solchen Ansatz dann erübrigen, weil die das Register ja direkt aus dem Gesamtregister erstellen. Und wenn sie dann neue Einträge haben, ergänzen sie das im Gesamtregister und die Sachen stehen dann den anderen auch zur Verfügung. **I: Ja, das heißt...** B: Also das ist schon ein sehr interessanter Ansatz. **I: Können sie sich vorstellen, dass der auch wirklich nutzbar gemacht werden kann für ihre Forschungen, beziehungsweise ihre Tätigkeiten?** B: Ja sicher. Also ich vermute, dass das in Zukunft ein wichtiger Ansatz sein wird, gemeinsame kollaborative Editionsplattformen. **I: Also sie sehen da auf jeden Fall auch ein großes Potenzial.**

**I13-5#Stichwort eHumanities. Wo sehen sie da die Potenziale? Also jetzt vernetzte Arbeitsprozesse haben wir angesprochen. Vernetzung von Inhalten wäre ein zweiter großer Aspekt.** B: Das ist ganz schwierig. Also da habe ich eine etwas zwiespältige Meinung. Bei den eHumanities, da fehlt mir irgendwie die technische Grundlage, um da Arbeit zu investieren. Also angenommen, wir hätten jetzt irgendein geisteswissenschaftliches Projekt, das in einer Datenbank im Netz steht und wo dann Fachwissenschaftler unheimlich viel Arbeit darauf verwenden, Zusammenhänge mit Links zu verdeutlichen. Dann stellt sich für mich die Frage: Was passiert, wenn die Datenbank upgedatet werden muss. Wenn das Projekt ausläuft. Wenn die Rahmenbedingungen, die IT-Infrastruktur nicht mehr da ist. Dann ist das alles weg. **I: Also eine Frage der Nachhaltigkeit.** B: Ja. Und die ist gleichzeitig verbunden, die Frage der Nachhaltigkeit ist gleichzeitig verbunden, mit einer..., mit der Frage der Standards. Und die Frage

der Standards ist verbunden mit der Tiefe der Auszeichnung. Also sie können nur Standards finden, wenn die Auszeichnungstiefe nicht zu hoch ist. Also das ist meine Sicht der Dinge. Also ich bin da immer eher für eine flache Auszeichnung, die man gemeinsam vornimmt. Und dann kann man immer noch näher ran. **I: Ja, verstehe.** B: Aber es müssen unbedingt Standards definiert werden, mit denen ich dann auch auf einem Onlineauftritt die Daten rausholen kann und kann sie zum Beispiel in ein XML-Framework einspielen und mir... Und die XML-Datei ist so selbsterklärend strukturiert, dass ein fachwissenschaftlich ausgebildeter Mensch das auch erkennen kann, worum es geht. **I: Ja. Also sie sprechen sich dafür aus, dass praktisch diese Kodierungsbarriere... Also dass man da diese Sprache komplett beherrschen muss, diese Barriere muss reduziert werden, damit jeder damit umgehen kann ohne...** B: Also sie muss wegfallen. Aber das Problem ist, sobald die, wenn sie jetzt angenommen einen Standard da etablieren, dann legen sie sich ja auch auf gewisse Auszeichnungen fest. Das heißt, das verliert dann wieder an Flexibilität. Mal angenommen sie würden da so ein kollaboratives Tool entwickeln und das würde dann auch umfangreich genutzt. Dann würden sich andere Programme anschließen. Würden die Sachen genauso darstellen. Aber dann ist es schon wieder das Problem, wenn sie jetzt neue Features implementieren, haben sie wieder ein Problem, weil die anderen das nicht lesen können und so weiter und so weiter.

**I13-6#I: Ja. Gut. Mal angenommen – die Probleme, die sie jetzt ansprechen, ja, mag es ja geben – aber mal angenommen, es kommt zu einem solchen eHumanities-Projekt, das auch angenommen wird. Sehen sie da Möglichkeiten, dass auf diese Weise auch wissenschaftliche Erkenntnisse gewonnen werden können, die vielleicht mit konventionellen Methoden nicht möglich wären? Mit digitalen Mitteln.** B: Also die konventionellen Methoden an sich, die gibt es ja gar nicht mehr. Heute ist es ja so, dass wissenschaftliche Forschung in der Regel immer schon digitalisierte Quellen einsetzt und auch auswertet. Die Frage ist, ob eine Bereitstellung dieser digitalisierten Quellen in einen größeren Zusammenhang, wie zum Beispiel einer digitalen Nationalbibliothek, auf diese Weise neue Erkenntnisse bringen könnte. Das wäre sicher möglich. Ansonsten, wenn sie danach fragen, ob man mit der Datenbank mehr anfangen kann, als mit Bleistift und Papier, ja? Das ist klar. Aber das wussten wir auch schon vor zehn Jahren. **I: Ja klar. Ja also was eben von Interesse wäre, wären Möglichkeiten zur Mustererkennung, beispielsweise in großen Datenbanken...** B: Zum Beispiel? **I: Ja das...** B: Reguläre Ausdrücke. **I: In der Richtung. Genau.** B: Die müssen sie auch erst lernen. **I: Ja. Das stimmt. Ja.** B: Also reguläre Ausdrücke ist zum Beispiel aus meiner Sicht ein sehr, sehr interessantes Feld. Ja? Sobald

sie große Volltextdaten machen, zusammenbekommen, können sie ja einen gewissen Grad an Auszeichnung auch noch einsparen, indem sie reguläre Ausdrücke benutzen. Auszeichnung bedeutet ja immer: Subjektiver Eingriff in das Material. Also ich bestimme jetzt, dass das ein Personennamen ist und kein Ortsname. Da muss ich ja erstmal richtig liegen. Da gehen wir mal von aus. Aber ich könnte ja auch falsch liegen. Oder ich könnte einen Ortsnamen vergessen. Wenn sie reguläre Ausdrücke benutzen, aus einer Datenbank von Ortsnamen zum Beispiel abgleichen. Alle Wörter. Dann haben sie einen anderen Ansatz, der aber vielleicht einen anderen Grad an Vollständigkeit aufweist. Also da ergeben sich sicher viele Möglichkeiten.

**I13-7#I: Also bei Auszeichnungen beziehungsweise bei, ja, bei der Annotation entstehen ja Verknüpfungen. In dem Workshop war es so, dass Verlinkungen zu Wörterbüchern entstehen. Ähnlich ist es ja auch in der Geschichtswissenschaft denkbar. Das wäre jetzt von Interesse: Diese Verknüpfungen sichtbar zu machen, halten sie das für sinnvoll? Und sehen sie da eine Möglichkeit, neue Erkenntnisse zu erlangen?** B: Also neue Erkenntnisse? Ja, was heißt...? Was meinen sie mit Verknüpfung? Wenn ich jetzt zum Beispiel auf Quellentexte verweise, der jetzt woanders online liegt, oder was? **I: Zum Beispiel. Ja. Da entsteht ja dann praktisch durch diese Verknüpfung auch ein Netzwerk, das zu einem Thema jeweils in Beziehung steht. Und das sichtbar zu machen, wäre ja auch ein Mehrwert. Oder wie sehen sie das?** B: Also dann muss ja die Sichtbarmachung erstmal wirklich sinnvoll sein. Wenn ich jetzt auf einen anderen Text verweise, der irgendwo online steht, könnte ich ihn ja einfach kopieren. **I: Ja. Natürlich klar. Es hat natürlich dann auch seine Grenzen...** B: Also bei diesen Vernetzungssachen bin ich ein bisschen skeptisch, weil... Sie hatten, wie soll ich das sagen... Die verlinken kreuz und quer und kreuz und quer. Und wo ist dann...? Irgendwann verlinkt man sich nur noch, alles auf alles. Und alles ist ja irgendwie relevant. Und sie verlieren die Fragestellung aus dem Fokus. **I: Ja. Also man verheddert sich in dem Netz praktisch irgendwann.** B: Ja, würde ich so sehen. Und... **I: Das heißt, man müsste da in irgendeiner Weise Ordnungsstrukturen schaffen.** B: Das ist ja eigentlich der Sinn der wissenschaftlichen Arbeit. Dass sie aus einem Riesenberg an Quellen, dass sie den untersuchen und auf Ordnungsstrukturen hin untersuchen. Wenn sie dann Verlinkungen herstellen, ist das immer die subjektive Ansicht eines Forschers. Und ich finde ein großes Problem bei den Verlinkungen, dass sie zum einen Mal auch dauerhaft sein müssten, und dass bei den Verlinkungen auch klar sein müsste, wofür sie gut sind. Nur dass da ein Link ist, sagt mir ja noch nichts über die Funktionsart des Links. **I: Ja. Also Spezifikation der Verknüpfung wäre wichtig.** B: Das ist wie bei

Wikipedia. Wenn sie das aufschlagen, da werden dann plötzlich alle Wörter, die irgendwo in der Wikipedia vorkommen, sind blau. Das bringt mir gar nichts. Ja. Das regt mich eher auf. Ja? Weil ich dann immer denke: Ja. Toll. Jetzt kriege ich dann erklärt, wie der Begriff wissenschaftlich definiert ist. Aber ich hätte gerne lieber etwas ganz anderes gewusst. Also es ist ja nur ein eindimensionaler Hinweis.

**I13-8#I: Ja. Ja. Ok. Jetzt noch mal zurück zum TextGrid-Lab. Ganz konkret. Das ja auch sie getestet haben. Ich habe hier den Fragebogen vorliegen. Ich habe jetzt über die Themen mit ihnen gesprochen, zu denen sie eine Anmerkung gemacht haben beziehungsweise wo sie ein Potenzial gesehen haben. Ansonsten gibt ihr Fragebogen her, dass sie das größtenteils eher noch sehr ausbaufähig, wenn man es positiv ausdrückt, finden, beziehungsweise zum Teil einfach schlecht bewertet haben. Könnten sie genauer darauf eingehen, wo sie spezielle Probleme hatten beziehungsweise etwas nicht gut fanden.**

B: Ja zum einen die Ausrichtung, die sehr enge Ausrichtung auf Wörterbücher. Also das TextGrid avisiert einen allgemeinen Ansatz und dann nehmen sie ein Gedicht und sagen: Also sie können das Wort jetzt da suchen. Wo ist der Mehrwert? Ja? Ich könnte jetzt alle Wörter im Wörterbuch nachgucken. Da wäre eine Registerverwaltung praktischer gewesen. Die hätten sie jetzt in allen möglichen geisteswissenschaftlichen Fachbereichen einsetzen können. Das wäre für Germanisten interessant gewesen, aber für Historiker, über Altorientalisten.... Allein wenn sie es geschafft hätten, ein kollaboratives Editionswerkzeug zu erstellen, mit dem man einfach gemeinsam an einer Sache arbeiten kann – mit Registerverwaltung. Das wäre wirklich interessant gewesen. Der Ansatz ist sehr sehr speziell gewesen. Und dann war die Stabilität noch mangelhaft. Ständig ist es abgestürzt. Die Features zum Beispiel, eine TEI-ausgezeichnete Datei einzulesen, das fand ich ganz interessant. Das wäre schön, wenn das besser funktionieren würde. Der Ansatz ist, glaube ich, schon ganz gut. Aber wie gesagt. Die Ausrichtung war extrem eindimensional und wenn das weiter so verfolgt würde, würde ich von einer Weiterförderung abraten, weil es einfach nicht der... Wörterbuchwissenschaften sind wichtig und zentral, aber eben doch nur ein sehr kleiner Teil der Geisteswissenschaften. Und TextGrid ist eigentlich angetreten, eine Workbench für die Geisteswissenschaften zu schaffen und nicht für Wörterbücher.

**I13-9#I: OK. Sie haben aber auch was die Bedienbarkeit des Ganzen, also optische Gestaltung, Navigation und so weiter angeht, das Ganze jetzt auch recht schlecht bewertet, jetzt unabhängig von dem thematischen Fokus beziehungsweise den Möglichkeiten, die...**

B: Das war zum einen die Instabilität. Und vor allem stelle ich mir natürlich immer die

Mitarbeiter vor, mit denen ich zu tun gehabt habe, die das dann Nutzen sollten. Also da können sie keinen Blumentopf gewinnen mit. So schlimm es klingt, ja, aber im Endeffekt muss es so ein bisschen aussehen wie Word und muss schnell und einfach zu bedienen sein. Und... **I: darf nicht soviel vorausgesetzt werden.**

I13-10#B: Ein negativer Punkt ist mir noch aufgefallen, ich weiß nicht, ob ich den im Fragebogen angedeutet habe. Also bei der Vorstellung des Projekts wurden teilweise Funktionen, die in Eclipse sowieso schon implementiert sind, als Neuentwicklung von TextGrid dargestellt. **I: Ja? Welche?** B: Das kommt natürlich in der OpenSource-Community ganz schlecht an. Wenn man sich mit fremden Federn schmückt. **I: Welche waren das?** B: Das mag ein Versehen gewesen sein. Das weiß ich jetzt nicht mehr. Das war in der mündlichen Einführung. Ich hab mich da mit meinem Kollegen unterhalten anschließend. Da haben wir gesagt, zum Verlinken ist nichts drin gewesen. Ja? Das haben sie einfach benutzt. Also da müssen sie aufpassen, wenn das ein DFG-Gutachter sieht, die sind ja heute auch teilweise vom Fach, und sieht, dass sie da Features anpreisen, die sowieso in den Kits drin sind. Das könnte Probleme geben. **I: Ja. Ok. Sie wissen jetzt aber nicht, was das konkret war?** B: Ach, das war irgend so ein... Irgendein Baustein von Eclipse. Das kann ich ihnen aber nicht mehr sagen. **I: Ja. Gut. Ne, ist aber interessant zu wissen. Kann sein, dass das...** B: Das ist aber auch im Hinblick darauf, sollte man die Berichte an die DFG genau durchsehen. Dass da wirklich nur die eigene Leistung drinsteht.

**I13-11#I: Ja, dann vielleicht einfach abschließend und zusammenfassend. Was sehen sie als größten Fortschritt beziehungsweise größtes Potential an, des TextGrid-Lab, wie es getestet wurde. Und was sehen sie als größtes Manko an?** B: Also der größte Fortschritt ist der kollaborative Ansatz. Das muss ich sagen, dass ist eine sehr gute Sache. Das finde ich zukunftsweisend. Vor allem, dass es auch auf offenen Standards beruht. Dass man XML benutzt. Und dass es von überall aus benutzbar ist. Das ist sehr gut. Als größtes Manko sehe ich den aus meiner Sicht falschen Focus auf Wörterbuchwissenschaften, die mangelnde technische Stabilität, ja, die Fokussierung auf Features, die nur in einer sehr kleinen Wissenschaftscommunity wirklich genutzt werden. Ja, das wäre eigentlich so. Oder habe ich noch was vergessen? **I: Ja, das kann ich ihnen nicht beantworten.** B: Aber wenn ich jetzt so überlege, worüber wir gesprochen haben? Nein, also das ist. Ja, das ist eigentlich so alles. **I: Gut.**

I13-12#B: Ach so, ein Punkt noch: Sie haben unheimlich viel, so kam es jedenfalls bei mir an, unheimlich viel Zeit in den Identifikationsmechanismus investiert. **I: Bei dem Workshop? Oder?** B: Nein, nein, bei der Entwicklung. Ja? Und ich meine, das ist wirklich das Pferd von

hinten aufgezümt. Das hätten wir wirklich gleich sparen können. Da hätten sie einfach lieber in Features investieren sollen, die für die geisteswissenschaftliche Fachcommunity interessant sind und erstmal völlig die Finger weglassen von irgendwelchen Authentifizierungsmethoden. Die Leute sind sowieso gewöhnt, fünf Passwörter nebeneinander zu haben. Und da ist aus meiner Sicht der Fokus falsch ausgerichtet gewesen. Da ist man sehr breit gestartet. Auch vom Anwendungsprofil. Ich meine, die Idee ist natürlich gut. Ja? Jeden nervt es, wenn er zu viele Logins hat und so weiter. Aber ich glaube, sie müssten erstmal durch Features überzeugen und nicht durch Anmeldemechanismen. **I: Ja. Ok. Gut, dann bedanke ich mich herzlich für das Gespräch. Für die Rückmeldung. Für die interessanten anregenden Kritikpunkte. Und ja. Das Interview wäre dann soweit fertig.** B: So, schalten sie das Ding jetzt ab? **I: Ja. Moment. Ich sage ihnen Bescheid.**

I13-13#[Nach dem Ausschalten will der/die Befragte doch noch etwas anmerken. Interview und Aufnahme werden fortgesetzt] B: Ok? **I: Ja. Die Archivfunktion...** B: Ganz wichtig aus meiner Sicht ist die Archivfunktion von TextGrid, wenn man fertige... Angenommen man druckt ein Editionswerk. Ja? Und hat dann überall XML-Dateien. Dass man das dann in TextGrid einstellen kann, wenn es volltextdurchsuchbar ist, dass es auch so da drin stehen bleibt. Da steht der Text an sich der Forschungs-Community zur Verfügung, kann im Hinblick auf linguistische Fragestellungen untersucht werden oder von Fachwissenschaftlern auf inhaltliche Fragen untersucht werden – quasi eine digitale Parallelbibliothek zu unserer normalen Bibliothek. Das wäre ein Feature von TextGrid, das sehr wichtig wäre. Und natürlich auch die Langzeitarchivierung, die man da drin hat. **I: Und auch die Archivierung von großen Datenmengen, die das ermöglicht.** B: Ja, wenn ich Volltext nehme, was ist denn dann groß? Bei Bildern wird es spannend. Ich weiß ja nicht, ob das angedacht ist. Aber es heißt ja TextGrid und nicht BildGrid. **I: Ist aber durchaus auch beabsichtigt.**

I13-14#B: Ja, gut. Das ist auf jeden Fall aus meiner Sicht eine sehr interessante Richtung, in die sich das TextGrid entwickeln könnte, einfach, dass man digitale XML-Bilder von normalen Büchern dort einspielen kann. **I: Ja, also gar nicht tiefer ausgezeichnet, sondern nur als Volltext vorhanden?** B: Ja, ich stelle mir eben als Auszeichnungs... Ja, ich würde die Auszeichnungsmerkmale bieten, die ein ganz normales Buch bietet. Die Titelseite als Metainformation, dann das Inhaltsverzeichnis, dann den Seitentext, die Überschriften auch ausgezeichnet. Ja, da kann man ja mal durchgucken, was es für Überschriften gibt, in dem Buch. Und dann den Volltext, ganz normal, vielleicht mit Fußnoten noch dabei. Muss auch nicht sein,



man kann das auch einfach pro Seite einfach runterdigitalisieren. Dass ich den Volltext durchsuchen kann und hintendran die Register. **I: Also einfach zum Beispiel komplette Bücher ins Netz, in das digitale Medium übertragen, mit den Ordnungsmechanismen, die sie auch offline bieten könnten.** B: Genau. Genau. Das..., die Ordnungsmechanismen der Bücher im digitalen Netz abbilden. Und da hat man dann einen gemeinsamen Standard, den auch jeder versteht. Vielleicht wäre das eine Möglichkeit, so eine..., so zu einem gemeinsamen Punkt zu kommen, auch zwischen den verschiedenen fachwissenschaftlichen Communities. Und TextGrid könnte dann einen kollaborativen Editor bieten, mit dem man dann solche Werke im Internet dann auch erstellen kann. Das wäre eine Basis. Da würde man sagen: Ok. Da hätten wir etwas. **I: OK. Gut. Vielen Dank für die Anregung.** B: Ja.
