# Supplementary material
Source: publisher site journal article supplement (https://www.degruyterbrill.com/publication/isbn/9783110463927/downloadAsset/9783110463927_Interviews.zip)
Supplement: Supplementary file 6 [file I14.pdf › Interviews/I14.pdf]

**I14-1#Interviewer: Gut. Ja. Zuerst würde ich gerne etwas über ihren Hintergrund wissen. Hier auf dem Fragebogen steht lateinische Philologie als Fachdisziplin. Mich würde besonders interessieren, welche EDV-philologische Erfahrung sie mitbringen. Wie ihre konkrete Tätigkeit in dem Bereich aussieht.**

Befragte/r: Also im Moment zielen meine Arbeiten auf eine Onlineedition ab. Also wir machen Glossen-Editionen in M. Und die Idee, die Glossen in einem Hypertext zu präsentieren, die ist eigentlich schon lange..., die geht so auf die Zeit zurück, wo ich studiert habe. War eben klar: Glossen kann man nicht in Buch..., also Glossen-Kommentare und so Kommentierungs-Traditionen, kann man nicht im Buch drucken. Und man hat eben das Hypertextmodell..., da hat sich jetzt halt die Gelegenheit ergeben, dass wieder aufzugreifen. **I: Und in welchem Rahmen findet das statt? Was ist das genau für ein Projekt?**

B: Also das nennt sich Glossenedition, sind also bei den klassischen Philologen angesiedelt. Gibt es eine extra mittellateinische Abteilung, das ehemalige mittellateinische Seminar in M. Und es sind noch vier Leute, die jetzt da arbeiten, bei zwei Teilprojekten: C-Glossen und P-Glossen. **I: Was haben sie genau studiert, wenn ich fragen darf?** B: Ich habe, sagen wir mal ursprünglich in erster Linie Mathe und Physik studiert, nebenher Mittellatein, und das hat sich dann so im Laufe des Studiums ein bisschen umgedreht und habe dann in Mittellatein promoviert, aber dann Physik dann auch schon noch zu Ende studiert. Aber schon in erster Linie Mittellateiner geworden.

**I14-2#I: Mit welchen Erwartungen sind sie zum TextGrid-Workshop gekommen? Mit welchen Erwartungen, meine ich, an diesen Workshop? Jetzt vor ihrem Hintergrund, vor dem was sie EDV-philologisch machen?**

B: Also konkrete Erwartungen hat man da nicht. Das war mehr so die Spannung: Wie sieht das aus? Da war ich noch relativ naiv, keine Ahnung was da auf uns zukommt. **I: Und ihr Gesamteindruck dann zunächst nach dem Workshop?**

B: Also der war gut. **I: Was hat ihnen besonders... Was ist ihnen besonders positiv aufgefallen und wo waren eher Probleme für sie?**

B: Also das Ding wenn ich..., was mir so gefallen hat, das war eigentlich, dass man gemerkt hat, das entwickelt sich und wird. Und die Leute, die dahinter stehen, die sind engagiert. Und man hat ja nicht viel Zeit gehabt wirklich zu arbeiten und deswegen war das entscheidend: Benutzerfreundlichkeit oder so, dass man in relativ kurzer Zeit gemerkt hat: Damit kann man gut arbeiten. Und im Detail konnte man halt noch nicht viel machen... Also da war, sagen wir mal, kleine Enttäuschungen da. Aber letztlich, wenn man einen Tag, oder was war es, ein halber Tag, den wir gearbeitet haben. Da kann man vielleicht nicht... da

kann man das einfach nicht erwarten. **I: Ja klar. War irgendein Punkt wo sie jetzt sagen: Da war eine leichte Enttäuschung? Könnten sie das konkretisieren? Was... Wo hätten sie gerne mehr schon gehabt? Vor allem?** B: Ich meine: Was haben wir gemacht? Wir haben ein Gedicht mit einem Wörterbuchartikel verlinkt. Also das ist halt wenig. Vor allem von Hand einen Link setzen, also das, dazu brauche ich ja kein Werkzeug. Kein großes. Und selbst das war dann ein bisschen spröde, bis der dann wirklich saß. Dieser Link.

**I14-3#I: Ich greife einmal kurz Bewertungen auf, die sie im Fragebogen nach dem Workshop gemacht haben, die dann eher negativ ausgefallen sind, wenn wir jetzt gerade bei dem Punkt sind, dass wir die Kritikpunkte mal durchgehen. Da wäre zum einen: Ich konnte meine Aufgaben in der vorgegebenen Zeit mit dem Lab erledigen. Da haben sie, ja, die zweitnegativste Bewertung gewählt. Also wo war da genau das Problem?** B: Ich konnte... Was nochmal genau? **I: Ich konnte meine Aufgaben in der vorgegebenen Zeit mit dem Lab erledigen.** B: Also was war denn meine Aufgabe? **I: Naja. Die Bearbeitung dieses Gedichts. Die Verlinkung und eben die Aufgabenstellung, die während des Workshops durchgegangen wurde.** B: Meine Aufgabenstellung? Ich glaube, ich habe da einfach irgendwann dann den Anschluss verpasst und dann die Aufgabe nicht erledigt. Kann das sein? Aber so konkret war doch die Aufgabe gar nicht. So... oder hatten wir etwas Spezielles? **I: Na, es waren ja bestimmte Arbeitsschritte, die mit diesem Gedicht vollzogen wurden.** B: Ja. Ich glaube, irgendwo habe ich dann den Faden verloren und deswegen bin ich nicht mehr mitgekommen. Vielleicht war es das. Ich weiß es nicht mehr so genau.

**I14-4#I: Ok. Dann: Es war einfach die Daten zu finden, die ich für meine Arbeit gebraucht habe. Und: Die abrufbaren Datenbestände haben mir geholfen, dass... Da ging es auch eher in die negative Richtung. Also die zur Verfügung stehenden Daten, die verwendet werden sollten. Wie hatten sie da das Problem wahrgenommen?** B: Was hatten wir denn als Daten? Wir hatten das Gedicht. **I: Na die abrufbaren Datenbestände. Also das Wörterbuch...** B: Die Wörterbücher... **I: Oder Recherchemöglichkeiten. Ja.** B: Ja. Und dann hatten wir das Goethewörterbuch. Also das war jetzt irgendwie nahe liegend, dass man da einmal mit dem Goethewörterbuch arbeitet. Und das hat sich dann irgendwie als unvollständig...erwiesen. Und, mal gucken, ob es damit zusammenhängt, aber wenn ich mir die Kreuzchen nochmal angucke, dann fällt mir vielleicht auch etwas dazu ein. **I: Ja. Das waren eben diese beiden Punkte. Es war einfach die Daten zu finden, die ich für meine Arbeit gebraucht habe. Da hatten sie eher: Trifft nicht zu. Und auch hier: Die im Lab abrufbaren Datenbestände haben mir bei**

**der Bearbeitung meiner Aufgabe geholfen. Da ging es auch eher in die Richtung. Deshalb. Das hängt ja zusammen.** B: Kann ich mir einmal da kurz angucken, damit ich mich da kurz erinnere? **I: Ja.** B: Das ist wirklich die Frage, was ich da als meine Aufgabe begriffen habe? **I: Ja. Ja. Das war ja jetzt die Station vorher. Das kann aber gut sein, dass sie an einer Stelle dann kurz den Anschluss verloren haben und das dann so... Deshalb frage ich ja jetzt nochmal nach. Das ist immer das Problem beim Fragebogen.** B: Ja, aber meine Aufgabe ist natürlich die Frage. Ob ich mir jetzt selber da eine Aufgabe gestellt habe, die ich dann einfach nicht gescheit lösen konnte, weil ich dachte, ich müsste da jetzt irgendetwas hinkriegen.

**I14-5#I: Naja gut, das wollte ich nur einmal durchgehen. Noch eins: Hier die Hilfefunktionen. Da haben sie auch eher... Und die Fehler bei der Nutzung des Labs sind leicht zu korrigieren. Da haben sie auch eher in die negative Richtung tendiert. Also da ist für sie noch ein Verbesserungspotenzial, was Hilfefunktionen angeht, was Benutzerführung angeht vielleicht? Oder was genau meinten sie damit?** B: Hilfefunktionen. Das weiß ich ja ehrlich gesagt nicht mehr so genau. Wahrscheinlich wollte ich, habe ich irgendetwas versucht zu machen. Ich habe mir, glaube ich, irgendwie in den Kopf gesetzt, zwei Dinge zu verlinken. **I: Ja. Und haben das in der Dokumentation dann nicht finden können.** B: Ja. Das ging noch nicht. Also, dass da Potenzial drin ist, das war ja klar, also Entwicklungspotential. Also den Eindruck hat es auch gemacht. Dass, so wie das gestaltet ist, dass da noch einiges geht und dass das jetzt noch nicht alles funktioniert. Das macht ja nichts.

**I14-6#I: Ja, eine Beta-Version... Gab es denn schon Funktionen die für sie völlig neu waren? Oder Konzepte die für sie völlig neu waren?** B: Naja, also, die in der Nutzung völlig neu waren, sagen wir mal so. **I: Und welche?** B: Naja. Also. Das war eigentlich alles neu. **I: Ja. Aber sie haben wahrscheinlich schon vorher einmal mit XML-Editor gearbeitet – zum Beispiel.** B: Ja. Ja. Genau. Das schon. **I: Aber das Drumherum...** B: Das Drumherum, das macht das ja aus. Aber gut. Also so... Ich glaube vielleicht so einen fortschrittlichen habe ich vielleicht noch nicht gehabt. Wie ging das nochmal? Also da konnte man so automatisch TEI-Header generieren und diese... dann die... dass der immer direkt die Strukturfehler angezeigt hat, das war für mich neu eigentlich. Das hat halt auch nicht gescheit funktioniert. Ich hatte da immer irgendwie, irgendeinen Fehler angezeigt, glaube ich, und habe dann die Anzeige nicht weggekriegt. Ich mein, das hätte mich irritiert. **I: Ja. Das... Das war des Öfteren der Fall. Welche Stellen waren für sie am problematischsten? Wo sind sie hängen geblieben? Wissen sie da noch etwas, was ihnen besonders... was besonders gehakt hat?** B: Also außer dem jetzt.

Weiß ich nicht. Wir müssen da noch ein bisschen schwätzen, dass ich mich wieder erinnere, was wir da genau gemacht haben.

**I14-7#I: Ja. Gut. Ich... Wir müssen das jetzt auch nicht so eng an dieser Benutzeroberfläche durchgehen. Mich interessiert vor allem, welche Funktionen ihnen beispielsweise noch gefehlt haben. Welche sie für ihre Arbeit brauchen.** B: Also wir speziell, wir haben natürlich erstmal so Text-Bild-Verlinkung im Sinn. Das wurde ja auch vorgestellt, wie weit das ist und dass es demnächst fertig sein soll. Das würde uns natürlich im Sinne liegen. Aber so.... hätten wir halt gerne. Aber wie es, wie da vorgeführt wurde, könnte ich mir auch vorstellen, dass das nicht ganz ausreicht für unsere Zwecke. Also wenn man von Hand, die... diese Text-Bild-Links eingefügt hat... Auf der Textseite schien es mir noch ein bisschen wenig offen für, jetzt, kompliziertere Textstrukturen, so wie wir sie jetzt haben in den Glossenkommentaren.

**I14-8#I: Wie sieht es da aus, wenn sie selber praktisch das Tool noch erweitern könnten oder ein eigenes Tool anschließen. Wäre das wichtig für sie oder wäre das ihnen wichtiger, dass das ihnen zur Verfügung gestellt wird?** B: Ja. Nein. Das wollen wir natürlich. **I: Also dieser graphische Linkeditor. Wenn der für ihre Zwecke nicht komplex genug ist oder nicht ausreicht, wäre es für sie wichtig, entweder ein eigenes Tool anschließen zu können oder selber ...** B: Also wenn es die Möglichkeit gibt, dann machen wir das natürlich. Aber das sah ja so aus als könnt man jedes beliebige Tool einbinden, oder? **I: Das ist die Grundidee. Ja.** B: Ja. Ja gut. Das könnte natürlich sein, dass gewisse Anforderungen an Standards da sind, die wir vielleicht nicht erfüllen. **I: Das wäre also wichtig, dass Schnittstellen zur Verfügung stehen, an die man anschließen kann. Und als Problem sehen sie die Standardisierung. Oder?** B: Möglicherweise. Also keine Ahnung. Wir haben halt auch ganz speziell so ein Text-Bild-Tool entwickelt, aber das schon natürlich speziell auf unsere Zwecke abgestimmt ist. Und... So vom Konzept her dachte ich, dass müsste schon passen. **I: Ansonsten zum Thema Individualisierbarkeit. An welchen Stellen wäre das für sich noch besonders wichtig? Also Anpassung des Ganzen an ihre Arbeitsweise. Außer direktes Anschließen von Tools. Spielt das für sie eine Rolle? Also dass sie die Oberfläche so gestalten können, wie sie sie speziell für ihre Arbeit brauchen?** B: Es schien ja auch ziemlich vielfältig zu sein. Also die Gestaltungsmöglichkeiten. Das war durchaus beeindruckend, was man alles so unterbringen kann. Das muss man natürlich in der Praxis dann erstmal sehen. Kann ich jetzt noch nichts dazu sagen.

**I14-9#I: Wie fanden sie die Navigation, die Organisation des Ganzen?** B: War relativ schnell

zu durchschauen. Wenn man jetzt die Komplexität bedenkt, die angestrebt ist, dann finde ich, konnte man sich gut zurechtfinden. **I: Haben sie schon einmal mit Eclipse gearbeitet? Mit einer Eclipse-Plattform, auf der das ja auch basiert?** B: Nein. **I: Nein. Gut.**

**I14-10#Gut. Dann weg von dem konkreten Lab, hin zu eHumanities als Begriff oder als Idee. Da kann man... Da wird ja davon gesprochen, dass eine digitale Infrastruktur aufgebaut werden soll, kann man einfach ausgedrückt verstehen als eine Vernetzung von Inhalten, aber auch von Arbeitsprozessen – also kooperativer Ansatz. Was spielt dieser kooperative Ansatz für eine Rolle aus ihrer Perspektive? Also Verbesserung der Zusammenarbeit durch digitale Infrastruktur.** B: Na, es ist halt spannend. Aber welche Rolle der spielt, das wird man sehen. Aber der ist schon wichtig. Also das muss man halt mal ausprobieren. **I: Ja. Wie sieht bisher ihre Zusammenarbeit mit, ja über eine Distanz aus? Oder arbeiten sie in dem Projekt jetzt recht isoliert in M? Oder gibt es da andere Formen der Onlinezusammenarbeit zum Beispiel?** B: Nein. Nein. Ja gut, das ist traditionell, sagen wir mal, Zusammenarbeit in der Wissenschaft, international. Aber Onlinezusammenarbeit jetzt in dem Sinne, dass man gemeinsam am... na ja an denselben Dateien arbeitet... Man verschickt sie sich halt. Man schickt sie sich zu, per E-Mail. **I: Per Mail.** B: Und sagen wir mal so: In unserem Netzwerk, dort probieren wir schon auch einiges aus. Also wenn wir jetzt Handschriften bearbeiten und an speziellen Stellen Probleme haben, dass man mit dem Adobe Professionell da so Kommentare dranheften... Und dann tauchen halt gelegentlich mal Konflikte auf, dass eine Datei von Zweien gleichzeitig bearbeitet wird und irgendwelche Konflikte auftreten. Grundsätzlich möchte man da gerne ein bisschen mehr experimentieren. Das ist schon wichtig.

**I14-11#I: Welche Möglichkeiten sehen sie da, durch Strukturen wie sie in TextGrid möglich sein könnten? Schwebt ihnen da etwas vor, was man konkret machen könnte, was bisher nicht ging?** B: Ja. Also ich meine, es sind halt so ein paar Projekte deutlich geworden, sagen wir mal in den letzten Jahren, wo man einfach alleine niemals fertig werden würde und sich wünschen würde: Ok, da kann ich noch ein bisschen etwas dran machen. Und wenn andere auch etwas daran machen, dann wird vielleicht irgendwann einmal etwas daraus, aber, die halt so traditionell einfach nicht zu lösen sind. **I: Können sie da ein Beispiel sagen, warum die jetzt auf traditionelle Art und Weise, wie sie sagen, nicht zu lösen sind?** B: Weil da zuviel Arbeit ist. Sagen wir mal: Also wenn wir Glossen edieren und da ist so eine große Handschrift mit vielen Glossen, alle Ränder voll, zwischen den Zeilen. Und da bearbeitet man halt gerne einmal ein Stück, also so ist es auch, was weiß ich, seit der frühen Neuzeit gemacht worden. Jeder

bearbeitet ein Stück und findet irgendetwas Interessantes, publiziert das dann, und was letztlich dabei rauskommt ist, dass man so den Blick für das Ganze verliert, weil es dann immer nur separat publiziert ist. Und wer wieder speziell sich damit beschäftigen will, der muss wieder von vorne anfangen. **I: Das heißt es wäre schon einmal nützlich, wenn man diesen Blick auf das Ganze eventuell dadurch organisieren könnte, oder veranschaulichen könnte, indem man zusammenträgt, was einzelne daran gearbeitet haben?** B: Genau. Ja. Zum Teil ist das auch in unseren Handschriften so ein bisschen vorangelegt. Die sind halt für Kommentierung angelegt. Da ist ein großer Zeilenabstand, breiter Rand drin. Und an einigen Handschriften sieht man auch, dass da mehrere Generationen kommentiert haben und den Raum ausgenutzt, der da gelassen ist, um.... Deswegen sehen die das Konzept der Zusammenarbeit schon so ein bisschen darin angelegt.

**I14-12#I: Ist denn auf diesem Wege dann für sie wichtig, oder sehen sie das als möglich an, dass man auf diesem Wege auch neue wissenschaftliche Erkenntnisse erlangen könnte? Also mittels digitaler Infrastruktur durch IT-Instrumente?** B: Ja. Ja. Klar. **I: Inwiefern? Können sie da konkrete Beispiele nennen, was man da machen könnte?** B: Also jetzt mir etwas Neues gerade auszudenken – weiß ich nicht, ob mir noch etwas anderes einfällt. Aber solche Dinge, wie ich es jetzt angedeutet habe gerade, wo einfach Projekte einmal liegen können, auch mal länger, ohne dass sie in Vergessenheit geraten. Naja. Denn wenn ich realis..., also sonst nie zu einem Ende kommen. Die gibt es ja schon häufig. So Großprojekte, wo eine Vision da ist, irgendwann vielleicht die Arbeitskraft fehlt. Und die gibt es halt gerade mal bei den Mittellateinern, gibt es die zuhauf, die natürlich auch nicht so wahrgenommen werden unter Umständen. **I: Ja. Also das wäre dann eher der Punkt, etwas verfügbar und sichtbar zu machen, etwas, was beispielsweise lange liegt, damit man problemlos später vielleicht wieder darauf zurückgreifen kann.** B: Ja. **I: Und weitermacht.**

**I14-13#Aber zu dem Punkt, dass man darüber auch wissenschaftliche Erkenntnisse erlangen kann, die man vielleicht mit konventionellen Methoden nicht erlangen könnte. Wir hatten jetzt eben gesagt zum Beispiel: diese Gesamtsicht, die ansonsten vielleicht schlecht zu realisieren wäre. Gibt es in der Richtung noch etwas, was sie sich vorstellen könnten?** B: Ja gut. Zusammenarbeit ist natürlich immer, gerade wenn man räumlich getrennt ist, sinnvoll. Je enger man sieht, was der andere auch macht. Da könnte ich mir schon vorstellen, dass es, einfach durch die Kooperation,... **I: Nach dem Motto: Und vier Augen sehen mehr als zwei... Oder?** B: Ja. Ja. Aber keine Ahnung.

**I14-14#I:** Ok. Diese digitale Infrastruktur wird ja immer als Netzwerk beschrieben. Sie haben gesagt, sie arbeiten jetzt projektintern ja auch schon in vernetzten Strukturen. Wie beurteilen sie die Gefahr, dass man sich in so einem Netzwerk nicht gut zurechtfindet? Wir reden ja jetzt davon, dass über Grid-Technologie das sehr groß wird - also sehr große Datenbestände, sehr viele Verknüpfungen. Was sehen sie da als beste Lösung an, sich in diesem Netzwerk zurechtzufinden? B: Ich habe noch keine Erfahrung damit. Ich bin gespannt mehr oder weniger. Das Gefühl hatte ich schon, dass man sich schnell verliert. Also da war zum Beispiel von dem Publish-Button die Rede. Wenn der mal gedrückt ist, ist das veröffentlicht. Da ist natürlich erstens einmal die Versuchung da, doch mal bald etwas zu veröffentlichen. Und natürlich werde ich Fehler finden und nochmal veröffentlichen. Kann ich mir vorstellen, dass das ganz schön viel wird. Und also, irgendwie, wenn es gar nicht redigiert wird, alles dann bleibt? Ob da, ob ihr bei TextGrid dann wirklich genug Plattenspeicher habt, um das alles aufzubewahren? Keine Ahnung. Bin ich gespannt.

**I14-15#I:** Sie haben ja eben davon gesprochen etwas sichtbar zu machen. Also zum Beispiel diese Draufsicht auf mehrere Projekte. Das ist ja ein Visualisierungskonzept, könnte man sagen. Inwiefern spielen die bei ihrer Arbeit eine Rolle? Sie haben gesagt: Glossen, das wird ja eher als Hypertext kann man das ja ansehen, ist es ja dann angelegt – digital. Wird da auch verzeichnet, was mit was verknüpft ist? Im Sinne eines Netzes? B: Das verstehe ich jetzt nicht, die Frage. **I: Ja. Sie haben ja gesagt, dass diese Glossen verknüpft sind, mit den Texten, in Hypertextform.** B: Genau. **I: Ja. Wird da irgendwie veranschaulicht, wie diese Verknüpfungen aussehen?** B: Also ich hoffe natürlich schon, dass der Leser den Hypertext auch versteht und nicht viel drin rumklickt. Das muss ich natürlich anlegen bei jedem Hypertext. Das ist ganz klar. Und das geht natürlich über das hinaus, was ich direkt auf dem Bildschirm sehe. Aber ich weiß nicht genau, worauf sie hinauswollen. **I: Ja. Das hat mich jetzt nur mal interessiert, wie das aufgebaut wird in ihrem Bereich. Ist es einfach nur dann an der Stelle im Text, in der diese Glossierung verankert ist? Geht dann da einfach das Fenster auf? Oder wie muss man sich das genau vorstellen?** B: Nein. Ich meine, das ist natürlich letztlich die Textstruktur, die da repräsentiert wird. Also nehmen wir einmal den kommentierten Text, einen kommentierenden Text. Die stehen natürlich in naheliegender Weise miteinander in Verbindung. Und dann gibt es verschiedene Handschriften mit dem gleichen kommentierten Text. Die stehen natürlich auch miteinander in Verbindung. Und die Kommentare dazu, die stehen natürlich ihrerseits wieder mit den anderen Kommentaren und ihrem eigenen

kommentierten Text in Verbindung. **I: Das ist ja dann praktisch ein semantisches Netz. Oder? Also wenn...** B: Der Begriff speziell sagt mir nichts. Aber es ist ein Netz. **I: Ja, also mit semantischen Verknüpfungen. Also wenn der eine Kommentar mit dem anderen in Verbindung steht beziehungsweise mit einer Textstelle oder einem bestimmten Wort im Text, dann kann man die Verknüpfung als semantisch bezeichnen.** B: Gut. Ich meine im Mittelalter, im lateinischen Mittelalter, wird halt abgeschrieben. Der eine schreibt vom anderen wortwörtlich ab. Das Wort ist ja schon auch ein bisschen heilig. Und deswegen: Wenn der eine Kommentator von anderen etwas abgeschrieben hat, dann äußert sich das schon in wortwörtlicher Übereinstimmung... in speziellen Textpassagen – wobei, wenn man das als semantisch fassen kann... Das weiß ich nicht. Keine Ahnung.

**I14-16#I: Ok. Was sehen sie als den größten Fortschritt an, den man durch TextGrid erreichen könnte und was sehen sie noch als das größte Manko an, als die größte Schwierigkeit bei dem Ganzen?** B: Das sind jetzt natürlich alles so grundsätzliche Fragen, die ich so leicht jetzt nicht beantworten kann. Also was jetzt, worauf wir jetzt noch gar nicht eingegangen sind, was mir jetzt aber gerade so einfällt, was wichtig ist, wären die Handschriftendigitalisate mit denen wir arbeiten im Moment, die auch einige Bibliotheken anbieten, aber wo halt aber kein anderes Zukunftskonzept jetzt denkbar ist als die TextGrid-Plattform. Selbst die Bibliotheken, die weit vorangeschritten sind, die garantieren zum Beispiel nicht, dass ihre URLs stabil sind. Und das wäre für uns unglaublich wichtig. Also weil wir halt mit allen möglichen kleinen Bibliotheken auch zusammenarbeiten, die mit Sicherheit auch in paar Jahrzehnten noch keine Möglichkeit haben, ihre eigenen Digitalisierungskonzepte zu entwickeln. **I: Also ist es für sie wichtig, eine Plattform zu haben, die ihnen die Sicherheit garantiert, dass dort all ihre Daten sicher liegen, die Verbindungen da sind und das gibt es bisher noch nicht.** B: Ja. Also das finde ich wichtig. Ja. Schien mir auch irgendwie zentral zu sein für den ganzen, für das ganze Projekt. Oder? **I: Also es ist ein zentrales Konzept. Klar. Wo sehen sie noch die größten Schwierigkeiten? Oder was fehlt ihnen daran noch am meisten?** B: Weiß ich jetzt nicht. Kann ich jetzt so... Also bevor man irgendwie noch rummäkelt und irgendetwas anderes haben will, muss man ja erst einmal das ausprobieren, was es gibt. Also... Ja. Fällt mir jetzt gerade nichts ein. **I: Ok. Gut. Vielen Dank.** B: Keine Ursache.
