# Supplementary material
Source: publisher site journal article supplement (https://www.degruyterbrill.com/publication/isbn/9783110463927/downloadAsset/9783110463927_Interviews.zip)
Supplement: Supplementary file 7 [file I15.pdf › Interviews/I15.pdf]

**I15-1#Interviewer: Ok. Zunächst würde ich gerne klären, welche EDV-philologische Erfahrung sie mitbringen, inwiefern Sie in dem Bereich arbeiten und was sie da machen.**

Befragte/r: Also ich arbeite jetzt schon seit 5 Jahren beim P-Projekt in B und zunächst in C. Und da geht es eigentlich um eine überlieferungsgeschichtliche Edition, die auch online erscheinen soll – also hybrid, zum Teil im Druck und zum Teil online. Und das ist eigentlich die erste Erfahrung, die ich mit EDV-Philologie gemacht habe. Und wir haben von Anfang an begonnen, mit TUSTEP zu arbeiten und so unsere Daten zu erfassen und die Daten eben ordentlich auszuzeichnen. **I: Ja also vor allem TUSTEP zunächst.** B: TUSTEP war eigentlich das Hauptprogramm. Also es gab dann noch... – eine zeitlang war Collate beteiligt. Das verwenden wir aber jetzt momentan nicht mehr. **I: Ja. Warum?** B: Weil Collate eben nicht mehr für die neueste Mac-Version erhältlich ist, aber auch weil wir beim Kollationieren herausgefunden haben, dass das doch ein so spezielles Problem ist, dass eben manche Sachen einfach von Hand zu machen sind. Ja? **I: Haben Sie schon mit XML-Editoren gearbeitet?** B: Ja. Aber ganz einfach. Also nicht... Also nicht in Erschöpfung aller Funktionalitäten, sondern einfach um einen Editor zu haben, wo man seine Dokumente öffnen kann. Also...

**I15-2#I: Mit welchen Erwartungen sind sie dann zu dem TextGrid-Workshop gekommen?**

**Was haben sie sich erhofft?** B: Gute Frage. Ja also mit eigentlich keinen richtigen Erwartungen. Ich wusste zwar schon ungefähr, was es sein soll. Aber ich hatte eben keine Ahnung, wie weit man jetzt ist und was das schon alles kann. Und ich habe mich eher überraschen lassen eigentlich.

**I: Und gab es etwas, was sie überrascht hat?** B: Ja, also... Kann man schwer sagen. Also ja...

Also das grundsätzliche Problem ist eben, dass wir momentan unsere Daten noch nicht unter TEI haben. Und dadurch ist es eben recht schwierig, da abzuschätzen, was man selber brauchen kann.

Der erste Eindruck war jetzt offen gestanden nicht so, dass man..., dass ich mir jetzt gedacht habe: Da müssen wir unbedingt jetzt sofort konvertieren, weil wir damit jetzt anfangen. Aber mir ist das natürlich klar, dass das eben mit der Zeit erst alles kommt. Und ja... **I: Ja, was TEI-Standardisierung angeht. Sehen sie da die zukünftige Entwicklung? Also dass sie sagen: Früher oder später müssen wir standardisieren? Und würden dann eben die Voraussetzungen anders aussehen, unter denen sie sagen würden: TextGrid ist etwas Interessantes für uns?**

B: Also früher oder später sollten wir es auf jeden Fall. Ich weiß nicht... Ich glaube schon, dass es eine sinnvolle Sache ist und auch unterstützend. Und... ja... und ich hoffe wir werden es auch irgendwann tun.

I15-3#Ja, TextGrid momentan eben ist noch nicht so, dass ich mir denke: Das ist jetzt etwas, was uns viel weiterhelfen würde. Aber ich denke mir, dass es durchaus, wenn es mehr Funktionen gibt, dass es dann sicher das eine oder andere dabei sein könnte, was wir auch brauchen. **I: Was würden sie denn als wesentliche Funktionen ansehen, die noch zu entwickeln wären? Also aus ihrer Sicht.** B: Eben in der jetzigen Phase wäre es gut, einerseits einen vernünftigen Normalisator zu haben, also der normalisierte Texte irgendwie herstellt oder dabei hilft. Weil wir ja... Wir haben so Fassungseditionen und gehen an sich nach Leithandschriftenprinzip vor, aber, natürlich, haben gewisse wortgraphische Vereinheitlichungen, wie es ja üblich ist bei älteren Texten. Und da wäre es gut, einen... Ja. So genau weiß ich das auch nicht, was eigentlich das ist, was wir brauchen. Aber da würde es vielleicht die Arbeit erleichtern, wenn man... Wenn es da ein Programm gäbe, das zum Beispiel schon vorschlägt, welche Formen... Also das Wörter erkennt und vorschlägt, welche Formen dann zur Normalisierung eingesetzt werden müssen. Und vor allem dadurch, dass wir drei Leute sind, die an diesen Fassungstexten arbeiten, natürlich auch eine Standardisierung, damit man weiß: Was hat der andere für Regeln beachtet? Und dass man das irgendwie abstimmt. **I: Also Normalisierung in dem Sinn, dass es verschiedene Varianten von Wörtern gibt, die dann auf eine Form im Sinne eines gemeinsamen Nenners gebracht werden? Das heißt, es müsste ja eigentlich eine Datenbank dahinter stehen, die alle Varianten hat und eine entsprechende Normalsprache dann, die zu einer Normalform verknüpfen.** B: Eben. Und diese Datenbank könnte sich auch während der Arbeit aufbauen. Dass man eben immer noch sieht: Was wurden bisher für Entscheidungen getroffen? Und diese gibt es zur Auswahl. Und dass man eben auch aufmerksam gemacht wird: Das ist jetzt was Neues. Und das hat bis jetzt noch niemand so gemacht. Das wäre vielleicht etwas, was die Sache einfacher macht. Und dann wäre natürlich trotzdem auch immer noch so ein Kollations-Programm ... wäre immer noch brauchbar, wobei eben... Das große Problem, glaube ich, ist, dass eben immer, wenn es nicht sehr speziell auf die typische Edition ausgerichtet ist, wird es schnell unpraktisch. Und dann überlegt man sich, warum man es nicht schon eben von Hand macht. Ja? **I: Also wäre ein Kollationierer besser, der anpassbar ist an das jeweilige Projekt.** B: Das wäre natürlich ein sehr guter. Aber es ist wirklich noch die Frage, weil man es ja auf tausende denkmögliche Arten machen kann, so eine Edition. Und das... Ich denke mal das... **I: ...ist technisch schwer umzusetzen.** B: ... ist schwer umzusetzen. Ja.

**I15-4#I: Ja, gab es denn Funktionen in TextGrid, die für sie völlig neu waren? Von denen sie überrascht waren, dass es sie gibt?** B: Naja. Nicht unbedingt. Also das hat man sich schon

vorstellen können, dass man ein Wort markiert und dann wird es nachgeschlagen. Also das denkt man sich schon, dass so was geht. Ja. Lemmatisierung ist schon ein bisschen interessanter, aber für uns eben auch nicht wirklich brauchbar. Weil wir eben mittelhochdeutsche Lemmatisierung bräuchten und das wäre natürlich dann auch wieder bisschen... Macht die Sache wieder komplexer. Ja? **I: Ja. Also ist für sie der Punkt wichtig, dass man etwas an das spezielle Projekt anpassen kann – also Individualisierbarkeit.** B: Ich denke doch, eben das waren unsere Erfahrungen eigentlich mit Collate. Das ist an sich sicher ein gutes Programm. Aber es ist doch dann offensichtlich doch nicht speziell genug, um das wir es dann wirklich als brauchbar gefunden haben. Wir haben zum Beispiel jetzt zwei Apparate. Wir haben auch lange experimentiert mit den Apparaten. Und da hört es an sich schon auf – und solche Sachen. Ja?

**I15-5#I: Gut. Dann zum nächsten Punkt, der da heißt: Stellen mit Problemen. Also an welchen Stellen sind sie hängen geblieben? Jetzt einfach von der Bedienbarkeit des Ganzen oder...** B: Also die Bedienbarkeit macht..., war durchaus gut. Im... Manchmal hat man schon das Gefühl, da sind halt noch Bugs drinnen. Ja? Und dann... Was mir schon auch aufgefallen ist: Es wirkt recht langsam. Also es waren doch noch geringe Datenmengen, die wir da hatten, in dieser Beispieldatei. Und es hat doch so ein bisschen gebraucht und so. Ich weiß nicht. Das wäre vielleicht etwas, was noch verbesserungswürdig wäre. **I: Ja. Also zum Beispiel in welcher Geschwindigkeit Rechercheergebnisse geliefert werden.** B: Genau. Ja. **I: Aus dem Wörterbuchnetz heraus?** B: Gute Frage. Also dass das Wörterbuch natürlich ein bisschen dauert, das ist klar. Aber es waren auch andere Sachen, die mir aufgefallen sind, dass sie etwas länger brauchen. Ja?

**I15-6#I: Was ich hier im Fragebogen sehe, was sie auch eher als nicht so gut ansehen, sind jegliche Helfemeldungen beziehungsweise Hilfsfunktionen, die das Lab bietet. Also an Stellen, an denen man nicht gleich weiß, was man da tun soll. Hier sind zwei Punkte, die haben sie angekreuzt. Da haben sie angekreuzt, das war nicht so... Können sie sich noch daran erinnern, was das genau war? Wo sie Hilfe gebraucht hätten?** B: Gute Frage. Ich glaube, es ist eher so, dass wenn man irgendwo eben... also wenn eine Fehlermeldung kommt, dass man dann nicht weiterkommt. Das war es, glaube ich, was... **I: Dass sie aus der Fehlermeldung dann nicht schlau ...** B: Ja. Ja. Was hat man jetzt falsch gemacht – zum Beispiel. **I: Ja. Gut.**

**I15-7#Ja, und die Datenbestände, die das Lab bietet, haben ihnen auch nicht sehr viel bei ihrer Arbeit und Aufgabe geholfen. Können sie da noch mal kurz was dazu sagen?** B: Ja. Ich

meine, man nimmt natürlich das mittelhochdeutsche Wörterbuch selbstverständlich. Das ist natürlich klar. Aber eben das kann ich auch im Netz haben und dazu brauche ich TextGrid nicht, habe ich mir gedacht. Ja? Also natürlich ist das Wörterbuch eine großartige Sache. Das ist gar keine Frage. Aber jetzt... Ich hatte nicht den Eindruck, das ist etwas, wozu ich TextGrid unbedingt dazu brauche. Ja? **I: Ok. Gut, auf Funktionen sind wir jetzt schon eingegangen, da haben sie auch angekreuzt, dass sind nicht unbedingt die, die sie für ihre Arbeit brauchen. Haben wir ja eben gerade darüber gesprochen. Ich nehme an, das war das, was sie gesagt haben.** B: Ja. Genau.

**I15-8#I: Gut. Dann weg vom konkreten TextGrid-Lab, zu dem Stichwort eHumanities. Darunter wird ja verstanden, eine Infrastruktur aufzubauen, in den Geisteswissenschaften – digitale Infrastrukturen. Darunter kann man ja beispielsweise verstehen: eine Vernetzung von Inhalten, aber auch eine Vernetzung von Arbeitsprozessen – also Kooperation, Kollaboration. Können sie dazu sagen, wo sie die Potenziale sehen? Für wie wichtig sie das halten? Also zuerst mal bei dem Punkt Kollaboration, also Zusammenarbeit über eine digitale Infrastruktur – aus ihrer Perspektive?** B: Ja. Ja, ich meine, das eine Problem ist, denke ich, wie überall bei den besten Computersachen, ist eben einerseits: Wo ist jetzt nur Standard und wo braucht man aber Lösungen, die spezifisch sind für Projekte. Und das ist, finde ich, das große Problem, das eben auch den Kooperationen gewisserweise immer im Weg steht. Weil, wir machen zwar eben... Also ich denke wir produzieren mit unserem Projekt relativ viel Know How, aber die Frage, wem das jetzt weiter nutzen kann. Das ist irgendwie schwierig, kommt mir vor – oder zumindest, ja, es ist schon ..., es gibt schon irgendwelche Musterlösungen, aber sie sind dann..., ist die Frage, ob jemand anderes außer uns [Anonymisierung: P-Editoren] jemals so eine Darstellung zum Beispiel brauchen, oder wieviele zumindest – also vielleicht eher eben altgermanistische Projekte schon vielleicht, aber eben wie weit das übertragbar ist und inwieweit das eben..., also inwieweit man das Wissen irgendwie gewinnbringend weitervermitteln kann oder gewinnbringend austauschen kann. Auch weil ja diese Projekte eben alle sehr speziell sind und sehr spezielle Anforderungen haben. **I: Also wenn man jetzt eine Standardisierung über TEI hätte und andere darauf zugreifen könnten. Auf diese Weise, denken sie, dass das sehr speziell annotiert ist, bearbeitet ist. Oder?** B: Also die Annotation, das ist eben dank TEI doch durchaus auszusparen. Nur eben diese spezielle Darstellungsweise, die wir haben, eben mit diesen Fenstern und so. Das ist halt die Frage, ob das jetzt wirklich jemand... ob also... Das Schöne wäre, wenn man Texte einfach da in diese Maske

eingießt und dann spuckt..., wird eben in kürzester Zeit das fertige Ergebnis ausgespuckt. Und das, denke ich, das wird wahrscheinlich nicht so die Wahrheit sein, weil eben, wir eben bei unserem Projekt sehr stark gesehen haben, dass wir ausprobieren müssen und dass wir wirklich unsere spezielle Darstellungsform eben finden müssen, die dem Text und der Überlieferungslage angemessen ist. Ja.

**I15-9#I: Gut. Da ist ja jetzt der Bezug zur Vernetzung von Inhalten praktisch schon gegeben. Aber man kann das ja auch so denken, dass beispielsweise Vernetzung mit anderen Projekten, die in eine ähnliche Richtung arbeiten, möglich wäre, oder die Verknüpfung von Inhalten beispielsweise, Verknüpfung von Wörterbüchern, aber auch Verknüpfung von bearbeiteten Texten oder Textpassagen. Wo sehen sie da Möglichkeiten? Sehen sie da dieselben Probleme, wie bei der Kollaboration? Oder...**

B: Naja. Also da ist, denke ich, das Problem, dass man, solange man..., zumindest solange man an einer Sache arbeitet, diese Dinge nicht gerne aus der Hand geben möchte. Also ich denke, wenn wir jetzt anfangen würden, unsere Transkriptionen einfach so, jetzt bevor das Projekt jetzt fertig ist, praktisch schon OpenSource unter die Leute zu schmeißen, da hätte man vielleicht Bedenken. Ja? Ist vielleicht auch noch sehr altmodisch gedacht, aber es ist ein bisschen das Problem eben, dass eben Online-Ergebnisse in der Wissenschaftswelt eben noch nicht so anerkannt wie zum Beispiel Print-Publikationen... Und daher kann man jetzt auch nicht sagen: Hey Leute! Wir haben das jetzt erfasst und transkribiert und das ist jetzt unsere Leistung und deswegen... und wir geben es euch jetzt weiter einfach. Aber es ist ganz klar, das ist jetzt unsere Leistung. Also man hat dann immer schon dieses schlechte Gefühl, dass es dann nicht mehr als Punkt in der Liste sozusagen wahrgenommen wird. Ne? **I: Ja das ist ja auch eine Hürde. Das ist nicht unbedingt altmodisch gedacht. Ich denke das gibt es oft, dass Wissenschaftler sagen: Ich möchte mein Wissen nicht einfach so jetzt ins Netz stellen, oder ins Grid stellen. Ja. Wie sehen sie da die Problematik? Ist das noch sehr stark vertreten? Oder denken sie, ist das jetzt nur so, dass sie es nicht zu früh, wenn es noch nicht zu Ende gearbeitet ist, reinstellen?**

B: Ich denke zu früh. Ja? Also eben... Wir wollen ja dann, also wenn man auch schon einen exklusiven Zugang zum Material hat, dann ist ja auch ganz nett, dann daraus gleich mal Forschungsfelder abzustecken – und was darüber zu arbeiten und so. Aber gut. Das war jetzt eigentlich auch das, was passiert ist während der ersten Projektphase bei uns. Und also der Kollege und ich haben jetzt Dissertationen zur Überlieferung gemacht, die jetzt eben aus dieser leicht privilegierten Situation heraus entstanden sind. Und dann natürlich... und wir zum Glück eben in vielen Sachen

die Ersten waren sozusagen, die das gut überblicken konnten. Das sind natürlich... Eben das ist natürlich schon praktisch und dann denkt man sich: Ja. Gibt man das jetzt allen? Gleich? Ja? Also man möchte zumindest, wenn man sich schon die Mühe macht, diese Handschriften abzutippen, dann möchte man zumindest einige verwertbare Ergebnisse daraus ziehen und nicht nur als Handschriftenabtipper in die Geschichte eingehen, sondern eben auch als der, der das Material durchdenkt und durchschaut. Und... Also... Was eben schlecht wäre, wenn man wirklich die Transkriptionen gerade gemacht hat und wenn man sie freigibt und dann kommt er Nächste und arbeitet dran – mit der Zeit, die man nicht hatte, weil man eben diesen Text erstellen musste erstmal. Ja? Das ist, denke ich, was einen noch zurückhaltend macht bei der Freigabe der Daten.

**I15-10#I: Ja. Aber sie haben jetzt einige Punkte genannt, die sie eher skeptisch sehen. Wenn sie Teil einer solchen Community wären, gibt es denn auch Punkte, aus denen sie glauben, einen Vorteil ziehen zu können? Wenn sie einer solchen Community angehören?** B: Ja. Das... Also ich sehe ja, die Standardisierung mit TEI zum Beispiel ist ja schon ein Vorteil. Also dass, wenn man jetzt TEI als Community sieht, dass man sich hier einigt auf Standards, die dann wirklich dazu führen können, dass die Langzeitarchivierung wirklich funktioniert. Das ist natürlich schon eben ein Vorteil, den diese Vernetzung hat. Standards haben durchaus Vorteile. Ja?

I15-11#Und eben bei TextGrid, denke ich, muss man mal abwarten, welche Vorteile man daraus ziehen könnte. Also es ist für uns jetzt nicht unbedingt wesentlich, andere Texte zur Verfügung stehen zu haben. Oder nicht so wesentlich, wie wahrscheinlich für einen Sprachwissenschaftler, den das natürlich sehr interessiert. Aber bei uns geht es eben um die [Anonymisierung: P-Überlieferung] und haben wir praktisch alle Texte, die wir brauchen. Also so gesehen wäre es jetzt nicht der inhaltliche Austausch... also nicht vielleicht das, wovon man sich am meisten erwarten würde. Also wenn es natürlich jemanden gäbe, der gute Programme macht, die man wirklich anwenden kann, auch in Spezialfällen, das wäre natürlich ein Gewinn. Ja? Irgendwie glaube ich noch nicht ganz daran, dass das eben wirklich funktioniert. Ja? Weil es wirklich, glaube ich, extrem schwierig ist, das wirklich so flexibel zu machen, das wirklich jedem zugute kommt.

**I15-12#I: Inwiefern sehen sie Möglichkeiten, mittels digitaler Werkzeuge beziehungsweise Vernetzungen von Inhalten oder auch sonstwie, neue wissenschaftliche Erkenntnisse zu erlangen, die auf konventionellem Wege nur schwer erlangt werden können oder eventuell gar nicht?** B: Naja. **I: Sehen sie da welche?** B: Ja, also, natürlich doch. Gerade jetzt bei uns

wäre die Überlieferung kaum zu überschauen gewesen, wenn man es nicht irgendwie elektronisch, zumindest durch verschiedene Vergleichsprogramme durchrennen lassen kann. Und auch in der Darstellung: Die Online-Darstellung bietet sicher einen sehr guten Überblick über die Überlieferung. Ist auch methodisch sicher anregend, weil sie eben die Vorteile von Rekonstruktion und Überlieferungsnahe Edieren verbindet. Also natürlich: Ich denke, von einem konkreten Fall aus geredet, gibt es da sicher Erkenntnisse, die eigentlich sonst nicht möglich wären. **I: Ja. Können sie da vielleicht noch Beispiele nennen?** B: Ja. Man braucht sich eben nur den P anschauen, der im Prinzip 150 Jahre nicht bearbeitet worden ist – was die Überlieferung betrifft. Und jetzt sind wir da und haben in relativ kurzer Zeit, dadurch, dass wir eben mit diesen elektronischen Sachen Vergleiche ziehen können zwischen den Handschriften, Transkriptionen, haben jetzt doch in relativ kurzer Zeit einen genauen Blick auf die Überlieferung werfen können sozusagen – Ja? – und da ein bisschen Klärung reingebracht, würde ich mal sagen. **I: Ja. In dem Sinne, dass mehrere Versionen verglichen worden sind, oder wie funktioniert das dann real?** B: Ja. Wir haben zunächst mal, glaube ich, ist es uns schon auch vor allem wegen der Technik gelungen, die Überlieferung vernünftig zu gruppieren. Also wir haben jetzt vier Fassungen, auf die sich..., unter denen sich sehr viel bündeln lässt – und was wiederum dann eine leichtere übersichtlichere Darstellung ermöglicht. Ja. Und das ist schon eben leichter, wenn man... Man muss zuerst eben die Transkriptionen erst machen, aber wenn man dann das durch ein Vergleichsprogramm durchlaufen lassen kann, das dann zeigt: Wo sind die Unterschiede? Das hilft dann schon bei der..., um die Gruppierungen dann wirklich genauer festzulegen. Und dann. **I: Heißt Gruppierungen in eine Reihenfolge bringen, oder...?** B: Also zumindest welche Handschriften näher beisammen sind – ganz einfach. **I: Also ist das auch eine Form des Sichtbarmachens. Sie sagen: ...eine Übersicht kriegen. Oder wie muss man sich das genau vorstellen? Also eine Ordnung?** B: Ja. Also einerseits eben. Man kann ja... Also zumindest eine Zuordnung zu diesen Fassungen, die eben einerseits hilft, so ungefähr zu verstehen, wie der Entwicklungsprozess gelaufen ist und andererseits kann man die Fassungen selber sichtbar machen, indem man sie eben per Internet darstellt und wirklich auch die richtigen Handschriften zu den richtigen Gruppen zusammenfügt. Und dann. Ja.

**I15-13#I: Also dann kann man bei diesem Vergleich auch praktisch mit digitalen Mitteln eine Mustererkennung oder Erkennung von Zusammenhängen, oder ...?** B: Ja. Also, also was wir eben schon noch eingesetzt haben, war dieses SplitsTree. Das ist so ein Programm, das eigentlich aus der Evolutionsbiologie kommt und das so praktisch Übereinstimmungen im

Phänotyp auf Graphen umrechnet, die die Entfernung dieser einzelnen Spezies sozusagen graphisch darstellt. Und schon da kann man gut erkennen, welche Handschriften eigentlich ungefähr in welche Gruppierung... Und... **I: Ist ja eine Visualisierung.** B: Ja, eine Visualisierung. Ja. Ja. Und ohne dass man jetzt im klassischen Sinne ein Schema aufstellen muss, wo man sagt: Das ist dann wirklich der Ausgangspunkt, sondern wirklich nur die Näheverhältnisse praktisch zum Ausdruck bringt. Und dann kann man natürlich auch versuchen, die Varianten, die man aus den Transkriptionen zum Beispiel mit TUSTEP herauszieht und praktisch in synoptischer Darstellung dann sich ansieht, kann man dann..., stellt man dann fest: Aha, hier gibt es diese Fehler im klassischen Sinne der Textkritik, die eben für Zusammengehörigkeit sprechen. Und man kann, was ja auch in der P-Überlieferung das Problem ist, dass diese Gruppenzugehörigkeiten zum Teil sehr stark wechseln. Und das kann man eben auch für verschiedene Teile sehr gut genau bestimmen. **I: Ah ja. Interessant. Also wären solche Visualisierungsmöglichkeiten ja auch ein sinnvolles Werkzeug, das eventuell..., ob es jetzt durch TextGrid oder sonstwie geboten wird, auch aus ihrer Perspektive nützlich werden.** B: Ja durchaus. Sicher. Also man könnte sich wirklich auch überlegen, ob man praktisch so eine Art Variantenrechner irgendwie auch mal konstruiert, der das so praktisch aus relativ unbekannten Überlieferungen anhand von gewissen Variantengruppen Beziehungen errechnet. Das wäre sicher interessant. Ja.

**I15-14#I: Gut. Ja. Abschließend. Die Frage stelle ich immer. Was sehen sie als das größte Potential von TextGrid an? Und was sehen sie noch als größtes Manko an? Also wo sehen sie einen Fortschritt oder gute Möglichkeiten? Und was sehen sie als größtes Problem?** B: Also das Potential wäre natürlich die Vernetzung. Das ist ganz klar. Also die multiplizierten Kräfte der Community zu nutzen, das wäre sicher das größte Potential, denke ich. **I: Was sie aber als schwer umsetzbar betrachten.** B: Ja. Also eben. Ich bin gespannt. Aber teils kann ich es mir nicht... also... ja, mal sehen, würde ich mal sagen. Ja? Ich meine, es ist natürlich... es gibt natürlich auch dann diese letztlich, wie soll man sagen, auch schon strategischen Begehrlichkeiten und so. Dass man immer auch Angst hat, dass es jetzt irgendwie ein Zentrum gibt und man ist irgendwie außen vor. Und das ist eben sicher auch das, wovor viele Hemmungen haben, jetzt zu sagen: Ja, wir freuen uns, dass es TextGrid gibt, sind aber nicht dabei sozusagen, oder fühlen uns nicht als dabei. Das ist, was dem eher entspricht. Und das ist vielleicht wirklich ein Problem des Wissenschaftsbetriebes. Eben diese Sache... Ja ich meine eben, allein wenn man mit jemand anderen einen Aufsatz schreibt, ist es ja schon irgendwie fast problematisch, weil es



nicht soviel zählt, wie wenn man es alleine tut. Obwohl es ja eigentlich eine viel größere Leistung ist sozusagen. Also das ist sicher etwas, was es zu überwinden gilt. Und die Frage ist nur: Wie? Ja? **I: Ja.** B: Ja. **I: Gut. Dann herzlichen Dank.** B: Ebenfalls Danke.
