# Supplementary material
Source: publisher site journal article supplement (https://www.degruyterbrill.com/publication/isbn/9783110463927/downloadAsset/9783110463927_Interviews.zip)
Supplement: Supplementary file 8 [file I16.pdf › Interviews/I16.pdf]

**I16-1#I: Gut. Die Aufnahme läuft. B: Gut. Jetzt geht es los. I: Ja. Genau. Zunächst würde ich gerne wissen, wie sie ihre EDV-philologische Erfahrung und Tätigkeit beschreiben würden, also was sie genau in dem Bereich machen – EDV-gestützte philologische Arbeit.**

B: Das ist sehr verschieden gestaltet. Ich arbeite selber aktiv im Moment nur an..., also digital-philologisch letztlich nur an papierorientierten Editionen. Im Moment mit Latex, was in der Beschreibungssprache ohnehin schon ein bisschen also SGML-Vorform ist – so ein bisschen, aber eben doch auf Papierformatierung ausgelegt ist. Ich war aber immer schon neugierig auf TEI, andere Konzepte usw. Meine anderen Erfahrungen, oder meine anderen Arbeitsschwerpunkte gehen im Moment in die Richtung „digital born documents“ und die Analyse von zukünftigen Archivaria, die eben nur in digitaler Form eigentlich vorliegen. Das ist eine Sache, die ich mir gerade als Schwerpunkt erarbeite. Ja, das sind so die drei Felder. **I: Und mit welcher EDV haben sie da bisher gearbeitet. Mit welcher Technik? Mit welchen Programmen?** B: In allen drei Bereichen? **I: Ja. Einfach, dass man ein bisschen Überblick hat, wie ihr Hintergrund da ist.**

B: Ach so. Also im papierorientierten Bereich habe ich mit ziemlich allem gearbeitet, was es gibt. Also mit normalen Textverarbeitungen: von altem Word oder Open Office über Latex über Indesign mit allen auf TEI-Basis, habe bisher, wenn ich Versuche in TEI gemacht habe, also eigentlich nur so Umsetzungsversuche vom Manual aus. Weil probiert etwas zu schreiben, bin ich eigentlich immer bei ganz normalen einfachen XML-Editoren geblieben, also wie Copy-XML, also Copy-XML benutzt. Also meine Linuxvorliebe ist da wieder im Spiel. Und bei der Arbeit mit digital vorliegenden Archivaria bietet sich sowieso ein Mix an. Das sind alle möglichen Tools, die man braucht, um doch Dokumente auf Binärbasis letztlich zu analysieren. Also X-Editoren aller Couleur. Es ist fast wurscht, was man da benutzt.

**I16-2#I: Und was für eine Erwartung hatten sie dann an TextGrid? Mit welchen Erwartungen sind sie in diesen Workshop gekommen?** B: Mit... Also das sind zwei verschiedene Fragen, die brauchen auch zwei verschiedene Antworten. Also meine Erwartungen an TextGrid als einer Plattform und Art Verkörperung einer Arbeitsumgebung für zukünftige Editionen, daran hege ich große Erwartungen. Und ich war, mit Bezug auf diesen Workshop, erst einmal gespannt, wie weit es die Entwicklung mit Blick auf eine praktikable Umsetzung, was einen Workflow vom vorliegenden Archivarium über das Eingeben, über das Kollationieren bis hin zu einer Repräsentation am Bildschirm für einen Leser, wie weit das ist. Weil mir bis dahin nur eben nur – wie soll ich sagen – TEI-Konzepte vorliegen oder vorlagen, und ich einerseits die

Sachen sehr im Fluss sah und mich immer fragte: Ok, wenn ich jetzt TEI-Code geschrieben habe, habe ich TEI-Code. Aber das kann ich doch keinem Leser zeigen.

**I16-3#I: Ja. Und sind ihre Erwartungen eher enttäuscht worden, oder wie würden sie den Stand der Entwicklung sehen, wie sie ihn auf dem Workshop jetzt kennengelernt haben?** B:

Also ich war zuerst einmal beeindruckt von der Breite des Ansatzes. Also ich denke, dass die..., dass es ein natürliches Zwischenstadium eines Großprojektes ist, mit dem wir es da zu tun hatten. TextGrid-Lab ist ein sehr mächtiges Eingabetool mit einer ganzen Reihe von geplanten Komponenten und schon verwirklichten, oder im Ansatz verwirklichten Komponenten, die auf eine Größe eines Arbeitszusammenhangs hinarbeitet, die mir nicht nur angemessen, sondern beinahe etwas gigantisch erscheint. Also was mich dabei... also ich denke, dass es genau richtig ist, dass zum Beispiel Workflow-Tools geplant sind und dass bereits projektförmiges Arbeiten mitgedacht ist, dass TextGrid-Lab ein Tool ist, das grundsätzlich, dass es nicht nur ein XML-Editor ist, wie das, was wir zuerst vor allen Dingen sehen, sondern ganz..., dass der Trick bei..., oder dass der Gedanke bei TextGrid-Lab ist, dass Zusammenarbeit koordiniert wird und auf einer gemeinsamen Datenbasis geschieht. Und das ist grundsätzlich. Und das ist spannend.

**I16-4#I: Sie sagten gerade... Stichwort: Workflow. Das hatten sie auch hier im Fragebogen als wichtigen Punkt erwähnt. Wie würden sie sich das genau vorstellen? Was muss da so was bieten – ein Workflow-Tool?** B:

Tja. Das ist eine gute Frage. Ich habe auch noch mal versucht auf der Website darüber schlauer zu werden. So richtig schlau bin ich noch nicht geworden. Ein Workflow-Tool? Ja. Also das ist jetzt schwierig, das zu beschreiben, weil ich, glaube ich, wie viele andere Workshop-Teilnehmer, noch Schwierigkeiten habe, im Kopf genau zu verorten, wo die Grenzen zwischen TextGrid-Lab und der serverseitigen TextGrid-Implementation eigentlich genau liegen. Also wo gehen zum Beispiel Texte hin, wenn sie irgendwo hingespeichert werden? **I: Also die Schnittstelle zum TextGrid-Repository?** B: Genau. **I: Und wie das genau...** B: Genau. Und von daher... Und deswegen habe ich jetzt auch gerade Schwierigkeiten mir vorzustellen: Wo sitzt dieses Tool? Sitzt es in TextGrid-Lab, oder sitzt es eigentlich serverseitig?

**I16-5#I: Ah ja. Das ist noch abzuwarten, wie das nachher genau ausgeprägt ist. Der Grundgedanke war ja, dass eben verschiedene Funktionen miteinander, von Nutzerseite aus verschaltet werden können. Angepasst an die jeweilige Arbeit, an das jeweilige Projekt.**

B: Ja. **I: Also mich würde jetzt interessieren: Was bräuchten sie? Was wäre für sie eine sinnvolle Funktionalität?** B: Ja. Wenn ich so ein... Also ich bin nicht in so einer Situation. Aber

wenn ich ein solches Projekt zu verantworten hätte oder zu koordinieren hätte, würde ich ein Tool sehr schätzen, das serverseitig funktioniert, mir die Möglichkeit gibt, zu definieren, welche Mitarbeiter in welcher Reihenfolge bestimmte Aufgaben oder Aktionsschritte zugewiesen bekommen, dass ich diesen Prozess automatisieren kann und zum Beispiel auch Parallelzugriffe schalten kann. Und dass auch durchaus die..., also dass ich auch eine richtige Zugriffskontrolle kriege, dass Leute zu einem bestimmten Zeitpunkt an die Texte nicht dran können. Was nicht so sehr diktatorisch gedacht ist, sondern mehr mit der Begrenzung des Selbstausdrucksbedürfnisses von Geisteswissenschaftlern.

**I16-6#I: Ah ja. Damit ist ja ein wichtiger Punkt angesprochen, der ein zentrales Konzept bei TextGrid ist, nämlich die Kooperation über digitale Infrastruktur. Inwiefern üben sie das derzeit aus, vielleicht mit anderen IT-Möglichkeiten – also dezentrale Kooperation?** B:

Ja. Ich habe vier Jahre mit Groupware-Tools gearbeitet, hier an der Uni H. Also ich habe sie mitadministriert und mit aufgebaut. Eines hieß GSD Litwiss Grundstudium Literaturwissenschaft basierend auf dem Konzept E-Port. Und der nächste Schritt war – wie soll ich sagen – die Beteiligung an der Evaluation des Tools CommSy, das hier von der Uni H auch entwickelt wurde. Das ist ein OpenSource-Tool, kann jeder benutzen. Und wir haben dann die Plattform mit dem Namen Agora hier aufgesetzt. Das sind die beiden Tools, mit denen ich vorwiegend gearbeitet habe. Ich habe auch ein paar andere kennengelernt. Aber, um noch mal zu der Frage zurückzukommen. Ich fange jetzt erst einmal an, welche ich kenne und mit welchen ich arbeite.

**I: Wie bisher ihre Zusammenarbeit über IT-Strukturen aussieht.** B: Ach so. Genau. Das sind... also genau, darüber kann man dann anschließen, die ... Das sind beides Tools, die anders funktionieren als TextGrid bisher und auch als das, was ich eben beschrieben habe. Es sind nämlich im Wesentlichen Tools, die Funktionen von – wie soll ich sagen – attachmentbasierten Repositories und Forenstrukturen, die das miteinander verknüpfen. Das hat für die Geisteswissenschaften, gerade für den Lehrbetrieb eine wichtige Funktion und kann auch sehr fruchtbar gemacht werden, ist aber auch, was Versionierungskonzepte angeht, schwierig zu repräsentieren. Also man kann damit arbeiten, man kann auch versionieren. Aber es erfordert immer viel Umdenken mit den Konzepten für die beteiligten Mitarbeiter. Und das ist der Vorteil einerseits von einer automatisch versionierenden Repository-Implementation. Gleichzeitig gibt es natürlich einen Aspekt, den man so gerne bei TextGrid sozusagen mitdenken würde – von da aus: nämlich zum Beispiel Annotationen, kommentierungsbestimmten Textstellen, wo dann ein Mitarbeiter daneben schreiben kann: Kann ich nicht lesen. Weißt du es? Oder: Bist du dir sicher,

dass du das da gelesen hast? Oder: Das macht doch keinen Sinn! Oder: Hier fehlt ein Kommentar. Ja. **I: Also praktisch eine Struktur, die in den Prozess der Textbearbeitung eingebracht wird und in mehreren Versionen hintereinander geschaltet werden kann, dass man auch nachverfolgen kann: Wie ist das Ganze entstanden?** B: Ja. **I: Wäre das eine Zusammenfassung?** B: Ja.

**I16-7#I: Weil, das ist nämlich auch ein Punkt, also Versionierung, den sie hier aufgeführt haben, auf den ich gerne noch genauer eingehen würde, nämlich wie sie das... also welche Ausprägung sie davon als besonders nützlich ansehen würden? Versionierung ist ja so ein Stichwort, da kann man viel darunter verstehen. Aber wie stellen sie sich das genau vor?** B: Wie ich mir das genau vorstelle? **I: In dem TextGrid.** B: Ja. Genau. **I: Welche Vorstellungen sie dazu haben, wie das in TextGrid aussehen könnte, was TextGrid da als Fortschritt bieten könnte.** B: Als Fortschritt gegenüber anderen Lösungen oder als Fortschritt innerhalb der TextGrid-Entwicklung? Die kenne ich ja nicht genau genug. **I: Ja. Naja. Gut bisher war ja an Versionierung in dem Workshop noch nicht viel zu sehen. Besser gesagt: gar nichts.** B: Ja genau. **I: Ich würde eben gerne wissen: Wie müsste das für sie aussehen? Was verstehen sie unter Versionierung, wie sie für sie nützlich wäre?** B: Ja. Also da gibt es im Wesentlichen zwei Komponenten, die für mich wichtig sind. Das eine ist Versionierung im Sinne von: Wann wird eigentlich eine Version als Version erkannt und abgespeichert? Wo wird sie hinterlegt überhaupt? Für wen bleibt sie zugänglich? Und das andere ist: Was passiert mit parallelen, gleichzeitigen, synchronen Edits – wenn sie überhaupt möglich sind? Und zur zweiten Frage kann ich vielleicht zuerst sagen: Außer... Ich weiß nicht, ob TextGrid überhaupt solche Merging-Algorithmen – wie bei Wikipedia üblich – überhaupt verwenden sollte. So was macht nur Sinn bei Projekten, die so groß sind und die so schnell funktionieren müssen, dass tatsächlich die Leute gleichzeitig an denselben Textstellen arbeiten, was nicht unmöglich ist, weil es dann doch wieder... Also so wie ein Projekt läuft, ist es dann doch wieder so, dass es irgendwie manchmal drei, vier Mitarbeiter dann doch an derselben Handschriftenseite sitzen. Das kann dann schon mal passieren. Aber genau deswegen würde ich sagen, auch weil Merging-Algorithmen dazu neigen, syntaktisch zerbrochene Sätze zu produzieren, sollte man einfach mit einem Sperralgorithmus arbeiten und sagen: „Mitarbeiter so und so – arbeite du jetzt daran. Hier kann jetzt keiner ran.“ Das ist das eine, das andere: Versionierung, Abspeichern von Versionen. Das Ideal wäre, wenn jeder Edit protokolliert werden würde. Das wäre das Ideal. Und wenn dann sozusagen in einer Art Versionenbrowser übersichtlich gemacht werden würde, an welchen Stellen ungefähr im

Repository da gearbeitet worden ist und wohin man sozusagen, auf welchen Stand man sich da jetzt zurückbegeben möchte. Also da ich bisher Text... – also ich sage das nur deswegen, weil ich bisher TextGrid so auf der... Bis jetzt verstehe ich das Repository in TextGrid so, dass ich eigentlich nicht mit so ganz statischen Versionsbegriffen arbeite. Sondern es scheint eher um Edits zu gehen, die protokolliert werden. Aber ich kann das natürlich nicht genau sehen.

**I16-8#I: Und das wäre natürlich eine Möglichkeit. Also was mich noch interessieren würde: Da kommen ja dann verschiedene Arten von Edits auch zusammen. B: Ja. I: Ein Kommentar. Oder die Arbeit direkt am Text, wie auch immer, auch von verschiedenen Nutzern. Da besteht ja die Gefahr, dass das recht unübersichtlich wird. Wie stellen sie sich vor, dass man sich da die Übersicht in dieser Vernetzung behält? Weil es ist ja eine Vernetzung von Arbeitsprozessen, aber auch von Inhalten, die ja recht komplex werden kann. B: Die Übersicht in den Versionierungen? Oder in den Editionsarbeiten? I: Sowohl als auch. Also sie haben ja eben jetzt zum Beispiel gesagt, dass man das in der Browserübersicht sieht. Die verschiedenen Edits oder Versionen. Dazu kommen ja aber auch noch die Komponenten: Wer hat das bearbeitet? Und so weiter und so fort. Also es gibt ja verschiedene Kriterien, die damit verknüpft sind und... B: Also das ist jetzt mehr so eine generelle konzeptuelle Frage, wie man die Prozesse in TextGrid visualisiert? I: Ja, zum Beispiel. Genau. B: Auf dem Interface? Das ist eine gute Frage. Ich meine, es sind ja schon tolle Ansätze da. Ich meine, bemerkt zu haben, dass eine ganze Reihe von Konzepten, die in TextGrid-Lab eine Rolle spielen, eigentlich von Eclipse geerbt sind. Zum Beispiel das mit dem Projekt und so. Ich habe an mir selbst beobachtet, dass ich die Projektsemantik und einige daran anhängende Konzepte, die mit Eclipse zusammenhängen, dass die mir auf den ersten Blick fremd waren. Ich musste mich erstmal dran gewöhnen. I: Ja. Sie haben auch nicht mit Eclipse gearbeitet vorher? B: Ich hatte vorher mir Eclipse noch mal ganz kurz angesehen. Aber ich hatte bis dahin keinen großen Bedarf. Jetzt in der Folge bin ich darauf gekommen, dass ich Eclipse in diesem Latex-PlugIn benutzen könnte. Aber vorher bin ich da nicht drangekommen. Und es könnte sein, dass eine – wie soll ich sagen – Verständlichmachung der... Also ich glaube es braucht noch eine weitere Visualisierungs... Es braucht noch mehrere Visualisierungsebenen. So. Und ich bin mir nicht sicher, ob man mit der Projektmetapher im einzelnen da weiterkommt oder ob man vielleicht auf gängigere Konzepte, wie Ordnerstruktur – das kennt jeder von seiner Festplatte – ob man damit nicht vielleicht den Nutzern näher kommt oder ein stärkeres Angebot macht – oder etwas, was mehr aussieht wie eine Website, auf der sie etwas mit einer Suchfunktion suchen.**

Vielleicht macht es das den Leuten einfacher.

I16-9#Was ansonsten, was sie noch gesagt haben mit Text und Kommentar und so weiter. Das geht ja mehr sozusagen auf direkte Repräsentation auf dem Bildschirm. Interfacegeschichten. Ja. Da fiel mir zwischendurch mal ein, dass ich in TextGrid-Lab gerne etwas sehen würde, wie einen „What you see is what you mean“-Editor oder eine Komponente, die ähnlich funktioniert – also zum Beispiel Splitscreen: auf der einen Seite TEI-Code, damit man auch sauber schreiben kann und auf der anderen Seite entweder wenigstens ein Fenster, das einem sozusagen Klartext mit kommentierten Stellen und Varianten, Paradigmen anzeigt, die man gerade gespeichert hat, oder sogar eine Komponente, in der man sogar selber schreibend eingreifen kann, direkt hineinschreiben könnte. Das wäre toll. Ich glaube, das würde den, nicht nur den betagteren Philologen, sondern auch dem einfach pragmatisch orientierten Philologen entgegenkommen, die einfach eine Handschrift vor sich haben und das Bedürfnis haben, sie schnell nacheinander abzuarbeiten.

**I16-10#I: Stichwort Visualisierung. Sie haben mehrere Ebenen der Visualisierung erwähnt. Ich nehme an, sie meinen damit, die sich immer mehr annähern, auch einem weniger technikaffinen Nutzer. Mit solchen Visualisierungen, denken sie, da kann man auch komplexe Muster in großen Datenstrukturen sichtbar machen, die auch zur Erlangung wissenschaftlicher Erkenntnisse dienen könnten, die vielleicht durch konventionelle Methoden nicht erreichbar wären?** B: Ja. Glaube ich tatsächlich. Also ich weiß nicht, ob sie jetzt genau daran denken. Aber eine... **I: Ja. Mich interessiert, was sie in dem Zusammenhang damit verbinden.** B: Ja. Also eine... Aber das geht schon sehr weit. Also das ist eine... Wir haben es... TEI ist noch gar nicht so weit. Aber in TEI wird ja zum Beispiel an diesem Subset für textgenetische Auszeichnung gearbeitet. Diese Auszeichnungssemantik für TEI ist, zu meiner großen Freude und – wie ich glaube – sehr vernünftigerweise, zu bestimmten Anteilen relational angelegt. Das heißt, es geht immer wieder um: „vor das hier kommt nachdem“. Oder „das hier ist in derselben Textschicht wie“, „das ist ein Layer, und das ist aber... kommt nach dem und dem Ereignis“ zum Beispiel, oder ist fest, fix datierbar, an dem und dem Tag und so weiter. Diese Relationierungen... Also eine der anspruchsvollsten Aufgaben für Textgenetiker ist, immer wieder diese Masse dieser Daten aufeinander zu beziehen – sinnvollerweise. Und man vergisst immer etwas. Und natürlich wäre es, bei einer ordentlichen Auszeichnung dieser Relationen von Teilen untereinander, durchaus möglich, anhand dieses Modells eine textgenetische Repräsentation zu errechnen, die schlüssig ist, auf den Daten basiert, die eingegeben wurden, und

die über das hinausgeht, was man kodiert hat. Also das wäre ein echter Mehrwert. **I: Ja. Also da würde man ein Muster in diesem Kodierten erkennen, dass man erst durch diese digitale Draufsicht erkennen könnte praktisch.** B: Genau. Das könnte sozusagen, die genetische Abfolge könnte dann zum ersten Mal auch mit ihren, wie soll ich sagen, mit den Punkten, wo etwas genetisch zwischen zwei verschiedenen Punkten auch gleitet, errechnet und dargestellt werden. Also das wäre eine Chance. Und sie wäre riesig. **I: Interessant.**

**I16-11#Das, was sie in dem Zusammenhang noch auf dem Fragebogen eingetragen haben, nämlich... – ich weiß nicht, ob ich das damit richtig in Verbindung bringe, ob das was damit zu tun hat, was wir gerade besprochen haben – vereinfachte, kontextsensitive konfigurierbare Tagging Shortcuts in einem View für Editoren. Das haben sie hier auf ihrer Wunschliste geschrieben.** B: Darf ich das nochmal. Ich verstehe so schnell schon gar nicht mehr, was ich selbst geschrieben habe.... Ach so. Das ist etwas... Nein, das ist was ganz anderes. Das ist ganz einfach für... einfach, dass es bei der, wie soll ich sagen, TEI p5 Spezifikation, das hat 5300 Seiten. **I: Ah. Ok.** B: Und es wäre einfach hilfreich für jemanden, der mit TEI arbeitet, in dem Editor, mit dem er arbeiten muss, ein menügeführtes, gestütztes Hilffsystem zu haben, wo man die Tags sehr einfach wiederfinden kann. Und... **I: Ah ja. Wie zum Beispiel bei Oxygen. Schon so...** B: Ich habe Oxygen nie benutzt. **I: Ach so.** B: Aber ich kenne... Also ich meine bald jeder bessere Editor hat Snipit-Funktionen oder Autovervollständigen. **I: Ja. Ja. Die meine ich. Ach so.** B: Oder in diesem Latex-Editor Kile gibt es so ein Randspaltenmenü, wo einfach die Sonderzeichen, die dann als Tag eingeführt werden, einfach per Klick erreichbar und sichtbar sind. Und das ist sehr praktisch. **I: Verstehe. Dann hatte das aber nichts mit dem zu tun, was sie eben gesagt haben. Ich hatte gedacht...** B: ...was ganz avanciertes, nein, meine Frage war ganz einfach... **I: Ja gut. Ne. Dann habe ich das falsch verstanden. Ja.**

**I16-12#Wir waren bei dem Beispiel stehen geblieben, inwiefern also Mustererkennung dazu beitragen kann, dass neue wissenschaftliche Erkenntnisse auch erlangt werden können. Fallen ihnen da noch andere Möglichkeiten ein, inwiefern man digital arbeiten kann, im Sinne der Forschung wirklich? Dass das nicht nur einen Mehrwert bei der schnelleren Bearbeitung der Zusammenarbeit darstellt, sondern auch zur Erlangung von neuen Erkenntnissen beitragen kann?** B: Die Verwendung von TEI selber oder allgemein? **I: TEI ja, aber allgemein IT-Infrastruktur und die Möglichkeiten der Kooperation darüber, der Vernetzung von Inhalten, der Bearbeitung großer Datenmengen. Die Möglichkeiten sind ja vielfältig.** B: Ja. Also eingangs sagte ich ja schon, das ist sozusagen ein wissenschaftlicher

Mehrwert, wenn eine Genese konstituiert wird, die vorher so nicht konstituierbar war – unter Rücksicht wirklich aller kodierten Faktoren. Das ist aber nur ein Weg, um solche Daten zu nutzen und auch sehr effizient zu nutzen. Sie sprechen jetzt mehr über die Möglichkeiten von kollaborativer Vernetzung. **I: Ja auch. Also anschließend daran, was sie jetzt als Möglichkeit sehen: dieser Abbildung dieser Genese. Da finden ja Verknüpfungen statt. Auch semantische Verknüpfungen.** B: Beziehungsweise sie werden ausgewertet. **I: Genau.** B: Also die Idee wäre, dass sozusagen statt eines XSLT-Prozessors ein Compiler drüberläuft, der schlichtweg die Textgenese kompiliert. **I: Ah, verstehe.** B: In der Folge. Das wäre sozusagen eine Sekundärnutzung eines kollaborativ eingesetzten, kollaborativ erarbeiteten Editionstextes. Also das wäre eine automatisierte Nachnutzung oder eine halbautomatische Nachnutzung.

I16-13#Ansonsten? Ja. Es gibt ja die entsprechenden Module, die schon ein Anfang sind. Zum Beispiel das Lemmatisierungstool, das im Moment so im TextGrid-Lab noch so ein bisschen..., wie soll ich sagen, noch so ein bisschen alleine dasteht. Ne? Es ist so ein einsames Tool. Ich bin... Man muss bei solchen Sachen immer mit einzelnen spezifischen Tools anfangen mit der Entwicklung. So ist es immer. Und dann werden nachher Konzepte daraus, die dann zu mächtigeren Tools werden, wo dann aus dem Lemmatisierer schließlich ein Kommentierungstool wird, das zum Beispiel ermöglichen würde, dass innerhalb von TextGrid alle Mitarbeiter ihre Texte gegenseitig für die Kommentierung nutzen, so, wie es bisher nur als Lemmatisierungstool für Wörterbücher verwendet wird. Das wäre natürlich höchst wünschenswert.

I16-14#Wie das sonst mit dem wissenschaftlichen Wert aussieht? Ja. Ich meine der liegt im Grunde auf der Hand. Also es geht um Editionen von Texten, die letztlich dann frei zugänglich gemacht werden, so wie ich das verstehe. Es handelt sich um immense Datenmengen, die auf Papier zu drucken gar keinen Sinn mehr macht – ungeachtet der Reußschen Polemik, die wirklich überflüssig ist und keinem hilft. Ja. Darin würde ich, neben auch der kollaborativen... also kollaborativ versteht sich für mich von selbst. Man kann Spezialisten bei einem Text zusammenarbeiten lassen, die sich höchstens mal über Skype unterhalten können. Also das ist für mich schon wert genug.

**I16-15#I: Ja. Und bleibt vielleicht noch abzuwarten, wenn das Workflow-Management auch dahingehend funktioniert, dass verschiedene Tools verschaltet werden können, inwiefern daraus dann Mehrwerteffekte entstehen.** B: ...was die Arbeitsorganisation angeht... also gerade was das Koordinieren von großen Arbeitsgruppen angeht. Hätte ich jetzt nicht direkt unter Mehrwert verstanden, aber: Ja genau. Das hat für Koordinationen... also es ist



essentiell für Koordinationen, Arbeiten an großen Textcorpora. Und gerade wenn die Leute einzeln am Bildschirm arbeiten, zeigt sich das immer wieder, dass sie da auch gesteuert werden müssen oder sich sozusagen eine Steuerung geben lassen müssen, die ihnen unmittelbar sagt: „Jetzt darfst du und jetzt darfst du nicht.“ Weil sonst alle irritiert sind und alle ständig auch Frustrationserlebnisse haben, weil dann immer hinterher jemand sagt: „Das hättest du nicht machen dürfen.“ So. Und das also..., bei solchen Workflow-Managements besteht der Mehrwert darin, dass die Laune insgesamt besser wird.

**I16-16#I: Ok. Apropos Laune: Hatten sie nie an bestimmten Stellen Probleme? Sind sie an bestimmten Stellen hängen geblieben oder haben gedacht: Hmm, das da funktioniert hier noch nicht so optimal. Haben sie schlechte Laune bekommen an manchen...?** B: Nein. Schlechte Laune habe ich nicht bekommen. Ich... Ach Gott, jetzt erinnere ich gar nicht mehr so genau. Ich weiß es hat da und dort kleine Hänger gegeben und es war klar: Es lag am Betastatus. Und irgendwo ging mal die Serververbindung verloren. Das hat sich bei mir aber nicht so wahnsinnig festgehakt, sondern ich habe das alles für mich irgendwo unter Betastatus abgehakt. Und es schien mir... es waren wirklich mehr so diese kleineren Entwicklungshänger, die es eben gibt. Also wer einmal gesehen hat, wie jemand verzweifelt versucht, einen auf Java basierenden Server aufzusetzen, und wie lange das dauert und wie lange man da Trubleshooting macht, bis das Ding läuft, irgendwie, der findet das alles sehr unproblematisch. **I: Also der Gesamteindruck, was Bedienbarkeit, Erlernbarkeit und Navigation angeht. Wie war der für sie? Haben sie das alles unter dem Punkt Betastadium, ist noch verbesserungswürdig, gruppiert? Oder würden sie an bestimmten Stellen sagen, das kann ruhig so bleiben?** B: Ich würde an vielen Stellen sagen, das kann ruhig so bleiben. Ich glaube, dass... Vieles ist schon angesprochen gewesen, dass einige Bedienkonzepte eventuell noch mal zu überdenken sind. Also gerade was... Also bisher ist das Ganze zum Beispiel noch sehr menülastig. Also man muss an vielen Stellen wissen, was man jetzt machen will. Und man muss eigentlich das Eclipse-Konzept im Kopf haben, um zu wissen, was man eigentlich möchte. Und dann findet man auch, was man tun will. Sonst... **I: Aber intuitiv? Als nicht eclipseaffiner Nutzer?** B: Da muss man manchmal ganz schön suchen manchmal. Und das ist etwas, wo man noch mal über bestimmte auch begriffliche Konzepte und wie sie sich dann auch in der Folge der Bedienstruktur niederschlagen und auch sozusagen als Angebot sichtbar sind – „Ich kann jetzt das und das tun.“ – da könnte man noch ein bisschen was dran tun, glaube ich. Also ich weiß noch, dass ich so ein bisschen bei der Benutzeroberfläche hing. Aber ich hatte dann auch nicht den Ehrgeiz, das groß

weiterzuverfolgen in dem Punkt. Da hieß es irgendwie ein Projekt anlegen und dann irgendwelche Mitarbeiter diesem Projekt zuordnen. Das war... **I: So Rollenverteilung.** B: Rollenverteilung. Das war noch so ein bisschen von hinten durch die Brust ins Auge hatte ich das Gefühl. Und wenn ich mehr Energie gehabt hätte, irgendjemanden, den ich jetzt kenne, da jetzt als Mitarbeiter jetzt irgendwo einzutragen oder mich bei irgendwem als Mitarbeiter eintragen zu lassen, hätte ich das vielleicht noch weiter verfolgt. Aber so das, was ich so sah. Was wir gemacht haben und was ich gesehen habe, was ich so sah, da habe ich erstmal gedacht... ah, das muss jetzt vielleicht nicht sofort sein.

**I16-17#I: Aber mit dem Wörterbuchnetz haben sie ja gearbeitet im Zuge dieser Aufgabe. Wie fanden sie das? Was fanden sie da gut und schlecht?** B: Das fand ich schon... Also da erinnere ich mich jetzt auch nur ungefähr, aber das empfand ich als angenehm. Also ich fand das plausibel, dass unten rechts diese Liste erschien und dass ich das dann dort eingrenzen konnte. Und das war mir sehr plausibel. Und ich habe diese Implementierung auch erstmal verstanden, wie soll ich sagen, als eine Demonstrations-Implementierung im Sinne von: So in der Art wollen wir, dass unser Kommentierungstool dann auch mal aussieht und funktioniert. Und so wollen wir auch, dass unsere anderen Verknüpfungstools ungefähr funktionieren. Und wenn das so gedacht ist, finde ich das gut.

**I16-18#I: Gab es noch andere Funktionen, die ganz neu für sie waren, die sie überrascht haben vielleicht oder...?** B: Nein. Ich war... Nein. **I: Ok.** B: Oder ich schaue noch mal durch diese Liste. **I: Ja, na klar. Ja, sie hatten ja eben schon einiges erwähnt, was an TextGrid neu ist. Das ist aber ja auch nicht immer alles im Workshop schon ausprobierbar gewesen.** B: Genau. **I: Also da hatten wir auch schon drüber gesprochen.** B: Genau. Was mich nicht unbedingt eben überrascht hat, aber was ich eben wichtig finde, dass es das geben wird, sind Tools, die wir noch nicht gesehen haben. Workflow-Editor ist, glaube ich, wahnsinnig wichtig. Recherchetool fand ich selber nicht so wahnsinnig wichtig, weil, das mache ich sowieso mehr offline. Projektbrowser, Metadateneditor – das war zu erwarten. Der Lemmatisierer, da musste ich erstmal verstehen, dass das eine Demo-Implementierung ist, von einem spezifischen Tool. Gut. Ok. Das sind die Sachen.

**I16-19#**Was ich wichtig fand, was noch kommt, was ja auch zumindest demonstriert wurde, war dieser graphische Linkeditor ... **I: Der ist in Arbeit. Da wird fieberhaft dran gearbeitet.** B: ...mit fieberhaften Bemühen. Der hat mich gefreut und nicht überrascht, in dem Sinne, als dass ich gedacht habe, das braucht man. Und überrascht in dem Sinne: Aha, soweit sind sie schon,

also so weit haben sie es schon zum Laufen gekriegt.

**I16-20#I: Ok. Über Funktionen, die noch fehlen, oder die sie sich wünschen würden, haben wir ja schon eingangs gesprochen. Von daher ist die Frage schon beantwortet. Abschließend noch eine Frage, die in zwei Teile zu unterteilen ist, nämlich erstens: Was sehen sie als den größten Fortschritt an bei der TextGrid-Idee beziehungsweise -Umsetzung, oder zu erwartenden Umsetzung? Und was sehen sie als größte Schwierigkeit, als größtes Manko? Wo sind sie noch skeptisch?** B: Der größte Wert ist die kollaborative Bearbeitung von strukturiert digital zu erarbeitenden Editionen. Das ist der... Also ich denke diese Stichworte fassen es genau zusammen, was ich für den entscheidenden Wert halte. Die dann auch frei zugänglich sind für die Forschung und auch durch den freien Zugang frei vernetzbar werden. Was noch ein großer Punkt ist, der dann noch zu erledigen ist, aber das sehe ich auch als ein großes und eher längerfristiges Projekt, ist die Visualisierung von den Daten. Also bisher gibt es keinen TEI-Browser, mit dem man sich wirklich angucken könnte, was da ediert wurde. Man kann sich eben nur Code angucken, es sei denn, jemand implementiert seine Visualisierung dieses bestimmten Sets von Editionen über einen Server und projiziert das. Das gibt es. Aber es gibt überhaupt keine einheitliche Standard-Implementation dafür, wie man eine solche Edition ansieht. Und ich denke, das ist der nächste Schritt und es wird... Und ich denke an dem Punkt wird es nochmal philologische Diskussionen größeren Umfangs geben. Denn sobald die Philologen sehen, was man mit ihren Texten macht... Sobald sie das richtig sehen können, werden sie ganz schön piefig. Und dann kommen auf einmal die ideologischen Meinungsstreitigkeiten. Und das wird noch mal spannend. Aber ich denke, dass man mit den Möglichkeiten auch zwischen Views auf einen Text und seine Bestandteile, auf das Tagging, zum Beispiel hin- und herzuschalten, Perspektiven auszuwählen, dass es da genug Chancen gibt, fast alle Gemüter zu befriedigen – Herrn Reuß nicht, aber alle anderen. **I: Ok. Gut. Das wäre es. Vielen Dank.** B: Ich bitte sie.
