# Supplementary material
Source: publisher site journal article supplement (https://www.degruyterbrill.com/publication/isbn/9783110463927/downloadAsset/9783110463927_Interviews.zip)
Supplement: Supplementary file 9 [file I17.pdf › Interviews/I17.pdf]

**I17-1#I: Zuerst würde ich gerne etwas über ihren Hintergrund erfahren, über ihre EDV-philologische Erfahrung. Also inwiefern arbeiten sie EDV-unterstützt als Philologe? Was machen sie genau in dem Bereich?**

B: Also ich war bisher ein normaler Editor, also Analog-Editor. Und in dem Projekt, in dem ich jetzt arbeite, diese F-Edition, die eben tatsächlich gedacht ist, als eine elektronische Edition, die sowohl elektronisch bearbeitet wird, als auch elektronisch publiziert werden soll. Also das ist mein derzeitiges Betätigungsfeld, in das ich mich eben auch einarbeite und in dem dann auch tatsächlich EDV eine wirklich zentrale Stelle zukommt. **I: Ja.**

**Und ihre Erfahrung auf dem Gebiet? Inwiefern haben sie schon mit elektronischer Unterstützung gearbeitet?**

B: Also ich habe bisher noch keine elektronische Edition gemacht. Also ich war... Kenne... Ich habe meine Promotion an einem Graduiertenkolleg Textkritik in M gemacht. Und da habe ich einiges mitbekommen, also was da andere gemacht haben. Aber das waren immer Projekte von anderen. Deswegen weiß ich, was es so gibt und so weiter, aber habe es nie selbst gemacht. Und das war für mich auch ein Grund, warum ich das hier machen wollte. Weil das für mich fällig war. **I: Aber sie haben jetzt schon damit angefangen, mit einem XML-Editor zu arbeiten beispielsweise – und auch schon vor dem TextGrid-Workshop?**

**Oder war das für die dann ganz was Neues?**

B: Nein, ganz neu war es nicht. Das also... XML und HTML und solche Sachen, das ist mir bekannt. Insofern war es keine große Überraschung. Und also... Aber ich denke: Elektronische Editionen – man muss sie machen, um das wirklich beurteilen zu können. Und das habe ich bisher tatsächlich nicht so intensiv gemacht. Also XML so – das war mir geläufig. Aber eben nicht so als Praxis, dass ich es selbst zum Arbeiten verwendet hätte.

**I17-2#I: Und was haben sie sich dann von dem TextGrid-Workshop erwartet? Was haben sie von dem TextGrid-Lab erwartet?**

B: Ja gut. Ich hatte mich ja vorher informiert anhand dieser Projektbeschreibung, die ja im Internet zugänglich war. Und ja – erwartet hatte ich mir ein bisschen das, was angekündigt worden war, also vor allem die Interaktion von verschiedenen Komponenten. Und ja – und das ist aber eigentlich in diesem Workshop ja eher nur ansatzweise zur Sprache gekommen. Was man dann eben demonstriert bekommen hat, war TextGrid in der Verlängerung als XML-Editor – größtenteils. Also das war für mich nicht so schlimm, weil ich ohnehin nicht so drin war. Ich habe aber gehört, dass manche das auch nicht so toll fanden, dass es noch nicht so weit entwickelt war. Also es war klar, warum das so war. Und... aber... also erwartet hatte ich im Grunde ein bisschen, dass das demonstriert wird, wozu es eigentlich gedacht

ist. Und das kam aber nicht ganz heraus. **I: Ja. Also die Funktionen, die eigentlich über den XML-Editor hinausgehen, meinen sie, dass die stärker demonstriert werden? Ja, sie hatten auch ohnehin geschrieben, in dem Fragebogen, dass sie den Workshop eigentlich zu kurz fanden. Also gerade vor dem Hintergrund, dass sie da noch recht wenig Erfahrung in der Richtung mitgebracht haben. Hätten sie sich gewünscht, dass der länger wird. Was hat ihnen da noch gefehlt? Können sie da noch mal genauer drauf eingehen auf den Kritikpunkt? Einfach nur zu kurz? Oder fanden sie...?** B: Nein, nicht zu kurz. Also um es...

Ich hatte den Eindruck, dass also zu dem Zeitpunkt, als dieser Workshop gemacht wurde, dass im Grunde auch von Seiten der Veranstalter nicht alles angeboten werden konnte, was eigentlich gedacht war, und dass es deswegen darauf hinlief, dieses TextGrid wie einen Texteditor zu nutzen, indem man eben die Verbindung zum Wörterbuch oder so einschlagen kann, dass das aber eigentlich gar nicht das war, was eingeplant gewesen war. Ist das eine korrekte Vermutung?

**I: Also dass viele Tools, beispielsweise, die entwickelt werden, noch nicht so weit waren, dass sie hätten getestet werden können, das stimmt, ja. Natürlich. Es war eine Beta-Testreihe. Klar.**

B: Und da hatte ich im Grunde gar nicht so sehr Erwartungen: Ich möchte jetzt das oder das sehen. Sondern ich hätte tatsächlich ganz gerne mehr die Möglichkeiten dieses Projekts näher vorgestellt bekommen, denn, also... Es ist ja oft nicht so, dass man sagt: Man braucht das und das, dass man sagt: Ja, wo gibt es das? Sondern manchmal muss man auch gesagt bekommen: Ja, es gibt das und das. Und das kann man so und so machen. Und das habe ich ein bisschen vermisst eigentlich.

**I: Ja.** B: Also so ein bisschen die Vorstellung von Möglichkeiten. Es gibt... Also nein. Es wurde gesagt, dass es das gibt und geben soll. Und es war aber noch nicht so weit. Und insofern hat sich die Veranstaltung eben sehr stark auf... Es wurde immer dieses eine Beispiel... also ein einziges... und es war dann auch... also Entschuldigung, ich will das nicht unbedingt... es hört sich vielleicht kritischer an vielleicht, als es gemeint ist. Aber es war offensichtlich: Die Veranstaltung – für Leute wie mich war die sehr geeignet. Aber es war nur eben..., ich war da eigentlich in der Minderheit. Es waren andere da, die sich sehr viel besser auskannten. Und für die war das zu wenig – und im Grunde für mich eigentlich dann schon auch fast. **I: Ja, weil sie einen Schritt weitergehen wollten, als die...** B: Ja. Nur immer ein relativ einfaches Beispiel auszuprobieren – also da hätte man das an einem Vormittag kurz vorführen können.

**I17-3#I: Aber sie sagen ja, sie haben sich vorher schon ein bisschen darüber informiert, was alles geplant ist an Funktionalitäten. Jetzt würde uns natürlich interessieren: Was wäre für sie besonders wichtig?** B: Besonders wichtig war das, was ganz am Ende noch vorgestellt

wurde. Also das mit dem... Wie hieß das? Wo man die Handschriften betrachten konnte? **I: Der graphische Linkeditor? Also die Verknüpfung mit Bild. Oder?** B: Ja. Also das wurde ganz zum Schluss vorgestellt. Also das war im Grunde das einzige Tool, das außer diesem Editor vorgestellt wurde. **I: Ja. Könnten sie die Funktionalität da beschreiben?** B: Ja, das war tatsächlich, wo Handschriften eingescannt waren und wo man dann am Bildschirm das transkribieren konnte und wo man dann das weiterbearbeiten konnte, wie man dann Handschriften präsentiert. **I: Ah ja. Genau. Das war, glaube ich, der graphische Linkeditor.** B: Ja genau. **I: Also dass man wirklich das Original ...** B: Ja. Und das wird... Ja. Also das wäre für mich auch das, was wir jetzt brauchen, was ich jetzt brauchen könnte zum Arbeiten. Und auf das hatte ich eigentlich gehofft. Und es kam auch, aber das wurde dann eben nur gezeigt und... Also wenn man das zur Verfügung hat, also das wäre das, womit ich dann das nächste Jahr ganz gut arbeiten könnte. Und wie gesagt, auf das warten wir jetzt eigentlich auch, dass es das gibt.

**I17-4#I: Gut. Gibt es weitere Funktionen, die neu für sie waren, jetzt, die vielleicht kurz vorgestellt wurden oder von denen sie bei ihrer Vorinformation gehört haben?** B: Also von dem, was da vorgestellt wurde, eigentlich nicht. Also ich hatte eben den Eindruck, dass es im Wesentlichen eine Präsentation war eines XML-Editors. Es ging um die Präsentation einer Software, von der primär die XML-Funktion präsentiert wurde.

**I17-5#I: Können sie sich weitere Funktionen vorstellen, die für ihre Arbeit wichtig wären? Sie hatten jetzt ein Beispiel genannt, das in TextGrid schon vorhanden ist. Haben sie da eine Idee, was sie besonders gut gebrauchen könnten, was in TextGrid angeboten werden könnte?** B: Könnten sie ein bisschen genauer fragen? Also... **I: Ja. Ich würde eben gerne wissen, was sie an IT-Tools für ihre Arbeit besonders gut gebrauchen könnten – jetzt über den XML-Editor hinaus und dieses Beispiel, dass sie jetzt genannt haben. Ohne dass es vielleicht jetzt schon vorgeschlagen wurde, oder bei TextGrid angedacht wurde, so wie sie sich informiert haben.** B: Ja, na gut. Also ich überlege mir öfter, wie man so einen komplexen Text eigentlich darstellen soll. Also das Typische ist ja, dass man... also ein komplexes Werkprojekt, das in verschiedenen Fassungen existiert. Und da stelle ich mir manchmal vor, dass man mit... – wie sagt man das? – dass man sozusagen nicht als verschiedene Texte, als verschiedene Fassungen, also verschiedene Dateien speichert, sondern dass man das alles als ein Kontinuum behandelt. Und da wäre im Grunde das Wichtigste, ein Differenzierungssystem zu haben, also in dem man einerseits... Oft ist es ja so: Man hat da eine Stufe, da eine Stufe, da eine Stufe. Und da kann man einzelne Elemente ganz einfach aufeinander beziehen. Das ist einfach.

Aber schwierig wird es, wenn das eben nicht mehr so läuft. Also wenn man verschiedene Stadien in Bezug setzen möchte und da allerdings keine ganz einfachen äußerlichen Kriterien hat, um die zu verknüpfen oder zu differenzieren. Und da, was ich hervorragend fände, wäre so ein System, das das erlaubt. Und es gibt ja so was auch mit Semantic-Web. Das ist ja etwas, im Grunde, das diese Vorstellung... Dass man das benutzt, um so was zu machen, also um komplexe Verweise zu ermöglichen, zwischen bestimmten Stadien von einem Text oder von einem Werk, die anspruchsvoller sind, als bloße Textreferenzen. Also das ist etwas, was tatsächlich sehr eng verknüpft ist eigentlich mit editorischer Arbeit, weil man das oft hat. Also man muss zum Beispiel... Also einfach ist: Man hat einen Entwurf zu einem Werk und dann das ausgeführte Werk. Also normalerweise bezieht... Oder einen Notizenplan. Also das soll so und so aussehen. Und man kann das dann im Grunde... also man weiß, das ist irgendwie der Plan und das das ausgeführte Werk. Aber die beziehen sich aufeinander nicht über irgendwelche verbalen Übereinstimmungen, sondern eben dadurch, dass hier eben so was wie der semantische Kern formuliert wird, der dort ausgearbeitet wird. Und das kann man sich auf ganz verschiedenen Ebenen vorstellen. Und dann gibt es auch... Also es gibt sozusagen irgendwo einen Entwurf. Der ist irgendwie formuliert und hat dann auch später eine Entsprechung. Aber die Entsprechung ist eben nicht so, dass sie irgendwie durch verbale Bezüge zu bestellen wäre. Und das formulieren, das kann man leicht. Also sozusagen: Das ist der Plan. Und das ist die Ausführung, oder so. Aber so eine relativ bisschen formalisierte, aber andererseits leistungsfähige Möglichkeit solche Sachen zueinander in Bezug zu setzen. Das halte ich für eine anspruchsvolle Aufgabe. Aber das hätte ich gerne. Und ich hätte es auch gerne also erstens aus technischen Gründen, andererseits wüsste ich eben auch ganz gerne... also ich denke eben, dass man... dass es da... also es gibt ja Überlegungen zum Semantic Web, dass es da einfach... dass Informatiker da Vorstellungen haben, wie man so was beschreibt, also Dinge ganz trennt. Dass man da auch eine Möglichkeit lernt, solche Beziehungen zu beschreiben, um sie auch darzustellen und sie auch so zu präsentieren. Also das hätte ich gerne. **I: Also das Sichtbarmachen von Bezügen, die jetzt darüber hinausgehen, dass einfach wörtliche Entsprechungen in verschiedenen Varianten da sind.** B: Ja. Nein, es geht mir nicht... Ja. Ja.

I17-6#Erstens das sichtbar machen, aber andererseits auch – wie soll ich sagen? Mir geht es da gar nicht so sehr um das Präsentieren – das geht irgendwie – sondern auch das artikulieren zu können. Also dass... ich denke eben, dass man auch ein bisschen eben nicht nur die Technik nutzen sollte, sondern eben auch ein bisschen ein Lernen davon, wie die das beschreiben. Also

das interessiert mich eigentlich fast mehr, als dann die konkrete Technik, wobei ich die Technik natürlich nur einfach dringender bräuchte. Denn... Also ich denke eben, dass... Ich finde es eben interessant, dass ... Also man muss das ja... Also, wenn man das als Programm schreibt, dann muss man das einfach auf den Punkt bringen, sozusagen, was wir als Geisteswissenschaftler ja ..., womit wir uns mit ein paar Worten darüber hinwegretten können, die soweit tragen, wie sie tragen. Aber das fände ich eigentlich ganz interessant. Also wenn man das auch stärker, wenn man es noch mehr ein bisschen stärker unter Genauigkeitsanforderungen gestellt sieht, die einem dann auch helfen, die Sachen selbst genau in den Blick zu bekommen.

**I17-7#I: Sind sie dann in dem Zusammenhang auch der Meinung, dass mittels solcher IT-Möglichkeiten auch wissenschaftliche Erkenntnisse erlangt werden können, die mit konventionellen Methoden kaum, oder gar nicht erlangt werden können?** B: Ja, ich hoffe

doch. Also das wäre natürlich... Das hoffe ich... Also, wie gesagt ja gerade... Also ich denke, dass etwas präsentieren zu können, also das so als Mittel zu benutzen, um anderweitige Arbeit oder Sachen darzustellen, das ist das Eine. Aber das... Ich denke schon, dass man, wenn man anfängt... Also dass man einfach auch ein bisschen lernen kann, von dem, wie andere Leute denken. Es ist manchmal dann auch eine Gefahr, weil man dann anfängt, sozusagen, dann seine eigenen Ansprüche aufzugeben, um anderer Leute Ansprüche erfüllen zu können. Aber am Besten wäre das natürlich, wenn man dann auch das verbindet zum beiderseitigen Nutzen. Und dann ist es so. Also ich sehe das jetzt schon von unserem Projekt. Wir beginnen gerade erst... Das ist ja von Anfang an auf Zusammenarbeit mit Informatikern und Literaturwissenschaftlern aufgebaut. Also das führt oft zu also positiven Kommunikationsproblemen, einfach weil man durch Druck die Sache einfach noch mal artikulieren muss. Und... Also wir machen es im Augenblick so, dass wir ältere Forschungsarbeiten durchgehen und die daraufhin durchsehen, wie man sie einfach für einen Informatiker sozusagen verständlich formulieren kann. Und das ist im Grunde schon eine große Hilfe, weil man dann sieht, dass die Anforderungen an Genauigkeit und Systematik in der Klassifikation zum Beispiel, der Terminologie, Handschriftenbeschreibung, dass die da bei Weitem nicht so weit gediehen sind, wie man sich das wünschen würde, weil das einfach oft auch nicht nötig war. Aber jetzt muss man das einfach sehr viel genauer machen. Und das ist schon ein Fortschritt. Das ist dann auch... Man muss sich so einfach bestimmte Dinge, die man für selbstverständlich hält, klarmachen. Und das ist schon mal was. Und damit... Im Grunde geht es mir, wenn ich eine optimale Zusammenarbeit von Informatik, oder IT und Geisteswissenschaften vorstelle, tatsächlich darum, dass das eben nicht nur... Man erarbeitet irgendwie unabhängige

Ergebnisse und stellt die dann dar. Sondern das sollte schon noch weitergehen. Und insofern, denke ich, dass das auf jeden Fall zu einer Art von Fortschritt führen sollte, den man nicht hoch genug schätzen kann. **I: Wo wir gerade beim Punkt Zusammenarbeit sind. Das war jetzt eher interdisziplinäre Zusammenarbeit. Also inwiefern können Informatik und Geisteswissenschaften zusammenwirken.**

**I17-8#Die Möglichkeiten der Kollaboration über Systeme wie TextGrid unter verschiedenen geisteswissenschaftlichen Disziplinen. Welches Potential sehen sie da? Und inwiefern ist das jetzt für sie relevant und für ihre Arbeit?** B: Wie unter verschiedenen geisteswissenschaftlichen Disziplinen? Also sie meinen jetzt Musikwissenschaft und Literaturwissenschaft? Oder wie? **I: Also das hat einerseits den Aspekt der dezentralen Zusammenarbeit beispielsweise von verschiedenen germanistischen Projekten – also nicht interdisziplinär – aber auch Zusammenarbeit beispielsweise zwischen Geschichtswissenschaftlern und Germanisten, Musikwissenschaftlern und Germanisten. Es stellt ja eine Plattform dar, dass man dezentral zusammenarbeiten kann im Grunde. Das ist ja einer der Vorteile oder erhofften Mehrwerte, die sich daraus ergeben.** B: Ja, also das. Gerne. Also ich bin, wie gesagt, selbst an einem Graduiertenkolleg, habe ich im Grunde meine Sachen gelernt. Und mir sind... Also ich kenne deswegen sozusagen, was Musikwissenschaftler machen, was Historiker machen. Und das ist etwas, was ich immer als sehr hilfreich empfunden habe – aus verschiedenen Gründen. Und wenn das über TextGrid möglich sein wird, dann umso besser. Im Augenblick, das ist aber eine generelle... also ich finde das generell gut, weil ich einfach zum Beispiel weiß, dass Musikwissenschaftler bestimmte Sachen, bestimmte Techniken einfach besser können als wir, weil die dann auch... Also zum Beispiel Musikerhandschriften, die sind meistens zehn-, oder hundertmal so teuer wie Dichterhandschriften. Deswegen verwenden die mehr Mühe auf Handschriften. Deswegen kann man von ihnen im Umgang mit Handschriften viel lernen, also weil deren Objekte viel teurer sind. Deswegen ist eine Kenntnisnahme von irgendwas anderem auch auf jedem Fall gut. Und wenn es über TextGrid läuft, umso besser. Also dass jetzt konkret das TextGrid da beitragen..., also abgesehen davon, dass es eine Plattform bietet, über die das gemacht wird, das ist im Augenblick, sehe ich im Augenblick noch nicht ganz, wobei ich mir das gut vorstellen kann. Also... Und so als, tatsächlich als Plattform, die das auch irgendwie trifft und umso besser wäre es... Am besten wäre es natürlich, wenn es tatsächlich einen Standard gäbe, der einerseits flexibel genug ist, damit man machen kann, was man machen möchte, der aber andererseits so ist, dass man bestimmte Probleme in einer Weise formulieren

kann, die für andere dann leicht auch verständlich sind, weil sie im Grunde mit derselben Technik, also zunächst mal mit derselben Softwarebearbeitung und dann sozusagen irgendwie im Kompatibilitätsmodus zueinander stehe. Und das fände ich schon ganz gut.

**I17-9#I: Ja. In ihrer täglichen Arbeit in dem Projekt, in dem sie jetzt arbeiten. Gibt es da Zusammenarbeit mit anderen Stellen? Und wie sieht die bisher aus?** B: Ja. Also Zusamm...

Also zunächst mal das Projekt, das wir machen, besteht ja im Grunde aus einer Zusammenarbeit von verschiedenen germanistischen Institutionen jetzt. Also W, G-Archiv, F und D, jetzt W – also mit Herrn J. Und geplant sind auch weitere Zusammenarbeiten mit anderen Institutionen – also jetzt primär nicht informationstechnischer Art, also mit L und.... ich weiß nicht, irgendein Tintenforscher in D oder so. Und ... Also es ist viel geplant. Und wir... Also ich... Wir sind im Grunde jetzt gerade dabei, solche Listen aufzustellen, mit wem wir alles in Kontakt treten wollen. Also wir haben länger angelegt, also nicht lange, aber länger angelegtes Projekt und sind da jetzt am Anfang. Und da... das ist eben tatsächlich auch interdisziplinär... Ja? Ne? Es ist so angelegt, dass man möglichst viele Sachen machen möchte, die man selbst nicht machen könnte. Und da ... Im Augenblick sind wir noch ein bisschen dabei, die Wunschliste aufzustellen, was wir alles machen können. Und das entscheidende, was dann tatsächlich gemacht wird, das steht uns noch bevor. Oder es ist im Grunde ja jetzt schon klar. Wir tun noch so, als wäre im Grund alles möglich. Und das ist, denke ich, auch eine wichtige Phase, also dass man sich erstmal ein bisschen erkundigt, was prinzipiell möglich ist. Und dann: Was ist zeitlich oder technisch realisierbar, das ist dann... das dann zur Kenntnis nimmt. Aber erstmal die Explorationsphase offenhält. **I: Und die Kommunikation findet da per E-Mail statt oder wie?** B: Also wir

arbeiten über Wiki. **I: Ja. Ok.** B: Wir arbeiten über einen Wiki und das ... also alles, was irgendwie an Schriftlichem anfällt oder... also nicht nur Ergebnisse, sondern Arbeitsschritte, die werden bei Wiki im Grunde präsentiert. Und die Arbeitsstelle ist hier, also hier sind die meisten Mitarbeiter. Und es gibt dann aber andere Mitarbeiter, die werden dann teils über Skype-Konferenzen – wie auch immer – daran beteiligt. Also und... Aber das Wiki ist im Grunde im Augenblick das Zentrum unserer Arbeit. Also alles, was wir bis jetzt gemacht haben, steht in unserem Wiki. **I: Ja. Also da findet dann die Vernetzung von Inhalten statt. Die...** B: Ja, und auch... Also es ist auch die gegenseitige Kenntnisnahme ist... Also es ist im Augenblick relativ... Also es sind ja nicht so viele dabei. Es hält sich in Grenzen. Und da kann man die Improvements und Changes relativ gut sehen. Also wer macht jetzt was? Und das ist dann auch eine... Also da weiß man jetzt besser Bescheid als woanders, wo, wer, was macht.

**I17-10#I:** Gut. Dann noch einmal kurz zurück zu dem TextGrid-Lab. Wenn sie bisher mit Wikis gearbeitet haben und mit anderen XML-Editoren, haben sie ja irgendwo auch den Vergleich. Ist diese Arbeitsumgebung gut zu erlernen? Kommen sie da gut zurecht mit der Navigation und der Führung durch das System? Oder hatten sie da Stellen an denen sie eher Probleme hatten? B: Schwer zu sagen. Also ich glaube... Also ich hatte tatsächlich ein Problem, aber das hatte, glaube ich, nichts mit dem TextGrid zu tun. Ich hatte da irgendwie... Kann ich schwer sagen, weil es tatsächlich... Das wurde ja nur ein einfaches Beispiel genannt und das funktionierte. Das ... Insofern... Ich würde mir da jetzt kein Urteil zutrauen. Ja. Also kann ich tatsächlich nicht mehr dazu sagen. **I:** Ok. Sie hatten in dem Fragebogen aber zum Beispiel angekreuzt, dass Fehler bei der Nutzung nicht leicht zu korrigieren sind. Also dass man da... B: Habe ich das? **I:** Ja. Dass man da irgendwo hängen bleibt. Hier: „Fehler bei der Nutzung des Labs sind leicht zu korrigieren.“ Da haben sie „Trifft eher nicht zu“ angekreuzt. B: Zeigen sie mir mal? **I:** Ja. Das verstehe ich nicht ganz. Hier bei den Hilfefunktionen haben sie es eher positiv bewertet und dann hier aber ... Da wollte ich fragen: Erinnern sie sich da noch, wo sie da hängen geblieben sind? B: Keine Ahnung. Ich weiß nicht mehr, was damit gemeint ist. Also ich habe das natürlich nicht... Ich habe diese Kreuze natürlich nicht... Ich habe diese Kreuze nicht über die Fragen verteilt. Also zunächst mal diese Bemerkungen... Also ich kenne ja diese Evaluationsbögen. Und ich finde immer, dass generell zu gut bewertet wird. Und das finde ich nicht gut, dass Evaluationsbögen ja nicht aussagekräftig sind. Und deswegen also, mache ich dann das auch. Also man ist dann auch irgendwie nicht so sehr... Es ist nett, dass man eingeladen wird und so. Dann möchte man auch nichts Schlechtes sagen. Deswegen versuche ich grundsätzlich nicht nur Positive zu geben. Aber das ist jetzt tatsächlich... Also ich weiß es nicht mehr, was ich da ausgefüllt habe. **I:** Ja, aber gut. Ich meine sie haben sich auch konkret dazu geäußert, dass es noch..., dass der Schwerpunkt etwas zu sehr auf dem XML-Editor war und... Ja. Also ansonsten Probleme mit dem Umgang und mit der Erledigung der Beispiele hatten sie nicht. Sie waren eher der Meinung, dass es ein bisschen zu wenig war. Oder? B: Ja doch. Ich hatte eben tatsächlich mit einem ein Problem... Solange bis ich einfach meinen Nachbar fragte und er mit das erklärte. Aber das war jetzt einfach ein Bedienproblem, wo ich irgendwie bei der Erläuterung nicht richtig aufgepasst hatte. Aber ich glaube nicht, dass das was mit dem TextGrid zu tun hatte. Und was jetzt also zu dieser Bewertung führte, das weiß ich nicht. Das ist merkwürdig. Da macht man so bestimmte Aussagen und später weiß man nicht mehr, was es war. Tut mir leid.



**I17-11#I: Ja. Nein, kein Problem. Mich würde eben einfach nur interessieren, was sie so für einen Gesamteindruck mit der Handhabung des Systems haben?** B: Ich würde sagen, dass das... Also man muss da teilen – einerseits zwischen dem, was sozusagen ausgearbeitet vorliegt, und andererseits dem, was vorgestellt wurde, also sozusagen was jetzt in der unmittelbaren Entwicklungsphase ist. Das, was in der unmittelbaren Entwicklungsphase ist, das hätte ich gerne. Also das was vorgestellt wurde, das ist im Grunde ein bisschen zu ... also das ist im Grunde zu wenig. Also es waren ja dann tatsächlich auch Fragen... Als dann bei dem gefragt wurde, wo dann auch Teilnehmer sich besser auskannten als ich, die dann auch sagten: Also ich hätte jetzt eigentlich gerne mehr gesehen. Also ein XML-Editor – das gibt es auch sonst. Also das schien mir auch nicht nur mein Eindruck zu sein. Und... also für mich war das ganz interessant – aus verschiedenen Gründen. Aber interessanter wäre es noch gewesen, wenn da auch das, was jetzt, also was sozusagen nicht in der Betaphase ist, wenn das zur Verfügung stünde. Zunächst eben also dieses Graphik...? **I: Diesen graphischen Editor.** B: Das wäre das, was für meine konkrete Arbeit, jetzt was ich mache, was ich jetzt für nötig hätte. Und, ja, ich weiß nicht, das ist irgendwie keine präzise Antwort auf ihre Frage, aber ist irgendwie auch mein persönlicher Eindruck. **I: Ja, doch. Ich habe ja nach einem Gesamteindruck gefragt.**

**I17-12#Und noch ein Punkt. Was ja schon so zur Verfügung stand – zumindest in gewissem Maße – war ja die Verknüpfung mit Wörterbüchern. Inwiefern können sie die gebrauchen? Oder wie fanden sie dieses Angebot?** B: Ja, also... Also ich finde generell, dass man Einbindungen im großen Stil machen sollte – also nicht nur aus Wörterbüchern... Also wir machen das so. Wir haben oft auch... Wir edieren nicht nach Text, sondern wir machen sozusagen auch einen Kommentar zu Entscheidungen, die man trifft und so. Und da verweist man auch auf Entscheidungen, die andere treffen und alle erstmal verweisen, in der Regel. Also das Problem ist, dass es im Augenblick kein... Also Wörterbuch ist gut, weil es stabil ist. Aber wenn man generell viel mit Verweisen arbeitet, ist das Problem, dass man irgendwie keine stabilen Adressen hat. Das führt dazu, dass man es nicht so weit machen kann, wie man es machen möchte. Aber das halte ich generell für ein sinnvolles Unternehmen. Und zwar nicht nur mit Wörterbüchern. Wörterbücher ist klar. Aber das ist vielleicht das, das man am wenigsten braucht. Das ist am leichtesten machbar, weil es da verfügbare Texte gibt. Also aber was man eben bräuchte, wäre zum Beispiel für Literaturangaben oder so, dass man die nicht selbst eingibt, sondern man hat irgendwie einen deutschen Nationalbibliothek-Link. Der ordnet dann für diesen... also dass ist im Grunde dann für mich... dasselbe Prinzip. Und da hätte ich zum Beispiel

gerne, dass es stabile Adressen für Aufsätze gibt. **I: Ja. Also auch eine Sekundärliteratur, die darüber verbunden werden kann...** B: Nein. Also ja. Also ich treffe eine Entscheidung und sage dann: G hat so entschieden und S hat so entschieden. Und Herr I hat so entschieden. Und da möchte ich verweisen können, auf eine Aufsatzdatenbank, dass ich dann diesen Titel sozusagen nicht selbst eingeben muss, sondern den... Also das ist für mich dasselbe Prinzip. Und gerade bei Aufsätzen ist das Problem, dass es irgendwie... Also bei Büchern ist das kein Problem. Da gibt es stabile Adressen. Und bei Aufsätzen ist es ein Problem. Da gibt es die nicht. Und allgemein, das ist natürlich einfach eine Ersparnis, aber andererseits ist es eben auch eine Möglichkeit, bestimmte Sachen aktuell zu halten, wenn man ein Thema...also die in dem Sinne sorgt, das hier die Sachen nicht zu schnell veralten, die man ... **I: Gut. Ach ja. Eines noch. Auch im Zusammenhang mit den Wörterbüchern. Die Geschwindigkeit des Lab, haben sie als eher negativ als positiv angesehen.** B: Die Geschwindigkeit von was? **I: Das Lab allgemein. Also wie schnell werden zum Beispiel Rechercheanfragen bearbeitet. Und ähnliches.** B: Ja das muss mit den... Das kann ich jetzt auch nicht mehr sagen. Kann ich mich nicht mehr erinnern.

**I17-13#I: Gut. Abschließend noch. Auch wieder auf den Gesamteindruck referierend. Was sehen sie als größten Fortschritt, der durch TextGrid erreicht werden könnte. Und was sehen sie noch als größte Schwierigkeit an, als das größte Problem?** B: Also der größte Fortschritt jetzt, das scheint mir einfach also in verschiedener Hinsicht die Vernetzung zu sein. Also erstens, dass es verschiedene Tools kombiniert und integriert, und dann auch, dass es verschiedene Projekte kombiniert – also das...also auch auf der Projektebene, dass es eben tatsächlich eine Möglichkeit ist, eine Plattform herzustellen, in der man dann auch mit vielen verschiedenen... ja ... einfach Kenntnis nehmen kann und auch zusammenarbeiten kann – gegebenenfalls, also das eine absolute Kommunikationsverdichtung schafft und dann aber auch die Grundlage dafür, dass es eine ähnliche Technologie für alle Tools bereitzustellen verspricht, von der man dann einfach aus am besten miteinander sprechen kann. Das ... Und was war die zweite Frage?

**I17-14#I: Ja, das größte Manko, das größte Problem, die größte Schwierigkeit, die sie sehen. Wo sind sie skeptisch zum Beispiel?** B: Ja. Also das Manko. Ich hatte ja bisher schon gesagt, was. Aber das ist natürlich ein rein zeitliches Problem. Dass es wirklich noch nicht so weit ist, wie es..., wie ich es gerne hätte. Und dann. Also irgendwie eine grundsätzliche Kritik möchte ich jetzt eigentlich gar nicht anbringen. Also ich könnte mir schon irgendwas vorstellen, aber das ist, glaube ich, im Augenblick nicht spruchreif. Also nichts, was mir jetzt gegen

TextGrid ist, einfiele. Also ich bin mir nicht sicher. Also ich kenne ja nur diesen Antrag, also das... Man muss auch mal so antragspro sein. Ich will nicht einschätzen können, wie es ja oft... Also ein Ziel muss ja oft auf eine bestimmte Weise formuliert sein. Es ist mir nicht klar... also wie realistisch eigentlich diese Anträge sind, also auch das Gesamtprojekt. Das kann ich schwer einschätzen. Und das Projekt ist, glaube ich, auch noch nicht so weit, dass man wirklich sagen kann... also auf jeden Fall für Außenstehende. Also ich bin mir nicht sicher... Also das, was ich gelesen habe, klingt mir sehr ambitioniert. Und so soll es ja auch sein. Es wäre aber nicht gut, wenn diese Ambitionen nicht eingelöst würden. Aber ich denke, das wäre sehr, sehr schädlich. Deswegen hoffe ich sehr, dass das dann auch gelingt. Weil man so ein groß angelegtes Projekt kein zweites mal machen könnte. Also deswegen wünschte ich schon sehr, dass es einen sinnvollen Abschluss findet. **I: Gut. Dann vielen Dank.** B: Ok.
