# Supplementary material
Source: publisher site journal article supplement (https://www.degruyterbrill.com/publication/isbn/9783110463927/downloadAsset/9783110463927_Interviews.zip)
Supplement: Supplementary file 10 [file I18.pdf › Interviews/I18.pdf]

**I18-1#Interviewer: Zunächst würde ich gerne wissen, inwiefern Sie im Bereich eHumanities tätig sind, welche Erfahrungen Sie auf dem Gebiet haben und inwiefern Sie in dem Gebiet arbeiten?**

Befragte/r: Also ich habe 1979 angefangen, eine kritische Ausgabe zu J zu erstellen und zwar mit der Datenverarbeitung als Hilfswerkzeug, mit dem Tübinger TUSTEP-Programm. Diese Ausgabe, die ist in sieben Jahren da erstellt worden und ich habe damals auch in einem Arbeitskreis der Arbeitsgemeinschaft für Philosophische Editionen – Wie nannte sich das...? – jedenfalls, ja, eine Arbeitsgruppe „Technik“ nannten sie die. Die kam jährlich in Thüringen zusammen und ich bin von der damaligen Zeit her kontinuierlich eigentlich mit der Datenverarbeitung in den Geisteswissenschaften und speziell im Bereich der Editorik in Verbindung gewesen. Das hat sich dann weiterentwickelt. Ich habe zunehmend auch, nachdem diese Ausgabe, die zielte auf mein Buch hin, aber war wie gesagt vom ersten bis zum letzten Atemzug datenverarbeitungsgegründet? Das konnte damals nur auf ein Buch zulaufen, weil es die Möglichkeiten einer etwa webbasierten ... oder irgendwie Austauschmöglichkeiten und dergleichen gab es überhaupt nicht. Im Laufe der Zeit bin ich dann mit den weiteren Materialien etwa zu J, aber auch zu anderen Autoren, in Berührung gekommen. Das waren Handschriften, Entwurfshandschriften und dann habe ich mich konzentriert, der Frage nachzugehen und einiges selber zu experimentieren, wie man eigentlich Schreibvorgänge in Handschriften im elektronischen Medium simulieren könnte. Und da habe ich dann in die verschiedenen Richtungen auch Kontakt gewonnen. Besonders nachhaltig war das, was sich ergab, als I mit seinem damaligen Projekt H den Sofia-Kovalevskaja-Forschungspreis in Deutschland bekommen hatte und hier in M und in diesen Räumen eine Arbeitsgruppe aufmachte und mit bis dahin unveröffentlichten N-Materialien, Handschriften und Fragmenten genau diese Art von Handschriftendarstellung und -transkription vorangetrieben hat. Da habe ich also eine Menge auch für mich gelernt und habe das auch einfließen lassen in die Dinge, die ich tue und habe auch in den verschiedenen Ecken einfach auch beobachtet, was sich da inzwischen entwickelt hat. Ich bin nie ein wirklicher ausgebuffter Computermensch gewesen, aber habe versucht, zu verstehen: a) was da geht und zweitens, wie Datenverarbeitung dazu gebracht werden kann, das zu leisten, was ich als Philologe und als Editor und als Literaturkritiker mir erwarte. Und seit drei Jahren bin ich auch Chairman einer so genannten C, das wurde ursprünglich auch von I gegründet, ein Zusammenschluss von Projekten, europaweit, die alle an der Datenverarbeitung in der Edition im Umgang mit Texten, im Umgang mit der Forschung zum Aufbau von Forschungsplattformen

interessiert sind und die sich da austauschen und wie gesagt, ich bin da Chairman dieser bald auslaufenden Gruppe.

I18-2#Und meine Absicht mit dem Besuch dieses Workshops war eigentlich der, mal anzuschauen, wie funktionieren denn nun eigentlich die Dinge, die bei TextGrid entwickelt worden sind. Und da hab ich halt in den zwei Stunden ein bisschen was beobachtet und hab etwas mich abgemüht, einiges wenigstens ... also das mit dem Text-Bild-Editor zu verknüpfen. Und die Folge daraus ist unter anderem gewesen, dass ich zu einem Workshop, der jetzt in ein paar Wochen in M in I stattfindet, Herrn R und einen der technischen Mitarbeiter von TextGrid habe einladen können, wo wir auch das Problem Text-Bild-Koordination besprechen wollen.

**I18-3#I: Sie haben eben den Punkt erwähnt, Sie haben immer mal geschaut, inwiefern die digitale Datenverarbeitung ihre Erwartungen als Fachwissenschaftler praktisch erfüllen kann. Könnten Sie das noch ein wenig konkretisieren, welche Erwartungen Sie als Fachwissenschaftler an digital unterstützte Forschung haben?** B: Da muss ich mal sehen, wo ich da konkret ansetze... In der Phase der Entwicklung einer Edition hin auf eine Druckausgabe ging es vor allen Dingen darum, die ganzen Arbeitsschritte in der Edition auch so aufzugliedern und so zu strukturieren, dass die Datenverarbeitung dafür eingesetzt werden konnte. Aber nun nicht in erster Linie...also das sind Texterfassung, das sind Kollationierung, das ist Zusammenführung von Schichten der Entwicklung, das ist Apparaterstellung, das sind alles im Großen und Ganzen string-verarbeitende Prozeduren unter TUSTEP, das kennt man ja in T sehr gut, ist es nun damals so bereit gestellt worden, dass wir zwar einerseits unsere Anforderungen so strukturieren konnten, dass es mit bereits entwickelten TUSTEP-Programmen so zusammengepasst hat, immer wieder haben aber unsere Anforderungen die damaligen Entwicklungsschritte von TUSTEP bis an die Belastungsgrenze gefordert, was bedeutete, dass Schritt um Schritt auch etliche Funktionen innerhalb dieses Programmpakets so verändert wurden, dass wirklich das, was der Philologe brauchte, was der Editor brauchte, wirklich leistbar war.

I18-4#Das geht inzwischen natürlich weiter bzw. auch in anderen Richtungen. Eine wesentliche Anforderung, die man als Literaturkritiker, aber auch als Editor hat, gegenüber Handschriften, ist die, dass die Arbeitsabläufe, also die Schreibabläufe in einer Handschrift, dass die einerseits intellektuell analysiert werden müssen. Die sind nicht offensichtlich, die müssen analysiert werden. Dann müssen zeitliche Abfolgen postuliert werden und nach Möglichkeit bewiesen werden. Wenn ich aber das, was ich da analysiert habe, darstellen möchte und so umsetzen

möchte in der Präsentation, also an der Schnittstelle zwischen Benutzern und der Speicherung, damit eben andere das Gleiche nochmal durchdenken können und gegebenenfalls auch zu anderen Schlüssen, entweder zu größerem oder kleinerem Ausmaß kommen, dazu muss von Seiten der Datenverarbeitung, müssen einerseits Auszeichnungsverfahren entwickelt werden, also etwa genetische Auszeichnung, damit man Entwicklungsstufen, also Diachronie auch im Handschriftenblatt wirklich in Taggings umsetzen kann. Das ist das eine, um eine leistungsfähige Transkription zu haben, die gegebenenfalls auch stufenweise aufgerufen werden kann oder abgetragen werden kann. Aber auch das, was mich eben da besonders interessiert hat, bei dem bisherigen Angebot von TextGrid, nämlich was wird da gemacht und wie wird es gemacht, um diesen Zusammenhang zwischen dem Anschauen und dem Analysieren eben möglichst eng zu machen, also Bild und Transkription dynamisch miteinander zu verknüpfen. Das sind also ganz konkrete Leistungen, die da erforderlich sind innerhalb etwa der Infrastruktur. Software von ehemals H, jetzt N und diese ganze Gruppe von philosophischen Projekten, die als europäisches Projekt „Discovery“ sich genannt hatten, da ist also eine ganz eindrucksvolle Software zur Verwaltung einer ganzen Forschungsplattform entwickelt worden. Das Stadium, wo da Text- und Bildverknüpfung noch drauf verharret in dem Bereich, ist eine parallele Anschauung. Ich kann zwar parallel das Bild und die Transkription anschauen, aber die haben also bisher noch nicht eingebaut, was sich zumindest andeutet bei TextGrids Text-Bild-Editor, nämlich die aktivierbare Verknüpfung der beiden.

**I18-5#I: Inwiefern sind denn dann die Erwartungen an diesen Workshop erfüllt worden oder nicht, die Sie da hatten?** B: Die Erwartung, die ich daran überhaupt nur haben konnte, war der erste Anlauf. Ich meine, ich habe dann ganz konkret mit einem Stück Text, das ich mir selber zu recht gelegt hatte, eine einzelne Handschriftenseite aus J, die habe ich dann mit XML-Kodierung so versehen, dass der Text-Bild-Editor darauf ansprach. Aber da hab ich so Stunden lang dran rumgefieselt, um das wenigstens so hinzukriegen, dass ich sehe, ja gut, wenn ich das jetzt üben würde, würde ich das auch lernen. Aber das ist nun meistens in diesen Dingen so, dass ich soweit meine praktisch-technische Befähigung – wenn man das schon Befähigung nennen kann – vorantreibe, dass ich das im Prinzip irgendwie mal gemacht habe. Dass ich aber gerade in diesem Bereich aber immer schon nichts anderes für möglich gehalten habe, als eine Arbeitsteilung – nämlich zwischen den Leuten, die bis hin zu einer solchen praktischen Berührung, wie ich sie betreibe, die Sache verstehen und dann eben entsprechend differenzierter

darauf reagieren können, was die technisch versierteren Leuten in ihren Applikationen daraus tatsächlich machen.

**I18-6#I: TextGrid wird bei diesen Workshops ja auch als Gesamtidee vorgestellt, also als virtuelle digitale Forschungsinfrastruktur, die aufgebaut werden soll. Der Text-Bild-Link-Editor ist ja eigentlich nur eine Funktionalität. Zu diesem Aspekt würde ich eben auch gerne ihre Ansicht wissen, das wurde ja im Rahmen des Workshops angesprochen.**

B: Ja, also da muss ich mal sehen... Also bisher, auch aus den etlichen Gesprächen auch mit J und bei manchen von diesen Treffen von PHILTAG in Würzburg, die in den vergangenen Jahren geführt worden sind, da hieß es eigentlich immer, und ich habe das jetzt so mal gewissermaßen für bare Münze genommen, dass hier ein Werkzeugpaket, ein Gebilde von Tools sozusagen, entwickelt werden soll, um so eine spezifische Ausgabe wie die wissenschaftliche Edition zu unterstützen und zu leisten. Wenn das jetzt so stimmt, dann ist das ein sehr dezidiert umrissenes Ziel, aber gleichzeitig ein Ziel, was sich auf eine herkömmliche, und, das sag ich nicht abfällig, aber auf eine herkömmliche wissenschaftliche Tätigkeit, nämlich der Produktion von dem, was herkömmlich wissenschaftliche Edition genannt wird, hin ausgerichtet ist. Ich sehe allerdings das Potential des digitalen Mediums im Umgang mit Forschungsbereichen, die auf Textmaterialien gegründet sind, noch sehr viel weiter und komplexer. Und da sind sozusagen Werkzeuge, Tools in der Tat eine gute Vorraussetzung, Teilvorraussetzung, um so was überhaupt zu realisieren. Das Konzept einer echten Forschungsplattform, die dann z.B. die Bereitstellung von Materialien in ihrer originalen Anschauung, in ihren Transkriptionen als einen Strang hat, dann aber eben die vielfältigen Möglichkeiten der Kommentierung, und das kann entweder im herkömmlichen Sinne oder nicht im herkömmlichen, aber so wie man noch im Bereich der Editorik Kommentierung verstünde, nämlich Stellungnahme zu spezifischen Stellenauswertungen, das kann aber auch in die Richtung von Aufsätzen, Monographien oder dergleichen gehen, die dann in ein größeres Netz geknüpft werden, dessen, was sich alles auf diese Grundlagenmaterialien bezieht. Und da sehe ich nicht, dass das nun etwas ist, was sich TextGrid auf die Fahne geschrieben hätte und deshalb orte ich TextGrid einfach im Verhältnis zu solchen anderen Optionen, die eben anderweitig gedacht sind. Ich komme grade von einer Konferenz in den Vereinigten Staaten „The shape of things to come“ in Charlottesville, Virginia, wo aus den verschiedenen Bereichen genau solche komplexen Forschungsplattformen als dezidiertes Zukunftsziel auch vorgestellt wurden. Es sind einerseits überall alles noch Zukunftsziele, weil sie nicht so weit sind, wie sie bereits gedacht sind, manchmal... Aber das konnte also Geographie, auch historische Geographie und

historisch-politische Geographie und Topologie sein. Das konnte die Bereitstellung eines weiten Spektrums von homerischen Texten 00:17:26 und ihrer Rezeption und Verbreitung und Abwandlung über die Jahrhunderte, wenn nicht Jahrtausende gewesen sein. Das waren dann auch editionsnähere Dinge, also dem traditionelleren Editorischen nähere Bedingungen. Und das sind alles zweite oder dritte Generationsunternehmungen, die gewissermaßen das weiterführen, was gerade auch in den Vereinigten Staaten mit dem Rosetti Archive, mit dem Blake Archive als erste Materialdarstellung -und bereitstellung begonnen worden war; und auch inzwischen mit ganz neuen Strukturen. Da, im Vergleich zu solchen Dingen, generiert sich TextGrid als etwas sehr Brauchbares in einem eingeschränkten Sektor.

**I18-7#I: Also, das ist der Eindruck, den Sie bisher von TextGrid gewonnen haben?**

**Interessant. Also würden Sie diese anderen Potentiale, die sie jetzt von anderen Forschungsumgebungen beschrieben haben, vor allem in der Verknüpfung von Inhalten sehen auf verschiedenen Ebenen, also Kommentierungen im Bereich der Edition, also ein inhaltliches Netzwerk von verschiedenen Datenressourcen?**

B: Wobei gerade im Hinblick auf das, was man herkömmlich Kommentierung nennt, meinem Verständnis nach sich ein grundlegendes Umdenken und Neudenken sich empfehlen würde. Solange man originale Materialien, oder sagen wir mal, das, was zunächst materiell vorliegt im kulturellen Erbe, solange man das darstellt in der herkömmlichen Edition als Text und dann anlagert so als die Kommentare und so, dann tut man das bisher, weil sich das im Buch auch so anbietet, im Wesentlichen linear und so würde ich sagen string-orientiert – vom Anfang bis zum Ende. Und es gibt aber natürlich in der herkömmlichen Buchform, ob das nun Editionen sind oder auch ganz allgemein, da gibt es auch das Register, das versucht, dieser Linearität etwas entgegen zu wirken und sich ganz wesentlich drauf verlässt, dass der Benutzer das Ganze auf seiner eigenen Hard-Disk da oben verarbeitet und die Verbindung herstellen kann. Das alles kann der Computer nicht. Also muss man zunächst mal das Kommentieren als eine neue Art der Strukturierung, also als eine Diskursschicht innerhalb von dem Studienobjekt Edition verstehen. **I: Mit einer eigenen Produktion von Kohärenz dann...** B: Ja Kohärenz und Korrelation, so dass das von vorneherein..., also benutzen wir ruhig den alten Ausdruck Hypertext, der relationierten Verknüpfung. Wir hatten hier in München mal eine Dissertation von einem Kollegen „Textkritik als Grundlage der textbasierten Wissenschaften“, es hieß irgendwie anders..., und da ist unter anderem diese eine Edition entstanden, die sich Gedanken gemacht hat um die Anlage einer Kommentierungsebene oder eines Kommentierungsdiskurses in einer digitalen Edition. Und was

dabei so als wichtiger Punkt für mich rauskam, war das Setzen von gewissermaßen von Kommentierungsnetzlayern durch den Editor selber, den Kommentator, Editor selber. Einen Themenbereich, den man definieren muss und dann daran knüpfen muss, was in den gesamten Textmaterialien dazu hingehört, was einerseits auf diesen Schnittpunkt hinbezogen ist und wo man von jedem einzelnen Knotenpunkt dann auch wiederum die Querverbindungen hat, dh. dass man wieder so ein Netz... **I: ...ein semantisches Netz in der Kodierung hat? Interessant.**

**I18-8#Bei dieser Vernetzung von Inhalten soll es ja bei der Entwicklung vieler virtueller Forschungsumgebungen nicht bleiben. Es soll ja auch Kollaboration stattfinden, also die Vernetzung von Arbeitsprozessen. Welche Bedeutung messen Sie diesem Aspekt zu? Wie ist da ihre Meinung?**

B: Gut, dass Sie diese Frage jetzt stellen, die hab ich vorhin übersehen. Das ist einer der spannendsten Punkte dessen, was ich da in der Entwicklung sehe. Diese Infrastruktur, die ursprünglich durch dieses H entwickelt wurde, die hatte von vornherein etwas ganz wesentliches, nämlich die dynamische Kontextualisierung als Grund-/Nebenstruktur, das in der Infrastruktur die Entsprechung wäre zu dem, was ich eben gesagt habe, zu Kommentierung „neuer Art“ gesagt habe. Was sie inzwischen entwickelt haben, das sind Satellitenplattformen, also die Möglichkeit – sagen wir mal – oder erstellen zunächst mal eine Forschungsplattform, die man bei irgendeinem vertretbaren Entwicklungsstand auch öffnet und dann aber von vornherein vorsieht, dass von seinem einzelnen Arbeitsplatz, von ihrem Arbeitsplatz der/die Forscher/in eigene Dinge beiträgt, diese Forschungsplattform entweder für sich daran weiter was anlagert oder eben das selber für sich Angelagerte in irgendeiner Form der Zentrale wiederum zur Verfügung stellt, wo da in einem Peer-Reviewing-Prozess etwa das dann eingegliedert wird. D.h., dass auch in dieser Weise die Arbeit mit einer solchen Forschungsplattform nicht lediglich ein rezeptives Benutzerverhalten ist, sondern ein Mitarbeitsverhalten zur weiteren Entwicklung. Und dazu ist natürlich so eine technische Möglichkeit einer solchen Satellitenplattform, die eben korreliert, ist natürlich erforderlich. Das werde ich auch demnächst sehen, wie das funktioniert, aber ich habe mir das schon vielversprechend erklären lassen, wie das funktionieren wird oder auch schon funktioniert.

**I18-9#I: Das wäre jetzt ein Potenzial in dem Bereich, das es geben wird. Damit verknüpft ist ja auch immer die Sicht, dass man sagt, wo sind die Hemmnisse, die möglichen Schwierigkeiten so etwas aufzubauen. Wo würden Sie die sehen?** B: Naja, das ist natürlich eine Frage, die schwer von vornherein so zu beantworten ist, dass man dem Ganzen nicht den Impuls und den Schwung nimmt. Grundsätzlich ist da eine Voraussetzung dafür, dass sich

Forschergemeinschaften bilden und das ist oft einmal die Idee, dass die Anreicherung einer anfänglich bestehenden Forschungsplattform durch Beiträge, die dann direkt dazugefüttert werden, auch wirklich möglich wird. Dafür ist natürlich eine Voraussetzung, wie ich vorhin sagte, Peer Review. Und um Peer Review dabei zu haben, bedeutet, dass sich eine Forschergemeinschaft auch wirklich von Personen konstituiert, übers Netz und international grundsätzlich, die das also gemeinsam macht. Das wird eine Umorientierung des Forschungsverständnisses gerade in den Geisteswissenschaften einfach erforderlich machen, nämlich weg vom abgeschotteten Individualbereich zum kommunikativen gemeinschaftlichen. Schwierigkeiten, über die wird ja immer wieder geredet. Ich kann nicht beurteilen, wie lange die noch so virulent sein werden: Anerkennungen von Leistungen im Zusammenhang mit irgendwelchen Qualifikationsprozessen, ob das Magisterarbeiten, Promotionen, Habilitationen irgendwelcher Art sind oder wie auch immer. Da wird sich viel ändern müssen. Ich stecke nicht genügend in den Naturwissenschaften drin, um zu beurteilen, ob die da viel weiter sind, was unsereiner gerne so meint, dass das so sei. Aber das, was wir glauben was sich da abzeichnet, dass es da stärker diese Gruppenbildungen gibt, die gemeinsam für Forschung und Forschungsaustausch stehen, das sind Dinge, die sich entwickeln müssen. Da kann man sicherlich sagen, dass da eine Anfangsschwierigkeit auf jeden Fall darin besteht, bisherige Strukturen auf der realen Ebene etwa zu lösen oder zu verändern.

**I18-10#I: Und wenn das gelingt, inwiefern sehen Sie denn Möglichkeiten durch digital unterstützte Forschung auch neue wissenschaftlichen Erkenntnisse zu erlangen, zu neuen Forschungsfragestellungen vielleicht zu kommen, Methoden, Erkenntnisprozessen?** B: Ich weiß nicht, ob das digitale Medium in den Geisteswissenschaften der auslösende Faktor, sage ich mal, ist. Ich kann mir nicht vorstellen...Ich kann mir eigentlich in keiner Wissenschaft vorstellen, dass es das Medium ist, in dem man die Forschung dann betreibt und verwaltet, dass es die innovativen Schübe gibt. Das sind immer die Leistungen und die Leistungsfähigkeit, sei es einer Gruppe, sei es eines Individuums. Aber oft ist es ja in der Tat so, dass, wenn eine Gruppe harmonisch zusammenarbeitet, dass da sowieso mehr rausschaut, nicht ausnahmslos, aber sehr oft, als wenn einer im sprichwörtlichen „stillen Kämmerlein“ oder auf den langen Spaziergängen zu denken meint.

**I18-11#I: Und inwiefern sehen Sie Möglichkeiten durch den Zugriff auf große Datenmengen, Datenstrukturen – also die Vernetzung von Inhalten – und eben auch die eventuell neuen Möglichkeiten durch andere Zugänge zu Daten... Sehen Sie da eine**

**Möglichkeit, zu neuen Erkenntnissen zu kommen, oder sehen Sie da vielleicht nur eine Effizienzsteigerung?** B: Ich glaube, das eine schließt das andere ja nicht aus. Zunächst mal die großen Datenmengen: Bei den Linguisten bilde ich mir ein, dass die sehr schnell wissen, was die mit großen, also quantitativ großen Datenmengen an Sprache, an Sprachstrukturen anfangen können. Grundsätzlich können das Literaturwissenschaftler bei der Art ihrer Fragestellung schon auch. Ein Beispiel, was ich mir immer ausmale, was mir bisher noch nicht gelungen ist auch nur im Anfangsstadium ins Wirkliche umzusetzen, ist der amerikanische Autor H, der ein reichliches literarisches Oeuvre hinterlassen hat und in den 30, 40 Jahren – in den 40 Jahren ungefähr, in denen er geschrieben hat, viele seiner Texte mehrfach publiziert hat. Er konnte keinen seiner Texte wieder in die Hand nehmen, ohne ihn zum Teil erheblich zu ändern. Nun, das weiß man, das hat man auszugsweise auch mal untersucht, aber die Kollationsarbeit, die nötig wäre, um das Material an Text, das er hinterlassen hat, Wort für Wort durchzugehen und daraus dann auch noch Schlüsse zu ziehen, die ist verständlicherweise bis heute nicht geleistet worden. Was ich mir vorstelle, dass man alle diese Sachen, alle diese Texte in ihren jeweiligen Originalformen eingibt und ein Kollationswerkzeug nun tatsächlich, an dem ja im Hintergrund von TextGrid ebenso gearbeitet wird wie vor dem Hintergrund von L, da bin ich mit beiden so im Gespräch, was sich da so tut...Aber, dass man das mit einem Kollationswerkzeug so versieht, dass man den gesamten Bereich, dieses gesamte Konvolut durchkollationieren kann. Die Kollationierung dann müsste man auch nach verschiedenen Gesichtspunkten vordefinieren können und da könnte ich mir auch vorstellen, dass neue Erkenntnisse – sagen wir mal – über die Denkweise des Autors, über – sagen wir – besser begründete Aussagen, über stilistische Veränderungen, den Zusammenhang zwischen stilistischen Veränderungen und Weltanschauungsveränderungen, die sich eben auch nachweisen lassen, dass das wirklich möglich ist und dass da in der Tat... Das wäre mal ein Beispiel, an dem man sagen kann, die große Datenmenge würde auch neue Forschungsfragen ermöglichen und würde unter Umständen neue Erkenntnisse befördern. Und deshalb ist auch allgemeiner, auf die größere, die ganze deutsche Klassik oder die ganze Literatur des Expressionismus oder so was, entsprechend zunächst mal verankert und vernünftig ausgezeichnet, dass man da auch drankommt an die Fragestellungen, dass eines Tages auch jemand mit intelligentem Zugang auch in dem Material nicht ertrinkt, sondern damit was machen kann.

**I18-12#I: Anderes Beispiel, haben sie ja eben auch schon bei der Abbildung der Textgenese beispielsweise, könnten Sie sich nicht auch vorstellen, dass da etwas sichtbar wird, was**



**vorher vielleicht nicht so klar erkennbar war?** B: Ja. Eine Fragestellung, auf die, wie man sieht, dass sich da manchmal wirklich konkrete Antworten ergeben können, ist möglich in Bezug auf die Mehrschichtigkeit von Entwurfsmaterial, nämlich die, was für Gedankenprozesse eigentlich hinter diesen Veränderungen abgelaufen sind. Das ist eigentlich immer nur implizit benennbar, aber wenn man die Differenzen der Schichten der Arbeit und des Zuwachses der Änderungen, der Verkürzung von einmal Geschriebenem, wenn man die beobachtet, sind das nicht nur Veränderungen, die einen Text zu einem anderen machen, sondern wenn man sie genügend eingrenzen kann, kann man sagen, das ist da und das ist da und was ist gewissermaßen der interpretierbare Schluss aus dieser Differenz. Und da kommt man eben auf Dinge, die mindestens so sehr aus dem dauernden Mitdenken und Lesen, dauernden Wechsel von Lesen und Schreiben beim Autors selber ergeben, wie aus dem, was das einmal Geschriebene sozusagen fast automatisch generiert als Alternative zu sich selbst. Und das ist schon...Ich meine es ist... Die Datenbearbeitungen in den Geisteswissenschaften und auch die Materialität von Überlieferungen, zunächst mal gegründet, ist eben nicht nur ein Werkzeug, sondern ist ein Forschungsort. Ich meine, gerade im Hinblick auf Editionen habe ich hin und wieder schon mal gesagt, Bücher sind und bleiben das, womit wir Texte lesen. Aber Editionen ist das, wo wir Werke, die ja aus zeitlich geschichteten Mehrfachtexten bestehen, studieren. Also die Edition, und gerade die Edition im digitalen Medium, ist ein Forschungsinstrument. Die Edition als gedruckte Ausgabe ist ein Leseangebot. Und diese Trennung hat man bisher nicht machen können, weil es immer wieder das Buch war und sein musste natürlich.

**I18-13#I: Sie sagten gerade: ein Forschungsort. Das fand ich besonders interessant, das deutet ja auch darauf hin, dass das eine verortete, aber auch räumliche Wahrnehmung des Ganzen ist, also Forschungsumgebung sagt das ja auch aus. Welche räumlichen Aspekte sehen Sie da?** B: Ja, das Paradoxe ist, dass das alles so virtuell ist. Das heißt... nein ich nehme an, dass ich den Ort anders in einem Gehirn konstruiere als ich das gegenüber in einem Buch so machen würde. **I: Wie wäre das dann?** B: Ja, wie wäre das? Also der Impuls, mich wirklich an diesem Ort aufzuhalten, mich in ihm zu bewegen, der kommt ganz entscheidend aus der relationalen Anordnung all dessen, was da digital verfügbar gemacht wird. **I: Also die Textverknüpfung, das gibt ja schon eine gewisse Räumlichkeit.** B: Ja, also sowohl Verknüpfung über ...ja wie nennt man das? ... die Wortbestände, die verbalen Verknüpfungen und semantischen Verknüpfungen. Also ganz entscheidend sind semantische Erschließungen, was im Grunde genommen bedeutet, dass die alte Regeledition interpretierend so natürlich nicht

mehr gelten kann. Man kann sich dann immer noch fragen, wie weit man mit dem, was man da bereitstellt, also auch vorgeben, sozusagen dekretieren will, das etwas das und das bedeutet und nichts anderes bedeuten kann. Das wird wohl auch weniger der Fall sein, weil diese Art der Autokratie der wissenschaftlichen Leistungen insgesamt durch das digitale Medium wohl reduziert wird. Also ich sage immer wieder Editionen, weil dass das ist, wo ich mich am meisten zuhause fühle, aber Editionen können nicht mehr das sein, was sie aus dem 19. Jahrhundert kommend, gerne waren, nämlich „Ich weiß es, und das gebe ich euch jetzt“.

**I18-14#I: Aber so ein Forschungsort, also wenn man als Forscher an so einem Forschungsort tätig ist, inwiefern kommt dem Bedeutung zu, diesen Forschungsort auch an die eigenen Arbeitsweisen anzupassen zu können?** B: Ja, natürlich so wie, wenn ich meinen Garten umgrave.

**I: Ja, genau. Wie würden sie das jetzt im Bezug auf digitale Forschungsumgebung für Editionen umsetzen? Was würden Sie sich da jetzt vorstellen?**

**Was müsste anpassbar sein?** B: Wenn ich zurückgreife, auf das, was ich vorhin so angedeutet habe, und das ist auch was, worüber ich in jüngerer Zeit zu ein paar Gelegenheiten geschrieben habe, nämlich, dass eine Edition ein Geflecht von im Prinzip gleichberechtigten Diskursen ist. Dann würde das auch bedeuten, dass ich je nach momentanem Interessenszugang dem Diskurstext, dem Diskurs der historischen Sachanmerkung, dem Diskurs der Erörterung von Sinnbereichen, also semantischer Teilbereiche oder so was, jeweils separat zuwenden könnte, also dass ich immer wieder umschichten kann, von wo ich hergehe. Was ganz interessant ist, ist da z.B. der gesamte Nachlass von Ludwig Wittgenstein. Wittgenstein hatte kaum was publiziert, hat aber 20.000 Seiten an Material hinterlassen. Und das ist alles digitalisiert worden, das ist alles transkribiert worden da in Bergen. Und da sind etliche Konvolute dabei, aus denen postum sehr respektable Wissenschaftler Schriften Wittgensteins konstruiert haben, ganz im Gegensatz zu der Schwester von Nietzsche, die irgendwie ein irrsinniges Falsifikat, aus dem, was ihr Bruder gefunden hat, gemacht hat. Aber trotzdem sind das keine Schriften Wittgensteins, die die rausgegeben haben. Das bedeutet aber, dass man an dem Wittgenstein-Nachlass, so wie er digital an dem Forschungsort Bergen Wittgenstein zu Verfügung steht, dass man da nicht rangehen kann als einen Text, den er konstruiert hat. Sondern man muss von vornherein an ihn rangehen z.B. unter dem Gesichtspunkt „Musik“. Und im Übrigen ist er wahrscheinlich sowieso ein musikalischer Komponist in seiner Philosophie, aber davon mal abgesehen. Aber er sagt ja auch oft was zur Musik und zum Verhältnis zur Musik und Erkenntnis und was nicht alles. Das heißt ich kann eine Organisation nach Sinnbereichen als meine primäre Zugangsebene definieren. Und

die Möglichkeit im digitalen Medium solche Zugangsebenen unterschiedlich zu benennen und sozusagen umzuschichten.... **I: Also semantisch entsprechend auszuzeichnen und dann Perspektiven... Das ist interessant.** B: Ja eben, eben. Und solche Möglichkeiten...Das ist ja eigentlich auch die große Chance heutzutage, sich ohne – sagen wir mal – übermäßige Einschränkungen durch „So haben wir es immer schon gemacht“ einfach Möglichkeiten zu überlegen und entsprechend eben auch zu sagen: Das wäre eine Zugangsmöglichkeit, ich will sehen, das ich entweder konkret oder latent Auszeichnungen schon so verbe, dass das nicht wieder völlig im Orcus verschwindet.

**I18-15#I: So eine Möglichkeit der semantischen Filterung oder Perspektive wäre ja auch eine Möglichkeit der Orientierung. Das ist nämlich eine weitere Frage, wenn man so ein riesiges Datennetz hat, es gibt ja den schönen Begriff „lost in hyperspace“. Das wäre nämlich auch meine Frage gewesen, wie Sie sich vorstellen, dass man sich da als Forscher da orientiert oder als Nutzer?** B: Das mit dem „lost in hyperspace“ ist so eine Sache. Das fängt ja oft schon damit an, dass man schon eigentlich gar nicht mehr weiß, was die rein technischen Vorkehrungen sind, das ist so wie „lost in the bush“ in Australien. Das ist eine subjektive Erfahrung, die ganz triviale Gründe haben kann. Aber sie kann natürlich auch die Gründe haben, dass ein Potential von vornherein überhaupt nicht erschließbar gemacht worden ist. Was man auch nicht jemandem zum Vorwurf machen kann, wenn eine Sache insgesamt akzeptabel gemacht ist. Weil – es kann keiner an alles denken. Aber ich kann da eigentlich jetzt nur sagen: So könnte ich mir vorstellen... Also ich kann einige Dinge benennen, von denen ich es wichtig fände, dass man sich die mal klar macht und dass man mit großem Respekt vor überkommenen Konventionen, von Verfahrensweisen trotzdem versucht, offen Alternativen zu denken und dann abzuschätzen, wie wichtig die sind, wie bedeutungsvoll und dann eben auch da Schneisen zumindest vorzubereiten.

**I18-16#I: Abschließend noch eine Frage: Was würden Sie noch als größtes Manko virtueller Forschungsumgebungen und solcher Entwicklungen wie TextGrid sehen und was als größtes Fortschrittspotential? Kurz zusammengefasst.** B: Also über die Fortschrittspotenziale, meine ich, haben wir jetzt so viel gesprochen, ich glaub, dazu will ich jetzt nix sagen. Und ein großes Manko, was ich bisher sehe, ist, dass die Energien mit einem solchen Nachdruck und oftmals mit zu großer Ausschließlichkeit auf die Produktion digitaler Reservoirs und interner digitaler Strukturen gelegt wird, dass die Benutzer und Mitbenutzer Mitwirkungspotenzial an der Schnittstelle des Produkts und seiner Nutzung eben zu wenig

bedacht ist, und dass es noch viel zu wenig – wie soll ich sagen – präzise und gleichzeitig flexible Benutzerinterfaces gibt. Da wird es dann oft ziemlich holprig immer wieder, wenn man das benutzen will, obwohl da drunter etwas so bemerkenswertes schon liegt. **I: Ja, also dass praktisch der Datenspeicher und seine Strukturen schon da sind und dass aber...** B: ...die Nutzung und Mitbenutzung und Mitentwicklung, dass die einfach zu wenig beachtet sind. **I: Also dass auch Fachwissenschaftler ohne Programmierkenntnisse oder Kenntnisse von XML darauf zugreifen können.** B. Ja. **I: Ja gut, wäre ja auch eine Grundvoraussetzung, dass solche Gemeinschaften entstehen könnten.** B: Eben und ich meine, da fragt sich, gerade im Hinblick auf TextGrid, die verständliche und auch eindrucksvolle Konzentration auf den Toolaspekt befördert nicht eigentlich diese Nutzung desjenigen, der nicht von Grund auf alles technisch durchschaut, beherrscht und das Gold auch in den großen Tiefen entdeckt. **I: Ja, also wäre es besser da einen einfachen Zugriff auf die Infrastruktur zu zeigen als diese komplexe Toolsammlung, meinen Sie?** B: Ja, unter Umständen auch. Aber ich meine jetzt ganz konkret auch, was in dem Workshop alles an Notwendigkeiten, überhaupt erstmal da Fuß zu fassen, einem innerhalb von, wenn man Glück hatte, innerhalb von 20 Minuten beigebracht wurde, was man vielleicht nach eineinhalb Stunden noch nicht begriffen hätte, das ist verständlich, auch aufgrund der ganzen Sicherheitsbedürfnisse und Abstufungen der Nutzungsgefahren sozusagen. Aber es ist schon eine Hürde, eine ganz beachtliche. Ich meine, das ist mir da nicht alleine ... Einmal als ich eine Demonstration aus dem Handgelenk von Lou Bernard von TEI P5 mitkriegte, ich war restlos verloren. Das liegt natürlich z.T. daran, dass bei mir, dass muss ich einfach eingestehen, dass geht bei mir nicht so schnell, wie es vielleicht vor 30 Jahre gegangen wäre. Aber selbst da bin ich mir nicht sicher, ob es so schnell gegangen wäre, und ich sehe natürlich jüngere Leute – das sind meistens jüngere Leute, aber nicht ausschließlich – die also sehr intensiv auch praktisch gearbeitet haben, dass das irgendwie bei denen schneller geht. Aber ich weiß auch, bei mir geht das auch schneller als bei manchen meiner Freunde, weil ich natürlich auch ein paar Jahrzehnte gearbeitet habe und so, nicht wahr? Also, da muss man unter Umständen noch ein bisschen Feldforschung machen und sich dann überlegen, wie man diese im Grunde genommen trivialen, aber halt doch empfindlichen Hürden so überspringbar macht, dass es keiner merkt, dass er sie übersprungen hat. **I: Ja, herzlichen Dank!** B: Ja, bitte!
