# Supplementary material
Source: publisher site journal article supplement (https://www.degruyterbrill.com/publication/isbn/9783110463927/downloadAsset/9783110463927_Interviews.zip)
Supplement: Supplementary file 11 [file I19.pdf › Interviews/I19.pdf]

**I19-1#Interviewer: Inwiefern arbeiten Sie im Bereich E-Humanities? Und wie würden Sie ihre Erfahrungen in dem Bereich beschreiben?**

Befragte/r: Also in eHumanities habe ich eigentlich noch ziemlich gar keine Erfahrungen. Bis auf dass ich ganz normal das Internet benutze für Quellenforschung und so etwas, aber nicht jetzt..., darüber hinaus geht es eigentlich nicht. **I: Welche Erwartungen hatten Sie dann an den Workshop bzw. an TextGrid?**

B: Ach ich war da eigentlich ganz offen. Ich wollte einfach mal mich da auf den neuesten Stand bringen und schauen, wie es da mit der Entwicklung aussieht, mit elektronischer Edition. Aber ich hatte da eigentlich gar nicht so spezifische Erwartungen, weil ich da eben noch sehr unbedarft bin und einfach schauen wollte, wie da die Entwicklung ist. **I: Sie haben also noch gar nicht mit digitalen Editionen oder in dem Bereich was gemacht?** B: Nein.

**I19-2#I: Und was für einen Gesamteindruck hatten Sie nach dem Workshop?** B: Also ich fand, glaub ich, dass das Ziel des Ganzen ein sehr interessantes und auch wichtiges ist, weil es enorm die Edition und die editorische Arbeit erleichtert, wenn man eben auch gerade einen leichten Zugriff auf Quellen hat. Ich glaube, es ist halt noch so ein bisschen in der Entwicklung, das war jetzt auch so ein bisschen mein Eindruck gewesen. Aber das Ziel ist aber, glaube ich, ein sehr gutes, also gerade eben für die Edition, für die germanistische oder was auch immer. Weil es einfach Arbeitsprozesse enorm erleichtert.

**I19-3#I: Inwiefern können Sie sich vorstellen, in ihrer zukünftigen Arbeit das zu benutzen?**

B: Ich könnte es mir generell, glaube ich, schon vorstellen. Ich bräuchte eben ein konkretes Beispiel oder einen konkreten Fall. Aber ich sehe es auch immer an der editorischen Arbeit, die man so macht, dass es eben einfach noch zum Teil enorm schwierig ist, gerade auch auf Quellen oder Datenbanken zuzugreifen, wenn man irgend einen Text braucht, der eben nicht so populär ist, und dann steht er doch wieder nicht im Internet oder man findet ihn nicht und man muss dann doch wieder in die Bibliothek gehen. Das finde ich eben das Interessante und das würde enorm die Arbeit erleichtern.

**I19-4#I: Welche Funktionen waren denn völlig neu für Sie?** B: Jetzt bei dem Workshop? **I: Ja, an dem TextGridLab? Oder fragen wir lieber so: Was war Ihnen bekannt an Funktionen, wie man digital unterstützt arbeiten kann und was war neu für Sie?**

B: Also eigentlich war schon alles neu, weil alles, was ich mit Edition bisher gemacht habe, nur mit Word gearbeitet hab und gar nicht mit diesem XML, was ja auch viele benutzen. Also, es war eigentlich alles neu. Wir haben ja immer nur so ein bisschen gemacht, aber auch dieses..., die Quelle eben

auf dem Bildschirm zu haben und sich dann da das Transkribieren zu ermöglichen, das habe ich so noch nicht gemacht, weil ich das immer nur mit den Originalen gemacht habe, also mit nichts Digitalisiertem.

**I19-5#I: Welche Funktionen könnten Sie sich denn als besonders wichtig vorstellen? Wenn Sie sagen, Sie haben sozusagen „offline“ schon editorisch gearbeitet, wenn auch mit Word, Textverarbeitung. Was würden Sie für die wichtigsten Funktionen halten, die dadurch möglich werden können?**

B: Ja vielleicht wirklich, einmal was wir da gemacht haben, dieses Lesen. Dass man eben auf schwierige Stellen, so gut wie es geht und so klar wie es geht vergrößern kann, um den Text wirklich ganz präzise lesen zu können. Und was jetzt aus meiner eigenen Arbeit sich ergibt, ist einfach das Recherchieren und Finden von Quellen. Wenn das in einem Programm drinnen wäre, und man wirklich ganz schnell weltweit irgendwie auf die entscheidenden Quellen, und seien sie auch so unwichtig und unbekannt, wenn man darauf zugreifen könnte schnell, das fände ich eine enorme Arbeitserleichterung. **I: Also eine Bündelung von Ressourcen, die man nicht vorher schon recherchiert haben muss?** B: Ja, wenn das möglich wäre, das wäre – glaub ich – ein Traum für jeden Herausgeber oder so, oder Redakteur.

**I19-6#I: Wenn das für Sie jetzt etwas völlig neues war, dann wäre interessant zu erfahren, wie leicht erlernbar fanden Sie das? Wie fanden Sie die Bedienfreundlichkeit?**

B: Ach, das war eigentlich... Wir haben ja jetzt nicht so viel gemacht, aber das war einfacher als ich gedacht habe, eigentlich. Ich glaube, da ist man schnell drin. Ich finde so Computersachen, das sind immer Sachen, die lernt man nur, indem man sie tut. Das war eigentlich... also da hatte ich keine Schwierigkeiten und stelle mir das auch nicht besonders schwierig vor. **I: Haben Sie auch ein bisschen rumprobiert oder haben Sie nur genau nach Anweisung...?**

B: Ich hab da schon ein bisschen selber rumprobiert, aber ich bin auch nicht groß darüber hinausgegangen, was der Herr Rettelbach gesagt hat, was wir da tun sollen. **I: Sind Sie dabei auch auf Probleme gestoßen?**

**Wo hat es noch gehakt? Können Sie sich daran noch erinnern?** B: Da kann ich jetzt gar nichts so zu sagen, da hätte ich mich noch einfach mehr und noch länger mit beschäftigen müssen. Das war in dem Workshop vielleicht dann zu kurz. Also, da hätte ich das dann an einem eigenen Beispiel durchspielen müssen.

**I19-7#I: Welche Potentiale sehen Sie denn in dieser Infrastruktur, jetzt zusätzlich zu dem Datenzugriff, also zu den Möglichkeiten an Daten heranzukommen? Also Stichwort Vernetzung, was bedeutet das für Sie?** B: Also, ich glaube, dass ist so mit das Entscheidende,

was ich eben auch schon gesagt habe. Also, wenn das möglich ist..., also meinen Sie jetzt auch Vernetzung unter den Wissenschaftlern selbst? Ja, ich denke auch, das ist auch wichtig. Wobei es wahrscheinlich auch ein Problem sein wird, dass viele Wissenschaftler ihre eigenen Daten erstmal nicht preisgeben wollen, solange Sie es nicht veröffentlicht haben. Ich denke, da wird keiner mit seinen eigenen Sachen rausrücken. Es sei denn, man arbeitet doch irgendwie in einem gemeinsamen Projekt. Aber da ist es natürlich auch erleichternd, wenn man an verschiedenen Orten sitzt, ist ja keine Frage. Und ja, ansonsten – klar, dieses Quellen finden, wenn man auf jedes Archiv zugreifen kann auf der Welt, das ist ja einfach nur unglaublich, denk ich.

**I19-8#I: Also entscheidend für Sie ist die Vernetzung von Datenzugriff. In dieser Grid-Infrastruktur kommen ja dann jede Menge an Daten zusammen. Da stellt sich natürlich die Frage: Wie kann man sich da gut zurechtfinden? Wie stellen Sie sich das vor? Wenn Sie sagen, es wäre natürlich toll, wenn man auf alles gebündelt zugreifen kann?** B: Ja, das ist eine schwierige Frage. Und ich glaube, es ist auch kein aktives Projekt dabei, das über TextGrid läuft. Aber ich kann mir schon vorstellen, ...kann man das nicht so hinbekommen? Da müssten dann die Bibliotheken und Archive mitarbeiten, dass man, wenn man das in einem gemeinsamen Programm unterbringt, dass man dann die entscheidenden Punkte kriegt. Aber das ist wahrscheinlich schon noch mal ein größerer technischer Aufwand, um das hinzubekommen, aber das müsste ja eigentlich das Ziel sein, dass das funktioniert, wenn man diese Vernetzungsmöglichkeit hat, wenn man das aufbaut. Also wie gesagt, ich kann nur sagen, das wäre das Allerentscheidenste – weil ich schon selber so verrückt geworden bin, bei der Quellensuche. Und dann hat man mal einen Hinweis im Internet, aber man kommt eben doch nicht weiter und man müsste eben doch vor Ort fahren und da selber nachrecherchieren. Und wenn man das im Netz hätte, das wäre schon super. Das ist doch bestimmt möglich, das zu machen, oder?

**I19-9#I: Ja, es soll ja eine Funktion darstellen, in der Tat. Welche Tools bzw. Funktionalitäten würden Sie denn noch wichtig finden, die bei der Vernetzung von so vielen Daten eine Rolle spielen könnten?** B: Das, was ich jetzt eben gesagt habe, als das Wichtigste und dann halt vielleicht der Austausch untereinander, unter den Wissenschaftlern... und sonst? Ich glaube, das ist... sonst würde mir jetzt gar nichts einfallen sonst. **I: Wie stellen Sie sich den Austausch denn genau vor? Sonst könnte man ja auch sagen, man schickt sich E-Mails?** B: Ja, das stimmt. Gut, am wichtigsten ist es ja wahrscheinlich, wenn man an einem gemeinsamen Projekt arbeitet, weil man dann auch das gemeinsame Programm und das gemeinsame

Instrumentarium dafür dann hat. Und dann ist es vielleicht leichter, zu agieren, weil eben dann TextGrid vielleicht auch mehr Möglichkeiten bietet als so ein Word-Programm, dass man da vielleicht auch einfach mehr Anwendungen hat für die Edition. Das Problem ist wahrscheinlich eben schon, wenn man insgesamt sich austauschen möchte und mit Leuten in Kontakt treten möchte, die an einem anderen Projekt arbeiten, ob die dann halt ihre Infos so rausrücken. Das sehe ich, wenn man die Wissenschaftler von heute kennt, oder sie waren ja schon immer so, das ist ein Problem, das einer seine Daten preisgibt, bevor er sie nicht wirklich einer größeren Öffentlichkeit vorgestellt hat. **I: Also sehen Sie die Chancen eher projektintern?** B: Ja genau.

**I: In dem Projekt, an dem sie arbeiten werden, gibt es da die Situation, dass jemand an einer anderen Universität sitzt, der daran mitarbeitet?** B: Ja, das gibt es auch schon, aber die meisten sitzen schon zusammen vor Ort. Aber wenn einer mal woanders ist, das kommt schon vor. Aber ja, ich glaube, aber man darf auch nicht vergessen, die gemeinsamen Treffen sind schon wichtig. Aber ich denke, man könnte das auch schon ausbauen. Also das könnte man über so ein Programm bestimmt noch verbessern, die Kommunikationsmöglichkeiten. **I: Wie wird das denn bisher gelöst?** B: Also jetzt, bei dem aktuellen Projekt, einfach durch Sitzungen, durch regelmäßige Redaktionssitzungen und durch das persönliche Gespräch, dass man einfach vor Ort ist und gemeinsam die Probleme durchspricht. Gut, es liegt natürlich auch immer ein bisschen an der Quellenlage. Wenn man das meiste eben auch vor Ort hat, dann ist es vielleicht nicht so extrem notwendig. Es ist eher so, wenn man mal einen Text recherchieren muss, der im Kommentar steht und den man nicht gleich findet, da könnte man wahnsinnig werden, und das fände ich einfach so schön, wenn ich den dann einfach gleich hätte über so ein Programm und den auch einlesen könnte. Also nicht nur mal so den Obertitel hätte, sondern auch wirklich die ganze Quelle lesen könnte. **I: Also im Original?** B: Genau, im Original.

**I19-10#I: Inwiefern sehen Sie denn Möglichkeiten, durch digital unterstütztes Arbeiten auch neue wissenschaftliche Erkenntnisse zu erlangen, also andere Fragestellungen bearbeiten zu können, mit anderen Methoden?** B: Das ist eine schwierige Frage. Vielleicht einfach dadurch, dass man mehr einsehen kann als man auf dem konventionellen Weg zur Verfügung hat. Und, dass man das vielleicht auch stärker nebeneinander darstellen kann und nicht alles so hintereinander abarbeiten muss. Dass sich vielleicht dadurch neue Erkenntnisse aus der Zusammenschau, aus der größeren Zusammenschau ergeben. Aber inwieweit das jetzt.... Das müsste ich ausprobieren, das ich kann nicht so im Theoretischen schwer sagen. **I: Ja, das wäre doch schon ein interessanter Punkt. Können Sie da vielleicht noch ein bisschen genauer**

**drauf eingehen – einfach an einem konkreten Beispiel, also zwei nebeneinander und dann die Gesamtschau? Das finde ich ganz interessant.** I: Naja, also wenn ich jetzt das Beispiel H nehme? H hat so gearbeitet, dass er sich immer hat inspirieren lassen von anderen Texten. Also er hat nie, sagen wir mal, aus sich selbst, oder nur ganz selten aus eigener Erfahrung geschöpft, sondern eher aus anderen Kunstwerken. Also er hatte immer Quellen. Also Quellen waren immer die Grundlage seines Schaffens und meistens nicht nur eine Quelle, sondern ganz viele Quellen. Also das müsste man erstmal ausprobieren, ich weiß nicht..., wenn man die alle nebeneinander hätte und sich die nebeneinander z. B. auf dem Bildschirm anschauen könnte, ob man dann noch mal zu neuen Erkenntnissen kommen könnte, was H jetzt daraus gemacht hat, wie jetzt diese Quellen im Zusammenspiel..., was die neues ergeben, ob man daraus einen Erkenntnisgewinn hätte, das müsste man eben ausprobieren, aber es ist durchaus möglich. Dass man so eine Art Muster erkennt und das ist vielleicht wirklich einfacher, als wenn man es nicht so zusammen auf einem Bild hat.

**I19-11#I: Interessant. Was sehen Sie denn jetzt aus dem ersten Test heraus und aus dem Vortrag von TextGrid als den größten Fortschritt, also das größte Potential? Und was sehen Sie noch als größtes Problem an?** B: Das ist auch schwierig. Ich glaube, der größte Fortschritt ist wirklich ganz platt gesagt die Vernetzungsmöglichkeit eben, die ist halt wirklich das A und O. Und, wenn man da wirklich eine Anwendung findet, die nicht schwer zu bedienen ist, sondern eben einfach, dann ist, glaub ich, ein sehr, sehr großes Ziel erreicht. Problem? Das ist jetzt auch schwierig. Gut klar, wenn man halt die Quellen... Es ist natürlich immer noch mal was anders, wenn man eine Quelle haptisch vor sich liegen hat und sich wirklich noch mal mit dem Original befasst. Da geht einem vielleicht auch noch mal was verloren, wenn man das nur digital hat. Aber auch das müsste man erstmal ausprobieren. Das ist immer schwer theoretisch zu sagen, weil man das, glaube ich, immer an der praktischen Erfahrung ausprobieren muss.

**I19-12#I: Sie haben jetzt das Wörterbuchnetz gar nicht getestet, das da noch dran ist? Das war nicht Teil des Workshops, aber es wurde ja auch genannt, es ist ja auch ein wichtiger Aspekt. Inwiefern können Sie das gebrauchen?** B: Jetzt muss ich noch mal überlegen? Das war ein historisches Wörterbuch oder mehrere Wörterbücher...? Ja, das wäre super. Das wäre top, wenn man das auch online verfügbar hätte, die verschiedenen Wörterbücher aus verschiedenen Zeiten, keine Frage, das wäre eine enorme Arbeitserleichterung. **I: Das wäre ja auch ein Aspekt des Datenzugriffs, was Sie eben als für Sie besonders wichtig genannt haben?** B: Also ich finde halt immer das Entscheidende, dass bei der Edition auch immer noch die

Information und der Sachgehalt im Vordergrund stehen sollte und, dass man vielleicht nicht dieses ganze „Drumrum“ verabsolutieren sollte. Das sollte wirklich ein Mittel zum Zweck sein und wenn man das schafft, so ein dezentres Mittel, dass man diese Vernetzungsmöglichkeit auf möglichst einfache Weise bietet, dann hat man, glaube ich, sehr, sehr viel gewonnen. **I: Ok, vielen Dank.**
