# Supplementary material
Source: publisher site journal article supplement (https://www.degruyterbrill.com/publication/isbn/9783110463927/downloadAsset/9783110463927_Interviews.zip)
Supplement: Supplementary file 12 [file I2.pdf › Interviews/I2.pdf]

**I2-1#Interviewer: Gut. Wie würden sie ihre EDV-philologische Erfahrung beschreiben und einstufen?** Befragte/r: Oh Gott, also meine Erfahrung geht zurück bis zum ersten PC. Ein IBM PC 1982, oder so. Und ich hab damals mit den ersten Rechnern, die noch gar keine Festplatte hatten und so angefangen und hab relativ schnell auch unterrichtet und habe schließlich vielerlei Sachen gemacht. Am Anfang programmiert, Schulungen gemacht, überall wo Bedarf war und habe schließlich auch eine philologische Arbeit gemacht mit Hilfe von Hypertext. Ich habe versucht, das Intertextualitätskonzept umzusetzen als Hypertext am Beispiel von H und erforsche kleinere Arbeiten mit D usw., also so die E. Und damals war das ja alles noch so bisschen durcheinander mit diesen Standards und die Hypertextgeschichten – es gab ja noch kein Web, ja – die hab ich mit Toolbook gemacht, was 1990 auf den Markt kam. Ich glaub 1989 war Hypercard auf dem Apple schon da. Und seitdem bin ich eigentlich immer an diesen Themen dran. Bis hin zur wissenschaftlichen Arbeit als Herausgeber einer Hybridedition, die selbstverständlich heutzutage mit XML und TEI gemacht wird. Und ich hab auch viele TEI-Workshops abgehalten und bin eigentlich in dieser ganzen Szene des wissenschaftlichen Publizierens eigentlich zuhause, kann man sagen.

**I2-2#I: Wie ist denn ihr Gesamteindruck des TextGrid-Lab nach diesem ersten Workshop? Das können sie ja wahrscheinlich gut beurteilen mit den Vorkenntnissen, die sie haben.** B: Na ich, für mich war es sehr vertraut, weil ich den Eclipse-Editor kenne und auch schon in der Lehre eingesetzt habe. Ich habe auch schon Seminare gemacht mit Studenten, die dort Editionen gemacht haben, von daher war das einfach. Ich finde, das TextGrid-Lab macht es noch etwas leichter einzusteigen, weil man eben sofort diesen Editor konfiguriert da hat. Das hat mir ganz gut gefallen und sah aus wie zuhause für mich. Was ich spannend finde, ist die Anbindung der Ressourcen, die jetzt natürlich durch die Herkunft des Projektes auf Wörterbücher, also, erstmal beschränkt ist und ich kann mir gut vorstellen, dass man dann eben andere Quellen da drinnen hat. Ja? Also, dass man viel arbeiten kann.

**I2-3#Aber ich glaube, da steckt auch ein bisschen noch die Krux in diesem Lab. Ja? I: Ja, können sie da genauer drauf eingehen? Also, sie meinen jetzt die Anbindung, die Schnittstelle an die – an andere Datenbestände?** B: Ich glaub das ist nicht das

Problem, sondern wenn die Datenmenge wächst bzw. diversifiziert wird, da wird man einen ordentlichen Browser brauchen, oder die Suchmaschine, die einem erstmal die – aufschlüsselt: Was kann ich, worauf kann ich denn zugreifen? **I: Ja.** B: Und dann brauch ich eine Darstellung dazu, um die dann in mein Lab reinzukonfigurieren. Also letztendlich suche ich mir dann meine Quellen zusammen, die ich brauche, klicke die an und habe die dann so wie jetzt die Wörterbücher, hab ich die da. Ja? Und das ist glaube ich noch tricky, also. **I: Ja, wenn sie sagen diversifizierte Datenbestände, große Datenmengen, die erstmal erschlossen werden müssen; dazu würde ja dann gehören, dass man zuerst mal erkennen muss, auf was man alles zugreifen kann, das heißt das müsste mal zunächst abgebildet werden dem, dem Nutzer.** B: Genau. **I: Ja.** B: Also aus meiner Sicht fast ontologisch, ne? Müsste man zuerst mal eigentlich einen Baum haben. Was für Typen habe ich? Ja? Und dann inhaltlich natürlich, ne? Und diversifiziert, denke ich halt, wir wollen ja über TextGrid zum Beispiel Editionen haben, an denen wir weiterstricken wollen. Oder ich möchte zwei verschiedene H-Ausgaben haben und dann sehen: So jetzt, was mach ich daraus? Das ist eine Gattung. Ich will vielleicht Transkriptionen haben. Ich will vielleicht Datenbanken haben, die mir Informationen liefern. Ich möchte Repositorien haben für, für die Geschichte der elektronischen Kodierungen, oder ich möchte verschiedene Metadatenstandards haben. Also es gibt einfach verschiedene Klassen von Quellen, die ich da brauche und da muss ich mich erstmal durchklicken und muss mir das hinkonfigurieren können. Das meine ich.

**I2-4#I: Ok, verstehe. Ist ihnen denn etwas besonders negativ aufgefallen. Sie haben jetzt ja schon verdeutlicht, was sie schätzen. Ist ihnen jetzt was aufgefallen, was ihnen jetzt noch nicht gefällt?** B: Also, kann ich eigentlich so nicht sagen. Diese kleinen Bucs, das sind Kinderkrankheiten, ist kein Problem. Das erste, was mir als Wissenschaftler aufstößt ist: Where is my data? Ja? Das fließt in dieses Repository und ich habe auf meinem lokalen Workspace, habe ich zwar eine komische Nummer, die sagt: Da ist was passiert. Aber ich weiß nicht wirklich, wo meine Daten sind. Ja? Und das find ich ein bisschen strange. Also das, das macht einen so ein bisschen unruhig, ne? Ich hab das zu Hause geöffnet, habe das nachbereitet – brav – und habe die auch sofort wieder gefunden – ist klar. Sie sind dann wieder da, aber diese Intransparenz, wie das eigentlich dann abläuft. Ja? Die stört mich. Könnte mir

vorstellen, dass andere das nicht stört, aber mich stört das. Ja? Also ich würde gern direkter, also fast wie ein Browser auch, darauf zugreifen können, oder sehen können: Wo liegt das? In welchem Format liegt das da? Ist das so wie ich es wollte? Und so. Also das würde mir fehlen noch.

**I2-5#I: Stört sie dann in dem Zusammenhang auch was an der gesamten Organisation und Navigation in dem Lab?** B: Eigentlich nicht. Also, wie gesagt. Ich bin diesen Eclipse-Editor gewohnt. Ich kenne diese Projektgruppen – mehr Navigation ist ja erstmal nicht. Also von daher, das ist ok.

**I2-6#I: Es hängt also eher daran, transparent zu machen: Wo sind die Daten?** B: Genau, also diese Navigationsleiste gaukelt einem ja vor: Da sind die Daten, aber die liegen ja gar nicht da, sondern die liegen irgendwo auf einem TextGrid-Knoten, ja? Und man kriegt über das Lab nicht mit: Wie oft ist das repliziert? Wo ist das synchronisiert? Also eher in dieser Art. **I: Es hängt ja dann auch damit zusammen: Wie sind die Rechercheergebnisse dargestellt? Das heißt, wenn sie etwas suchen, dann ergibt sich ja dasselbe Problem in der Darstellung, oder sehen sie das anders?** B: Ich denke, dass, wenn man Quellen oder dieses Repositorium angreift, wird man ja so eine Browsertechnik haben müssen. Und so stell ich mir das auch für meine eigenen Daten vor. Dass ich ungefähr die Struktur sehe, in der das auch abgelegt ist. Ich würde es sehen wollen.

**I2-7#I: Gut. Gab es Funktionen im Lab, die neu für sie sind?** B: Also neu war mir nur dieser, diese Metadaten, die speziell jetzt da drauf sind. Und die müsste man auch transparenter machen. Ja? Also, es ist nicht ganz klar, also – ja, was machen die eigentlich, ne? Also die sind, so wie ich es verstanden habe, zum Ablegen der Projekte auf den Knoten, ja? Aber das wird mir nicht ganz deutlich. Also, da würde ich zum Beispiel an der Begrifflichkeit etwas ändern und sagen: TextGrid-Metadaten, oder so was, weil unsereins natürlich viele Metadatenstandards im Kopf hat, von Dublin Core über was weiß ich, ja? Bis hin zu bibliothekarischen Sachen, wie US-Mark und was weiß ich. Ja? Und da ist es ein bisschen, ein bisschen komisch und das war mir eigentlich neu. **I: Gut, so, Funktionen, die ihnen noch fehlen, da haben sie schon ein paar Dinge genannt. Gibt es noch ganz konkrete Funktionen, die ihnen jetzt einfallen würden? Was fehlt?** B: Nein, aber eins noch dem, zu der vorigen Frage, was mich vielleicht am meisten stört ist, dass diese TextGrid-Metadaten nicht in

meinem Dokument auftauchen. Das kann man machen. Ja? Sie haben ja gesagt, man kann das in TEI-Headern verwenden. Das hab ich auch probiert und hab auch gesehen, dass das geht. Aber trotzdem hätte ich gern, also so ist es ja zumindest meine Philosophie, dass alle Daten im XML-Text stecken. Und deshalb müsste man eigentlich einen Header-Platz haben, wo die TextGrid-Metadaten drin stehen. Also das fehlt mir, ne. **I: Gut.** B: Hab ich zwei Fragen beantwortet? **I: Zwei Fliegen mit einer Klappe, ja genau. Wunderbar.**

**I2-8#**Noch ein Aspekt im TextGrid-Lab ist die, oder soll zumindest die Individualisierbarkeit sein. Also, dass Anpassen der Arbeitsoberfläche an die individuellen Bedürfnisse, Gewohnheiten, Vorlieben. Haben sie das genutzt bzw. finden sie es in der Form, wie es bis jetzt existiert, nützlich oder nicht? B: Ja, ich habe es schon genutzt, also so wie es ist, aber ich kannte es auch schon. Aber das ist mir ziemlich unwichtig. Also in der Zeit, in der ich mit solchen Programmen – in der habe ich schon so viel durchgemacht, ja, dass es mir eigentlich, also mir persönlich ist es wurscht, ja? Also je mehr man konfigurieren kann und muss, desto verwirrender wird es. Ja? **I: Ja, das ist ja die Kehrseite der Medaille. Es gibt ja auch im Lab verschiedene Wege, die zum selben Ziel führen können, zumindest wird es später auch, wird es später so sein. Kann eben auch durcheinander bringen.** B: Aber heutzutage muss man sich spätestens alle Jahre mit seinem normalen Officeprogramm wieder durch eine neue Navigation durchklicken. Schimpft man zwei, drei Tage und dann geht es wieder. Also das ist, hat keine hohe Priorität für mich.

**I2-9#I:** Gut, das wäre es jetzt auch zu dem Lab konkret als Forschungsumgebung. Jetzt zum Begriff eHumanities und digitale Infrastruktur und TextGrid im Allgemeinen auch als Idee. Es soll ja eine digitale Infrastruktur in den Geisteswissenschaften bieten. Welche Bedeutung messen sie eHumanities, diesem Begriff, der jetzt in aller Munde ist, bei? B: Große! **I: Ja, jedenfalls, naja, gut, sagen wir mal in dem Kontext jetzt.** B: Ah doch, ich glaube, dem muss man jetzt schon große Bedeutung zumessen. Also das ist eine Zukunft, die an uns auf gar keinen Fall vorbeigehen kann. Sie kommt eigentlich eher mit mehr Macht auf uns zu, als wir jetzt glauben wollen. Wir sind ja viel gewohnt, also die, wenn man sich vorstellt, seit 1990 gibt es das Web erst, ja? Und heute? Meine kleine Tochter surft im Web und findet Sachen raus – schneller als ich, ja? Also das ist eher schon eine

Revolution, aber es wird jetzt nochmal einen Schub geben. Also einerseits durch – ja, klingt blöd – aber Kostenersparnis auf der Seite der Verlage und der, auch der Autoren, ja? Auch wenn auf der anderen Seite noch viel mehr Geld reingepumpt wird, ne, um die eHumanities aufzubauen, wird es trotzdem von der kommerziellen Seite her auch einen Schub geben, die Sachen anzubieten. Das ist das Eine.

I2-10#Das Andere ist, dass man sich mittlerweile, glaube ich, schon sehr an die Vorteile der elektronischen Möglichkeiten gewöhnt hat und die auch weiter nutzt. Man wird kreativer, ja, das zu machen. Und auch solche Konzeptionen wie kollaboratives Arbeiten nehmen einfach zu, ja? Also und dann sagt man: Warum muss ich es nochmal abtippen, wenn es doch da schon eine Edition gab? Also ich denke, das ist gerade sehr stark im kommen und vor allem diese Kreativität im wissenschaftlichen Bereich, zu sagen, ich kann plötzlich auch Wörterbücher kollationieren und nutzen und so was, ja? Das wird wirklich ein neuer Zweig, auf jeden Fall. Und es gibt also vor allem in Amerika, gibt es wirklich revolutionäre softwaregestützte Interpretationsansätze, die einfach auch die Literaturwissenschaft oder Literaturtheorie beflügeln. Ja? Also deshalb ist das groß. Ja?

I2-11#Also, was dagegen steht ist nach wie vor unser, also vor allem das europäisch geprägte wissenschaftliche Prestige, nach wie vor, und auch die Angst, vor diesem, ja, vor diesem Ausufernden, ne? Also, warum soll ich meinen Text hergeben? Wer macht da was damit? Ja? Also das steht dem eigentlich entgegen. Aber diese Stimmen, die werden auch wieder abdämpfen, ja? Weil man irgendwann mal merkt, es wird weiterhin Spezialgebiete geben, in denen sich nur wenige auskennen, oder im besten Fall, man nur selbst und man kann dann Vorteile abschöpfen, ohne dass eigentlich zuviel wegfließt, unkontrolliert, ja? **I: Sie denken also, dass diese Hürden, die es im Moment noch gibt bzw. Angst davor sein Wissen, oder sein Werk zugänglich zu machen oder zu teilen, dass die mit der Zeit abnehmen werden?** B: Ich meine schon. Das denke ich schon. Na ja, vor allem, weil es schon so ist. Ich meine, wo ist das Interesse daran, an einem Gegenstand, also weiterzumachen, ohne die wissenschaftlichen Gepflogenheiten einfach weiter zu pflegen, ja? Also zum Beispiel die Tags, die der Transskriptor hinein gemacht hat, auch drin zu lassen. Also ich denke das wird schon.

**I2-12#I: Sie haben schon angesprochen: Kollaboration. Ist ja ein ganz wichtiger Ansatz, auch das TextGrid-Lab. Welche Potentiale sehen sie da? Können sie da noch ein bisschen genauer drauf eingehen, was da Neues möglich wäre?** B: Naja, also – Vieles! Also, ein ganz konkretes Projekt beginne ich jetzt mit einem Kollegen, der auch in M saß, ja, der aber jetzt eine andere Stelle hat und woanders sitzt, ja? Wir wollen aber trotzdem weiter zusammenarbeiten und schon sind wir räumlich getrennt, haben aber den gleichen Gegenstand. Also dann wird es schon bedeutend, dass wir eben da eine Möglichkeit brauchen, um unsere Ergebnisse zu „sharen“, ja? Das andere ist, dass, also für meinen Bereich einfach Quellen verteilt liegen und auch dann verteilt aufgearbeitet werden müssen. Ich denke zum Beispiel an Nachlässe wie K. Da gibt es einen Teil in M, da gibt es einen sehr bedeutenden Teil in L. Und da gibt es verstreute kleine andere Teile, ja? Und es gibt eine Arbeitsstelle in W, ja, die arbeitet, aber keine Bestände hat. Und man wird einfach die Dinge, die man vor Ort machen muss, weiterhin vor Ort machen. Muss aber nicht mehr dahin reisen, sondern kann das die Leute dort machen lassen usw., ne? Also so ist durch die verteilte Quellenlage und eben durch Ortsunabhängigkeit, ist das schon wichtig. Das ist, das ist ein wichtiger Aspekt glaube ich, der auf jeden Fall kommen wird. Ein Zweiter bei der Zusammenarbeit wird eben sein, dass man Schichten, verteilt bearbeitet. Dass man einfach sagt: mein Interesse wäre es, nur diesen Text verfügbar zu machen, ja. Ich transkribiere ihn sauber und, ja, lege ihn herein. Ein Anderer kommt dann drauf und sagt: Mensch, das braucht noch ein Register. Dann macht der das Register dazu. Also diese Art von Schichten, das wird auch kommen, glaube ich. **I: Ja, also zuerst die Volltexterschließung, dann aber auch die Bildung zusätzlicher Informationsebenen praktisch darüber, also Metainformationen und Ähnlichem.**

**I2-13#Das geht ja auch in Richtung Semantic-Web, Ontologien, oder zumindest Vernetzung von Inhalten bzw. Erschließung von Inhalten, die dann vernetzt verwendet werden können.** B: Das, das wäre glaube ich nochmal ein anderer Zweig, der aber auch sinnvoll ist. Ja, klar, ne? Also wir hätten einfach räumlich getrennte Arbeiten. Wir hätten Schichtenarbeiten und wir hätten Zusammenbinden von Inhalten in Ontologiestrukturen, in Semantic Web-Strukturen, die einfach die verschiedenen Inhalte strukturieren, ne? Beim einen Ansatz strukturiert man einen Content sozusagen und bei dem Semantic Web strukturiert man noch die einzelnen Contents, ne? **I: Ja,**

**die Verbindung zwischen den einzel...** B: Genau, das wird teilweise eben schon gemacht auf einer sehr abstrakten, fast bibliothekarischen Ebene, durch die virtuellen Fachbibliotheken. Da fängt das eigentlich schon an. Da kann man auch sehen, dass die eHumanities einfach kommen, ja? Weil durch die virtuellen Fachbibliotheken sieht man schon, welchen Wert das hat, wenn man zumindest die Metadaten schon mal auf diese Weise strukturiert angeboten bekommen hat. Und der nächste Schritt wird sein: Ich möchte die Inhalte jetzt aber gleich dazu haben. Und das wäre toll. **I: Ja, zusammenfassend würden sie ja dann letztendlich sagen, dass es sich um eine Vernetzung von Inhalten, aber auch von Arbeitsprozessen handelt, oder dass die zumindest möglich sind.**

I2-14#B: Und was wir vergessen haben, ist die weitere Zusammenarbeit beim Bereitstellen von Tools. Das würde ich nicht unterschätzen, ne? Das ist ja auch ein Ansatz von TextGrid, dass man modular die Teile, die man braucht, einbauen kann. Ja? Und das wird es auch beflügeln, dass man diese Instrumente auch benutzt, ja? Wenn man einfach eine Community hat, wo es erstmal zwei, drei Leute gibt, die sagen: Ja, ich brauche aber jetzt diesen Browser – den ich vorher gesagt hab – ich will sehen wo meine Daten sind. Dann programmiert sie jemand ein und stellt das allen zur Verfügung. Das ist auch eine Art von Zusammenarbeit auf dieser Softwareebene. **I: Das zur Verfügung stellen von Schnittstellen von Seiten der Community. Ja. Ja, gut.**

**I2-15#Damit haben sie schon wieder die nächste Frage beantwortet. Sehen sie einen entscheidenden oder mehrere entscheidende Fortschritte gegenüber anderen EDV-philologischen Systemen, die sie kennengelernt haben? Sie haben ja gesagt, sie haben, sie kennen da sehr viele verschiedene. Was ist für sie so der markanteste Fortschritt?** B: Na ja, auf jeden Fall die Plattformunabhängigkeit durch Verwendung dieser Standards wie XML, TEI, die überhaupt die Offenheit, ja? Das Communitybuilding letztendlich. Ja? Und zwar nicht durch – Wie soll man sagen? – durch, durch ein reines Angebot an Software, und man sagt: Das ist ein gutes Tool, jetzt könnt ihr das benutzen. Sondern dadurch, dass man sagt: Ihr werdet in jeder Beziehung Teil dieser Community. Ihr könnt Texte teilen. Ihr könnt aber auch Software teilen, mitbauen. Ihr könnt das mitbestimmen. Das ist schon was Neues. Was ich natürlich von der TEI sehr gut kenne, die aber keine Softwarekomponente ist, ne?

Hier würde man die Tools und die Inhalte praktisch in die Community einbringen. Und das ist schon neu und lobenswert.

**I2-16#I: Und das größte Manko, das sie an dem Ganzen im Moment noch sehen, oder überhaupt sehen? Wo sie skeptisch sind? Gibt es da ein Schlagwort?** B: Ja, das man noch nicht weiß wie es wirklich weitergeht. Ja? Also jegliches Tool ist nur so gut wie die Benutzer, die daran partizipieren. Also man braucht wirklich jetzt Projekte, die das tatsächlich machen und es muss sichergestellt werden, dass diese TextGrid-Knoten nicht nur bestehen bleiben, sondern auch wachsen. Ja? Das ist das größte Manko. Diese Ungewissheit, ob diese gute Idee wirklich weiter trägt. Ja? Also bei der TEI ging das ja nur über diesen Konsortium-Gedanken. Man wird sozusagen Mitglied dieser Gemeinde und trägt so dazu bei, dass es auch finanziell möglich ist, das zu machen. Ich finde es sehr gut, dass es bei TextGrid nicht so ist, zumindest jetzt durch die Förderung vom BMBF, nicht so ist, ne? Aber irgendwie muss man sicherstellen, dass es einfach nicht wieder so eine Sackgasse wird, wie viele, viele gute Ansätze, die es in der Vergangenheit auch schon gab. **I: Das klingt ja fast so als hätten sie vielleicht eine Idee?** B: Ja, eigentlich habe ich keine Idee, außer dass ich mein Institut davon überzeugen will, dass wir einen Knoten brauchen. Ja? Also selbst mittun ist meine Idee eigentlich. Und überzeugen. Aber eine Finanzierungsidee hab ich schlichtweg nicht. In den heutigen Zeiten sowieso nicht. Aber das Wort Community ernst nehmen und wirklich teil davon werden, um es mit aufzubauen. Das wäre eigentlich die Idee. Ja? Werde ich versuchen.
