# Supplementary material
Source: publisher site journal article supplement (https://www.degruyterbrill.com/publication/isbn/9783110463927/downloadAsset/9783110463927_Interviews.zip)
Supplement: Supplementary file 13 [file I20.pdf › Interviews/I20.pdf]

**I20-1#Interviewer: Inwiefern haben Sie mit diesem Thema zu tun? Was machen Sie in diesem Bereich? Wie würden Sie ihre Erfahrung einschätzen?** Befragte/r: Also, ich habe, was

das elektronische Medium angeht, bisher nur mit dem Computer gearbeitet, habe auch eine kleine Internetseite gemacht für die F-Gesellschaft, aber wirklich nur ganz simpel, im Grunde genommen habe ich, was TEI oder HTML, XML angeht, überhaupt keine Kenntnisse, habe mich aber theoretisch-methodisch damit beschäftigt und sehe, dass wir als Literaturwissenschaftler Möglichkeiten haben, Handschriften, Texte überlieferungsadäquat darzustellen und dem Benutzer viel mehr Möglichkeiten bieten können, z. B. genetische Forschungsansätze zu betreiben, als wir das in der traditionelle Buchform machen können.

**I20-2#I: Ja, welche Funktionen stellen Sie sich da vor?** B: Also, zum einen eine ganz genaue Transkription der Texte aus den Handschriften und die Digitalisate daneben stellen, dann habe ich Möglichkeiten, die einzelnen Textschichten elektronisch herauszufiltern, miteinander zu verknüpfen und somit vielleicht auch die Genese zu rekonstruieren, indem ich weiß, was ist die Grundschrift, was war Überarbeitung, was war eine Hinzufügung, wann kam vielleicht welche Hinzufügung dazu oder welche Streichung. Und kann das aber auch so transparent machen, dass ich zum einen die Schichten rausfiltere oder als Gesamtkonvolut dem Benutzer anbiete und dem Benutzer die Möglichkeit geben kann, das auch individuell nochmal zu rekonstruieren und auch zu überprüfen und zu sagen, das würde ich vielleicht als Benutzer anders sehen. Im Buch haben Sie ja nur die platte Form. Also sie können das Faksimile haben und haben dann genau die Transkription, aber da setzt ja im Grunde genommen erst der Benutzer an und muss selber schauen, ja wie verhalten sich Streichungen zu nicht gestrichenen Texten.

**I20-3#I: Ja, und Sie haben vorher aber auch editorisch gearbeitet, also bisher?** B: Ja, also ganz traditionell. Ich habe sehr viele Briefeditionen gemacht. Ich bin an der F-Werkausgabe mittlerweile Hauptherausgeberin, habe da einige Bände gemacht und habe also den Computer im Grunde genommen nur als Hilfsmittel benutzt, weil Ziel war eben als Studienausgabe oder als historisch-kritische Ausgabe, also das Medium Buch mit einem ganz ausführlichen Stellenkommentar. Und an die Textkonstitution selbst war im Grunde genommen die Anforderung nicht so groß, weil wir auch oft die Drucke zugrunde gelegt haben und bei Briefen eben auch wenig Streichungen, Überarbeitungen der Autoren, der Briefschreiber sind, sodass wir da auch im Buch Möglichkeiten haben auch einen Brief mit seinen kleineren Varianten darzustellen.

**I20-4#I: Ja, aber Sie haben gesagt, Sie sehen schon die möglichen Funktionen durch digitale Arbeit. Mit welchen Erwartungen sind Sie dann zu dem TextGrid-Workshop gegangen? B:**

Ich habe über TextGrid nur wenig gehört. Also, ich habe von einigen Kollegen, z. B. J, der hat mir etwas darüber erzählt, auch G, davon gehört und wollte mich erstmal informieren überhaupt über die Benutzungsbedingungen, auch über die Leute und die Zusammensetzung und mir hat von Anfang an gefallen, die Idee der Vernetzung, die dahintersteckt. Also jetzt weniger die ganzen Einzelheiten, sondern einfach, was ich als Wissenschaftlerin für einen Nutzen habe, wenn ich mich dem anschließe und es ist sehr schwer, zum einen an die richtigen Leute zu kommen. Also die Interdisziplinarität ist also für mich ganz wichtig, das ist auch im editorischen Bereich enorm wichtig, weil man doch auch ähnliche Probleme hat, sei es zusammen auch mit Kunsthistorikern. Wenn ich – ich habe ein Projekt vor: Notizbuchedition, da sind viele Zeichnungen und Texte. Da stell ich mir auch vor, dass ich dort auch mit Kunsthistorikern ähnliche Probleme habe, die das auch bei Künstlernetzwerken eventuell haben. Das andere sind die Tools, die zur Verfügung gestellt werden und also, dass es auch kostenlose Nutzung ist für Leute, die sich an die Projekte anschließen möchten.

I20-5#Und vom Workshop selbst hatte ich eigentlich gar keine große Erwartung. Ich wollte einfach mal schauen und war insgesamt eigentlich auch zufrieden, wie das gelaufen ist, weil es zum Glück auch nicht zu viele Informationen auf einmal waren. Also, ich glaube, man muss sich damit so nach und nach beschäftigen. Das bringt nichts, wenn Sie da mit allen Sachen ankommen.

**I20-6#I: Ja, Sie haben jetzt Stichwort „Vernetzung“ erwähnt. Welche Aspekte von Vernetzung meinen Sie? Haben Sie da jetzt in erster Linie die zu anderen Wissenschaftlern in dem Bereich gemeint, oder...? B:** Das Eine, und das Andere ist auch die... , wenn ich jetzt

sehe z. B., dass Sie jetzt Wörterbücher oder elektronische Textausgaben seit Neuestem auch mit anbieten, dann habe ich natürlich Möglichkeiten, für eine Kommentierung dort schon eine Vernetzung vor Ort vorzunehmen. **I: Also eine Vernetzung von Daten.** B: Von Daten, genau. Also das sind verschiedene Aspekte. Mit Wissenschaftlern, aber auch mit dem technischen oder mit dem Daten-Know-How. Und das finde ich wirklich einen ganz großen Vorteil.

**I20-7#I: Also der Zugriff auf eine Infrastruktur ist Ihnen wichtig. Ein weiterer Aspekt der Vernetzung ist ja auch, dass man über das Medium zusammenarbeiten kann in einem Projekt. Welche Bedeutung hat das für Sie? Wie bewerten Sie das, wie sehen Sie das? B:** Ich könnte mir das vorstellen, dass das wichtig ist. Also wir haben das ja auf anderen Gebieten auch

schon immer, wenn verschiedene an einer Universität... Oder man hat zu anderen Universitäten Kontakt und man tauscht sich mit den Forschern aus. Könnte ich mir vorstellen, dass man, indem man diese Plattform, die gemeinsame Arbeitsplattform hat, dass der Austausch effizienter und effektiver und auch einfacher gehen kann und man kann vielleicht auch in die anderen Projekte reinschauen, man kann ja auch lesen, also dass man sich dann darüber informiert, dass es vielleicht auch ähnliche editorische Probleme gibt, die man vielleicht dann gemeinsam lösen kann. Ich kann das im Moment noch nicht so abschätzen, aber ich denke schon, dass da ein Nutzen sein wird. Das ist ja dann oft immer am konkreten Problemfall...wird sich das erst rausstellen, aber ich könnte mir das vorstellen, weil das eben auch ohne das elektronische Medium schon möglich ist und mit den elektronischen Möglichkeiten... Wenn man vielleicht auch verschiedene Transkriptionsformen sieht oder man sieht verschiedene Kommentarformen, dass sich dann noch mehr die Zusammenarbeit ergibt oder zumindest vielleicht die Orientierung am andern und der Austausch vor allen Dingen. **I: Ja, wie wird das denn in dem Bereich bisher gehandhabt, in dem Sie arbeiten? Sie haben doch wahrscheinlich auch Kollegen in einer Art Projektstruktur, mit denen Sie zusammenarbeiten?** B: Also das geht auch viel über E-Mail, Internet. Wir haben... Es gibt bei anderen Editionen auch ja ähnliche Plattformen, die aber längst nicht so eine Infrastruktur bereitstellen wie Sie. Aber man hat dann eben auch schon eine Möglichkeit, dass man nicht in einem Raum, an einem Ort sitzen muss, sondern auch im Ausland, auf der Welt eben an verschiedenen Orten sein kann und sich über diese Plattform austauschen kann. Aber diese Vernetzung und diese Infrastruktur, die eben TextGrid bereitstellt, das hab ich bisher so noch nicht gesehen. Ansonsten ist ja immer der konventionelle Weg jetzt per E-Mail oder per Telefon oder persönlich oder man hat ein Seminar oder Workshop und trifft sich dann. Aber das ist ja dann immer ortsgebunden gewesen. **I: Ja, was sind denn das für Plattformen, die es da bisher gibt? Wie muss man sich das vorstellen?** B: Also, das ist...ich weiß jetzt nicht genau, wie das heißt. Aber wir haben aber z.B. bei der B Akademie der Wissenschaften, das wird dann vom Rechenzentrum aus erstellt, eine Arbeitsfläche, wo Sie eben auch Digitalisate einstellen kann, die man transkribiert, und wo man vielleicht auch Register anlegen kann und wo man dann auch vielleicht für einen Kommentar schon bestimmte Dinge vorbereiten kann. Denn zu dieser Plattform haben dann alle Mitarbeiter, was definiert ist, Zugang, die dann eben auch einen Pin und so weiter haben, einen Benutzernamen und die dann eben sich über diese Plattform austauschen können. Also, die können dann auch eventuell korrigieren, wenn Lesefehler gemacht worden sind, diese Dinge. Das andere war, das war mit

den B Projekten, was einmal den N-Nachlass angeht und das andere war der B-Nachlass mit diesem freien Editor, da hat man auch die Möglichkeit, eben solche Plattformen zu nutzen. Aber das dient wirklich dann nur diesem einen Projekt. Also sprich... auch Transkription von Briefen und dass man sich eben für dieses eine Projekt miteinschalten kann. Also das ist nicht so groß angelegt mit verschiedenen Wissenschaftlern, verschiedenen Projekten, wie das eben so TextGrid, glaube ich, anstrebt.

**I20-8#I: Ja, welche Funktionen waren denn dann in dem TextGridLab völlig neu für Sie,**

**wenn Sie schon solche Plattformen kennengelernt hatten?** B: Sie meinen schon die Einzelanwendungen natürlich? Also, ich hab mich immer ein bisschen theoretisch damit beschäftigt und habe das auch genutzt. Das Problem ist für mich jetzt auch, sich wirklich in die TEI richtig einzuarbeiten. Das hab ich auch... da habe ich gedacht, dass man beim Workshop vielleicht ein ganz kleines bisschen davon auch erfährt, auch vielleicht, wie man Daten vielleicht einstellen kann, aufladen kann. Aber das sind wahrscheinlich die Schritte, die man nach und nach sich peu à peu erarbeiten muss. Aber das ist auch eine Sache, wo ich wirklich auch absolut großen Respekt vor habe und wo der Nutzen aber nachher so groß einem vorkommt, dass man das dann auf sich nimmt. Denn wenn ich eine Möglichkeit hätte, das in Word zu schreiben und man das nur einfach konvertieren müsste, würde ich natürlich diese Möglichkeit vorziehen. **I:**

**Das wäre also eine Erleichterung, also ein Konvertierungssystem?** B: Ja, ja absolut. Ich weiß..., man hat mir gesagt, es gibt so was schon, aber die sind nicht zuverlässig und dann muss man wieder von vorne anfangen und dann ist es natürlich schon...Ich meine dieses Schema zum Beispiel müsste man auch erstellen. Also Sie müssen eine genaue Auszeichnung haben, wie die...ja, dass Sie einmal diese Orthogra..., nein die Topographie herstellen können, dann aber auch die Materialität der Schreibgeräte, dann eventuell wo welcher Text genau angesiedelt ist. Also diese Definition vorab müssen Sie im Schema für TEI machen oder auch in einem Word, in einer Formatvorlage, Formatierungsvorlage. Aber es wäre für diejenigen, ich denke, ich bin da nicht die Einzige, weitaus einfacher, man könnte in einem so einfachen System wie Word arbeiten. **I: Oder etwas Ähnlichem, was einem erspart, die Sprache praktisch zu lernen.** B:

Ja genau, dass man mit Entwicklern und Informatikern zusammenarbeitet, das ist ganz wichtig, denk ich, denn es können ja auch immer ja unvorhergesehene Dinge auftauchen bzw. braucht man auch Hilfen, wenn man ein individuelles Schema ja anlegen muss und dafür eben was entwickelt werden muss. Das finde ich auch sehr sinnvoll, dass man diesen Ballast z. B. abgeben kann und sagen kann, ich möchte genau meinetwegen die Streichungen gestrichelt haben oder eben

waagrecht oder senkrecht und das kann mir dann eben auch einer entsprechend umsetzen. Und ich muss mich mit diesen technischen Details nicht beschäftigen.

**I20-9#I: Was waren denn dann Punkte, an denen Sie sagen würden, das ist ein Problem oder da fehlt was in TextGrid? Es wäre ja jetzt ein Punkt, dass Sie sagen würden, eine Barriere ist, dass man XML können muss letztlich, wenn man editorisch arbeiten will. Aber gibt es ansonsten Funktionalitäten, die Sie vermisst haben, oder etwas, was Sie als problematisch ansehen von dem, was Sie jetzt kennengelernt haben?** B: Also ich denke, dass es – so ist es auch ausgelegt – dass es ausbaufähig ist, also ich habe jetzt gerade so was gesehen, Wörterbücher und so was, das interessiert mich sehr, weil ich auch Kommentierungen anschau. Ich brauche historische Werke, aus denen ich zitiert habe und immer alles eigentlich transkribiert oder eigentlich abgeschrieben habe, was ich dann..., wo ich verlinken könnte oder eben ausschneiden einfügen oder kopieren einfügen machen könnte. Da wird ja auch noch viel..., da ist einiges in Plan, was ich gesehen habe, dass die Trierer das wohl auch demnächst noch viel mehr über historische Wörterbücher einbringen wollen, die sich ja auf die Mediävistik konzentriert haben, für die Germanisten das Grimm'sche Wörterbuch ist drin, aber die wollen noch viel mehr wohl bringen. Also das finde ich sehr sinnvoll. Was auch ein Zugewinn war, war mit der Bibliothek Zeno, das ist für uns schon sehr hilfreich, wobei wir natürlich prüfen müssen, ob diese digitalisierten Editionen, historischen Editionen für uns dann brauchbar sind, weil wir dann doch oft von einem bestimmten Jahr oder eine bestimmte Auflage brauchen. Wenn jetzt z. B. einer im Brief genau Bezug nimmt, auf eine bestimmte Neuauflage, die eben 1853 erschienen ist und aber elektronisch liegt vielleicht die von 1878 vor, dann kann ich darauf nicht zurückgreifen. Aber das sind dann, denke ich, kleinere Probleme, dann muss man dann eben doch auf einen konventionellen Weg zurückgreifen.

**I20-10#I: Aber generell der Aspekt Erweiterbarkeit ist für Sie wichtig. Inwiefern denn noch? Also das Beispiel Wörterbücher... ja, dass man da weiter ausbauen kann, indem Inhalte eingestellt werden, erweitert werden. Das ist ja klar. Gibt es noch einen weiteren Aspekt, wo Sie Erweiterbarkeit damit verbinden?** B: Also, wir haben...der Schwerpunkt liegt ja immer auf der Textdarstellung, also Transkription und ob ich eine lineare Transkription machen kann oder eine genaue diplomatische, also mich interessiert darüber hinaus auch die Art des Kommentierens, auch Register anlegen und diese Geschichten. Da habe ich aber bisher nicht mich damit beschäftigt, wie TextGrid da Möglichkeiten bietet, also ich habe auch jetzt erfahren, dass es wohl auch Möglichkeiten gibt, auch der Lemmatisierungen und so weiter, was auch für

die Kommentierungsarbeit ganz wichtig ist. Aber ich denke, dass sind auch zum Beispiel Dinge, die in den Workshops vielleicht, worauf man da auch nochmal mehr eingehen könnte, weil das viele Leute auch betrifft, die jetzt edieren. Weil, es ist so, dass in der Editionswissenschaft eben der Schwerpunkt auf der Textdarstellung, auf der Textkritik liegt. Und das war auch im Moment das Anliegen. Und wenn ich die Projekte sehe, die laufen, wie z.B. F-Edition, die konzentrieren sich auch auf die Textdarstellung und auf den textkritischen Apparat. Und das andere wird...also das geht auch nicht, weil das natürlich von der Masse her nicht zu leisten ist. Aber diese Probleme, die dann erst sich erübrigen, also Einzelstellenkommentar oder Überblickskommentare und diese Dinge, die spielen da keine Rolle. Und dass man da vielleicht noch Möglichkeiten entwickeln kann. Aber... **I: Ja, also zusätzliche Werkzeuge, um am Text zu arbeiten und da Zusatz-..., also Mehrwerte zu erzeugen.**

**I20-11#Wie fanden Sie denn bisher die Benutzerfreundlichkeit dieses TextGridLab? Bei dem Testen, hat es da irgendwo gehakt, oder...?** B: Also, es ist so: Auf den ersten Blick, es sind sehr viele Felder, die man bedienen kann. Aber, wenn man sich da mal ein bisschen vertraut gemacht hat bzw. wenn man auch das Arbeiten gewohnt ist mit... im Internet oder mit Word und so weiter, dann hat man auch schon eine gewisse Vorbildung und kann sich dann auch dann vorwärts klicken. Und ich fand das..., wir haben ja das Textbild-Editor gemacht und das fand ich sehr, sehr gut. Also mir war da nichts Negatives aufgefallen, was jetzt unfreundlich gewesen wäre. Sagen wir es mal so.

**I20-12#I: Erweiterbarkeit haben Sie genannt. Kann ja auch bedeuten, dass man das System an die eigene Arbeitsweise anpasst. Inwiefern ist das für Sie wichtig? Welche Bedeutung hat das für Sie? Was könnten Sie sich da vorstellen?** B: Das ist jetzt interessant, weil wir da am Dienstag auch in Göttingen schon drüber gesprochen haben mit Herrn L und es ist so, dass ich ja eine Notizbuchedition plane und denke mir, dass die Möglichkeiten, die ich da entwickeln werde, oder die auch schon da sind, dass man das für weitere Notizbucheditionen von anderen Autoren auch nutzen kann und insofern denke ich, dass man zum Beispiel bei der Textauszeichnung da vielleicht auch auf Dinge stößt, die sonst noch nicht im Schema drin sind und dass man das dann aber dann in ein weiteres Schema doch einbauen kann. Also, wenn z.B. dann doch ausgerissene Seiten sind, was man dann eben festhalten möchte, oder aufgeklebte Seiten oder irgendwie so was. Das meiste ist wohl im Schema drin, aber ich denke, dass es da schon auch Möglichkeiten gibt, durch die eigene Projektarbeit bestehende Formen noch zu differenzieren und zu modifizieren. Aber ich denke, so ist TextGrid auch angelegt, was mir auch sehr entgegenkommt.

Also, weil ich denke, man weiß es auch oft am Anfang des Projektes nicht, gerade wenn man mit verschiedenen Handschriften zu tun hat, ob man wirklich alle Funktionen, ja alle Nutzungen, Möglichkeiten von Anfang an berücksichtigt hat, oder ob man nicht doch noch mehr Auszeichnungen braucht. Ja, das sieht man wirklich erst, wenn...manchmal vielleicht sogar, wenn Sie fertig sind oder in der Mitte drin sind oder denken: „Mann, an das habe ich nicht gedacht“, oder es kommt z.B. dann erst ein anderer Farbstift, das ist vielleicht noch eine einfachere Ebene, aber... Also ich habe das bisher immer erlebt, dass dann doch immer noch mal..., auch wenn es nur Kleinigkeiten waren, die dazukamen. Und wenn das System flexibel gestaltet ist, dann ist das nur gut für die editorische Arbeit, weil wir nie so starr das nach einem Schema F machen können.

**I20-13#I: Inwiefern sehen Sie Möglichkeiten, dass dadurch auch neue wissenschaftliche Erkenntnisse gewonnen werden können, durch diese Anpassbarkeit und digitale Unterstützung?** B: Sie meinen jetzt z. B. für einen Literaturwissenschaftler, der jetzt also das fertige Produkt oder sagen wir mal die elektronische Edition hätte zu nutzen, oder?

**I: Oder auch bei dem Prozess der Erstellung, sowohl als auch.** B: Also beim Prozess der Erstellung ist man selber ja auch, denke ich, noch mehr gezwungen, genau zu arbeiten. Also, das ist ja auch ein bisschen anders. Also, Sie müssen das Blatt ja erstmal ein bisschen... ja, die Topographie festlegen, die Räumlichkeit und haben dort eine andere Vorstellung. Also das habe ich jetzt auch als Nicht-Techniker. Ich überlege mir, welches Wort z. B. zuerst geschrieben wurde, oder wo ist überhaupt was beschriftet, wo ist was nicht beschriftet und das muss ich im Arbeitsprozess dann definieren und..., aber erst mal aber auch ganz, ganz genau beobachten. Wenn ich traditionell vorgehe und mich vielleicht auch nur für den Inhalt interessiere, ist das nicht relevant für mich. Wenn ich jetzt nur sehen will, was ist genau da geschrieben. Und so sind auch die traditionellen Editionen ausgerichtet, dass man sich dann auf den Text oder die Schrift konzentriert und vielleicht dann aber genetische Spuren einfach verwischt und nicht wahrnimmt. Und damit kann der Benutzer das nachher auch nicht wahrnehmen, wenn ich das nicht darstelle. Und da denke ich, habe ich durch die elektronischen Möglichkeiten..., kann ich dem Benutzer hinterher viel mehr Möglichkeiten geben, mit dem Text zu arbeiten. **I: Das heißt, das macht eine bessere Darstellung dieser räumlichen Verhältnisse, dieser Schichten im Text möglich.**

B: Ja, erstens das und da ist wahrscheinlich auch nicht die letzte Technik erfunden, aber man nähert sich immer so einem Ideal an, also möglichst genau das abzubilden oder zu transkribieren, was ich auf der Handschrift sehe, wobei es dann natürlich Abstufungen von der Handschrift zu dem Gedruckten oder zu dem elektronisch aufbereitetem Text gibt, aber dass man doch genauer wird, indem was

ich sehe, was ich beobachte. Und dann plötzlich auch vielleicht einfach nur, weil ich es nur als Ansatz oder nur als Versehen gedeutet habe und weggelassen habe, dann doch ansehe, es ist ein Ansatz zum Buchstaben, der vielleicht doch wichtig ist, den ich vielleicht dann doch darstelle. Oder dass ich auch bestimmte Streichungsarten, was für viele Autoren auch wichtig war, ob gleich die Seite gestrichen wurden oder jetzt gepunktet oder wie auch immer, dass man das auch differenzieren kann. Und was sich eben auch graphisch umsetzen lässt, ist für den Betrachter und Benutzer nachher, das geht visuell ins Gedächtnis rein. Das kann ich nicht beschreiben. Also ich kann es beschreiben, aber das bringt nichts. Und da sich die Wenigsten mit den Handschriften beschäftigen, geht durch diese glatte Textaufbereitung auch Informationen wirklich verloren. Und das ist aber in der Literaturwissenschaft generell noch nicht so bekannt, dass machen immer... die Editionswissenschaftler wissen mittlerweile was für ein Potential sich da verbirgt, aber diejenigen, die sich im Grunde genommen nur mit Theorien oder mit den Ausgaben beschäftigen, weil sie sie nutzen, aber nicht, weil sie sie herstellen, die wissen das oft nicht.

**I20-14#I: Ein ganz interessanter Punkt. Inwiefern könnte man auch Erkenntnisse aus diesem Vernetzungsaspekt gewinnen?** B: Jetzt mit anderen Projekten z.B. im TextGrid, dass ich sehe, wenn ich, ich hatte es schon angedeutet, also wenn ich z. B. sehe, dass vielleicht Kunsthistoriker, weil dieses Verhältnis Text-Bild ganz entscheidend ist, also wenn ich auch Notizbücher z.B. von bildenden Künstlern sehe, die sich natürlich bestimmte Dinge skizziert haben, das haben aber auch Autoren gemacht, als Sie auf der Reise waren, um bestimmte Sachen sich erstmal bildlich zu vergegenwärtigen, um nachher daraus einen Text zu schreiben, einen Feuilleton oder ein Buch oder was auch immer. Und dann kann man über die Disziplin hinaus oder auch über die Jahrhunderte hinaus vielleicht auch ähnliche Arbeitsweisen der Künstler feststellen und kann sich über diese Probleme dann ja auch wieder verständigen als Editionswissenschaftler und auch überlegen, was eine Darstellung angeht. Oder ich kann mich dann, wenn ich es dargestellt habe, auch über Theorien austauschen oder kann daraus Theorien entwickeln und sehen, das ist vielleicht kein Einzelfall, sondern das ist eben bei anderen Künstlern auch so. Und das ist, wenn ich natürlich eine Plattform habe, wo ich gleich die Produkte im Werden einlesen kann, dann ist es einfacher, als wenn Sie sich die Bücher ausleihen müssen. Und Sie kommen ja auch oft nicht auf die Idee, also Sie wissen ja nicht, was andere forschen, wenn jeder für sich, oder an der Universität vielleicht nur platt im Internet gerade ein Exposé bringt, das ist dann doch was anderes, als wenn Sie dann wirklich in die Arbeit vielleicht mal Einblicke bekommen. **I: Ja, das heißt es wird auch eine größere Sichtbarkeit der ganzen**



**Forschung auf einem Gebiet bspw. erreicht durch diese Vernetzung?** B: Ja, ja und man hat eben dann vielleicht auch wieder einen kritischen Blick auf die eigene Forschung, weil man das nicht so exklusiv darstellt, sondern sieht, es ist im Kontext zu sehen, dass andere, selbst sei es aus einem anderen Jahrhundert, ähnlich gearbeitet haben. Also, wir haben das auch an der Universität, wenn wir interdisziplinär zusammen kamen, so im Gespräch festgestellt. Aber ich stelle mir eben vor, wenn man an den unterschiedlichen Projekten arbeitet und da Einblicke bekommt, dann eröffnen sich für die eigenen Arbeiten immer neue Perspektiven und sei es, dass man bestimmte Dinge auch korrigieren muss. Oder man merkt, es ist ähnlich oder man sieht die Besonderheit, dass ich z. B. bei Fs Notizbüchern eben sehe, da sind nicht nur Tagebuchaufzeichnungen drin, sondern auch zu [Anonymisierung] seinen/ihren Werken schon erste Entwürfe, auch zu Gedichten oder [Anonymisierung] er/sie hat eben auch, wie gesagt, Zeichnungen drin von den Reisen, was auch nicht in allen Schriftstellernotizbüchern so drin ist. Und ich sehe dann wirklich die Besonderheit und das kann man dann auch für die literaturwissenschaftliche Forschung bereitstellen.

**I20-15#I: Aber wenn da so ein Netzwerk entsteht, das ja eigentlich auch zur Sichtbarkeit der Forschungsinfrastruktur beiträgt, besteht doch auch die Gefahr, dass man die Orientierung verliert, wenn man da drauf zugreift? Wie stellen Sie sich das vor? Stellen Sie sich das eher als ein Problem vor oder wie stellen Sie sich dieses Netzwerk überhaupt vor, wenn es es mal geben sollte?** B: Also man müsste wahrscheinlich erstmal für das anvisierte Projekt ein Kurzexposé verfassen. Also sei es, dass man ganz knapp nur skizziert, was man macht und welches Anliegen ist. Und, dass man jetzt schon, wenn man sich informiert als Außennutzer, dass man dann eben sieht, das könnte für mich relevant sein oder das weniger. Also, ich glaube, das ist ganz wichtig, weil ja jeder eine Unmenge an Material zu bewältigen hat. Und, ja also so könnte ich mir das vorstellen. Also, das würde ja auch im Grunde genommen auch so laufen, dass man auch Forschungsprojekte, die sich im Internet vorstellen, die müssen ja auch alle kurz skizziert werden, also dass man da irgendwie aufmerksam wird. Vielleicht auch eine Gesamtübersicht, was für Projekte laufen im Moment, als Stichwort nur, und dass man sich dann eben weiter vorklicken kann. **I: Also praktisch so eine Art Inhaltsverzeichnis eben dieser Infrastruktur.** B: Und auch vielleicht dann auch gleich Kontaktperson oder so, ich weiß nicht, wie das dann angestrebt wird. Es muss ja nicht jeder dann alles offen legen, das ist ja dann auch die Gefahr natürlich drin. Man hat ja immer Angst... Datenklau und Ideenklau und so weiter, wenn dann plötzlich Dinge sind, aber ich denke, man hat ja die Möglichkeit, manches auch nur

frei zu geben. Man muss ja nicht alles dann nach außen hin gleich schon in der Entstehungsphase sichtbar machen. **I: Ja, das ist ein großes Themenfeld. Also Zuordnung von Autorschaft, Copyright und nachhaltige Verfügbarkeit, das sind auch Punkte, da wird noch viel gearbeitet, da wird auch oft danach gefragt.**

**I20-16#Gut, abschließend eine zusammenfassende Frage: Was sehen Sie als den größten Fortschritt oder möglichen Fortschritt von TextGrid als digitaler Infrastruktur an und was sehen Sie noch als größtes Manko, als größte Barriere?** B: Also das hatten wir schon: Größte Barriere ist in der Tat, sich eben mit der TEI oder XML auseinander zu setzen. Also das ist wirklich die allergrößte Barriere und ich denke aber, dass der Nutzen so groß, also für mich so groß ist, dass ich die in Kauf nehme und das eine war eben dieser Austausch mit Wissenschaftlern, die Vernetzung, die elektronische Vernetzung und, das hatte ich noch nicht gesagt, dass die Werkzeuge, die Tools eben kostenlos bereitgestellt werden, ist für mich auch... das ist gigantisch. Weil, wenn ich jetzt daran denke, wenn ich jetzt selbst einen Antrag stellen muss, muss ich diese Dinge nicht mit Geldern irgendwie versehen als Sachmittelzuschuss oder wie auch immer. Das entlastet auch wieder dann die DFG oder andere Geldgeber enorm. Gut, das letzte, was für mich auch wichtig ist, was auch mit meiner Antragstellung zu tun hat, ist die Nachhaltigkeit, diese Langzeitarchivierung. Denn es haben ja viele ein Problem, die auch wirklich schon am Anfang elektronische Editionen hergestellt haben, die dann nicht mehr kompatibel waren oder der Server ist zusammengebrochen oder das Institut gab es dann nicht mehr oder sonstige Dinge und dann gab es die Arbeit nicht mehr, dann ist es verschwunden oder man musste es komplett umarbeiten. Und ich glaube, das haben die auch z. B. mit der M-Edition das Problem gehabt, das hat man mir auch erzählt, was Geld kostet, was Arbeit kostet, was Nerven kostet. Und das ist für mich auch ganz wichtig, dass ich weiß, das ist geplant über die Projektzeit hinaus, dieses Langzeitarchiv zu gründen, was auch Geld kostet wohl auch für den Nutzer, aber was ich denke von ganz, ganz großem Vorteil ist. Ich glaube, das gab es bisher so noch nicht. Wenn ich das jetzt so... ich habe mich nicht mit ganz vielen Dingen beschäftigt, aber mit denen ich gesprochen hatte, das ist wohl – glaub ich – ein ganz großer Vorteil. **I: Gut, dass waren jetzt die wichtigsten zusammengefasst. Da lässt sich jetzt auch nicht einer herausnehmen, den Sie als den entscheidenden Fortschritt sehen oder ist es einfach das Gesamtpaket, das es ausmacht?** B: Also ich es ist so, dass ich ja projektbezogen an TextGrid herangekommen bin und überlegt habe, welche Möglichkeiten habe ich, sowohl mein favorisiertes Buch als auch eine elektronische Edition zu machen. Und da ist die Möglichkeiten,

also das Gesamtpaket, wie Sie sagten, das ist was für mich..., was mich überzeugt hat, wo ich denke..., also die Punkte Nachhaltigkeit und diese Vernetzung, das wären wirklich für mich die beiden Hauptpunkte. Die anderen Dinge nehme ich sehr gerne dazu, also das mit Wörterbüchern oder, dass ich auf andere Ausgaben zugreifen kann, das wäre jetzt nicht für mich entscheidend gewesen, um da mitzumachen. Und ich denke eben, dadurch, dass es auch bisher so erfolgreich war, ist es auch für mich wichtig bei einer eigenen Antragstellung, wegen einem langfristigen Forschungsprojekt, dass man da eben mitmachen kann – was ich eben ganz wichtig finde, aber das ist eben für mein Projekt, jetzt aus der Perspektive heraus. **I: Gut, vielen Dank**
