# Supplementary material
Source: publisher site journal article supplement (https://www.degruyterbrill.com/publication/isbn/9783110463927/downloadAsset/9783110463927_Interviews.zip)
Supplement: Supplementary file 14 [file I21.pdf › Interviews/I21.pdf]

**I21-1#Interviewer: Inwiefern arbeiten Sie im Bereich eHumanities und wie würden Sie ihre Erfahrung in dem Bereich einschätzen und ihre Tätigkeit beschreiben?** Befragte/r:

eHumanities – ich arbeite zentral in dem Bereich. Wir befinden uns da am M-Institut, das ist ein Teil der Universität K, also eine Einrichtung der Universität K. Im Rahmen unseres Instituts befinden wir uns hier an einer Forschungsstelle, Arbeitsstelle, die ausdrücklich für den Zweck, designed ist, digitale Editionen zu betreuen, d. h. also die ganze Stelle ist so ausgeschrieben worden und erfüllt diesen Zweck.

**I: Ja, wie haben Sie da bisher gearbeitet? Mit welchen digitalen Methoden, Werkzeugen, Mitteln?** B: Ja, also das ist eine Geschichte, die in zwei

Teilen zu erzählen ist. Es gibt eine... ich arbeite schon lange in dem Bereich und der Beginn der Einbeziehung digitaler Instrumente in der M-Edition ist zu datieren auf das Jahr 1985. Da ging es darum, Computer zu verwenden bei der Transkription des Nachlasses Ms, ein umfangreiches Korpus und da gab es eine Phase, in der der Computer einfach als Schreibgerät verwendet wurde, um die Transkriptionen und die Verwaltung verbessern zu können, bequemer Korrekturen machen zu können. Ich kann dann auch genauer eingehen auf diese geschichtlichen Aspekte, aber um jetzt die Frage weiter zu beantworten, kam es dann zu einem ganz interessanten Wendepunkt im Jahr 1988, als das Thema auftauchte, den Computer nicht nur als Arbeitsinstrument zu verwenden, sondern die Publikation elektronisch zu machen. Das wurde dann auch gemacht. Das ist eine eigentlich spannende, amüsante Geschichte, welche Konflikte es damals auch gegeben hat, auch mit dem Verlag R, dem M-Verlag. Das Ergebnis war aber, dass wir im Jahr 1992 eine CD mit der Transkription der Texte Ms rausbrachten und der nächste Schritt war dann die Einsicht, dass das Ganze droht, in eine Sackgasse zu gehen, aufgrund der äußeren Rahmenbedingungen in der Entwicklung der Computer. Also das war 92, Windows 95 gab es da noch nicht. Was wir da verwendet haben als Software, war alles auf DOS abgestimmt. Und durch die Einführung von Windows 95 war man das erste Mal damit konfrontiert, dass vielleicht eine Offenheit gegenüber Betriebssystemen oder Formaten notwendig ist. Es gab einen Mitarbeiter, der inzwischen ein bekannter Mann ist in der Szene, am M-Projekt in M, das war J und der hat es dann übernommen, die Daten der M-Transkription von der CD in ein neues Format umzuschaukeln, nämlich wieder ein relativ geschlossenes Format, keine Open Source-Geschichte – und zwar Folio Views, das wurde verwendet für den G als Publikationsformat und wir haben uns mit M dann, eigentlich stimuliert von J, kann man sagen, für dieses Format entschieden. Und das ist bis heute das Publikationsformat, das Arbeitsformat der M-Edition, d.h. seit damals, also

ich hab dann im Jahr 99, d.h. von 99 an jetzt zehn Jahre haben wir alles, was wir gemacht haben, auf Folio Views abgestimmt gemacht. So hat sich das entwickelt.

**I21-2#I: Ah ja. Und mit welchen Erwartungen sind Sie dann an den TextGrid-Workshop herangegangen?**

B: Wir wollen auf alle Fälle vermeiden, dass sich das noch mal wiederholt, was uns da Mitte der 90er Jahre widerfahren ist, also dass unsere digitalen Editionen schon bald nicht mehr benutzbar sind. Das ist einmal der eine Aspekt, d. h. wir müssen uns überlegen, wie können wir die Edition, die sehr komplex ist, ein Informationssystem, das sich aus der Verknüpfung von Text- und Bildelementen zusammensetzt und auch zwischen Text und Kommentar, und es verschiedene Formen von ediertem Text gibt, die miteinander sprungverknüpft sind, das wir dieses komplizierte Gefüge betriebsystem- und formatunabhängig erhalten können. Das ist eine Aufgabe. Die zweite Aufgabe ist, das ist also die erste Stufe, die wir verwirklicht haben, und es gibt..., wir arbeiten dran, die Edition noch wesentlich zu vertiefen. Ich sage jetzt nur mal einen Satz dazu, damit das klar wird, in welche Richtung das gehen kann: Es gibt Manuskripte, die, wenn man sie konventionell in einer Edition wiedergeben möchte und entsprechend linearisiert, wo dann zu einer Manuskriptseite in einem A3-ähnlichen Format, vielleicht zehn A4-Seiten Transkription notwendig sind, aber die Transkription ist linearisiert, d.h. was sich am Manuskriptblatt verteilt, muss in der Transkription dann in eine lineare Ordnung gebracht werden. Und das ist noch sehr unbefriedigend. Und beim TextGrid-Workshop wurde mir sofort klar..., also der Workshop war für mich günstig konzipiert, weil er sich gerade mit der Möglichkeit exemplarisch auseinandergesetzt hat, Bilddateien und Text Punkt für Punkt miteinander zu verknüpfen. **I: Der Text-Bild-Link....** B: Das ist ein Feld, wo unsere M-Ausgabe noch extrem verbesserungsbedürftig ist. D.h. es gibt insgesamt zwei Bedürfnisse, einerseits die Überlebensfähigkeit der Daten zu sichern und andererseits das editorische Programm noch besser durchführen zu können.

**I21-3#I: Stichwort Linearität. Sie stellen sich das also so vor, dass das eine Art Netzwerk wird, ein Hypertext wird?**

B: Ja das ist es jetzt schon. Die Schwierigkeit ist, das Problem ist: Wie kann man seine hypertextuelle Struktur format- und betriebssystemunabhängig als Edition anbieten. **I: Also nicht nur die einzelnen Knoten im Hypertext linear hintereinander übertragen oder erhalten, sondern auch die Verknüpfungen?** B: Es geht um eine Entlinearisierung, d.h. Hypertext bedeutet, dass anstelle einer linear konfigurierten Struktur, so es in der Schriftdarstellung immer üblich war, eine Art Netzstruktur zu haben und auch in der Visualisierung alles zu tun, um diesen Netzcharakter auch präsentieren zu können. Und das

spezielle Problem ist: Wie kann das funktionieren, ohne in Abhängigkeit zu geraten zu ganz bestimmten Datenbankstrukturen, die programmiert sind, die ganz bestimmte Praktiken der Textauszeichnung usw. haben. Ich habe Ideen, darüber kann man dann diskutieren, wie das dann funktionieren müsste. Meine Frage ist auch, ob das anderswo auch als Problem gesehen wird. Ich hab schon den Eindruck, ... vor allem auch die Präsentation von Frau B und J, die Entstehungsgeschichte von G. **I: Also auch die Textgenese abzubilden in so einem Hypertext?**

B: Ja die Textgenese ist etwas, das den Rahmen der Linearität sprengt, weil eigentlich vertikale und horizontale Elemente miteinander verknüpft sind. Auf der einen Seite ist das Werk mit seiner Sukzession von Szenen und Textelementen innerhalb der eigenen Szene und auf der anderen Seite ist diese Vertikalität der Entstehungsgeschichte. **I: Ja und was wären ihre Ideen in dem Gebiet?**

B: Ja einmal vom Format ausgehend, planen wir, unsere Edition aus dem Folio Views rauszuholen, das ist jetzt schon zum Teil der Fall, indem nur der Text und die Verknüpfungsstruktur in Folio Views integriert ist und die Originalquellen als Bilddateien unabhängig vom Folio Views auf der CD sind, auf der DVD, es ist eine Double Layer-DVD, d.h. es sind annähernd 9 GB, organisiert so, dass es eine zentrale Datei gibt, eine Folio Views Infobase, die alle Texte und Verknüpfungen enthält, und von dort aus laufen Verknüpfungen zu in Ordnern organisierten Bilddateien. Und das Rausholen aus dem Folio Views würde bedeuten, den Text als PDF oder in HTML oder XML zu haben, unter Beibehaltung dieser Verknüpfungsstruktur.

**I21-4#I: Inwieweit sind denn ihre Erwartungen in dem Workshop erfüllt worden? Was war ihr Gesamteindruck?**

B: Ja, also ich habe gesehen, dass in TextGrid Möglichkeiten vorhanden sind für uns. Das Werkzeug, mit dem wir uns beschäftigt haben, das ist Verknüpfen von Text und Bild, einzelnen Bereichen innerhalb eines Bildes als Hypergrafik sozusagen. Andererseits ist auch klar geworden, wie mühsam das dann wäre, das alles händisch zu machen. Wenn man jetzt von dem ausgeht, was ich zuerst gesagt habe, so ein Schmierblatt Ms, das sind Texte, die in den Buchausgaben gar nicht enthalten waren. Das sind so Blätter mit inkohärenten Notizen. Es würde..., diese Umsetzungsart, die wir dort ausprobiert haben bei dem Workshop, würde pro Seite möglicherweise einen ganzen Tag in Anspruch nehmen und es gibt etwa 1200 Seiten.

**I21-5#Ob** man das dann überhaupt machen soll, ob dann nicht so ein gewisses Maß an Redundanz drinnen ist, ob man nicht – das wäre dann meine mehr oder weniger revolutionäre Idee – die Perspektiven von TextGrid so verstehen könnte, dass dieses Material in die TextGrid-Umgebung gestellt wird, und die einzelnen Forscher, das sind vielleicht alle zehn Jahre mal einer,

der ganz bestimmte textgenetische Untersuchungen anstellt und das dann selbst macht und das dann aber auch nicht weglöscht, sondern das für diese Manuskripte, mit denen er da gearbeitet hat, auch so lässt. Weil, das kann dann ja dann auch nur jemand machen, der auch die Handschrift lesen kann. Wenn das Ganze dann aber im Netz veröffentlicht ist, das Material, kann jemand, der bestimmte Forschungsinteressen hat, die Handschrift sehr schnell lernen, weil die Sachen ja dann eh schon Seite für Seite miteinander verknüpft sind. Und es nicht schwer ist, sich das einfach anzueignen, wie die Handschrift zu lesen ist. **I: Das würde dann eben nach und nach erweitert von unterschiedlichen Forschern an unterschiedlichen Orten?**

I21-6#B: Und da gibt es jetzt einen ganz wichtigen Punkt, über den wir unbedingt sprechen müssen. Das ist sicher bei anderen Editionsprojekten auch ein Problem – und zwar die urheberrechtlichen Komponenten bzw. auch das Konkurrenzverhältnis verschiedener Editionen und Editionstypen zueinander. Wir haben, wenn wir das ganz systematisch sehen, in der Editionsphilologie es mit drei Arten von Quellen zu tun, die überhaupt für so aufwendige Editionsverfahren interessant sind. Das erste sind die mittelalterlichen Quellen. Da geht es darum, dass wir dieses ganze Instrumentarium aufwenden, weil das keine Bücher sind, sondern weil das eben die Texte sind, die in der Zeit vor dem Druck entstanden sind, und da war eben seit dem 19. Jahrhundert die fixe Vorstellung da, daraus Bücher zu machen. Das ist so die Grundidee des historisch-kritischen Edierens, um die Texte für das Buch, für das Leserpublikum lesbar zu machen. Und die Bedeutung des digitalen Edierens liegt nun darin, das hat gerade die Frankfurter Tagung sehr schön gezeigt, wo die Mediävisten für mich am präsentesten waren, dass eine absolut sinnvolle Zurückführung sozusagen wieder aus dem Buch heraus stattfindet. Da haben wir überhaupt gar kein Problem. Die zweite Quellengruppe, das sind die Klassikereditionen. Das sind Autoren, die eigentlich gedruckt wurden, wo es autorisierte Text gibt, wo es aber andere Materialien gibt, die die Entstehungsgeschichte dokumentieren, und wo der Rang, der Status des Autors, also sein Platz im Kanon, es erforderlich macht, alles andere auch in Betracht zu ziehen und in eine Edition mit einzubeziehen. Da gibt es dann kaum etwas, was als redundant betrachtet werden kann, weil der hohe Status des Autors auch jedes biografische Dokument für wichtig erachtet. **I: Briefverkehr.** B: Alles, genau, die Briefe sind da besonders wichtig. Und das führt dann zu einem Editionsverfahren, das auch wieder die Grenzen des Buches tendenziell sprengt, und da hat dann eine Digitalität auch ihre Chance. Erstens einmal Ökonomisierung, dass dann so Werkausgaben, wo wirklich alles drin ist, eben sehr reich an Bänden wären, das hat dann alles auf einer DVD Platz. Das sind dann alles Dinge, die bei M dann schon eine Rolle spielen. Aber

es gibt auch einen dritten Typ, oder ein drittes Feld, das wir bearbeiten und das sind alles die Texte, die schon gar kein Buch geworden sind, die schon gar keine Autorautorisierung erlangt haben. Und das ist ein spezielles Problem der literarischen Moderne, das lässt sich auch terminisieren. Das ist vielleicht ziemlich am Ende, da haben wir auch in Frankfurt drüber diskutiert. Wenn die Autoren mit dem Computer arbeiten, dann schaffen sie diese Art von Fragment auch gar nicht, produzieren das gar nicht mehr. Es geht von Georg Büchner bis Ingeborg Bachmann vielleicht mit dem Todesaffen-Zyklus, also bis vielleicht in die 60er, 70er Jahre des 20. Jahrhunderts. Und da tritt eigentlich derselbe Effekt durch die digitale Editionsweise auf, wie bei den mittelalterlichen Quellen. Es ist kein Buch. Kafkas Romane – sein Prozess ist kein Buch. Und da werden dann Editionsverfahren interessant, die das Buchhafte wieder aufheben. Ich weiß nicht, ob Sie mit der Debatte vertraut sind, die um die historisch-kritische Kafka-Ausgabe von Reuß ständig geführt wird und die Haltung Reuß gegenüber der Digitalität. Den besuchen Sie nicht? Aber Sie wissen wer das ist? **I: Ja, aber es wäre natürlich hochinteressant, bisher ist mir die Debatte nicht so genau bekannt.** B: Also Reuß hat ja in der allerersten Nummer des Jahrbuchs für Computerphilologie einen Beitrag drinnen. Und er sagt klipp und klar, warum er nicht digital ediert. D. h. er verwendet zwar den Computer. Es sind ja auch bei diesen Faksimileausgaben, Faksimile-Transkription, -Kommentar, die die veranstalten, immer CDs dabei mit PDF-Versionen. Aber er verwendet nichts, was für digitale Editionen mittlerweile typisch geworden ist. Erst einmal verzichtet er nicht auf das Papier. Er verwendet keine Sprungverknüpfungen und er möchte, dass diese Buchnähe, deshalb auch das PDF-Format, auf alle Fälle gewahrt bleibt. Und das ist ein Punkt, da muss man, wenn man reflektiert zu Fragen der digitalen Editionsphilologie, diese Diskussion muss man unbedingt führen. **I: Was ist denn sein Argument dafür?** B: Seine Argumente sind teilweise krude, wenn ich das jetzt so aus dem Kopf referiere gibt es zwei Richtungen: Erstens diskutiert er mit der Materialität der Handschrift. Also der Begriff der Materialität ist da ganz zentral. Und er sagt, also die Aufgabe der Edition ist eigentlich in erster Linie, das Faksimile darzustellen, möglichst perfekt zu biegen. Nachdem das Faksimile, also das Original Papier ist, sollte das Faksimile auch wieder Papier sein. Er bringt..., also seinem Editions-konzept entspricht es, möglichst gute Faksimiles, originalnahe Faksimiles zu bringen und als Beiwerk, also es darf keinen edierten Text geben in der historisch-kritischen Edition, sondern nur eine Transkription als Lesehilfe und eine ausformulierte Entstehungsgeschichte. Das, was der Editor weiß, das erzählt er sozusagen. **I: Ah, aber das ist doch eigentlich eine selbstauferlegte Beschränkung. Oder wie sehen Sie das?** B: Ja, das ist

ihm wichtig, weil alles andere würde eine Verfälschung bedeuten und die, die solche Texte herauspräparieren aus den Manuskripten, sind eigentlich Verfälscher. Und das zweite Argument, das er in den Debatten, die ich mit ihm hatte, dann immer und immer stärker geworden ist, ist eine absolute Skepsis und Kritik gegenüber der ökonomischen und medientheoretischen Macht digitaler Medien. Es ist ja eigentlich ein linker, ein 68er-Widerstand gegen Bill Gates irgendwie. Er argumentiert zusammen mit seinem Verleger gegen die ökonomische Macht sozusagen, die über die Betriebssysteme und über kommerzielle Formate ausgeübt wird. Da kommt dann etwas dazu, das ich stark kritisiere, da ich diese Position eigentlich für ideologisch halte, weil in Wirklichkeit möchte er das Buch, weil er mit einem Buchverlag zusammenarbeitet, der diese Editionen sehr teuer druckt und es ist.... Das andere, was ich zuerst gesagt habe, sehe ich ja sehr positiv, nämlich zu sagen, es ist kein Buch, keine Materialität, man muss die Manuskripte möglichst genau wiedergeben und dann Lesehilfen zur Verfügung stellen. Da kann ich folgen. Ich würde z.B. Kafkas Prozess nach der Editions Methode, also die reußsche Edition des Prozess, diese Hefte, diese Großbandhefte, diese Faksimiledrucke im Unterricht mit Schülern am Gymnasium verwenden. Die würden dann lernen, was der Prozess ist und sich mit diesen ganzen Fragen des Unfertigen, der Unklarheit, wie dann die Reihenfolge der Kapitel ist... Das gehört genauso dazu beim Lesen und Sprechen über diesen Text wie alles andere. Und ich würde es, das habe ich ihm auch gesagt und beschrieben, ich würde die CD verwenden und ich würde allen Schülern eine Raubkopie geben. Mehr möchte... brauch ich vielleicht gar nicht sagen, das ist nämlich der springende Punkt. **I: Ja, aber eine hoch interessante Debatte gerade im Bezug auf TextGrid. Wäre interessant, ihn mal zu einem Workshop einzuladen. Vielleicht würde er aber nicht kommen.**

I21-7#B: Ich habe..., das Ganze ist eine wichtige Frage. Weil Sie haben die recht strategisch..., ich möchte fast sagen editionspolitisch... Sie haben den Workshop auf der Tagung für germanistische Editionen angeboten und es gibt eben Institutionalisierungen außerhalb. Das betrifft jetzt konkret also dieses Institut in Heidelberg, Reuß, Morgenthaler und Groddek, das betrifft z.B. jetzt uns Österreicher. Wir sind zwar in der Arbeitsgemeinschaft integriert, aber TextGrid in der Form ist eine Initiative, die auf Deutschland einmal beschränkt ist und von Deutschland finanziert ist. Und es wäre also interessant, zu erwägen, Außenseiter, sei es Österreich, sei es den Reuß, in die Debatte einzubeziehen. Und ich habe nicht den Eindruck, dass der Reuß zu diskussionsunwillig ist, sondern im Gegenteil. Er hat durch die Vehemenz seiner Debattenbeiträge so eine Art Abwehr verursacht und sich dann auch selber zurückgezogen. Und

als die DFG sein Projekt vor zwei Jahren abgelehnt hat und dann ein großes Rauschen im Blätterwald war, hat man bemerkt, dass er doch auch Unterstützung bekommt, also auch von konventionelleren Editoren. Das ist ein Hin und Her und ich glaube, das Ganze würde davon profitieren, wenn man sich mit ihm auch auseinandersetzt.

**I21-8#I: Wo wir gerade auch dabei sind, bei dieser Community in den Editionswissenschaften überhaupt, also dieser Forschungsgemeinschaft mehr oder weniger: Das TextGrid soll ja eine Forschungsinfrastruktur werden, soll ja dadurch aufgebaut werden. Welche Potentiale sehen Sie da und welche Bedeutung messen Sie dem Thema zu?**

B: Ich glaube, da gibt es eine gewisse Dialektik. Einerseits Infrastruktur, andererseits auch etwas, was mehr ist als eine Infrastruktur, sondern das auch in der Lage ist, Wirkungen zu erzeugen, d.h. das geht auch in die Richtung, dass in diesem Rahmen publiziert wird und jetzt nicht nur eine Infrastruktur ist, sondern auch so eine Art Klammer, die so Wissenssysteme produzieren und die Rezipienten miteinander verbindet. Und meine Assoziation zu ihrer Frage ist zunächst einmal die, wenn wir jetzt von dem zweiten Punkt reden, dass ein besonderer Gedanke bei dem Ganzen, was ich so gelesen habe auch an Hintergrundinformationen, was die da auf ihrer Internetseite haben zum TextGrid, also ein Grundgedanke bei der Initiierung des Ganzen betrifft doch, Wissenschaftler dazu zu bringen, sage ich jetzt mal ganz global, das kulturelle Erbe zu sichern und in Digitalität zu überführen. Da geht es nicht so sehr um diese instrumentellen Aspekte, sondern um diese konservierenden und vermittelnden Aspekte. Und wir haben in Österreich auch, das war also noch bevor diese Krise ausgebrochen ist, aber TextGrid war auch schon genehmigt, als die Krise kam, und bei uns lief das irgendwie schlecht, also ein ähnliches Vorhaben: Die Universitäten wurden aufgefordert, zur Sicherung des kulturellen Erbes im digitalen Medium Strukturen und Instrumentarien zu entwickeln und dann auch Inhalte zu liefern, die sozusagen prototypisch wirken sollen. Und das Netz soll dann zunehmend gefüllt werden. Und dieses Programm mit der Abkürzung NIKE – „Netzwerk Initiative kulturelles Erbe“, wurde groß ausgeschrieben mit der Verheißung: viele Drittmittel für die Universitäten. Ich sehe das wirklich als Parallele zu TextGrid und dann gestoppt aber, weil auf einmal es kein Geld mehr gab. Es ist einfach gestorben, weil der Staat den Banken unter die Arme gegriffen hat. Um jetzt auf TextGrid zurückzukommen und auf die Potentiale, ich sehe die Hauptbedeutung darin: Was wir eigentlich brauchen sind digitale Strukturen, die – sagen wir mal – das kulturelle Erbe überführen aus der Umgebung aus den Archiven, wo diese Dinge schlummern, oder Museen oder Bücher, in die digitale Umgebung des Internets. Darum geht es eigentlich bei dem Ganzen. Das

ist also das höchste Ziel. Und die Fragen, diese technischen Einzelheiten, diese instrumentellen Fragen, also z.B. M-Edition, wie ich dann eine Handschrift, die Bilddatei mit dem Text verknüpfe, das ist auf einer tieferen Linie, da glaube ich eben, da können sich dann Einzelne damit beschäftigen, wenn das große Ganze einmal geschafft ist.

**I21-9#I: Aber es gibt doch noch eine andere Ebene, nämlich die des Austauschs und der Zusammenarbeit über so eine Infrastruktur. Wie ist da ihre Ansicht?**

B: Ja, ja das ist ganz richtig. Also das kommt in der Hierarchie für mich noch weiter oben wie die einzelnen Editionsprojekte. D.h. die primäre Ebene, das Hauptziel des Ganzen, ist, überhaupt eine Struktur zu schaffen, indem ich die Inhalte des kulturellen Erbes digital vermittele. Dann auf der zweiten Ebene über diese Originalbestände und ihre digitale Repräsentanz eine Kommunikation aufzubauen, wobei es wirklich wichtig ist, den Kultur- oder Kunstbegriff möglichst offen zu halten. Denn wir haben am Rande der Editorik so eine interessante Diskussion über den orthographen Wert von Dokumenten. Sie wissen ja, Orthographen werden gehandelt und haben einen irrsinnig großen Wert als Handelsobjekte, der mit ihrem ästhetischen oder wissenschaftlichen Erkenntniswert oft nicht korreliert, und es wäre schon deswegen eine Erleichterung, so ein Art digitales Archiv, wo alles drin ist, was wichtig ist und interpretierbedürftig und forschungswürdig, so ein digitales Archiv wäre schon deshalb wichtig, weil es uns sozusagen vom Kampf oder Nachlaufen nach dem Original befreien würde. Um jetzt wirklich ein extremes Beispiel zu bringen, das Doriner Leichtuch, dass das der Vatikan als Original nicht aus der Hand geben will ist klar, da haben sie auch Recht. Aber, dass es komplett digitalisiert wird, hin bis zu Daten über chemische Proben und so, und das alles ins Internet gestellt wird, damit die Forschergemeinschaft weltweit dann sozusagen auf dieser Datenbasis Überlegungen anstellen kann und Hypothesen formulieren, würde sehr viel helfen. Und das gilt, würde ich sagen, generell und da liegt ein ganz besonderes Potential drinnen.

**I21-10#I: Da kommt ja eine weitere Ebene dazu, nämlich auch die Zusammenarbeit über solche Strukturen oder digital unterstützte Kollaboration, also Zusammenarbeit an einem Projekt.**

B: Ja, also das halte ich auch für sehr wichtig, davon verspreche ich mir sehr viel. Also bei den großen Editionsprojekten, Korpora-Erschließungsprojekten, gibt es immer mehr das Moment der Dislozierung. Bei unserem M-Projekt war es bisher so, dass wir nicht so gut kommunizieren konnten, wie wir es gebraucht hätten. Also ich rede jetzt von den letzten zehn Jahren. D.h. also das ist vielleicht auch in Deutschland eine typische Struktur: Es gibt Universitäten, die am flachen Lande gelegen sind, die Universitätsstädte, die leben letztlich von



ihren Studenten, da gibt es in jedem Jahrgang einen, der brauchbar ist und den man heranziehen kann, aber das reicht oft nicht aus bzw. gibt es oft ähnliche Projekte ganz anderswo und man würde oft gerne das Know-How dann von dort holen, aber kann den Menschen in seiner Funktion nicht transferieren. Das ist eigentlich eine ganz normale Situation. Wenn wir heute ein größeres Korpus-Erschließungs-Projekt beginnen, haben wir das Problem, dass wir ganz genau wissen, wer daran mitarbeiten könnte, wer die Kapazität oder die Kompetenz hat, und es wahrscheinlich nicht geht, den jetzt daher zu lotsen, sondern es bleibt nichts anders übrig, und wir hatten das bei M, also wenn Sie sich die Liste anschauen der insgesamt fünfzig genannten Mitarbeiter und Mitarbeiterinnen in diesen zehn Jahren, die sind im ganzen deutschen Sprachraum gesessen, etliche in Berlin, in Saarbrücken, in der Schweiz und wir haben ziemlich umständlich..., weil wir ja diese Folio Views hatten als Format und das ist keine wirkliche Netzwerk-Anwendung. Es gibt eine Netzwerkversion, aber auch bei der geht es nicht, dass mehrere Leute an verschiedenen Plätzen an dem einen arbeiten, d.h. in einem Wort, das ist unheimlich wichtig, wenn ich die Möglichkeit habe, an so einem Erschließungsprojekt ortsunabhängig zu kooperieren.

**I21-11#I: Und sehen Sie da eine problemlose Umsetzungsmöglichkeit oder haben sie da schon mal mit was Ähnlichem gearbeitet, was angeboten wird?** B: Eigentlich nicht, also es ist... Die Debatten über Kooperationen haben immer in Debatten über Formate gemündet. Da sehe ich eigentlich das größte Potential, wenn es möglich wäre, eine Infrastruktur aufzubauen, über die Kooperation bei der Digitalisierung und Erschließung von Quellenkorpora möglich wäre. Das wäre eigentlich die größte Chance. Jetzt wo sind die Grenzen oder welche Gefahren oder Barrieren gibt es zu überwinden? Ein Problem sehe ich einmal, es ist immer eine Gefahr, dass das TextGrid auch zu einem Format wird. Dass man das so sieht: Ich will nicht da mitmachen, weil damit gebe ich mein Format, mit dem ich bisher gearbeitet habe, auf und ich müsste mich irgendwo einer neuen Struktur unterwerfen. Das ist einmal ein Problem. Das zweite Problem ist diese institutionellen und nationalen Probleme, so was müsste eigentlich gesamteuropäisch sein. Ich weiß jetzt nicht, wie das bei TextGrid ist. Da gibt es ja auch diese europäische Dimension. Das ist ja jetzt auch bei dem Aachener Projekt mit diesem elektronischen Schreibtisch und mit dem, was die da machen, dass das in Kooperation mit den Niederlanden und mit Großbritannien geschieht. Ich glaube, wir müssen jetzt in Bezug auf Kommunikation und Kooperation schauen, dass die nationalen Grenzen und die Sprachgrenzen keine Rolle spielen.

**I21-12#I: Gesetzt den Fall das wird so, dann wäre diese Infrastruktur ja sehr komplex und sehr umfassend. Inwiefern sehen Sie da eine Gefahr, dass man sich da nicht mehr**

**orientieren kann? Und wie könnte man ihr begegnen?** B: Ja, das ist eine berechtigte Frage. Zum Orientierungssinn sind folgende Dinge wichtig, glaube ich: Erstmal was Sie jetzt schon begonnen haben, so eine Informationspolitik mit Workshops. Da wäre jetzt konkret für uns auch anzudenken, ob man die TextGrid-Initiative verwenden könnte, um in O diese abgestorbene Debatte nach dem Tod des vorhin erwähnten N-Projekts wieder anzufachen, dass Sie einen Workshop machen, zu dem Sie die jeweils mit Editorik befassten Vertreter der fünf Germanistik-Standorte, es sind ja nur fünf in O, einladen, das müsste vom O Wissenschaftsfond mitfinanziert werden, um einfach Grundorientierung über diese Möglichkeit und auch eine Eingliederungsmöglichkeit für die O-Editoren herzustellen und mit dem Hintergedanken, dass dadurch die ganze Debatte einer besseren Kooperation der Editionsprojekte in O vorangekurbelt werden würde. Dann der zweite Aspekt ist zur Orientierung jetzt in einem ganz anderen Sinn, also für einzelne Rezipienten, also Nutzer, ist es, glaub ich, wichtig, so eine Dokumentationsebene zu haben. D.h. dass es jenseits von Fachjargon, ich stell mir vor, so eine eigene Art Datenbankstruktur, wo jedermann sich einen Überblick schaffen kann und auch seine Suchen mit ganz einfachen Suchmasken starten kann. **I: Wird die Architektur ein bisschen abgebildet...** B: Ja, also das ist eine Frage der Architektur, d.h. also zwei Elemente in der Architektur, das eine ist so eine Einführung, so eine Struktur, die nicht unbedingt eine der Leute ist, die dann darin arbeiten, sondern so ein Überblick, so eine Grafik oder so etwas, die anschaulich darstellt, welche Bereiche es überhaupt gibt, was das Ganze überhaupt ist und was man überhaupt finden kann und was man nicht finden kann. Und das Zweite ist, das ist für Nutzer, die einfach nur man schnell zugreifen, das machen wir immer, wenn wir im Internet etwas suchen, so eine Art Google auch für dieses TextGrid-Spektrum.

**I21-13#I: Wo wir grade auf dieser Ebene angekommen sind, gehen wir mal von dem Nutzer aus, der nicht unbedingt versiert ist in dem Bereich, sondern der das einfach ohne großes Vorwissen nutzen will. Für wie bedingungsfreundlich und erlernbar halten Sie das Ganze? Sie haben ja das TextGrid-Lab jetzt mal kurz getestet, wie ist ihr Eindruck?** B: Das kann ich schwer sagen, das habe ich auch bei dem Fragebogen, den ich dort gleich ausfüllen sollte, eher verweigert, diese Frage. Ich glaube, dass passive Benutzer, die einfach in das Laboratorium gehen, um sich zu informieren – Gibt es da etwas? Finde ich da eine bestimmte Information? – dass die ganz andere Bedürfnisse haben, als Leute, die mit den Werkzeugen arbeiten wollen, weil sie selbst etwas erstellen. Und wir können jetzt nur von der zweiten Gruppe sprechen und da habe ich den Eindruck gehabt, dass es leicht zu bedienen war, dieses eine Werkzeug, mit dem wir uns

beschäftigt haben, und dass es fast auch selbstexplikativ ist. Es war kaum notwendig, der ganze Aufwand von Leuten, die dann da waren. Man hat es eigentlich relativ schnell kapiert, weil ja da nur Leute auch nur arbeiten mit dem Werkzeug, die schon gewisse Vorkenntnisse haben.

**I21-14#I: Aber im Bezug auf die andere Nutzergruppe, die eher passive, würde dann ja ein Element fehlen, die einfach nur Zugriff haben wollen...?**

B: Die Frage kann ich Ihnen nicht recht beurteilen, weil ich mich da noch nicht genug damit beschäftigt habe, da war der Workshop ja auch nicht drauf ausgerichtet, welche Möglichkeiten es dann gibt. Das hängt ja auch davon ab, welche Korpora schon eingestellt sind und über das TextGrid zu erreichen sind. Ich weiß nicht, wie viel ist das denn überhaupt, kann man das überhaupt beziffern? **I: Ja, aber nicht auf die Schnelle. Es gibt schon einiges, was drin ist. Es wird auch daran gearbeitet, an weiteren Kooperationen, aber ja es ist noch im Aufbau.**

B: Weil es ist..., was Sie jetzt da angeschnitten haben, das ist ein grundsätzliches Problem bei diesen Sachen, nämlich auch bei jeder Edition. Da können wir zurückgehen noch in die vordigitale Zeit, dass alle diese komplizierten Informationssysteme, die historisch-kritische Ausgaben ja sind, darunter leiden, dass eigentlich nur der, der es gemacht hat, sich eigentlich auskennt. Und das ist in meinen Augen fatal und es ist besonders wichtig, hier etwas zu erreichen. Damit steht und fällt eigentlich das Ganze. Weil, wenn das ein Werkzeug wird, das zu noch mehr Spezialisierung führt, wäre es schlecht. Sondern es wäre gerade interessant, dass das zugänglich wird, was man da bearbeitet hat, dass die Oberfläche, die Suchmöglichkeiten so gestaltet sind, dass wirklich jeder, der irgendwas wissen will oder nach irgendwas sucht, auch etwas findet. So nach dem Wikipedia-Prinzip. Aber es gibt noch viel bessere Möglichkeiten, also das Wikipedia würde ich jetzt nicht als Ideal hinstellen. Es müsste ein relativ großer Teil der ganzen Entwicklungsarbeit auch dahinein gehen. Diese, sagen wir mal, Oberfläche innerhalb der Architektur, die einfach für den normalen Benutzer ist.

**I21-15#I: Ja, jetzt davon ausgehend, aber auch vor dem Hintergrund all dessen, was wir alles besprochen haben, welche Möglichkeiten zur Erlangung neuer wissenschaftlicher Erkenntnisse sehen sie denn durch digital unterstützte Forschung?**

B: Ja das ist auch interessant, die Frage. Also, das kann man jetzt an M festmachen. Da gab es auch Misserfolge. Misserfolge, aus denen man lernen muss. Die CD von 1992 war nämlich in dem Sinne auch ein Misserfolg als sie wenig gekauft wurde, weil sie zu teuer war und eigentlich das, was man wollte, nicht erreicht wurde, nämlich, dass eine intensive entstehungsgeschichtlich orientierte Forschung, aber auch so computerlinguistisch orientierte Forschung, dass also das komplett transkribierte Korpus verwendet wird als Basis, um wirklich Untersuchungen zu machen, die das ganze

Material zur Verfügung haben, um wegzukommen von dieser irgendwo..., von dieser falschen Interpretationsmethodologie, die ihre Ursache darin hat, eben nicht das ganze Korpus zur Verfügung zu haben. Verstehen Sie, was ich meine? Bei M war das Problem, da gibt es diesen Roman mit über tausend Seiten und dann gibt es eine Buchausgabe, das war die Situation in den 80er Jahren, die noch einmal tausend Seiten aus dem Nachlass bringt. Und dann gibt es aber vielleicht noch einmal tausend Seiten, die noch nicht gedruckt sind. Und das hat zur Folge gehabt, dass die Interpretationen so angelegt waren, dass sie das schon berücksichtigen haben. Entweder es steht vorne im Vorwort drin: Mit dem Nachlass habe ich mich schon gar nicht beschäftigt, weil der gehört nicht zum Werk und man bringt dann irgendwelche Argumente, warum man sich mit dem Nachlass nicht beschäftigen muss, weil nur das vom Autor Autorisierte wollte er überhaupt veröffentlichen und das andere hatte er aus guten Gründen nicht veröffentlicht usw. usf. Was oft gar nicht stimmt, die werden dann aus den Haaren herbeigezogen, diese Argumente. Jetzt ist es so, das ist jetzt mal ein Aspekt, das ist also etwas, das die digitale Aufbereitung von Korpora leisten kann ist, dass wirklich vollständig das ganze Material da ist und eine Analyse zu jeder beliebigen Fragestellung eben auch automatisiert bzw. über Automatismen unterstützt, jede Analyse am gesamten Korpus stattfinden kann. Das alleine rechtfertigt digitale Editionen komplett.

I21-16#Jetzt gibt es aber auch noch andere Aspekte. Ein anderer Aspekt ist, also oft wird gesagt – und das wurde uns auch damals gesagt, als wir mit der CD 1992 rauskamen – es ist schon ein Unterschied und es ist schon auch besser, ich lese etwas Seite für Seite, d.h. wenn ich irgendetwas im Archiv angreife, dass ich dort bin und das Original in die Hand nehme, weil ich ja dann den authentischen Zusammenhang der Überlieferung auch mitbeachte. Also das ist so, wie wenn Sie in ein Zeitungsarchiv gehen und einen ganz bestimmten Artikel, auf den Sie aufmerksam gemacht worden sind, aufsuchen und dann den Jahrgangsband aufschlagen und dann blättern Sie vor und zurück, dann sehen sie etwas, was scheinbar damit überhaupt nix zutun hat, aber das eröffnet Ihnen trotzdem ganz neue Einsichten, weil z.B. auf der Seite davor ein anderer zeitgenössischer Autor etwas geschrieben hat und Sie dann irgendwie so in die Zeit hineingeraten. Also das sagen viele Leute, die in Archiven arbeiten, das sind eigentlich die größten Entdeckungen, dass sie dann beim Blättern etwas gefunden haben, was sie eigentlich gar nicht gesucht haben, so! Und wenn Sie jetzt aber mit dem digitalen Medium arbeiten, dann schreiben Sie einen Suchbegriff in die Suchmaske hinein, finden alle Treffer und haken das Ganze ab. Und dann sehen Sie auf einmal nix mehr, dann gehen Sie so vor. Das ist das

Argument. Meiner Meinung nach stimmt das nicht. Man könnte das genau umgekehrt sagen. Und das kommt natürlich auch drauf an, wie ediert wird. Und das, was ich jetzt von TextGrid-Lab mitbekommen habe, da sehe ich eben da ganz gute Chancen – nämlich beim Edieren extrem drauf Wert zu legen, solche Überlieferungszusammenhänge zu wahren. Dh. dahinter steht eben dieses auch von Reuß vertretene Argument, möglichst das originale Dokument, so wie es ist, zu edieren. Ich bin dann auch der Meinung, dass daraus neue Erkenntnispotentiale erwachsen. Alleine durch die Möglichkeiten zu zoomen, etwas anders zu sehen, durch die ... wie soll man sagen, Apparaturwechsel, die der Computer anbietet, also dass ich etwas mal um 50 Prozent verkleinert oder um 200 Prozent vergrößert, also etwas sehe, was ich mit meinem Auge nicht sehen könnte – d. h. unter der Voraussetzung erstens einmal möglichst originäre Überlieferungszusammenhänge zu berücksichtigen und darzustellen und zweitens aber unterschiedliche Texte zu edieren, aus ein und derselben Quelle. Das kann ich am Computer auch gut. Ich kann also sozusagen mehrere Programme entwickeln, nach denen aus einer Quelle ein edierter Text generiert wird. Das haben wir bei M auch gemacht. Also wir haben so ein Segment in unserer Edition „Lesetext“ und das ist optional, das kann ich so oder so machen, diesen Lesetext, und daraus ergibt sich auch ein zusätzliches Erkenntnispotential. In einer herkömmlichen Buchedition verstellt oft die Sturheit der Editionsmaxime den Blick auf den Text und verfälscht ihn dann auch tatsächlich. Und am Computer kann ich einfach den Text einmal so und einmal so und einmal so wahrnehmen. Auf das läuft es raus.

**I21-17#I: Gut, abschließend eine Doppelfrage praktisch. Wir haben jetzt ganz viele Möglichkeiten aufgezählt, die sich bieten durch digital unterstützte Forschung. Was sehen Sie als den größten potenziellen Fortschritt, den TextGrid bieten könnte und was sehen sie noch als Problem, als größte Barriere.** B: Um zuerst einmal von den Nachteilen zu sprechen: Es ist vorhin schon angeklungen. Ich glaube, eine Barriere stellen vielleicht jetzt noch dar, zunächst einmal, es läuft auf das hinaus, dass es zu wenig vermittelt ist. Es ist jetzt vielleicht der erste Schritt gesetzt über den Workshop auf dieser Tagung, dass das Ganze erst einmal bekannt wird und solange das nur in Deutschland und nur in Einbeziehung einzelner weniger Editionsprojekte läuft, hat es immer noch die Gefahr, hart gesagt, in diktiererische Richtung zu laufen, was ja immer das Problem bei allen Werkzeugen seit TUSTEP schon seit den 70er Jahren war, dass das dann irgend ein Guru oder eine Gruppe ist, die das vertritt und sagt: Wir haben das und die anderen machen nicht mit und die Folge ist, dass das Ganze nicht in die Breite geht, sondern verkrampft sich irgendwo in der Tiefe. Man entwickelt dann eine Terminologie und

Sonderinstrumentarien, die dann eben nur für die wenigen Projekte wichtig sind, die da drin sind. D.h. also jetzt ins Positive gesagt, sind wir uns drüber einig: Das Potenzial besteht, das entwickeln zu lassen, möglichst unter der Beteiligung aller. D.h. also die Aufgabe wäre es, sage ich jetzt einmal als Vertreter der d-Welt, die Schweizer, die Österreicher reinzukriegen, eine möglichst enge Durchführung mit anderen, nicht-deutschsprachigen Universitäten auch zu haben und dann auch das Problem zu lösen, wie wird es möglichst benutzerfreundlich für die passiven Benutzer, die von draußen kommen und etwas suchen. So sehe ich das. D.h. den Hauptvorteil sehe ich darin, dass sowohl durch die einzelnen Bestandteile des Labs, so wie wir das geübt haben mit den Verknüpfungen zwischen Bild und Text, sehr gute Werkzeuge da sind, als auch dieses wichtige Ziel des Betriebssystem-Unabhängigen – einfach eine Plattform, ein Forum für alle bieten. **I: Die dann auch Eigenentwicklungen anschließen können.** B: Genau, da sehe ich den größten Vorteil. Das war ja bisher nicht. Das ist dort bei dem Workshop, wenn ich mich richtig erinnere, auch die Frage nach der TEI-Kompatibilität, ob man dann eben das auch mit einbeziehen kann, was da erarbeitet ist an Textauszeichnungscodes. Die Antwort war positiv, dass das Ganze auch XML-basiert ist und diese TEI-Tags dann auch in dem Rahmen auch weiterentwickelt werden können. Das sind sicher die ganz, ganz großen Chancen, die da drin liegen. **I: Gut vielen Dank.**
