# Supplementary material
Source: publisher site journal article supplement (https://www.degruyterbrill.com/publication/isbn/9783110463927/downloadAsset/9783110463927_Interviews.zip)
Supplement: Supplementary file 16 [file I23.pdf › Interviews/I23.pdf]

**I23-1#Interviewer: Inwiefern arbeiten Sie denn in dem Bereich eHumanities – digital unterstütztes wissenschaftliches Arbeiten? Wie würden Sie ihre Erfahrungen und ihre Tätigkeit beschreiben?**

Befragte/r: Ich bin in dem Bereich der Editionswissenschaften tätig, habe mich ein bisschen mit Theorie der Edition beschäftigt, bin aber eher die Praktikerin. Also, ich habe für mich vor einigen Jahren ein Konzept einer dynamischen Editionsweise entwickelt auf der Basis von üblichen Programmen, die man so auf einem Standardarbeitsplatz hat. Also ich hab bisher mit WinWord gearbeitet und hab aus den technischen Begrenzungen, die dieses Programm bietet heraus ein mehrschichtiges Editionsverfahren für mich entwickelt zur Edition einer frühneuhochdeutschen Gebrauchshandschrift, wo ich eben in Schichten vorgegangen bin. Ich habe mit einer sehr handschriftennahen Transliteration begonnen und habe dann Schicht um Schicht Informationen abgetragen bis hin zu einer diplomatischen Lesefassung, die dann am Ende stand. **I: Und alles mit Word?** B: Ja, das habe ich mit Word gemacht. Das war..., ja, man musste da mit sehr vielen Tricks arbeiten, weil Word eben seine Grenzen hat. Wenn also Informationen, die direkt hineinkopiert – codiert – werden in die Basistransliteration, die können sich dann bei analytischen Verfahren als sehr störend herausstellen. Die muss man dann für gewisse Abläufe dann vorübergehend herauslöschen oder wegblenden. Und so bin ich dann darauf gekommen, dass ich erkannt habe, dass für gewisse Perspektiven auf den Überlieferungszeugen von verschiedenen Disziplinen her verschiedene Formationsgehalte erforderlich sind. Der Paleograph will möglichst viel Informationen über die handschriftliche Oberfläche haben und der Literaturwissenschaftler will aber möglichst nicht mehr damit belastet werden. Er möchte den Textsinn erfassen, möglichst abgespeckt. Ihm ist egal, welche Form die Formvarianten von einzelnen Buchstaben es gibt, der möchte nur wissen, ist es sicher der Buchstabe oder gibt es da Gefahren, dass da Überlappungen mit einer anderen Buchstabenform stattfindet und deswegen ein anderer Textsinn in Betracht gezogen werden muss.

**I23-2#I: Dann müssen Sie ja dann aber Schicht für Schicht und praktisch Perspektive für Perspektive immer wieder ganz neu anfangen, oder?**

B: Nein, eben nicht. Mein Verfahren sieht vor, dass man vom maximalen Informationsgehalt schichtweise bestimmte Informationen schichtweise abträgt. Ich habe für meinen Vortrag in Frankfurt ein Handout vorbereitet. Sie haben meinen Vortrag nicht gehört und deswegen das Handout nicht bekommen. Also so schaut das aus. Diese vier Schichten habe ich dann in meinem Editionsprojekt zur Darstellung gebracht. Da habe ich mal das Faksimile, leider hier nur in schwarz-weiß, also die Überschriften sind in

Wirklichkeit rot und gewisse Farbverzerrungen dann eben diese Basistransliteration, die ich „deskriptiver Abdruck“ nenne, weil ich hier versucht habe, möglichst alles, was sprachrelevant sein kann, wiederzugeben. Sogar die Unterbrechungen im Fluss der Tinte, also zwischen Buchstaben, weil man ja nie wissen kann, bei dieser kursiven..., gotischen Kursive, ob es da nicht eine Wortgrenze ist. Also das muss man ja erst herausfinden. Und diesen Abdruck habe ich aber, diesen deskriptiven Abdruck nur für einen kleinen Ausschnitt des Gesamttextes machen können. Die Handschrift hat 380 Seiten und ich habe das für 20 Seiten durchgezogen und habe dann daran mein Auge geschult und die Regeln, die Schreibbusancen meines Schreibers zu erkunden versucht und auf der Basis dann..., also auf diesen Analyseergebnissen habe ich dann eine abgespeckte Version gemacht, die für den elektronischen Gebrauch vorgesehen ist. Die schaut schon viel besser aus. Da habe ich nämlich die Buchstabenformen weggelassen bzw. wo es notwendig war, nur mal im Anschluss an das Wort als Annotation hinzugegeben, weil es eben mitten im Wort stört und habe mich aber nach wie vor konzentriert auf die Superskripte. Also ein wesentliches Merkmal meiner Methode ist, dass die Superskripte eine besondere Beachtung erfahren, weil die beim Edieren historischer deutscher Textzeugen erfahrenermaßen große Schwierigkeiten machen mit der Deutung. Und wenn man da keine vorschnellen Urteile fällen soll, sondern das einmal offen lassen soll, was das letztlich sein soll, ob das Dehnungszeichen sind oder Umlautzeichen oder was immer. Das ist ein Tiroler Dialekt des 16. Jahrhunderts, das liegt nicht auf der Hand, wie das auszusprechen und wie das zu deuten ist. Und für eine leicht normalisierte, also normalisiert im Sinn eigentlich ist das jetzt der diplomatische Abdruck, wie es ja üblich war bzw. in gewisser Hinsicht ist es ja noch hyperdiplomatisch, also was ja dann letztlich rauskommt, ist immer noch genauer als herkömmliche diplomatische Abdrucke. **I: Das ist echt interessant.**

I23-3#B: Aber wie gesagt, ich beschäftige mich zur Zeit gerade mit XML und versuche das auch zu lernen, obwohl das ist irgendwie für jemanden, der an Word geschult ist, ist das unglaublich schwierig, kompliziert. Und ich denke mir, das lässt sich mit XML alles in einer Version weitgehend machen und wäre auch für die Auswertungen dann viel besser und zuverlässiger. Bei mir ist nämlich das Problem, ist zwar schon von der Theorie her so gedacht, erst wenn diese Version ganz fertig ist, macht man weiter und speckt man ab und arbeitet an dieser Version fertig. Aber was ist, wenn ich hinterher einmal drauf komme, dass da ein Fehler ist, dann muss ich hier den Fehler ausbessern und hier und hier und die Konsequenzen jeweils berücksichtigen. Und da liegt dann wieder Fehlerpotential, das ich schwer ertragen kann, wenn ich gern perfekte

Arbeiten liefern möchte. Und da leuchtet mir schon ein, dass ich mit XML einfach im Vorteil wäre. **I: Da könnte man dann effizienter berichtigen in so einem Fall, denken Sie?** B: Ja sicher, da könnte ich meinen Datenhaufen besser strukturiert verwalten und Informationen, wenn ich sie grade haben möchte, sind sie schnell wieder da und wenn ich sie mal nicht brauche, kann ich sie ausblenden. Obwohl, also mein Kollege S, der auch mit war in Frankfurt, der Experte ist auf diesem Gebiet und der auch mein Mentor ist und der mir auch versucht, das beizubringen, der hat mir schon gesagt, das was ich da will ist auch für XML eine Herausforderung. **I: Ja auf jeden Fall. Aber...** B: Es ist nicht einfach mit dem Datensatz zu arbeiten. Weil dann Analysefragen zu stellen, da muss man dann alles Mögliche im Kopf haben, was man jeweils weglassen möchte oder muss, um die richtigen Ergebnisse rauszubekommen.

**I23-4#I: Ja, das stimmt. Mit welchen Erwartungen sind Sie dann genau zu diesem Workshop gefahren, wenn das ihr Hintergrund praktisch ist dazu. Was haben Sie sich erwartet?** B: Ja, ich bin noch nicht fertig mit diesem Editionsprojekt. Die eine Handschrift mit den 380 Seiten, die ist fertig ediert, die liegt elektronisch vor als graphetisch reduzierte Basistransliteration und eben gedruckt als Lesetext. Derselbe Schreiber bzw. Autor hat noch mehrere Gebrauchsschriften verfasst, die im Umfang locker noch einmal das ausmachen, was schon ediert ist und der zweite Teil der Edition ist noch nicht fertig. Eben aus dem Grund, weil das Ganze so mühsam und komplex ist. Und weil ich in der Zwischenzeit auch viele andere Forschungsaufgaben gehabt habe, die ebenso faszinierend waren... Und ich hab mir eben gedacht, es ist nicht gut – also wann ist das erschienen? ... 2003 habe ich die Edition rausgebracht – und jetzt sind eben schon wieder einige Jahre ins Land gezogen. Man kann eben nicht mit der alten Methode weitermachen, wenn man inzwischen erkannt hat, dass es Besseres gibt. Also ich möchte bei dem zweiten Teil der Edition jetzt unbedingt umstellen auf XML und dann nachträglich das Material auch noch in XML überführen bzw. gleichzeitig die Transliterationsregeln ja möglichst gleichhalten möchte oder muss. Ja, das ist sozusagen jetzt der Umstieg gleichzeitig, ein technischer Umstieg. **I: Ja. Und da haben Sie gedacht, TextGrid könnte etwas sein, womit Sie arbeiten können oder was war ihre Erwartung?** B: Ja, ja, naja. Bei mir ist es so: Die Texte, die ich da bearbeite, sind als Rohtransliterationen in WinWord schon vorhanden, die müsste ich nicht neu eingeben, aber man könnte sie ja importieren. Und die weiteren, die verfeinerten Annotationen, habe ich mir gedacht, könnte man eventuell mit Hilfe von TextGrid noch einfügen. Aber so weit ist TextGrid noch nicht, wie ich das verstanden habe in Frankfurt, ich werde wahrscheinlich nicht auf TextGrid warten können. Aber ich werde es

wohl in der Weise machen. Habe allerdings... ja es ist nichts vertan, was ich bisher gemacht habe, das ist immer das Tröstliche. Aber Prof. G hat uns ja bei einer Tagung vorheriges Jahr verraten, dass sein Projekt mit den mittelhochdeutschen Texten, das digitale mittelhochdeutsche Textarchiv, dass die das auch so machen. Sie transliterieren zunächst in Word und transformieren das dann in XML und bearbeiten es dann dort nach – möglichst nicht mehr im Quellcode, weil es dann ja dermaßen kompliziert wird. Ja das ist meine Hauptbefürchtung, dass im XML, wo man keine WYSIWYG-Funktion hat, dass man dann die Übersicht verliert im Daten... Das ist, glaube ich, die größte Hürde beim Umstieg von Word auf XML und da..., soweit ich über TextGrid informiert bin, wird daran gearbeitet, das dem User abzunehmen, dass er da eine schöne Oberfläche hat, wie er sie gewohnt ist, und dass im Hintergrund XML codiert wird.

**I23-5#I: Meinen Sie mit "Übersicht verlieren", dass man so tief in den Code einsteigen muss, also so tief in die spitzen Klammer praktisch gehen muss, dass man den Überblick verliert? Oder was meinen Sie genau mit Überblick?** B: Ja, meine Art zu transliterieren..., also die Texte, die ich bisher in TextGrid gesehen habe, Goethe oder so oder auch in Frankfurt bei dem Workshop, sind ja ganze Wörter in Betracht gezogen worden. Dann bei diesem Verlinkungstool, da ist es um ganze Wörter gegangen. Bei meiner Transliterationsweise bzw. die wird ja hier in G auch von M angewendet oder auch in diversen Diplomarbeiten wird sie bereits zur Anwendung gebracht, da muss man schon sehr viel weiter reingehen. Ich könnte Ihnen da zeigen ein kleines Beispiel, wie kompliziert, wie komplex sowas dann wird. Das ist ein Mini-Auszug von zwei Wörtern aus H, aus der Edition, die M gemacht hat. Da schaut der Quellcode so aus dafür, wo die Superskripte extra transliteriert sind, die sind nicht also mit dem Basisgraph im Verbund, sondern wir transliterieren sie nebeneinander, also separat in A und das Superskript dazu und dann wird natürlich die Verbindung hergestellt. Also man braucht drei Zeilen, um so einen Compound-Graph darzustellen in XML. Und wenn man da drinnen noch irgendwo ein Spatium anmerken möchte, muss man die Stelle schon sehr genau suchen, wo das einzufügen ist. Und davor habe ich Angst, dass man dann erst recht Fehler macht, weil einfach schon der Code so kompliziert ist.

**I23-6#I: Dann wäre es für Sie ein Mehrwert, wenn da Schemata vorhanden wären, die praktisch eine Vorlage für solche Fälle geben würden, die man dann nur noch modifizieren müsste im Detail, oder?** B: Ja, wobei das Schema eigentlich schon existiert, in dem diese H-Edition bereits in XML vorhanden ist. Da hat ja Herr S maßgeblich dran mitgearbeitet, da wird gerade eine „Augenfassung“, also M und Herr S nennen das „Augenfassung“, wird gerade für die

Web-Publikation vorbereitet, wird demnächst öffentlich zugänglich sein, wo eben eine Transliteration nicht so abstrakt, wo versucht wird, eine Handschrift ganz genau ikonisch wiederzugeben, indem versucht wird, die Superskripte auch zur Darstellung zu bringen mit typographischen Mitteln. Die arbeiten dann mit Unicode, haben wirklich für alles eine Lösung gefunden. Da kann man dann auf dem Bildschirm in zwei Spalten nebeneinander ein Bild der Handschrift und die genaue Transliteration sehen und muss nicht daneben eine Transliterationstabelle haben, die einem sagt, was bedeutet dieses Superskript 2 auf dem Y. Da könnte man die Pünktchen direkt sehen. Und insofern gibt es so ein Schema schon, weil das, was ich hier als deskriptiven Abdruck habe, ist im Grunde nichts anderes. Es ist nur ein Schritt, dass dann durch entsprechende typografische Zeichen darzustellen, insofern man die erschaffen kann oder sonst wie verfügbar hat.

**I23-7#I: Sie sagten eben, das würde einem dann durch so ein Programm abgenommen werden können, also dieses Tief-Einsteigen in den Code. Wäre also so ein jetzt vorhandenes Schema schon ein Beispiel dafür, dass also mehr in diese Richtung angeboten würde, von einem solchen Programm? Wäre das dann der Fortschritt, den Sie darin sehen? Oder wie haben Sie das genau gemeint, dass dem Nutzer dann etwas abgenommen wird?** B: Naja, sicher muss der Editor selbst wissen, wie und wie tief er auszeichnen möchte, das schon. Aber, wenn man sich einmal entschlossen hat, Basisgraph und Superskript getrennt voneinander darzustellen, dann hat man das ein für alle mal. Ich meine dann hat man seine Entität und kann die übertragen auf andere Fälle. Also, da bleibt dann das Grundgerüst der Elemente und Attribute und so, das bleibt einmal – denk ich mal – bestehen, das ist relativ stabil. Und ja, wie man es dann befüllt. Also es ist... Was ich mir nicht vorstellen kann, dass es jemals verbindliche Codes geben wird, für alle Buchstabenvarianten, die es quer durch die Jahrhunderte gibt, vom Althochdeutschen bis in die Gegenwart in handgeschriebenen alphabetischen Systemen. Das ist mehr oder weniger undenkbar. Wir in G sind ja..., wir spezialisieren uns ja auf noch feinere Details als nur auf der Buchstabenebene mit den Superskripten. Wir haben ja auch ein Projekt laufen gehabt über die Schrift, über die Erforschung der Individualität von Schreiberhänden. Also wir schauen sogar noch auf Details, die noch charakteristisch sind für einzelne Schreiberpersönlichkeiten. Und da muss man dann unter Umständen noch tiefer reingehen bei der Codierung.

**I23-8#I: Ja, Sie hatten das nach dem Workshop erwähnt, dass es da bereits ein Werkzeug gibt, so ähnlich wie den Text-Bild-Link-Editor, der da ganz genau auf Abstände, z. B. vom**

**Punkt zum Buchstaben eingeht?** B: Ja auch das kann ich Ihnen an dieser Publikation zeigen, von der Sie einen Sonderdruck haben können, wenn Sie möchten. Ja das sieht so aus, das Tool. Das hat eine gewisse Ähnlichkeit mit dem, was TextGrid hier bietet. Wo Sie eben in der oberen Hälfte des Bildschirms die Abbildung der Handschrift einblenden, unten haben Sie den Text, den wir auch zuerst mit Word transliteriert haben und der importiert wurde, aber eben in XML umgewandelt ist. Und wir verlinken jetzt nicht einzelne Wörter, also nicht ganze Wörter, sondern einzelne Buchstaben, jedes einzelne Schriftsymbol wird mit der entsprechenden Transliteration verlinkt und wir können das dann auswerten. Darf ich weiter nach hinten blättern? Was wir dann daraus gemacht haben: Wir werfen dann z.B... Wir suchen dann einzelne Wörter oder auch Buchstabenverbindungen und lassen die dann auswerfen. Und wenn man die dann nebeneinander stellt, kann man... Die Abbildung ist sehr klein, die wird es nicht zeigen, aber wir haben dann Schriftproben aus vier verdächtigen Bereichen in der gesamten Handschrift auf die Weise nebeneinander gestellt und konnten feststellen, dass die Handhabung des i-Punkts bei verschiedenen Schreiberpersönlichkeiten deutlich abweicht – z. B. wo der i-Punkt liegt, die Position im Verhältnis zum Basisgraph i, oder ob überhaupt ein i-Punkt vorhanden ist oder nicht, kann schon aussagekräftig sein für einen Schreiber. Oder auch die Form, wie jeder einzelne Buchstabe geformt ist und mit seinen Nachbarbuchstaben gemeinsam ein Ensemble bildet. **I: Kann man das auch wirklich berechnen oder muss letztlich doch mit Augenmaß daran gehen, praktisch?** B: Ja, also wir haben das auf zweierlei Weisen gemacht. Erstens ist uns immer wichtig, dass das auch für den Menschen noch erkennbar ist. Wir wollten das nicht der Maschine überlassen, in einer Blackbox was berechnen lassen. Also wir haben das auf unsere Weise für uns sichtbar gemacht. Also wenn man das entsprechend aufblendet, groß aufzoomt und sich da rein vertieft, kann man das deutlich erkennen, dass da ein Unterschied ist zwischen A und B, aber nicht zwischen B und C. Aber andererseits werden dann schon vom Computer im Hintergrund Werte erhoben und man kann das auch mathematisch-algorithmisch beweisen, dass das so ist, dass da wirklich, wo die Position ist, die Koordinaten des i-Punkts... Das können wir nur dadurch machen, dass wir den i-Punkt wirklich getrennt codiert haben. Denn der i-Punkt wird auch hier in dieser Bild-Text-Verlinkung separat verlinkt. Und nur deswegen ist es möglich, die Koordinaten zueinander in Beziehung zu setzen.

**I23-9#I: Ah, interessant. Das bedeutet ja, dass man auf die Art und Weise auch anders forschen kann? Also, dass man neue wissenschaftliche Erkenntnisse erlangen kann.** B: Selbstverständlich, ja. **I: Was sehen Sie noch für Möglichkeiten neue wissenschaftliche**

**Erkenntnisse zu erlangen durch digital unterstütztes Forschen?** B: Ja die, dass ist alles schon ein alter Hut heutzutage, davon spricht man schon seit 10 oder 20 Jahren, aber die Herstellung von Wortindizes, von Wörterbüchern, all das wird um einiges zuverlässiger und einfacher, wenn das Material erstmal in dieser aufwendigen Weise hergestellt ist. Wobei das schon klar ist, dass die Herstellung des Materials, des Datenmaterials sehr viel mühsamer ist als das früher mal war. Ja, das kann man auch nicht sagen, früher hat man sich technisch gequält bis man das typographisch erfasst hatte. Und wenn was falsch war, musste man die ganze Seite neu tippen. Aber es ist so, mit den Möglichkeiten steigt auch das Bedürfnis, verfeinert zu transliterieren, und das ist wieder sehr viel zeitaufwendiger als man es bisher gemacht hatte, als man nur diplomatisch vorgegangen ist, von vornherein. Aber ich denke schon, dass das ein großer Vorteil sein könnte, die Auswertungsmöglichkeiten und auch die Zuverlässigkeit, also was einmal erfasst ist, kann man dann wirklich statistisch bemessen und nicht mehr nur aus dem Bauch heraus beurteilen, denn da passieren grobe Fehler. Auch dem guten Philologen des 19. Jahrhunderts sind da Fehlurteile passiert. Ich habe so was einmal im Detail nachgelesen, dass einer eben diese Hände untersucht hat, die wir jetzt nochmal genau unter die Lupe genommen haben, und da statistische Urteile abgegeben hat, die nicht Stand halten. Weil man... weil, das Augen ist eben nicht objektiv. Es will eben das sehen, was man sich im Hirn vorstellt. **I: Und da könnte man praktisch maschinell eine andere Ebene dagegenhalten, die das eventuell widerlegen kann oder bestätigen?** B: Ja, und zwar, es ist dann eben... Der Nachweis ist ja sehr viel einfacher zu führen, eben per Knopfdruck sozusagen.

**I23-10#I: Vor dem Hintergrund all dieser Möglichkeiten und dem, was Sie sich vielleicht vorgestellt haben, was haben Sie denn für einen Gesamteindruck, von dem, was TextGrid jetzt bietet und bieten soll? Also wurden ihre Erwartungen erfüllt, mit denen Sie an den Workshop herangegangen sind?** B: Naja, der Workshop war zu kurz, um alles kennenzulernen, was TextGrid bisher leistet. Das ist klar. Wir sind ja... Ich habe dann im Internet nachgeschaut. Dieses Tutorial, das es da schon gibt, auf der Homepage von TextGrid, da haben wir praktisch die ersten zwei Kapitel erst abgearbeitet, indem wir gelernt haben, wie man einsteigt, wie man ein Projekt eröffnet, wie man Objekte importiert. Ja und das Verlinkungstool, das haben wir dann kennengelernt. Aber die Texteingabe ist noch nicht fertig, die gibt es noch nicht. Und das wäre das Tool gewesen, was mich persönlich am meisten interessiert hätte. Weil ich eben denke, über kurz oder lang wird man vielleicht dann den Umweg über WinWord nicht mehr gehen, wenn es einfachere Editionsarbeiten gibt, die man direkt erledigen könnte mit einer... **I: Mit**

**Texteingabe meinen Sie den XML-Editor?** B: Ja, dass man mit dem Editor die Texteingabe gleich vollziehen könnte, sofern es nur um Buchstabentreue geht und dann wäre eben dann schon... da sind dann schon die nächsten Wünsche, die man hätte, dass vielleicht dann auch etwas vorgesehen wäre für die Eingabe von Superskripten, nicht?

I23-11#Da müsste man dann entweder selber was anpassen können oder es müsste die Forschungsgemeinschaft insgesamt, die inzwischen den Wunsch hegen, dass man das machen kann. Da habe ich noch keine konkrete Vorstellung, wie TextGrid konstruiert sein wird? Ob dann der User selber auch was verändern kann oder noch was hinzufügen kann oder ob man dann jeweils die TextGrid-Gemeinschaft bitten muss oder ein Projekt irgendwie einrichten muss, damit das auch noch geschehen kann. **I: Also in einem Dokument, das bereits eingegeben wurde**

**nachträglich etwas zu verändern oder wie meinen Sie das?** B: Ja eventuell auch das, weil ja die Ansicht in TextGrid wäre ja eine „What you see is what you get“-Ansicht. Dort könnte ich mir vorstellen, dass man nachträglich die Superskripte noch hinzufügt. Aber in welcher Codierung das geschehen kann, das müsste man noch diskutieren. Ob die dann ikonisch sein soll, dass man das sieht, was auch in der Handschrift ist, nur in einer standardisierten Form, oder ob man da abstrakte Codes einfügt dafür, so wie ich es bisher gemacht habe. Und da erhebt sich dann auch die Frage: Inwiefern sind meine Codes auch für andere Benutzer relevant? Sollte man sich dann nicht vielleicht besser auf Ziffern, auf Codes einigen, die für die gesamte Gemeinschaft gelten? Und da beißt sich irgendwo die Katze in den Schwanz, weil ich eben meine: Es gibt viel mehr Buchstabenvarianten, die man auseinander halten könnte, als man überhaupt Codes entwerfen kann, die man dann vernünftig auseinander halten kann. **I: Ja, das wäre dann die**

**Frage. Einerseits müsste man ja dann etwas anbieten, was jeder relativ einfach nutzen kann, um diese Zusatzebene der Superskription, Superskripte zu erstellen, aber auch die Möglichkeit, dass jeder seine eigene Methode anwendet, also eventuell das selber gestalten könnte. Dann müsste es ja eigentlich beides geben, oder was würden Sie sagen?** B: Ja, ich

meine, es spräche ja nichts dagegen, dass jeder seine eigene Codierungsweise verwendet, die wäre ja durch einen Transliterationsschlüssel festgelegt, festgehalten und man könnte die, falls es einmal Standards gibt, dann eins zu eins übertragen in ein anderes Codierungssystem. Aber dazu wäre es praktisch, wenn der User in TextGrid sich selber so ein Set an Codes zusammenstellen könnte, dass er jetzt verwenden will für diesen Editionsfall und wenn man das dann schnell zur Hand hätte. Ich habe einmal über TextGrid... Also ich habe schon öfter davon gehört, auch auf Tagungen der Arbeitsgemeinschaft, z. B. 2009 in Berlin war das, denke ich. Ja. Und da ist bei mir



der Eindruck geweckt worden, dass genau das möglich sein soll. Dass da irgend so ein Pop-Up-Fenster aufgeht mit einer Auswahl von Codes und dass ich daraus auswählen kann. Und wenn das jetzt Tausende von Codes sind, ist das mühsam, mir bei jedem Wort, das ich transliterieren möchte, mir die Zeichen zusammen zu suchen. Aber wenn ich mir vorweg das zusammenstellen könnte, was ich brauche, denn mein Schriftsystem hat vielleicht 100 oder 200 Codes und davon brauche ich nur die Komplizierten – den Buchstaben kann man ja über die Tastatur eingeben – dann wäre das ein Werkzeug, mit dem man schnell arbeiten könnte. Es geht schon auch um Geschwindigkeit bei der ganzen Geschichte. Bei meiner Transliterationsweise in Word musste ich die Codes alle im Kopf haben bzw. vorher eine Tabelle anfertigen und dort halt so lange nachschauen, bis ich sie wirklich alle auswendig kann. Wenn ich ein Auswahlfenster hätte, wäre das vielleicht sehr hilfreich. Ich weiß nicht, müsste man ausprobieren, aber könnte ich mir vorstellen, dass das eine Erleichterung wäre. **I: Haben Sie denn mit dem XML-Editor in TextGrid noch gar nicht richtig arbeiten können – bisher praktisch ja nur reingeschaut im Workshop?** B: Im Workshop haben wir ja einen fertigen Text importiert. War das da ja dieser Goethe-Text..., aber man konnte reinschauen. Das habe ich nicht ausprobiert, ob man da noch was hinzufügen kann. Aber es ist ja dann gesagt worden, dass dieses Tool noch nicht funktioniert. **I: Ja das ist noch nicht fertig.** B: Deshalb bin ich der Sache nicht nachgegangen, leider.

**I23-12#I: Gab es denn Funktionen, die für Sie völlig neu waren bei dem Workshop?** B: Völlig neu? Nein, prinzipiell nicht. Ich meine, wie man es dann macht, das ist eine andere Sache, weil, es ist ganz klar, dass man Projekte anlegen muss, dass man dort irgendwie ein Dateiverzeichnis braucht, wo die Objekte dann einzeln abgelegt werden und dass man Bearbeiter mit verschiedenen Zugriffsrechten definieren muss und so. Das ist eigentlich klar. **I: Das ist jetzt ja auch keine spezifisch editorische Funktionalität.**

**I23-13#B:** Neu wäre das mit der Verlinkung gewesen, wobei mir nicht klar geworden ist beim Workshop, was TextGrid damit im Sinn hat – also wofür das dienen soll. Ich könnte mir jetzt im Nachhinein vorstellen, dass das irgendwie mit dem Lexikon zutun hat, dass man dann die Belegstellen, Parallelbelege innerhalb des Textes leichter findet, dass man die dann jeweils mit dem Bild vergleichen kann. Das finde ich praktisch. Irgendwie freut es mich, dass TextGrid auch so ein Tool entwickelt. Aber ich glaube, dass TextGrid noch nicht die Möglichkeiten, die damit verbunden sind für die Forschung, ganz zu Ende gedacht hat. Es ist ja oft so, dass ein neues Tool entsteht und die Kreativität damit erst angestoßen wird: Was könnte ich damit jetzt alles machen?

Und dass man dann eben bis rein in die Schreiberhändedifferenzierung gehen kann, ist glaube ich, ist von dem Team noch nicht angedacht, weil es ja hauptsächlich um editorische Aufgaben geht, aber sogar das würde eine Revolutionierung erfahren.

**I23-14#I: Außer den Funktionalitäten, die wir schon angesprochen haben. Gibt es Funktionen, die Ihnen noch fehlen, bei denen Sie sagen würden: Das müsste unbedingt angeboten werden in dem Programm.**

B: Ja, es ist ja schon in Aussicht gestellt von TextGrid, dass man den Text, wenn man ihn eingegeben hat, natürlich auch irgendwie wieder rausbekommen soll. Also, dass er dann in eine Druckausgabe umgewandelt wird, das braucht man dann sicher. Aber das ist ja geplant. Und eben die Möglichkeit, ein Lexikon mit zu verlinken, finde ich auch ganz großartig. Das ist für die Forschung sicher eine ganz wesentliche Funktion – nämlich auch für die Sprachwissenschaft... Dieses Projekt würde ja erstmals die Literatur- mit der Sprachwissenschaft wieder fester verbinden. Das Problem bisher war ja, dass jeder seine eigenen Editionen machen muss, um seine individuellen Analysebedürfnisse zu befriedigen. Nein, sonst fällt mir da momentan nichts ein, was da noch dazu kommen müsste.

**I23-15#I: Wie sind Sie eigentlich mit dem Programm zurechtgekommen? Der Workshop war ja relativ stark geführt, aber gab es da trotzdem Stellen, an denen es gehakt hat, an denen Sie die Benutzerfreundlichkeit problematisch fanden?**

B: Problematisch war, dass es da ein paar technische Pannen gegeben hat, aber da kann man nichts dagegen machen, das ist halt so. Das ist ein bisschen irritierend für den, der zum ersten Mal davor sitzt. Wenn er jetzt eine Anweisung genau befolgt und es geschieht das nicht, was in Aussicht gestellt wurde, dann weiß man nicht: Ist man selber Schuld oder was ist los? Das ist sicher nicht gut, aber ich wüsste nicht, wie man das abstellen kann, das ist halt so! Das ist ja auch ein Lernprozess für das TextGrid-Team gewesen. Man musste das auf fremde Computer installieren und irgendwie zur Präsentation bringen und da kann immer was passieren in dieser Weise. **I: Ja das sind eben solche Ausfälle, die kommen hin und wieder vor. Beim nächsten Workshop war das Problem erledigt, dafür gab es wieder andere. Das ist aber auch in der Phase der Entwicklung eben auch unvermeidlich, aber schon normal, dass das vorkommt. Aber ich meine jetzt eher Probleme, die praktisch von der Konzeption her bzw. der Benutzbarkeit, wie sie langfristig bleiben soll, vielleicht herrühren. Dass Sie sagen, an der und der Stelle, das ist nicht transparent, da weiß man nicht, was man tun soll?**

B: Ja, da fällt mir nur eins ein, das habe ich Ihnen aber im Anschluss an den Workshop bereits gesagt, dass eben die Oberflächengestaltung, die Farbgestaltung so war, dass man die Eingabefelder nicht gleich als solche erkannt hat. Also

da, wo Objektname und eine Beschreibung erforderlich war, da hat man nicht gewusst: Wo soll ich das hinschreiben? Weil sich das farblich auf diesen Bildschirmen in dem Raum dort kaum abgehoben hat. Wenn man genauer schaut, würde man es dann erkennen oder wenn einen jemanden darauf hinweist. Dann merkt man sich es eh gleich. Also das war nicht selbstredend, aber sonst ist da nichts dabei gewesen, was man nicht lernen könnte, wenn man das Handbuch gründlich liest oder wenn man es eben von einer Person, das halte ich immer noch für das Beste, wenn man es von einer Person erklärt bekommt. Was ich übrigens gut fand, war, dass die Zahl der Betreuer bei diesem Workshop sehr hoch war. Ich habe mich am Anfang etwas gewundert, weil – glaube ich – das Verhältnis von Benutzer zu Betreuern ca. 2:1 war, aber das hat ja das Ganze dann gemildert. Als da diese technischen Pannen waren, ist da sofort jemand zur Hand gewesen, der dann gesagt hat: „Moment, jetzt einfach Ruhe bewahren. Es kann nichts passieren. Es wird gleich wieder weitergehen.“ Das ist sehr hilfreich, das zeigt mir, dass Einschulung in Kleingruppen stattfinden sollte wahrscheinlich. **I: Ja, das ist schon besser. Gerade wenn man den Workshop vielleicht auch mal so konzipiert, dass mehr probiert wird, also dass es nicht so stark geführt wird. Dann ist es erst recht notwendig. Und das wird auch mal der Fall sein, wenn es schon mehr gibt zum Ausprobieren.**

**I23-16#Aber noch ein Punkt: Sie haben jetzt sehr viele eigene Ideen, was digitale Editionen angeht bzw. eigene Umsetzung, schon genannt. Inwiefern ist es Ihnen denn wichtig, dass so ein System individualisierbar ist, also anpassbar an das eigene Arbeiten, an die eigenen Arbeitsweisen?** B: Naja, wenn ich meinen Fall betrachte, der doch kompliziertere Bedürfnisse hat, dann ist es aus meiner Sicht schon notwendig, dass man das gut..., dass es flexibel ist zur Erweiterung. Und Anpassung ist natürlich zum Großteil was für die Bequemlichkeit, aber das wäre in meinem Fall dann auch eine große Hilfe, wenn es nicht ein starres System wäre, sondern wenn ich mir das Tool so zurecht stutzen könnte, wie es für mich gerade nötig ist. Denn so ein Editionsprojekt, wenn es nicht um kleine Texte geht, ist ja meistens eine Sache von vielen Monaten. Und dann ist es schon gut, wenn man sich den Arbeitsplatz so einrichten kann, dass man eine zeitlang sehr gut damit leben kann. Und es ist immer..., mir ist klar, dass Editionsprojekte jeweils ein Eigenleben haben und dass jedes Mal andere Bedürfnisse auftreten können. Und ich glaube schon, dass es für Texten der älteren deutschen Literatur schon wünschenswert wäre, dass da sehr viel Flexibilität ist.

**I23-17#I: Und das Ganze, ohne dass Sie, sagen wir, den technischen Hintergrund bzw. Programmierkenntnisse hätten, um so etwas selber umzustellen. Das müsste ja dann aus**

**Nutzersicht auch dann funktionieren, ohne dass man Informatiker sein muss, praktisch? B:**

Ja, das wäre natürlich ein Schlaraffenland. Ja, ich weiß nicht, inwieweit sich das verwirklichen lässt, dass der User überhaupt keine Kenntnisse mehr haben müsste? Also ich habe momentan das Gefühl, wo ich TextGrid noch nicht habe und diese bequeme Oberfläche, die mir alles Technische vom Leib hält, da habe ich schon das Gefühl, wenn ich meinen Word-codierten Text jetzt dem Herrn S übergebe und der wandelt den mir mit einer speziellen Transformationsgrammatik um in XML, dann ist das nicht mehr mein Text. Ich hätte Sorge, ob ich dann meine Informationen, die ich darein codiert habe, wieder erkenne und ob ich sie wieder finden würde. Und da ist auch das Programmieren von Anfragen und Suchroutinen dann sehr kompliziert. Also zum jetzigen Zeitpunkt, glaube ich, ist es unvermeidlich, dass der Editor, der sich damit überhaupt befassen möchte, dass der XML auch selber bis zu einem gewissen Punkt können sollte, zumindest passiv beherrschen sollte. Weil man eben... Also z. B. das, was ich Ihnen da eben gezeigt habe, dieses Tool mit der Verlinkung, Bild-Verlinkung, das macht für uns die J Research, das ist eine Forschungsgemeinschaft des Landes S, die nichts mit der Uni zu tun hat, mit denen haben wir kooperiert und die haben für uns dieses Tool entwickelt. Und die sind die Einzigen zum gegenwärtigen Zeitpunkt, die uns alle Belege eines Wortes raussuchen können. Wir haben bei der Verlinkung mitgeholfen, haben zwei Mitarbeiter von uns das gemacht, dieses Tagging. Aber wir können nur sagen, wir hätten gerne diesen Buchstaben von diesen Seiten rausgezogen, aber wir können es selber nicht machen. Und das halte ich nicht für gut. Ein Editor soll mit seinem Material gut manövrieren können. Ja, die Abhängigkeit, die könnte ich nicht ertragen, weil mich das einschränken würde, bei meinen Forschungswünschen. Weil man muss als Editor, also ich sehe das halt so, ich habe das ja so gemacht als ich mit Word gearbeitet habe, ich muss immer zwischendurch einmal die Möglichkeit haben, mein Material schon einmal vorzusortieren oder mal Probeanalysen zu machen, um zu sehen, ob sich das lohnt, was ich da jetzt gerade mache. Ich würde das nicht für 380 Seiten durchziehen, wenn ich nicht erkennen könnte, dass das einen Nutzen bringt. **I: Ja und das gibt man dann nicht gerne aus der Hand und lässt es einfach umwandeln.**

B: Ja, nicht, dass ich Sorge hätte, dass dabei technisch Unfug passiert – das weniger. Aber, dass ich selber nicht mehr damit umgehen könnte, dass ich das nicht mehr völlig in der Hand habe. Wenn ich jetzt zählen möchte: Wieviel Prozent aller i-Belege haben einen i-Punkt oder nicht? Wenn ich dazu erst einen Antrag stellen muss an jemanden, der das für mich dann auszählt oder auswirft, mir eine Liste macht. Die Freiheit hätte ich gern, dass ich den Text technisch völlig in meiner Gewalt habe. Ich meine, wenn ich ihn dann aus der Hand

gebe, können das andere auch, aber dann muss man das Datenpaket so vorbereiten, dass es eben jeder benutzen kann. Dann braucht man dann den Transliterationsschlüssel dazu und gewisse Informationen über die Transliterationsregeln, die der ganzen Sache zugrunde liegen, die ganze Methode, die Philosophie, die dahinter steht. Dann kann ein anderer User auch damit umgehen.

**I23-18#I: Ja, welche Bedeutung messen Sie dann Kooperations- und Kollaborationsmöglichkeiten zu, die über so eine Infrastruktur, die ja durch TextGrid auch geboten werden soll, ermöglicht werden? Welche Rolle spielt dieser Aspekt?** B: Ja Kooperationen sind mir am liebsten, wenn sie sehr eng sind, also auch räumlich, so dass man Besprechungen abhalten kann, dass man sich trifft und dass man voneinander lernen kann. Also ganz strikte Aufgabenteilung, wo der eine nicht weiß, was der andere macht oder wie er es macht, ohne jeglichen Einblick in das Arbeitsfeld des anderen, das halte ich für schwierig. Man sollte wenigstens bis zu einem gewissen Punkt bereit sein, das Arbeitsfeld des anderen auch kennenzulernen, dass man auch abschätzen kann: Was ist möglich? Was kann ich fordern, was der andere umsetzen soll und was kann ich mir überhaupt noch wünschen, was wäre umsetzbar?

**I23-19#I: Ja, mit Kollaboration kann ja auch die Möglichkeit gemeint sein, dass man zusammen an einem Dokument beispielsweise arbeitet. Was halten Sie davon?** B: Ja, TextGrid hat ja in Aussicht gestellt, dass es das auch geben soll. Das hielte ich schon für sinnvoll. Aber ich weiß noch nicht, ich habe keine konkrete Vorstellung davon, wie das funktionieren könnte. Wenn es z. B. in TextGrid einen transliterierten Text gäbe, der mich auch interessiert, der aber zu wenig tief erschlossen ist, dann könnte ich an dem Text weiterarbeiten, meine Informationen hinzufügen, aber was ist dann? Ist das eine zweite Version oder arbeite ich an der Version weiter, die darinnen ist und wird das dann durch meine Informationen angereichert? Stört das dann den anderen Urheber oder findet der das gut? Der, der dann da rein arbeitet, kann ja auch... die Qualität ist damit noch nicht gesichert. Das kann jemand sein, der das sehr genau macht und perfekt, dann ist nichts dagegen auszusetzen. Aber was ist, wenn der den Text irgendwie zerstört dadurch, dass er falsche Informationen..., oder dass er auch Änderungen am Text vornimmt. Es gibt es ja auch, dass er was am Text verbessert und in Wirklichkeit ist es schlimmer. Das kann ich mir noch nicht vorstellen, wie das funktionieren soll. Aber grundsätzlich fände ich es gut. Das wäre ein neuer Aspekt der Forschung, wenn nicht jeder sein Material bei Adam und Eva beginnend neu erstellen muss, um etwas besser zu machen, sondern wirklich da aufsetzen könnte, wo etwas schon existiert.

**I23-20#I: Eine weitere Komponente der Kooperation ist ja auch die Vernetzung von**

**Inhalten, von Ressourcen, von Daten. Also TextGrid als Vernetzung von Inhalten als Datenbank. Welche Bedeutung sehen Sie da, welche Potentiale sehen Sie da?** B: Ja also, dass TextGrid ein Art Archiv sein könnte für Texte aller Art. Ja, also sowas wünschen wir uns in G hier schon ganz innig. Das wäre unser Traum. Wir haben auch im vergangenen... nein, 2008 im Herbst eine Tagung zu dem Thema in G abgehalten, „Wege zum Text“, und uns eben mit der Frage beschäftigt, wie heutzutage der Umgang, der Zugang zu Texten ist für die Forschung – eben die Problematik mit Archiven, die keinen Einblick geben wollen oder nur eingeschränkt Einblick in Handschriften und dergleichen und auch Editionen, die bereits vergriffen sind und die man nur ganz schwer über Bibliotheken bekommen kann, die man nicht ausleihen darf oder sonst irgendwas. Und dann eben die Problematik, dass es zwar in GoogleBooks jede Menge tolle Bücher gibt, dass man sie aber nicht ansehen darf. So ein Textarchiv von zuverlässigen Transliterationen und philologisch verantworteten Editionen, das wäre natürlich ein Traum. Wenn TextGrid das auch leisten könnte, für den Unterricht oder auch für die Forschung. Das wäre sehr schön.

**I23-21#I: Was, würden Sie dann sagen, ist der größte Fortschritt bzw. das größte Potential, das durch ein System wie TextGrid geboten werden könnte. Was sehen Sie als den entscheidenden Fortschritt oder den möglichen Fortschritt?** B: Ja, was mir an TextGrid gefällt, ist die Idee, dass da so viele Komponenten zusammen wirken. Also, dass es nicht nur Archiv ist, sondern dass es interaktiv ist, indem man noch was hinzufügen kann. Dass es so gestaltet sein soll, wie ich es verstehe, dass es eben jeder Philologe benutzen kann und sich beteiligen kann, was beizusteuern zu seinem Archiv. Ich meine, dass es webbasiert ist für die Zusammenarbeit, die internationale Zusammenarbeit – großartig – und ja, dass es frei verfügbar sein soll, ist natürlich ein nicht zu unterschätzender Vorteil. Das ist glaube ich überhaupt der größte Vorteil, weil es ja oft an den Ressourcen liegt, dass man etwas nicht benutzen kann. Es gibt großartige Tools, die aber leider nicht erreichbar sind, in Zeiten wie diesen, wo überall gespart wird. Wenn es so länderübergreifend im Web verfügbar ist, glaub ich schon, dass das dann sehr fruchtbar werden kann.

**I23-22#I: Und was ist Ihrer Meinung nach das größte Manko, die größte Hürde, das größte Problem an dem Plan, an dem, was da entstehen soll?** B: Das kann ich schwer abschätzen. Dafür bin ich zu wenig vertraut mit dem Gesamtkonzept. Ich weiß, dass es eine Zusammenarbeit von vielen Unis ist. Ich habe keinen Einblick, wie gut diese Zusammenarbeit funktioniert? **I: Ich meine jetzt eher in Sachen Funktionalität bzw. inwiefern ist das umsetzbar, was Sie jetzt als**

**Fortschrittmöglichkeiten gesehen haben?** B: Ach so, ob das umsetzbar ist kann ich auch nicht abschätzen. Ich bin nicht die Technikerin. Ich denke mir, wenn das als Konzept entworfen wurde, dann wird das auch aussichtsreich sein, dass es eines Tages erreichbar ist. Der Weg dorthin ist – glaube ich – recht groß, weil das ein sehr großzügiger Plan ist – also nicht kleinräumig und irgendwie ängstlich, sondern wirklich sehr generös. **I: Was war das Problematischste, was sie im Workshop gesehen haben, an der Präsentation, aber auch an dem, was ausprobiert werden konnte? Was ist Ihnen da negativ aufgefallen?** B: Ich glaube, um da was negativ zu beurteilen, war einfach der Workshop zu kurz. Ich meine, es war eh ein Vormittag, aber weil wir lauter Neulinge waren – also ich hatte irgendwie so den Eindruck, dass alle, die da rund um den Tisch saßen, das noch nicht gekannt haben und noch nie probiert haben. Dadurch geht alles viel langsamer. Ich glaube, wir haben nicht alles kennengelernt, was TextGrid bisher schon kann. Deswegen würde ich jetzt gar nichts dazu sagen. Ich meine, negativ kann man nicht sagen, weil so kleine technische Pannen nicht in der Hand derer lagen, die den Workshop geleitet haben. **I: Gut, ok, ich bedanke mich.**
