# Supplementary material
Source: publisher site journal article supplement (https://www.degruyterbrill.com/publication/isbn/9783110463927/downloadAsset/9783110463927_Interviews.zip)
Supplement: Supplementary file 17 [file I24.pdf › Interviews/I24.pdf]

**I24-1#Interviewer: Inwiefern arbeiten Sie denn im Bereich E-Humanities bzw. inwiefern haben Sie mit dem Thema zu tun und wie würden Sie ihre Erfahrungen in dem Bereich einschätzen?** Befragte/r: Also, da muss ich Ihnen sagen: Ich bin völlig randständig. Ich habe mit dem Thema so gut wie nichts zu tun. Ich mache hier in klassischer Manier Editionen. Ich bin daran gekommen, überhaupt mich mit TextGrid zu beschäftigen, durch J, der hier eine

Zeit lang eine Professur inne hatte und sich dafür interessiert hat, das Projekt, das ich hier betreue, mit in dieses TextGrid-Programm mit hineinzunehmen. Das Thema war in den Anfängen steckend. **I: Was ist denn das genau für ein Projekt? Könnten Sie da genauer drauf eingehen?**

B: Ja, also ich habe bis 2007 eine Edition des Briefwechsels von M gemacht. Wenn ich mich hier weg bewegen darf, zeige ich sie ihnen. Das ist dabei herausgekommen und Sie sehen, das ist einfach noch in Hochform und es ist noch so gemacht, damals noch fern von J und TextGrid. Und das Folgeprojekt ist eine Edition der Werke Ms. Und die Sponsoren, die ich habe, möchten das in gleicher Weise wieder haben, sind aber durchaus nicht verbohrt. Wenn ich denen mit der Idee käme, man könnte das auch in einer Hybrid-Edition gleichzeitig in elektronischer Form machen, hätte weder der Geldgeber noch der Verlag was dagegen. Insofern bin ich da auch gar nicht abstinert oder blocke ab.

**I24-2#Es ist nur in meinem Arbeitsverfahren sehr schwer möglich gewesen, die Programmsituation, die mir J präsentieren konnte, einzubeziehen. I: Inwiefern? Was war das Problem?**

B: Weil ich ständig – Kommentierungen vor allen Dingen – umwerfe. Also ich habe da keine feste Struktur, sondern es ergibt sich aus dem Text, wie ich am Besten vorgehe. Also ich beschließe dann oft, dass ich einen Kommentarteil, den ich weiter hinten finde, doch schon lieber an den Anfang in abgeänderter Form, umformuliert, da einbringe und von hinten darauf verweise und Ergänzungen einfüge. **I: Aber das wäre doch eigentlich gerade elektronisch recht gut möglich oder digital unterstützt?**

B: Ja, ich arbeite mit Technologie. Ja, das ist klar, aber nicht mit einem TextGrid-Programm, mit dem ich – Wie hieß das? – Text-Markup, vorgegebene Textblöcke... **I: Ja.** B: Es gab da eine Kommentaranlegenheit, die in festgefügt Textblöcken zu machen war, und ich konnte nachträglich nichts mehr ändern, sondern musste – wenn – dann den ganzen Teil löschen und neu eingeben. Und da das in zwei verschiedenen, also einmal in der Datei des konstituierten Textes festgelegt wurde und in der zweiten Datei ausgeführt wurde, ließ sich das einfach nicht praktizieren. Das wäre dann gegangen, wenn mein Kommentar schon fertig gewesen wäre, dann hätte ich nachträglich diese Verknüpfungen auch noch herstellen können und schon festgefügte Texte

da eingeben können. **I: Ah, verstehe. Das sollte aber eigentlich Ziel sein, dass so was auch funktioniert in TextGrid, wahrscheinlich ist es einfach noch nicht soweit.** B: Ja, das war auch mein ständiges Nörgeln, dass ich gesagt habe, ich kann nicht das Programm erfinden. Ich brauche eins, das auf meine Arbeitsweise zugeschnitten ist bzw. in das ich nachträglich eingeben kann, was ich erst auf die mir vertraute Weise erarbeitet habe.

**I24-3#I: Mit welchen Erwartungen sind Sie dann an den Workshop herangegangen?** B: Ich wollte einfach mehr darüber wissen, weil das, was ich hier gesehen habe bzw. was an mich herangetragen wurde, mir zu mager war, ich mir aber eine elektronische Edition ausgesprochen reizvoll vorstelle, sehr vielversprechend. Das, was ich hier mühsam durch Auswertung der Sekundärliteratur, Quellen etc. in den Kommentar zusammenbastele, das kann ich mir sehr schön als Linkfolge vorstellen, dass ich als Benutzer direkt in die Quellen hineingeführt werde, soweit wie ich halt gehen will. Also ich rede jetzt vom Kommentar. Das, was im Workshop ja eigentlich nur gezeigt wurde, waren Fragen der Textkonstitution. Das fand ich eine nette Spielerei, aber nicht das, was ganz dringend... **I: Ja, also für Sie wäre der entscheidende Mehrwert mit dem Kommentar zu arbeiten?** B: Ja, natürlich ist es schön, wenn ich den Text auf dem Bildschirm habe und fahre mit meinem Cursor drüber und sehe an den neuralgischen Stellen die Textkritik in einem kleinen Fenster aufgehen, die ich hier in meiner Verfahrensweise unten ans Ende der Seite dann irgendwie bringe. Das fände ich schon schön, dass ich auch von Punkt zu Punkt gehen kann und sehen kann: Wie ist die Arbeitsweise des Autors oder des Dichters? Das finde ich ausgesprochen animierend. Aber der wirkliche Nutzen scheint mir im Kommentar zu liegen.

**I24-4#I: Interessant. Und wie war dann ihr Gesamteindruck von dem Workshop? Sie wollten das Ganze mehr kennenlernen. Ist Ihnen da irgendwas begegnet, was sie nützlich fanden oder wie war ihr Gesamteindruck?** B: Also mein Gesamteindruck war sehr positiv, vor allem die Heranführungsweise fand ich sehr angenehm, dass nichts vorausgesetzt wurde, dass es Schritt für Schritt ging. Aber ich muss Ihnen sagen, der Hintergrund der Programmsprachen und des Programmaufbaus, den verstehe ich nicht. Also ich kenne weder XML noch HTML. Was ich brauche oder bräuchte, ist eine leicht benutzbare Oberfläche, die es mir gar nicht abverlangt, mich um den Aufbau des Ganzen zu kümmern. **I: Ja, das heißt, sie müsste, ähnlich einem Textverarbeitungsprogramm, Funktionen bieten und auch so eine Format- oder Schemavorlage, in die man das nur noch einfügen muss?** B: Ja, ohne, dass ich da groß drüber nachdenken muss, so wie ich jetzt meine normalen Wordbefehle gebe, um bestimmte Strukturen anzulegen, so müsste das auch zu machen sein.

Aber ich komme aus der editorischen Praxis. Ich habe mich wirklich um die EDV nie bemüht. Meine Probleme liegen wirklich ganz wo anders und die sind nicht gerade wenige.

**I24-5#I: Ja, das ist klar. Aber das ist ja auch Sinn der Sache, dass wir herausfinden, was Nutzer nützlich finden – also mögliche Nutzer. Gab es denn Funktionen, die für Sie völlig neu waren, also Funktionalitäten, die vorgestellt worden sind?** B: Also neu war im Grunde für mich alles. Ja und ich müsste mich wirklich sehr anstrengen, um zu kapieren, was im Einzelnen da geschehen ist. Zumal, weil ich mich falsch angemeldet hatte und dachte, J gibt meine Frage weiter bzw. gibt meine Anmeldung weiter und wenn er mir nur eine kurze Mail geschrieben hätte – „Geht nicht über mich.“ – so hatte ich keinen eigenen Rechner. Aber das ging natürlich ganz wunderbar, ich saß zwischen R und B und durfte bei beiden so ein bisschen mitmachen. **I: Und wie hat das Mitmachen funktioniert? Gab es da Stellen, an denen sie Probleme hatten oder ging das alles reibungslos, das Testen?** B: Das ging insofern reibungslos, da ja eigentlich ständig einer von Ihnen zur Verfügung stand, der sofort eingegriffen hat, wenn es irgendwo hakte. Insofern kann ich mich an Störungen gar nicht erinnern, oder an Probleme, Behinderungen. **I: Ja, wie fanden Sie die Benutzerfreundlichkeit, die Bedienbarkeit dieser Oberfläche? Waren Sie da sehr stark auf Hilfe angewiesen oder sind sie da gut mit zurecht gekommen?** B: Das kann ich gar nicht mehr auseinander nehmen, weil die Hilfe so präsent war. Wenn ich damit allein gelassen worden wäre, wüsste ich das wahrscheinlich besser zu beantworten. So wirklich sehr instruktiv aufgebaut, wie sie eingeführt haben: Schritt für Schritt. **I: Ja es war schon sehr stark geführt, insofern...** B: Aber das ist keine Kritik, das ist eher ein Lob, ja? **I: Das kommt natürlich auch drauf an, wie viel Vorwissen die Tester haben. Was kann man voraussetzen? Daher denk ich, war das richtig.**

**I24-6#Welche Bedeutung messen Sie denn der Funktion zu, dass man das TextGridLab an die eigene Arbeitsweise anpassen kann? Das hat man ja in dem Workshop auch gesehen, dass man auch verschiedene Ansichten wählen konnte, zum Beispiel...** B: Ja, das finde ich schon sehr gut, wenn da eine Auswahl zur Verfügung stünde und ich da meine etwas idiosynkratische Arbeitsweisen da entsprechend einrichten könnte.

**I24-7#I: Da Sie ja bisher vor allem mit Textverarbeitung gearbeitet haben... Hatten Sie schon mal damit zu tun, dass spezielle Tools auch für die Edition entwickelt wurden? Wurde das bei Ihnen alles mit Word gemacht oder haben sie da spezielle digitale Werkzeuge genutzt?** B: Nein, ich habe nur mit Word gearbeitet, habe mir verschiedene Hilfsebenen angelegt, Datenbanken zur Auswertung, verschiedene Sichtproblemlagen, aber

ich habe keine Versuche gemacht, mich mit anderen – TUSTEP oder irgendwas – mit anderen Verfahrensweisen zu beschäftigen.

**I24-8#I: Gut, welche Potentiale sehen Sie denn für ihre Arbeit in der digitalen Infrastruktur, die TextGrid darstellen soll. Das wurde in dem Vortrag, bevor das Lab getestet wurde, ja kurz beschrieben, um was es sich da handelt. Es handelt sich ja nicht nur um diese Oberfläche, diesen Editor selbst, sondern um ein Netzwerk praktisch. Inwiefern ist das für Sie von Bedeutung? Welches Potential sehen Sie darin?** B: Ich kann Ihnen das wieder nur inhaltlich beantworten. Ich sehe da ein sehr großes Potenzial – aber in erster Linie zum Austausch von Problemen und Erkenntnissen. Wenn ich mit viel Mühe endlich es geschafft habe, eine bestimmte Quelle zu finden, die irgendwo im 18. Jahrhundert sehr entlegen ist, dann fände ich das sehr hilfreich, wenn ich mich mit anderen darüber austauschen könnte bzw. von anderen entsprechende Tipps bekäme. Es ist immer ein etwas einsames Schaffen und Netzwerke wären nützlich. **I: Sie meinen das jetzt aber eher im Sinne von Kommunikationsnetzwerken?** B: Ja, aber es kann natürlich durchaus eine Form annehmen, dass es irgendeinen Pool gibt, in den bestimmte Informationen eingespeist werden und für den spezifischen Benutzerkreis abrufbar sind. **I: Ja, also eine Vernetzung von Inhalten, inhaltlichen Ressourcen und Daten? Was könnten Sie sich da noch vorstellen, was in dem Netzwerk liegen könnte, welche Funktionen das erfüllen könnte?** B: Also wie ich das editorische Feld sehe, ist allzu viel Kommunikation schwierig. Die artet sofort in Streitereien aus. Deshalb würde ich das wirklich auf faktischen Austausch kaprizieren. **I: Können Sie da ein bisschen genauer drauf eingehen, was zum Beispiel da ausgetauscht werden kann?** B: Z. B. bleiben wir ganz banal: Lebensdaten von Personen, die erwähnt werden in Briefen, in Werken usw., die auch wirklich sehr schwierig zu finden sind. Ich rede jetzt nicht von dem, was im internationalen biografischen Archiv zu finden ist, sondern von den vielen, die ganz am Rande stehen und mit denen man wirklich viel Mühe hat. Und dass man Entsprechendes zusammen trägt und plötzlich eine Edition aufschlägt und sieht, da steht es ja, meistens ohne Quellenangabe. Solche Art von Informationsaustausch fände ich sehr gut. Das geht dann natürlich auch über Biographisches hinaus, bis hin zu: Wer hat welche Quelle benutzt? Wann ist welches Werk in der Übersetzung zum ersten Mal erschienen? Wie verhalten sich die verschiedenen Auflagen zueinander? All das, was jeder einzelne für sich jedes Mal wieder Schritt für Schritt neu herausfinden muss, das mal in eine Datenbank, wie auch immer man das dann erarbeiten kann, zusammenzufassen. **I: Also praktisch schon Ergebnisse von editorischem Arbeiten?** B: Ergebnisse, aber auch Fragen. Dass ich mich

dahin wenden kann und fragen kann: Wer weiß, wann Hagedorn sich zum ersten Mal mit dem Täter beschäftigt hat.

**I24-9#I: Und inwiefern sehen Sie es als nützlich an, auch zu publizieren, also auch selber Daten einzustellen?** B: Das würde ich ohne weiteres tun. Da hätte ich keine Bedenken, dass..., die Heureka-Erlebnisse, die ich hier ganz alleine habe, auch mitzuteilen. **I: Also auch eine digitale Edition über dieses Netzwerk zu veröffentlichen, zum Beispiel? Sehen Sie das allgemein so, dass das eine Möglichkeit sein könnte, um so etwas zu bündeln? Also eine Publikationsplattform zu bieten?** B: Ja das fände ich sehr gut. Ich bin ja auch jetzt froh um alles, was digitalisiert vorliegt. Und warum sollte man das nicht schon gleich mit in die Planung einbeziehen, das zu tun? **I: Glauben Sie, dass das in dem Bereich editorisches Arbeiten, die meisten so sehen? Wie würden Sie das einschätzen?** B: Das glaube ich nicht. Ich weiß nicht, wie viel Sie mit Editoren zu tun haben? Wahrscheinlich in letzter Zeit sehr viel. Vielleicht kriegen sie aber auch unter denen, die sich zu Interviews bereit finden, schon eine Vorauswahl. Es ist doch ein sehr eigenbrötlerisches Volk. Ich weiß nicht, ob Sie die ganze Editio-Tagung besucht haben und ob das ihre erste war? **I: Ich war auf verschiedenen. Also, Sie sehen da schon noch eine Hürde?** B: Ja, ich sehe da eine gewaltige Hürde, obwohl ich da auch einen Generationswechsel mit großer Freude sehe. Wenn ich mir überlege, wie das vor zwanzig Jahren war, da wäre wahrscheinlich nichts möglich gewesen. Also langsam kommt da was in Gang. Aber das ist meine persönliche Erfahrung mit den Damen und Herren. Aber sie kennen ja die Streitigkeiten um die Kleistausgabe z. B., um Kafka, um Hölderlin. Das ist ja schwer zu vermitteln, was da geschieht.

**I24-10#I: Vor dem Hintergrund, welche Chancen sehen Sie für kollaboratives Arbeiten – also die Vernetzung von Arbeitsprozessen in dem Bereich – dezentral am selben Objekt arbeiten. Das ist ja in dem ein oder anderen Projekt durchaus von Nöten.** B: Wenn das Projekt gut aufgestellt ist, dann sehe ich da kein Problem. Wenn es allerdings um unterschiedliche Arbeitsverträge geht und Zukunftsplanung und Zukunftssorgen und Karrierestrategien, dann sehe ich da schon ein Problem. **I: Also Sie sehen die Probleme eher im administrativ-politischen Bereich, dass die Zusammenarbeit funktioniert?** B: Ja, die Angst, dass jemand anders ein mühsam erarbeitetes Forschungsergebnis für sich selber verwendet, die müsste man irgendwie in den Griff kriegen, dass das nicht geschieht. **I: Was würden Sie da als Lösung sehen?** B: Das kann ich Ihnen auf elektronischer Ebene nicht beantworten, wie man das kennzeichnen, auszeichnen könnte, wem was gehört. Das kann ich Ihnen nicht sagen. Ich bin mittlerweile soweit, dass es mir egal wäre. **I: Aber das wäre der**

**Punkt also, dass man den Nachweis, das Copyright in irgendeiner Weise umsetzen könnte?** B: Ja.

**I24-11#I: Inwiefern sehen Sie denn Möglichkeiten durch digital unterstütztes Arbeiten zu neuen wissenschaftlichen Erkenntnissen zu kommen?** B: Das sehe ich allerhöchstens in der Schnelligkeit. **I: Ja, dass man mehr Informationen gleichzeitig bearbeiten kann, oder...?** B: Ja, oder dass ich überhaupt schnelleren Zugriff habe auf Informationen. Also, wenn ich jetzt hier das Deutsche Wörterbuch mir jederzeit auf den Bildschirm laden kann und nicht immer drei Stockwerke runter in die Bibliothek rennen muss, um ein Stichwort nachzuschlagen, dann ist das einfach Zeitgewinn und Effektivitätsgewinn, ja? So ganz banal. Und das können Sie natürlich hochrechnen auf alles andere auch. **I: Aber im Grunde bleibt es doch dem althergebrachten wissenschaftlichen Arbeiten bzw. den Fragestellungen, wie sie auch offline gestellt wurden, vorbehalten, wissenschaftliche Erkenntnisse letztlich zu gewinnen?** B: Ja, also ich kann es mir nicht anders vorstellen. Nur es ist nur sehr viel mühsamer, wenn mir die Daten nicht zur Verfügung stehen und ich sie mir an verschiedenen Orten zusammensuchen muss – jetzt auch ganz konkret räumlich. Es geht einfach schneller und ich verliere dabei nicht den Faden; kann mehreres auf einmal abgleichen. Es geht einfach gut. Es ist enorm, ich kann es mir gar nicht mehr vorstellen, wie es vor zehn Jahren war.

**I24-12#I: Was würden Sie nach den Eindrücken, die sie bisher jetzt gesammelt haben, als größten Fortschritt oder als größtes Potential von Systemen wie TextGrid sehen?** B: Also, das, was ich eben schon sagte, dass ich in verschiedenen Staffeln immer tiefer in die Problematik eindringen kann. Wenn ich ein Kommentarproblem habe, das zunächst mal ganz simpel vorstrukturiert wird, durch eine Worterklärung oder den Aufriss des historischen Zusammenhangs und schreibe einen herkömmlichen Kommentar, dann gebe ich früher oder später irgendeine Quelle an, Sekundärliteratur oder auch die direkte Quelle, auf die es sich bezieht. Wenn ich jetzt die Möglichkeit habe, diesen Aufsatz, den der Kommentar zitiert oder auf den er rekurriert, mir gleich auf den Bildschirm zu laden und selber zu sehen, was da los ist, oder gleich direkt an die Quelle zu gehen, mir das Kapitel in Voltaires Gustav Adolph dahin zu holen und zu schauen, was schreibt er denn? Dann fände ich das großartig. **I: Also durchaus auch der Datenzugriff direkt auf die Quellen, auf die Originalquellen?** B: Ja und das ist ja dann dem Benutzer vorbehalten, wie tief er an jeder Stelle einsteigt, aber dass er das einfach immer weiter betreiben kann und auch ausfächern kann: Will ich jetzt eher in die Wortgeschichte mich weiter vertiefen oder will ich mehr über die Personen wissen, um die es da geht? **I: Haben Sie in dem Zusammenhang bei dem Vortrag sich auch mit dem**

**Wörterbuchnetz befasst, besser gesagt erinnern Sie sich noch an den Punkt?** B: Ich habe mich noch gar nicht richtig damit befasst, aber es kommt mir die Erinnerung, dass da Wörterbücher zur Verfügung stehen in großem Ausmaß. **I: Das wäre ja auch ein Aspekt...**

B: Ja, den würde ich sehr gerne nutzen. **I: Weil Sie ja auch sagen, in verschiedenen Aspekten vorgehen zu können, das wäre praktisch ein Teil davon?** B: Ja!

I24-13#Mir fällt noch was ein zur Nutzung: B hat hier mal ihren Vortrag gehalten zur Faustedition, so ähnlich wie es auch auf der Tagung noch mal kam. Was ich auch sehr schön fand, die Funktion, dass ich durch das Gleiten über die Textoberfläche die Handschrift sehen kann. **I: Ja, Sie meinen den Text-Bild-Link-Editor?** B: Ja, das war ja auch Bestandteil des Workshops, dass man da hin und her schalten kann. Und das fand ich auch eine sehr gute Sache. **I: Können Sie sich denn vorstellen, dass man über solche Funktionen auch anders forschen kann?** B: Ja, sicher. Es ist ja doch bisher so, wenn ich eine kritische oder eine historisch-kritische Edition zur Verfügung habe, dann kann ich mich darauf weitestgehend verlassen. Wenn ich jetzt interpretatorisch arbeite und möchte eine bestimmte Stelle besonders betrachten, dann würde ich mich früher oder später auf keine Edition mehr verlassen, sondern würde mir selbst die Handschrift suchen. Und wenn eine Edition mir die Handschrift zur Verfügung stellt, habe ich wieder Zeit und Raum gespart. **I: Aber es wäre dann doch wieder eine Sache der Effizienz?** B: Ja, was sonst könnte es sein? **I: Das frage ich Sie. Sie sind auf dem Gebiet die Fachfrau, deshalb...** B: Ja, also ich komme wirklich immer nur aus der Praxis. Ich kann Ihnen das nur von meiner Problemlage her sagen, nicht von der anderen Seite.

I24-14#**I: Jetzt hatten wir das größte Potential, den größten Fortschritt, den Sie sich vorstellen können. Auf der anderen Seite als Fazit im negativen Sinne: Was sehen Sie noch als das größte Problem, als die größte Schwierigkeit?** B: Also die größte Schwierigkeit für mich ist, wie gesagt, die Benutzerfreundlichkeit. Was ich mir wünschen würde, ist entweder, wie schon besprochen, eine Oberfläche, die ich mühelos angehen kann oder mit einer kleinen Einführung, also es ist nicht so, dass ich da gar nichts lernen will. **I: Sie meinen, dass Sie kein XML lernen müssen?** B: Genau, dass ich keine Programmiersprache lernen müsste, dass ich nicht, wie ich mir das bei TUSTEP angeguckt habe, mit Codierungen ohne Ende davor und dahinter arbeiten muss. Dass ich einfach normal meinen Text eingeben kann, mich auf die Probleme des Textes konzentrieren kann und nicht auf die elektronischen Hintergründe. Das andere wäre, was ich sehr gut fände, wenn es sogar noch ein Stück weiter ginge, und man ein Programm zur Verfügung hätte, in dem man schon bestehende Editionen rückversetzen könnte. **I: Also einfach auch anschließen an das Ganze**

**meinen Sie, oder wie meinen Sie das mit „rückversetzen“, ein bestehendes digitales ...** B:

Dass ich z. B. meine M Briefwechsel nachträglich in ein TextGrid-Programm einbringen könnte, oder die editorischen Arbeiten, die ich vorher gemacht habe, damit es einfach auch zur Verfügung stünde. Darum geht es ja. **I: Also, die in einem Format vorhanden sind, das**

**dann einfach nur noch angeschlossen, eingegeben werden muss in TextGrid meinen Sie?**

B: Ja, aber auch, dass man das, was TextGrid bietet an großen Vorteilen, dass man das dann auch nachträglich noch mit anschließen kann. **I: Gut ja, das...** B: Aber das weiß ich nicht, ob

das zu leisten ist? **I: Das wäre ein Kompatibilitätsproblem, dass es zunächst in dasselbe Format übertragen werden müsste und dann eben auch die Funktionen anwendbar sind, auf das, was es schon gibt.**

I24-15#B: Was die Textlage mir problematisch erscheinen lässt, ist, dass ich natürlich aufgrund der verschiedenen Standorte und Rechteinhaber nicht immer die Möglichkeit habe, die Handschriften mitzubenutzen. Weiß nicht, wie weit Sie da kommen. In den öffentlichen Archiven dürfte es dann irgendwann Absprachen geben. Aber wie das mit Privatarchiven ist, ist sehr schwierig. **I: Das ist noch ein weites Feld. Ja, das stimmt.** B: Ich hatte gerade eine

komplizierte Dichterwitwe an der Hand, aber holla. Da weiß ich nicht, ob das jemals was wird. **I: Ja, da gibt es einen eigenen Arbeitsbereich dazu im Projekt, aber wie weit das gediehen ist bzw. wie das weiter gehen wird, weiß man natürlich nicht. Ja gut, das war es schon.**
