# Supplementary material
Source: publisher site journal article supplement (https://www.degruyterbrill.com/publication/isbn/9783110463927/downloadAsset/9783110463927_Interviews.zip)
Supplement: Supplementary file 19 [file I26.pdf › Interviews/I26.pdf]

**I26-1#Interviewer: Inwiefern arbeiten Sie im Bereich eHumanities bzw. wie würden Sie ihre Erfahrungen auf dem Gebiet beschreiben und ihre Tätigkeit?**

Befragte/r: Also meine Tätigkeit ist sozusagen eine beratende. Ich bin jetzt selber nicht in irgendwelchen Editionen tätig. Ich war, ich bin noch an der Akademie der Wissenschaften in B und dort als Leiter der Informatik und dort sind auch etliche Vorhaben, die Editionen machen – ich sage mal in der Größenordnung vielleicht 20 – und die jeweils ihre eigenen Werkzeuge und Probleme haben. Und das ist sozusagen eine beratende Tätigkeit, wo man... teilweise auch eine entwickelnde Tätigkeit auf dem Gebiet der Software für digitale Edition. Ich habe... Das ist jetzt die letzte Tätigkeit gewesen, ich habe vorher im Bereich Informationswissenschaften und in anderen Zusammenhängen auch, wo auch der Kontakt mit Edition und der zugehörigen Software vorhanden war. **I: Das war auch eigentlich ihr Studium, ihre Ausbildung Informatik – Informationswissenschaft?**

B: Ich habe sozusagen zwei Leben: Ich habe zunächst ein geisteswissenschaftliches Studium Philosophie und Germanistik gehabt und habe dann auch 12 Jahre – glaube ich – etwa als Philosophieunterricht an der TH in A und bin dann quasi aus Interesse muss man sagen, aus eigener Motivation, hatte ich mich dann zunächst mit dem Computer angefreundet, habe dann Informationswissenschaft in D studiert und Informatik in H und war dann darauf auch in nicht geisteswissenschaftlichen Bezügen teilweise tätig an medizinischen Instituten, ja.

**I26-2#I: Welche Erwartungen hatten Sie dann vor diesem jetzt beschriebenen Hintergrund an TextGrid, als Sie zu dem Workshop gekommen sind?**

B: Ja, ich hatte also, wie man merken kann, schon einige Erfahrung mit Werkzeugen auf diesem Gebiet und es gibt – man kann den Namen ja sagen – ein sehr etabliertes Werkzeug in dem Bereich der Geisteswissenschaften – TUSTEP – und das auch in etlichen oder vielen Projekten eingesetzt wurde und wird. Und es ist zum anderen klar, dass das ein sicherlich sehr verdienstvolles, aber auch sehr altes Werkzeug ist und von daher war es klar, dass es einen Bedarf nach Erneuerung gibt und dass dieser Bedarf auch aus Gründen, auf die wir vielleicht nachher noch kommen, nicht ganz einfach ist. **I: Ja und wie war ihr Gesamteindruck? Inwiefern wurden ihre Erwartungen erfüllt oder auch nicht?**

B: Meine Erwartungen wurden erfüllt, in der Hinsicht, dass das schon das Konzept und der Umfang eines Tools oder Werkzeugs ist, das hier benötigt wird. Damit komme ich vielleicht doch schon zu den angedeuteten Schwierigkeiten. Ich weiß von eh und je: Es ist schwer, Werkzeuge zu ersetzen. Denn Editionen sind nicht nur, weil die Editoren konstellativ sind,

sondern einfach. sozusagen aus der Notwendigkeit der Edition, sind die langfristig an Werkzeuge gebunden. Also die werden sich nicht leicht entschließen, was neues zu nehmen, wenn die Edition schon läuft. Und auch wenn eine neue Edition angefangen wird, dann will man natürlich ein Werkzeug haben, von dem man sicher ist, dass es bis zum Schluss trägt und da ist auch eine Tendenz zu Etabliertem und Weitverbreitetem, was vielleicht gar nicht so geeignet ist – wie Word beispielsweise oder so. Und insofern ist der Entschluss zu Neuem zu gehen, und jetzt im Speziellen auf TextGrid: Es hat, denk ich, noch nicht eben in allen Bereichen den Reifegrad, dass es nun wirklich schon so ohne Weiteres in der Edition eingesetzt werden kann.

**I26-3#I: Was sehen Sie denn für Probleme als am bedeutendsten noch an?** B: Ich denke, dass – ich habe jetzt vielleicht auch keinen ganz hundertprozentigen Eindruck – aber von dem, was ich weiß, dass ich denke oder sehe, dass es Tools gibt, die noch nicht im regelmäßigen Angebot in TextGrid eingebunden sind. Also ich weiß z. B., dass dieser Kollationierer in der Demonstration ganz gut funktionierte, aber er ist nicht als ein ständiges Tool eingebunden und insofern ist es natürlich etwas für den Editor, der darauf gerade angewiesen ist, das dann fehlt. **I: Gibt es noch andere Tools, die noch fehlen, die Sie als entscheidenden Fortschritt ansehen würden?** B: Also ich würde mal so sagen... Also man muss immer unterscheiden zwischen dem, was eigentlich im Prinzip angeboten wird, und dem, was wenn ich jetzt im TextGridLab reingehe, wirklich auf der Bildschirmoberfläche ist. Da würde ich sagen, also was insgesamt, im Gesamtangebot..., das finde ich jetzt eigentlich auf den ersten Blick ausreichend. Also, ich wüsste da jetzt nichts, was drinnen fehlt. Man kann sich immer noch irgendwelche Tools hinzufügen, die nützlich sein mögen. Aber eben wie gesagt, die Auswahl, die wirklich zur Verfügung steht, die ist eben noch ein bisschen kleiner und da müsste noch etwas... **I: ... Aber was wirklich schon funktioniert, ist noch nicht vollständig da, ja.**

**I26-4#Gibt es Funktionen, die völlig neu für Sie sind?** B: Also für mich völlig neu war, diese, der ja auch funktioniert, dieser Linkeditor zwischen Bild und Text. Und in dem, wie ich es erfahren habe, funktioniert der auch gut und das ist sicher etwas, das vor einigen Jahren noch nicht so im Blick war wie heute. Also der Bedarf, auch ein Bild daneben oder die Originalhandschrift oder Druck oder was auch immer zu haben, ist wohl auch erst in den letzten Jahren so stark geworden, ja...

**I26-5#I: Wie finden Sie denn insgesamt die Benutzerfreundlichkeit? Das ist ja ein Punkt, den Sie wahrscheinlich ganz gut beurteilen können mit ihrer Erfahrung?** B: Ja, also ich denke, die Benutzerfreundlichkeit der Gesamtführung ist gut, oder auch sehr gut, also gerade

wenn man jetzt traditionelle Editionswerkzeuge gewohnt ist, dann ist das ein großer Fortschritt von der Benutzerfreundlichkeit. An einzelnen Stellen hat es vielleicht auch mal gehakt, aber da weiß ich nicht, ob das meine Unerfahrenheit war, oder ob da wirklich was hakte.

**I26-6#I: Welche Bedeutung messen Sie denn der Möglichkeit zu, ein solches System an die Arbeitsweisen anzupassen, also Individualisierbarkeit?** B: Ja, ich denke, in Kenntnis der Geisteswissenschaftler sehe ich da schon einen hohen Bedarf, dass es individualisierbar ist. In meiner Erfahrung, vielleicht liegt dem auch eine Notwendigkeit zugrunde, dass doch in verschiedenen Editionsprojekten sehr unterschiedliche Vorstellungen... Also man folgt Leitlinien, die teilweise ähnlich sind, doch auch ihre Besonderheiten haben mögen, und irgendwo legt man Wert auf eine besondere Art von Auszeichnung. Also ich denke schon: Individualisierbarkeit ist schon eine wichtige Sache. Wobei das klar ist, dass das immer ein Trade-Off ist: Wenn die Sachen so individuell sind, dann ist die Zusammenarbeit, die jetzt ja ein ganz anderer Wert ist, eben erschwert, die ist sicherlich ein Problem.

**I26-7#**Das ist sicherlich auch eine Chance dieser digitalen Edition, dass man perspektivisch viel, viel mehr verknüpfen kann als traditional. Ein traditioneller Schiller-Editor hat sich um Schiller gekümmert und sonst um gar nichts, schon kaum mehr um Goethe. Und man könnte sich jetzt natürlich vorstellen, dass Editionen viel mehr auf einander Bezug nehmen. **I: Sie meinen inhaltlich Verknüpfungen zwischen verschiedenen Editionen, oder was genau?** B: Auch inhaltlich... Also eine Idee, die schon lange rumspinnst und die allenfalls irgendwo in Ansätzen verwirklicht wird: Es gibt ja..., in allen Editionen werden ja irgendwelche Personenregister kürzer oder ausführlicher gemacht, die können ja auch ausführlicher sein. Nun ist das ja: In einer Zeit werden dann teilweise dieselben Personen beschrieben. Man könnte sich sehr gut vorstellen, dass das irgendwie gemeinsam genutzt wird, das ist ja auch jedes Mal ein ziemlich großer Aufwand und meinte auch eben Jean Paul und Schiller oder Hölderlin Edition ist und die Bezugspersonen sind teilweise die gleichen. Das ist...das wäre ein Punkt. **I: Ja, da könnte man also im Hintergrund Material über diese Personen, verknüpft in den unterschiedlichen Editionen, anbieten?** B: Ja, ja und dann gibt es natürlich auch Bezugspunkte. Also, wo ein Dichter auf den anderen Bezug nimmt, ja und also zeitliche Hintergründe usw. Es gäbe sicherlich sehr, sehr viel, wo man mehr kollaborativ arbeiten kann, als es traditionell ist.

**I26-8#I: Ja, kollaborativ wäre ja dann nicht nur die Verknüpfung auf inhaltlicher Ebene, sondern auch die Koordination von Arbeitsprozessen. Was stellen Sie sich da genau vor? Wo sehen Sie da Möglichkeiten für einen Fortschritt, Potenziale, Bedarf?** B: Naja, also da

denke ich, da sind ja auch einige Ansätze oder mehr als Ansätze in dem TextGrid vorhanden. D.h. natürlich z.B., dass Arbeiten verteilt, will nicht sagen delegiert, aber irgendwie verteilt werden können. Und um Arbeiten zu verteilen, muss man auch einen Überblick über den Workflow der Arbeiten haben. Also und das muss vom Editionstool oder von der Gesamtheit der Tools dann unterstützt werden und das ist natürlich eine Basis oder ein Erfordernis, um das nachhalten zu können und um da den Überblick zu bewahren, ja...

**I26-9#I: Stichwort Überblick bewahren. Das Ganze, wenn so eine Vernetzung mal vorhanden sein sollte, das hängt ja auch davon ab, wieviel Inhalte wirklich drin sind, wer da mitmacht, wäre ja dann ein sehr großes Netzwerk. Wie – stellen Sie sich vor – wäre das möglich Orientierung zu schaffen?** B: Naja, einerseits natürlich mal durch traditionelle Gliederung in Projekten und dergleichen. Und zum anderen, zunächst mal grundsätzlich diesen Workflow nachzuhalten. Ich habe jetzt im Kopf eher Sachen, die in anderen Bereichen waren, in diesem Fall in medizinischen Bereichen, wo es natürlich auch sehr wichtig ist, dass da nichts vergessen wird und dann war die Basis eben eine Gliederung der Arbeiten: Was kommt als nächstes? Wer ist zuständig dafür? Und in dem beides nachgehalten wird kann man eben auch sehen: Was sind jetzt eigentlich die nächsten Schritte, die erforderlich ist? Da muss eine Person einen Bericht eingeben, eine andere eine Diagnose, eine Therapieentscheidung fällen usw. usf. Und hier wäre es eben, es muss irgendwas transkribiert werden und vielleicht Korrektur gelesen, kollationiert und veröffentlicht werden. Also so... Und diese Schritte müssten eben irgendwie im System festgehalten werden und können auch in irgendeiner grafischen Form präsentiert werden. Aber so über die Details habe ich mir keine Gedanken gemacht. Aber wie gesagt, da sehe ich auch teilweise ganz deutliche Vorteile. Es ist ja fast so, dass diese Teile, die jetzt die Arbeitsorganisation und Rechtevergabe, die ja auch dazu gehört, wer was machen kann und darf... Die sind ja schon fast am Anfang, schon fast am stärksten ausgearbeitet, habe ich das Gefühl, in TextGrid. **I: Ja zunächst die Anmeldung und die Einrichtung von Projekten, das sind ja auch die ersten Schritte, die im Workshop gemacht wurden.**

**I26-10#Aber jetzt mal abgesehen von dem Lab, wie es jetzt konkret vorliegt, würde ich gerne wissen, welche Potentiale Sie in einer solchen Infrastruktur sehen, die ja hinter einer solchen Benutzeroberfläche liegt...Würde es da ausreichen einfach praktisch so eine Ordnerstruktur mit Zugriffsrechten zu machen? Wie Sie sich das vorstellen perspektivisch?** B: Naja, das Problem ist, das muss natürlich irgendwie dann verteilt auch sein, nehme ich mal an, das muss vielleicht nicht verteilt sein. Fangen wir mal anders an: Hier bei

TextGrid ist ja natürlich klar, dass da die Grid-Struktur sozusagen eine große Rolle spielt, und da bin ich jetzt nicht ganz sicher, ob diese Grid-Struktur nun schon das Entscheidende für diese Arbeitsorganisation ist. Denn die Grid-Struktur ist eigentlich ja zumindest traditionell eher eine Sache der Ressourcen, also wie ich Speicher und Rechnerkapazität zu Verfügung stelle. Und obwohl das sicher ein Ziel des Projekts ist, da sehe ich noch nicht so große Notwendigkeiten. Am ehesten sehe ich da Notwendigkeiten im Bereich der dauerhaften Datenspeicherung, die ja nun wirklich ein ganz echtes und großes Problem ist. Und an dem Punkt – denke ich – könnte diese Grid-Struktur... Dagegen glaube ich die Grid-Struktur, auf die man gut zurückgreifen kann, selber noch nichts jetzt eigentlich liefert für die Verteilung der Aufgaben, die – ich denke – wird doch eher auf einer vergleichsweise Oberflächenebene... Also die muss natürlich..., habe ich vorhin gesagt, die muss nachgehalten werden? Also es ist nicht nur eine Sache der Oberfläche, irgendwo müssen diese Schritte wirklich konzeptionell... Also es ist ein Unterschied, ob ich die Edition als ein Objekt sozusagen organisiere oder ob ich auch die Arbeit der Erstellung mitorganisiere, wo eben neu ganz neue Sachen, Arbeitsschritte und dergleichen, Personen, die zuständig sind... Das muss irgendwo festgehalten werden und auch gemeinsam zur Verfügung gestellt werden. Aber ich denke, dass das nicht notwendigerweise eine Grid-Struktur voraussetzen würde. **I: Ja also, dass man zunächst schon von der Editorenperspektive praktisch ausgeht und das erstmal daran anpasst?** B: Ja, das kann... Das muss natürlich erstmal verteilt zur Verfügung gestellt werden, die werden dann auch möglicherweise auch verteilt arbeiten. Also ich kenne auch praktisch wieder Projekte, die stark räumlich getrennt in L, S, P, B und anderen auch angefertigt werden. Aber auch das ginge zu Not ohne eine Grid-Technologie, also... **I: Ja also, aber das ist aber doch auch ein interessanter Punkt, dass jemand von P, von S aus, jemand von B aus zur gleichen Zeit an ein und demselben vielleicht sogar Dokument arbeiten. Meinen Sie das auch mit der Workflow-Organisation? Wie wäre das zu lösen, oder gibt es da schon Lösungen, die sie kennen, in dem Projekt?** B: Naja, in diesem Projekt ist es so, dass die dann meistens schon... zumindest in dieser extremen Arbeitsteilung ...sind dann schon die Dokumente auch digital... Also, da ist es dann wirklich so, dass jemand ein Dokument zugeteilt bekommt und das dann bearbeitet und dann werden die Sachen wieder zusammengefügt. Also, dass sie an ein und demselben Dokument arbeiten, ist in diesem Projekt, glaube ich, nicht der Fall gewesen. Aber denkbar wäre es schon. Also es gibt ja Tools, die sozusagen die gemeinsame Arbeit an einem Dokument... also das sehe ich auch hier in TextGrid, da kann man ja die Rechte so verteilen, dann kann man auch an ein und demselben Dokument arbeiten. Es wird dann eben in

dem Moment gesperrt für andere Korrekturen oder Bearbeitungsbegriffe. Also dafür gibt es, denke ich, Lösungen...

**I26-11#I: Inwiefern sehen Sie denn Möglichkeiten neue wissenschaftliche Erkenntnisse durch eHumanities zu erlangen – nicht nur im Rahmen von TextGrid, sondern ganz allgemein? Welche Möglichkeiten sehen Sie da?** B: Ja, also es ist grundsätzlich... also durch digitale Formen von...? **I: Ja, also durch all die Funktionen, die wir jetzt praktisch gerade**

**besprochen haben, einerseits Tools, andererseits die Vernetzung von Inhalten, aber auch von Arbeitsprozessen...** B: Also wenn ich jetzt mal wirklich gegenüber einer klassischen

Druckedition... dann ist ja ganz klar, dass der Überblick über Texte in einer ganz anderen Weise möglich ist. Selbst jemand, der heute nur noch eine gedruckte Edition macht, macht ja bei seiner Arbeit selber Gebrauch davon, dass er sich eben nach irgendwelchen Begriffen durch ungeheure Textmengen durcharbeiten kann und was er früher entweder gar nicht oder in lebenslanger Fleißarbeit zustande bringt. Von daher kann man sagen, man kann viele, viele Bezüge herstellen in einer Zeit, die ganz andere Ergebnisse realistisch machen. Aber man kann sich auch vorstellen, dass das noch weiter getrieben wird, indem man sozusagen systematisches, wie sagt man, so...

Datawarehouse-Techniken praktisch auf... Textmining, dass man solche Techniken anwendet. Die sind sicher nicht ganz am Anfang und ich kann sie auch nicht so genau einschätzen, aber das ist klar, dass hier, auch gegenüber dem jetzigen Stand, neue Forschungsergebnisse denkbar wären. Das ist im Grunde ja auch eine Fortsetzung dessen, was diese bessere Durchsuchbarkeit der Texte herstellt. Das andere ist eher auf der menschlichen Ebene – wären so Bezüge, die eben über eine Edition hinausreichen. Solche Fragestellungen waren vorher, denke ich, gar nicht im Blick, weil die Editoren oder auch die Forscher in dem einen Bereich waren. Oder die Forscher haben möglicherweise mal so punktuell mal irgendwo einen Bezug herstellen können, weil ihnen das auffiel, dass das da so ähnlich ist. Das systematisch zu erforschen, das ist vorher schwierig bis unmöglich gewesen. **I: Ja. Und da sehen sie jetzt Möglichkeiten auf der Kommentarebene oder auf der Textkritik...?**

B: Da sehe ich letztlich Möglichkeiten, die in die Kommentarebene einfließen würden, aber die würden selber Gebrauch machen eben von den Such- und Analysemöglichkeiten. Auf der Ebene der Such- und Analysemöglichkeiten gibt es jetzt nämlich noch was anderes, was auch in beide Richtungen geht. Also ich kann natürlich in erheblich größerem Maße Texte inhaltlich auszeichnen. Ich kann sozusagen... beide Seiten heißt, ich meine, ich kann einerseits es zur Verfügung stellen, ich muss also irgendwelche Arbeit schon reinstecken und markiere dann Texte im Hinblick auf gewisse Interessen. Auf der anderen Seite

kann ich eben mithilfe dieses inhaltlich ausgezeichneten Textes auch anders arbeiten. Also ich suche dann nicht mehr nur nach einem Wort, dieses Wort dieser Begriff, der bei jemand anders auftaucht, sondern ich kann eben auch sozusagen die Rolle dieses Wortes im Text bestimmen und das kann in verschiedenste Richtungen gehen, in linguistische Analyse, in historische Analyse. Ich sage jetzt aber auch gleich dazu, das führt aber auch dann dazu, dass die Editionstexte nahezu unhandhabbar werden können. Also ich sehe... Früher dachte man einfach, man macht eine sachliche Auszeichnung des Textes, das ist eine relativ ganz einfache Sache gewesen. Und jetzt gibt es eben Anforderungen, dass über dieses ohnehin schon starkes Maß jetzt schon vorhanden ist, hinaus zu taggen. Und ich denke, da muss man sich neue Sachen einfallen lassen. Da gibt es auch Sachen und ja, ich denke, da muss auch grundsätzlich über die Art des Taggings und der Auslagerung von solchen Informationen nachgedacht werden.

**I26-12#I: Ja, das birgt ja auch Konfliktpotential insofern, dass, wenn verschiedene Meinungen bestehen in einem Punkt, sei es Auszeichnung oder Kommentierung, und da noch zusammen gearbeitet wird daran, sich auch da geeinigt werden müsste – was wiederum durch zwei verschiedene Versionen ausgeglichen werden könnte, was aber wiederum...** B: Also es gibt ja konkrete... in TextGrid – und das finde ich nebenher einen guten Gedanken und fast besser als die Autoren selber meinten – dieses Baseline-Encoding. Da wird ja immer gesagt, das wäre nur so ein Notbehelf, weil man nun eben diese verschiedenen Interessen, die ja ... man kann sagen, es ist zufällig historisch entstanden, dass verschiedene Editionen in Auszeichnungen... Es kann aber auch..., wie sie gerade sagen, dass verschiedene Interessen dahinterstanden. Und da ist ja das Baseline-Encoding etwas, dass man sagt: Ja, gut, die will man auch so bestehen lassen und dann übersetzt man das in eine gemeinsame Sache, quasi als Notbehelf, um eben trotzdem gemeinsam ein Projekt machen zu können. Ich denke aber, dass das, was hier so ein bisschen als Notbehelf verkauft wird, dass man das im Grunde zum Konzept machen muss. Das man sagen muss: Es muss so ein Baseline-Encoding geben und darüber hinaus die Möglichkeit, zusätzliche Unterscheidungen, also Auszeichnungen einzuführen und die können dann eben entweder nach fachlich... Also wie gesagt: Ein Linguist und ein Historiker haben vollkommen verschiedene Interessen an den Auszeichnungen. Ein Literaturwissenschaftler noch mal andere. Das müsste alles dann daneben noch möglich sein. **I: Wäre ja auch gerade, weil soviel Platz zur Verfügung steht, ein Potential, das man ausnutzen müsste.** B: Ja, naja..., wobei eben... Der Platz steht zur Verfügung, aber es ist natürlich trotzdem ein gewisses Problem, wenn das alles in Form von einfachen XML-Tags in den Text hineingeschrieben wird, weil dann

gibt es ja auch wiederum schon das Problem, das bei XML deswegen nicht geht, weil überschneidendes Markup in jeder Menge entsteht. Und ich habe irgendwo gerade zufällig vor wenigen Tagen wieder gelesen, da haben die als Beispiel gehabt, ein Anwendungsgebiet von Medizin, das war ein Zweizeilen-Text und mit Auszeichnung waren das vier Seiten. **I: Da geht ja dann auch die Übersicht verloren für den Nutzer. Das ist dann das Problem.**

**I26-13#Was sehen Sie denn als bisher noch größtes Manko von dem gesamten Konzept bzw. TextGrid, so wie es geplant ist?** B: Ich würde mal so sagen: Ich würde es nicht Manko nennen, aber ich sehe ein großes Problem, das haben wir auch schon angesprochen, nämlich das, dass im Grunde die Edition nur auf erprobte, oder auf Tools, die Ihnen garantieren können, dass man mit ihnen das Editionsprojekt erfolgreich zu Ende führen kann. Da sehe ich einen Konflikt, der sozusagen nicht Manko im Sinne des schlechten Entwurfs ist, sondern der grundsätzlich immer vorhanden ist. Also insofern denke ich... Ich weiß auch nicht, wie man da ganz raus kommt aus diesem Problem, aber ich denke, man müsste eine planmäßige Phase irgendwie einbauen, in der sozusagen relativ ernste Spielprojekte gemacht werden. Also, in denen es sozusagen die Möglichkeit gibt, die Tools schon realitätsnah einzusetzen oder quasi wie in realen Projekten, wo aber trotzdem irgendwie eine Überschaubarkeit oder eine Sonderfinanzierung oder sonst irgendwas da ist, damit dies möglich ist, um nachher eben sozusagen die Erfahrung, die man eigentlich aus realen Projekten braucht, einzubinden. Und ja, das ist so eine Idee... Also das Projekt scheint mir das größte Problem zu sein, also bei neuen Editionstools. **I: Ja, also dass man praktisch eine Art Simulation braucht, aus der man dann wiederum den Bedarf zu konkretisieren kann, um dann eventuell das Endprodukt zu generieren?** B: Ja bzw. eben dass man so kleinere Projekte macht, in denen schon richtig gearbeitet wird, aber wo jetzt nicht... Oft sind ja Editionen 15 Jahres- oder 35 Jahres-Projekte und insofern beginnt man natürlich ungern mit einem Tool, was nicht schon auf solche Projekterfahrung zurückgreifen kann. Und insofern müsste man irgendwie so eine Zwischenphase haben, um das Tool für die Praxis propagieren zu können.

**I26-14#I: Und was sehen Sie jetzt, da Sie ja schon mit vielen Editionsprojekten zu tun hatten, als einen Bedarf, den man jetzt schon formulieren könnte, eben ohne diese verschiedenen Versuche, der an eHumanities-Unterstützung gerichtet wäre? Was wären da die wichtigsten Punkte?** B: Also jetzt darüber hinausgehend, was da im Moment... Ja, also eine Sache, was man im Bereich des Web ja „semantisches Web“ nennen würde – also Auszeichnungen, die eben eher auf die bedeutungstragende Ebene gehen. Also RDF wären



Formate dafür. Aber eben in diesem Bereich ist sicher insgesamt noch ein großer Bedarf. Ist natürlich immer auch ein hoher Anspruch, weiß man auch nicht, wie leicht das zu machen ist. Aber das wäre sicher was, was ich auch persönlich wünschenswert fände.

**I26-15#I: Und wo sehen Sie den größten Fortschritt, in dem, was bisher durch Angebote wie TextGrid oder durch die TextGrid-Idee besteht. Was ist das größte Potential zusammenfassend auf den Punkt gebracht?** B: Naja, ich denke schon, dass das Potential darin liegt, auf der Ebene einer inhaltlichen Struktur die Edition herauszugeben bzw. eben die Grundlage zur Verfügung zu stellen. Dass es eben ein relatives leicht zu handhabendes und ich sage mal auch in Klammern kollaboratives Tool ist, was eben auf der Basis von inhaltlicher, sachlicher Auszeichnung arbeitet und nicht jetzt wie irgendeine Textverarbeitung und eben im Vergleich zu anderen Sachen, die schon in Richtung sachlicher Auszeichnung gingen, deutlich besser handhabbar..., bessere, freundlichere Benutzeroberfläche hat. Also in dem Bereich sehe ich den Fortschritt.

**I26-16#I: Das bedeutet ja, dass digitale Edition als Hypertext praktisch besser erstellbar wäre dadurch. Wo sehen Sie da die Möglichkeiten? Also Sie haben ja jetzt gesagt, inhaltliche Auszeichnung und Verknüpfbarkeit?** B: Ja das ist klar. Das ist ja jetzt etwas, das könnte man auch... das bräuchte man auch für eine gedruckte Edition. Ich selber bin ein... Ich glaube an die Zukunft von elektronischen Editionen oder digitalen Editionen im engeren Sinne, also die auch wirklich digital born sozusagen sind und das heißt auch natürlich, dass die von Hypertext-Mitteln Gebrauch machen werden also, dass die auch in Hypertextform erscheinen. Und ja, ich sehe da eine große Zukunft, ich sehe die insbesondere, sage ich mal, in dem.... – Das sehe ich jetzt nicht nur weil da gerade ein Tablet-Computer auf den Markt kommt – sondern seit mindestens 15 Jahren meine ich, dass das eine Voraussetzung ist. Ich sehe es als ein großes Manko an, dass die jetzigen Sachen immer nur als so Serverprodukte konzipiert wurden, die man sich da irgendwo auf dem Bildschirm mal in Ausschnitten anschauen kann, ohne dass sie wirklich mit einem Buch konkurrieren. Und ich denke, es sollte eben schon mit einem Buch konkurrieren, aber eben ohne die Beschränkungen des traditionellen Printmediums, sondern eben dann die neuen Möglichkeiten nutzen, d.h. vor allem auch die Hypertext-Möglichkeiten nutzen und die... ja da gibt es ja dann auch noch darüber hinausgehende, aber vor allem mal diese und die freie Verschiebbarkeit, die es dort gibt und die Verwendung auf unterschiedlichen Ausgabemedien. Aber ich denke, das ist eine ganz wichtige Voraussetzung und das schien ja immer, als ob das ein Traum wäre, der nie erreicht wird. Weil diese digitale Editionen auf dem

Computer nicht angenommen wurden, aber ich glaube, das liegt auch an der äußeren Form. Das war nie eine wirklich benutzerfreundliche Form, also nicht eine mit der man Editionen lesen... **I: Also sie meinen jetzt auch einfache Digitalisate, praktisch eins zu eins, die eben noch nicht vollständig erschlossen worden sind mit den Mitteln, die eigentlich zur Verfügung stehen, mit Hypertextmitteln. Oder was meinen Sie genau mit den bisher bestehenden?** B: Also nein, ich meinte mit den bisher bestehenden... Also das vielleicht auch, also dass die nur Abbilder des Gedruckten sind. Nein, aber ich meinte aber vor allem auch die Geräte, auf denen sie zur Verfügung gestellt wurden. Und damit auch z. B. ein Computer, der auf dem Tisch steht, selbst ein Laptop, ist kein geeignetes Mittel, um wirklich darauf ein Buch zu lesen. Das ist zwar schon nah dran, aber es ist im Grunde... Ich selber würde es nicht gerne machen und wenn ich es schon nicht... Die meisten Leute machen es dann noch viel weniger gern. Und das andere, was ich eben noch sagen wollte: Diese Phase hat dann aber auch bei den Editoren, bei denen gerade, die digitale Edition machen, dazu geführt, dass sie den Ehrgeiz ganz aufgegeben haben, wirklich Bücher herzustellen, sondern sie haben dann irgendwie Materialien auf den Server gelegt. Und man kann dann in diesen Materialien suchen und sich vielleicht auch eine ganz interessante Textauswahl zusammenstellen und solche Sachen. Aber das ist was anderes als ein Buch. Also man soll diese Möglichkeiten zusätzlich haben und das alles machen können, aber man soll den Anspruch nicht aufgeben, dass das wirklich Bücher werden. Natürlich keine gedruckten und nicht mit den Beschränkungen, aber etwas, was schon mit dem Buch konkurrieren kann. Und nicht sagen, das Buch ist dann...

**I26-17#I: Ah ja, gut. Und wenn wir jetzt gerade bei dem Punkt sind, digitale Edition als Hypertext, das in Verbindung mit einer Infrastruktur, die ja über TextGrid geboten werden soll, also Anbindung an andere Editionen, gibt ja auch gerade dahingehend noch mal neue Möglichkeiten. Wie würden Sie sich das dann vorstellen?** B: Naja. Also ich könnte, statt es mir vorzustellen, daran erinnern, dass es eine ganz alte Vision in dieser Richtung gab. Also der Erfinder des Wortes Hypertext war ja Ted Nelson und Ted Nelson hat sich den Hypertext vorgestellt als eine universelle Bibliothek. Also eine Bibliothek, in der dann nicht mal mehr zitiert werden müsste, weil man immer gleich auf das Original verweisen kann. Man hat es ja im Hypertext. Das ist übrigens so, dass das im Web, in unserem Web nicht ohne Weiteres so möglich wäre, weil ich ja eigentlich immer einen Anker brauche in den Dokumenten und den Anker habe ich in der Regel selber nicht das Recht dort anzulegen. Und von daher ist es nicht ganz richtig. Das Web hat diese Vision erfunden. Diese Vision ist eigentlich eine noch

weitergehende, die also wirklich ein Universum an Dokumenten zur Verfügung stellt und die Bezugsmöglichkeiten sind in der Tat grundsätzlich mit dem Hypertext Konzept gegeben. Ich kann das dann sowohl innerhalb der Texte wie auch auf Erläuterungstexte... Also ich gebe Erläuterungstexte für den Anfänger, ich gebe vertiefende Informationen für den Kenner des entsprechenden. Also da kann man wunderbare Sachen machen. **I: Ja! Das ist interessant, dass Sie Ted Nelson erwähnen, geht ja auch zurück auf Vannevar Bush's Memex, das geht ja auch in die Richtung von der Vision...** B: Also wobei der Vannevar Bush mehr so eine Arbeitsumgebung im Auge hat, das würde dann noch mal mehr... **I: Schreibtisch...** B: Während der Ted Nelson eher die Bibliothek sozusagen als Hauptvision..., aber der kannte das andere natürlich auch und hat das insofern mit als Möglichkeit... **I: Ah ja, stimmt! Das geht wieder in eine andere Richtung, das wäre wie beim Lab und beim Repository?** B: Ja! Ja genau. **I: Gut, herzlichen Dank.** B: Danke auch.
