# Supplementary material
Source: publisher site journal article supplement (https://www.degruyterbrill.com/publication/isbn/9783110463927/downloadAsset/9783110463927_Interviews.zip)
Supplement: Supplementary file 20 [file I27.pdf › Interviews/I27.pdf]

**I27-1#Interviewer: Inwiefern arbeiten Sie denn im Bereich eHumanities? Wie würden Sie da ihre Tätigkeit und ihre Erfahrungen beschreiben?**

Befragte/r: Also ich arbeite im Grunde vollständig im Bereich eHumanities. Ich habe im Moment zwei halbe Stellen. Das Eine nennt sich „lecturer in Humanities IT“ an der philosophischen Fakultät, wo ich zu hundert Prozent mit Lehre beschäftigt bin, d. h. ich gebe regelmäßig jedes Semester vier Kurse für sämtliche Studierende der philosophischen Fakultät, also nicht technisch spezialisierte Menschen, sondern allgemeine Geisteswissenschaftler, die wir versuchen, sozusagen technisch für digitale Geisteswissenschaften fit zu machen. Das ist die eine halbe Stelle. Die andere halbe Stelle ist rein administrativ und bei der leite, organisiere ich das Center für eHumanities, d.h. ein fakultätsweites Lehr- und Forschungszentrum, so nennt sich das in C, das sich eben mit den eHumanities beschäftigt. Mein drittes Standbein ist sozusagen ein virtuelles Institut, das nennt sich I. Das beschäftigt sich hauptsächlich mit digitalen Editionen, aber auch mit digitalen Bibliotheken, allgemeinen digitalen geisteswissenschaftlichen Problemen, machen also z. B. Sachen im Bereich Handschriftenforschung, ohne dass es dabei um Editionen gehen müsste. Und das sind natürlich jetzt drei Positionen, die noch nicht lange laufen, sondern erst seit einem Jahr, seit zwei Jahren oder seit vier Jahren, aber im Grunde sind das alles Sachen, die ich schon seit ungefähr 10, 15 Jahren mache. **I: D.h. die Erfahrung wäre relativ hoch einzustufen in dem Bereich, also sowohl was das Technische angeht, aber auch was das Editorische angeht?** B: Also zu meinen eigenen Forschungsschwerpunkten gehört eindeutig digitale Editorik. Also meine Dissertation ist darüber gelaufen, ich habe diverse Publikationen dazu rausgebracht in Handbüchern. Also das ist schon mein persönlicher Schwerpunkt.

**I27-2#I: Ja, vor diesem Hintergrund, wie waren da ihre Erwartungen, was den TextGrid-Workshop angeht? Mit welchen Erwartungen sind Sie da hingegangen?**

B: Erstmal muss man natürlich sagen, dass ich TextGrid zwar verfolge von Anfang an und natürlich weiß, was das ist, worum es geht oder auch schon direkt bei der Beantragung das natürlich mitbekommen habe, weil ich zu der Zeit selbst auch noch in G gearbeitet habe, was ja auch ein Projektpartner ist, so dass ich da auch am Anfang so ein bisschen involviert war, als es um Spezifikationssprints und solche Dinge ging, um Metadatenmodelle, weil das eins meiner anderen Standbeine ist, Metadatenstandards und -modelle. Andererseits habe ich das aber nur am Rande verfolgt, weil wir natürlich nicht im Projekt selbst involviert sind und das deshalb sehr..., dann, als ich dann wieder in C war, sehr von außen betrachtet haben und wir es eigentlich auch nie wirklich in der

eigenen Arbeit eingesetzt haben, d. h. die Position war immer die eines sehr externen Beobachters. Aber da der Workshop ja einer Tagung vorgeschaltet war, an der ich sowieso teilnahm, habe ich mir gedacht, dass die Gelegenheit günstig ist, dann doch mal die Wissenslücken da ein wenig zu schließen. **I: Und wenn Sie das Projekt ja immer beobachtet haben, wenn auch aus einiger Distanz, dann haben Sie sich wahrscheinlich auch gewisse Funktionen versprochen oder gewisse Dinge, die Sie von dem System erwartet haben oder von der Idee. Was waren da ihre Erwartungen, inwiefern wurden die erfüllt oder auch nicht?** B: Ok, Erwartung war, dass TextGrid eine Arbeitsumgebung bietet, in deren Zentrum ein Editor steht, an den verschiedene weitere Funktionalitäten angekoppelt sind: Suchfunktionen über einen dahinterliegenden Suchraum möglicherweise, die Möglichkeit zur Einbindung von Ressourcen, die woanders liegen, und eben spezialisierte Tools. Man könnte denken eben an..., das was jetzt auch schon da ist – insofern ist meine Vorstellung natürlich eben ein bisschen..., nicht mehr ganz jungfräulich, sondern schon geprägt – Funktionalitäten wie Lemmatisierer oder Text-Bild-Verknüpfung sozusagen, Transkription auf dem Bild. Ich weiß nicht, ob das wirklich meine Erwartung war, aber das kommt sehr nah an das ran, denke ich mal. Also die Idee, dass man mit Texten in einer Arbeitsumgebung arbeiten kann, die spezielle Features bereitstellt. Und das hat sich insofern bestätigt, aber wie gesagt, im Nachhinein ist es schwer zu sagen, was eigentlich vorher die Erwartung war.

**I27-3#I: Ja, also von der Idee her war im Grunde schon das da, was Sie sich auch darunter vorgestellt haben? Wie kann man das im Bezug auf die bisherige Umsetzung sagen? Also das, was im Workshop jetzt möglich war?** B: Ja, man wusste natürlich so ein bisschen, in welche Richtung TextGrid geht im Grunde. Da kann man natürlich über Differenzen sprechen, zwischen dem, was man im Allgemeinen erwarten würde und dem, was man wusste, was TextGrid eben machen würde. Damit wären wir sozusagen schon bei möglichen Kritikpunkten oder grundsätzlichen Überlegungen – und zwar: Mir war klar, dass TextGrid im Grunde dieses gekapselte Modell verfolgt, sozusagen eine Stand-Alone-Application, was ein bisschen neben dem Trend liegt, alles sozusagen online browser-basiert zu machen. Das war mir natürlich klar, deshalb... Insofern konnte ich natürlich die Erwartung, dass es sozusagen nahtlos in den Browser verläuft, so nicht haben. Das wäre so einer der Punkte. **I: Und da finden Sie, dass eine andere Lösung besser wäre? Oder sagen Sie nur der Trend ist da...** B: Ich sage, der Trend ist ein anderer, und ich hätte, wenn ich das persönlich zu entscheiden gehabt hätte, versucht, es browser-basiert zu machen. Ich vermute, dass es gute Gründe dagegen gab oder gibt. Es ist natürlich so,

dass so eine Stand-Alone-Application unmittelbar ein anderes Maß an Einarbeitung erfordert, weil man natürlich nicht die gewohnte Außenumgebung hat. Und jetzt ist es hier so, dass es in so einer Eclipse-Umgebung läuft, d. h. die Chance, dass es viele Leute sind, die das auch schon kennen, ist natürlich da. Für Leute, die gewohnt sind, mit diesen Dingen zu arbeiten, geht es einigermaßen geschmeidig, das kann man sicher machen. Aber ich denke, für einen Erstbenutzer stellt es eine Hürde da, ein komplett anderes Programm anzuwerfen. Also die Geschmeidigkeit des Erstzugriffs ist, denke ich, bei einer Browserumgebung eine durchaus andere, gerade wenn ich an Menschen denke, Geisteswissenschaftler, die sozusagen von der inhaltlichen Seite kommen und edieren und dann mit so etwas arbeiten sollen. Da könnte ich mir vorstellen, dass die Hürde hoch ist. Andererseits, wenn der Anspruch ist, dass man ein umfassendes Tool hat, dann ist auch der Anreiz hoch genug, um diese Hürde zu nehmen – möglicherweise. **I: Wobei wir jetzt dann auch schon bei dem Aspekt Benutzerfreundlichkeit oder Bedienfreundlichkeit wären.**

**I27-4#Hätten Sie da noch etwas hinzuzufügen, was jetzt aus ihrer Perspektive zu sagen wäre. Sie sind sicher jemand, der vielleicht diese erste Hürde von jemand, der gar nicht mit Eclipse gearbeitet hat, nicht mehr nehmen müsste, oder?** B: Es ist ja so: Ich lehre ja jedes Semester auch Programmieren und teste dabei relativ viele Entwicklungsumgebungen und Editoren durch. Und es ist so, dass ich jede Entwicklungsumgebung, jedes Tool sofort wieder deinstalliere, das mich zwingt, in Projekten zu denken, und das tut natürlich TextGrid. Man muss erstmal ein Projekt anlegen und Rechte vergeben. Und das halte ich auch für eine Hürde. Weil jemand, der flott anfangen möchte und sagt, ich habe hier Dateien, mit denen will ich arbeiten, steht erstmal vor dieser Schwelle, ein Projekt anzulegen und Rechte zu vergeben. Ich halte das für eine Hürde. Ich weiß, dass professionelle Umgebungen so arbeiten, aber gerade eben, sagen wir mal, der klassische geisteswissenschaftliche Professor, der noch nie davon gehört hat, dass man auf dieser Abstraktionsebene arbeiten soll, mit Projekten und Rechten, für den ist das wieder eine Hürde. Das finde ich ungünstig. **I: Und die Alternative wäre dann auch etwas, was in einer Browserumgebung ohne jegliche Vorgaben dieser Art schon einsetzbar wäre?** B: Ja die Alternative wäre, dass man zwar einerseits dieses Projektkonzept hat, aber man andererseits die Möglichkeit hat, es zu überspringen. Ja also, dass man trotzdem die Möglichkeit hat, zu sagen. Ich habe hier einen Fall. Das will ich öffnen, dran arbeiten und es wieder speichern. Da denke ich, dadurch könnte man eine Hürde beseitigen und wenn Leute dann intensiver daran arbeiten, können Sie immer noch auf die Idee kommen zu sagen: Oh, wenn ich meine Arbeit in

einem Projekt organisiere, dann macht es Sinn. Aber man schafft eben eine zusätzliche Hürde am Anfang.

**I27-5#I: Das wäre ja auch ein Aspekt, der damit zu tun hat, inwiefern kann man das Ganze an den eigenen Erfahrungshintergrund und an die eigene Arbeitsweise anpassen, also Individualisierbarkeit. Welche Bedeutung messen Sie dem Punkt zu oder welche Aspekte sehen Sie in der Beziehung?** B: Ja, wie gesagt, da sehe ich den Punkt noch nicht. Wo wäre die Vision für die Individualisierbarkeit oder in der Personalisierung?

**I: Ja, also jetzt in der Umsetzung von TextGrid sehen Sie den Punkt noch gar nicht?** B: Nein. Ja, ich verstehe noch nicht, was Sie im Hinterkopf dabei haben?

**I: Ich habe dabei gar nichts im Hinterkopf. Ich würde gerne wissen, was Sie mit dem Aspekt verbinden bzw. was Sie sich vorstellen könnten bzw. befürworten würden? Was Sie als bedeutend ansehen in dem Bereich, als wünschenswert?** I: Es gibt durch diesen... Projektbezug gibt es ja im Grunde ja so eine Art Personalisierung, weil man ja seine Sachen in diesem Projektkontext beisammen hat. Das ist „on the long run“ schon sinnvoll irgendwo, deshalb gibt es so was ja in diesen Entwicklungsumgebungen so. Das sehe ich schon. Aber sonst würde mir da zunächst nichts einfallen.

**I: Und in dem Sinne, dass das insofern, was ja auch die Idee bei TextGrid ist, modular organisiert ist, dass eben eigene Tools angeschlossen werden können bzw. auch die eigenen Datenbestände angeschlossen werden können, eben auf individualisierte Art und Weise?** B: Gut, aber das sind zwei verschiedene Dinge. Das Anschließen von Datenbeständen, das scheint mir naheliegend und einfach und vernünftig zu sein, wobei mir jetzt nicht ganz klar ist, wie weit eine Öffnung der eigenen Datenbestände für eine weitere Community schon implementiert ist oder vorgesehen ist. Mit den Tools sieht es natürlich ganz anders aus, weil das eine andere Art von Komplexität hat und ein anderes technisches Know-How erfordert. Und da weiß ich halt... da kenn ich mich halt auch nicht aus, wie die Schnittstellen im Moment da jetzt sind und wie Tools einzubinden wären, würde aber vermuten, dass das nicht trivial ist.

**I: Aber zur Bedeutung...** B: Das scheint mir ein relativ advancedtes Feature sozusagen zu sein, bei dem ich nicht weiß, wann die Community wirklich dahin kommt, dass sie sagt: Wir haben hier Tools, die wir einbauen wollen und auch können. Weil ich auch glaube, dass der klassische Geisteswissenschaftler, der auch den Bedarf an ein Tool hat, erstmal dieses Tool gar nicht kennt, das Tool nicht hat und nicht weiß, wie das Tool eingebaut werden kann. Das ist eine Dienstleistung, die eigentlich nur innerhalb des TextGrid-Projekts laufen kann, weil das Know-How sagen wir an einem Lehrstuhl ein Tool zu haben und es da anzubinden, da wäre ich

skeptisch, ob die da ist. **I: Also würden Sie sagen, dass der Bedarf bei dem eigentlichen reinen Nutzer da eigentlich gar nicht angemeldet werden würde, weil die Kenntnis oft nicht besteht?** B: Doch den Bedarf glaub ich schon, nur die Fähigkeit, das einzubringen, sehe ich nicht. Den Bedarf sehe ich schon. Das man eine Art „wishlist“ führen könnte, das halte ich für durchaus sinnvoll, aber ich glaube, das ist eben auf einem technischen Level, das eher innerhalb des Projekts bewältigt werden könnte, als außerhalb oder in Zusatzprojekten.

**I27-6#I: Bei dem Workshop, haben Sie da Funktionen festgestellt, die für Sie völlig neu waren trotz ihrer reichhaltigen Erfahrung in dem Bereich bzw. gab es Funktionen, die ihnen noch fehlen, wo Sie sagen, das müsste noch ganz klar einfließen in dieses Lab?** B: Also ich war sehr erfreut über dieses Bild-... Image-Linking. Ich habe jetzt nicht ganz ausgetestet, ob die Funktionalität da ist, dass ich einen Ausschnitt markiere und den transkribiere und der Bezug bestehen bleibt. Das halte ich für ein sehr sehr wichtiges Feature, also für ein extrem wichtiges Feature, das auch so ja in anderen Editionstools nicht vorhanden ist. Es gibt natürlich diese Text-Image-Linking-Tools, aber zu sagen: Eine Editions Umgebung muss uns die Möglichkeit geben, auf dem Bild des Dokuments zu transkribieren. Das halte ich für extrem wichtig und zentral, weil es eben auch sozusagen eine neue Methodologie unterstützt, die einfach die Nähe der Transkription zu der Vorlage betont, auch sozusagen eine positionelle Nähe, das ist einfach sozusagen konvergent zu den Entwicklungen im methodischen Bereich Visual Turn .. und Material Philology und diese ganzen Dinge. Dafür ist es absolut zentral. Ein gutes Beispiel für wichtige Tools ist natürlich dieser Lemmatizer, das ist – denke ich – auch sehr wichtig. Was noch interessant wäre, aber das steht bestimmt auch auf der Liste, ist sozusagen die Frage von Annotation hinsichtlich externer Verknüpfbarkeit, d. h. Identifizierung von Dingen, Semantisierung, d. h. sozusagen Personenidentifikation, Ortsidentifikation – das in Verbindung mit kontrollierten Vokabularen oder Normdaten. Kann ich jetzt nicht abschätzen, inwieweit das jetzt schon drin ist. Das wäre sozusagen für mich jetzt der nächste Punkt auf der Liste, weil das etwas ist, was wichtig ist und weil das auch etwas ist, was gut unterstützbar ist. Das ich sozusagen das TextGridLab mit der PND verknüpfen kann. Das wäre eine ganz schicke Sache. Oder eben mit einem GoogleMaps-Service oder einem kontrollierten Vokabular für geografische Einheiten. Das sind, denke ich, so nächste Schritte, die ganz interessant wären. Jetzt überlege ich, was sonst noch interessant sein könnte... **I: Also auch eine semantische Erschließung und auch ein interdisziplinärer Aspekt dann?** B: Ja... gerade überlegen, was man in der editorischen Arbeit dann noch so treibt? Die Frage wäre, ob man sozusagen projektweise, also auf der Ebene

des individuellen Projekts, kontrollierte Vokabulare einführen wollte. Man hat da ein Briefeditionsprojekt – dass man sagt: Wir haben hier eine Liste der Personen, die darin vorkommen, das ist eben nicht PND, weil die eben spezieller sind. Ob so etwas eben unterstützt werden könnte?

**I27-7#I: Das hat ja auch damit zu tun, welche Art von Infrastruktur überhaupt schon verfügbar ist, also welche vernetzten Inhalte da sind, wie groß überhaupt die Datenbestände dahinter sind und wie sie verknüpft sind. Wie stellen Sie sich das vor in idealer Weise, diese Infrastruktur, dieses Netzwerk, auf das ja eigentlich zugegriffen werden sollte?** B: Gut, die Anfänge werden ja anscheinend jetzt mit dieser Einbindung der Datenbestände von Zeno gemacht und das würde man natürlich gerne oder hätte man von Anfang an sozusagen weiter gedacht. Die Möglichkeit, an TextGrid ganze Datenrepositories anzubinden, also zum Beispiel digitalisierte Bibliotheken, digitalisierte Archive, so dass man das Grundlagenmaterial über TextGrid sozusagen abgreifen könnte, wobei die Frage ist, ob da als Zwischenschicht natürlich irgendwelche Metadatenportale zweckmäßigerweise eingebunden werden, weil sonst natürlich TextGrid sich Aufgaben auflädt, die da eigentlich nicht hingehören. Im Idealfall gäbe es zentrale Portale, digitalisierte Archivgüter oder digitalisierte Handschriftenbibliotheken, auf die TextGrid zugreifen könnte, in der Weise, dass über die Metadaten wirklich die Objekte oder Bilder der Objekte hier reinkommen und man mit denen arbeiten kann. Das wäre, glaube ich, das Idealszenario und dann gehört es ja wahrscheinlich von Anfang an zum Idealszenario, dass Dinge erarbeitet werden, irgendwo abgelegt werden und die selbst auch wieder je nach Rechtekonfiguration von überall zugreifbar werden – also die Idee, das, was man tut, in das Grid sozusagen zurück zu speichern und nicht lokal.

**I27-8#I: Und das wäre dann sozusagen auch gleichzeitig schon die Lösung für die Orientierung im Netzwerk – Portale und ähnliche Erschließungsmöglichkeiten oder was würden Sie da sehen?** B: Das ist die Frage. Im Moment sieht man TextGrid ja denke ich eher als Arbeitsumgebung. Das heißt die Idee der Verwaltung von Wissen, von Metadatenwissen wäre erstmal außerhalb. TextGrid bietet sozusagen den Zugang dazu. Aber irgendwo muss das natürlich auch zusammenspielen. Also das, was in TextGrid entsteht, muss ja auch irgendwie in einer Weise erschlossen sein, so dass es wieder für die Portale zugänglich sein wird. Also ich habe gesehen bei TextGrid, es wird ein relativ großer Wert darauf gelegt, dass man, wenn man mit Objekten arbeitet oder sie anlegt, Metadaten erzeugt. Das ist natürlich sehr wichtig. Das ist zwar einerseits eine Zumutung für einen Wissenschaftler, aber ich denke: Ohne das geht es

einfach nicht, sonst sind die Dinge nicht nachnutzbar in anderen Kontexten. **I: Ja, muss ja erfassbar sein aus anderen Richtungen. Ja.**

**I27-9#Und jetzt mal abgesehen von der Vernetzung der Inhalte, bei der wir jetzt waren, ist ja auch beabsichtigt, Arbeitsprozesse zu vernetzen – also der kollaborative Aspekt. Welche Bedeutung messen Sie diesem zu und wie stellen Sie sich da die Ideallösung vor?** B: Also ich denke, da trägt TextGrid zu einer Entwicklung bei, weil ich glaube, dass diese etablierten Workflows ja noch nicht so existieren. Geisteswissenschaftler, denke ich, arbeiten in der Regel nicht mit definierten Workflows, aber das wird sich in Zukunft ändern. Ich denke, TextGrid kann da einen guten Beitrag leisten, um sozusagen das Bewusstsein für die Bedeutung dieser Workflows zu schaffen. Ich denke, es gibt kein Modell, das man einfach abbilden kann, sondern das ist eine Entwicklung, die jetzt erst läuft. Und ich denke, man muss sehen, wenn TextGrid solche Workflows vorschlägt, wie die angenommen werden. Das ist, denke ich, im Moment noch so ein Spiel von Experiment und Bewährung. Es ist ja auch, denke ich, auch schwierig zu sagen: Lieber Wissenschaftler, entwickle deinen eigenen Workflow in so einem technischen Rahmenwerk, das wieder technisch komplex ist. Insofern wäre es vielleicht gut, wenn TextGrid einen Satz an Workflows vorschlagen würde, z. B. einen klassischen Workflow für eine Briefedition oder für die Erstellung von Basistransliterationen auf der Grundlage bestehender digitaler Bibliotheken mit Bildern, und dass man dann natürlich sehen muss: Funktioniert das? Also ich denke, da muss es ein ganz enges Feedback geben. Aber grundsätzlich halte ich das für einen sinnvollen Ansatz, der in die Zukunft weist, der aber nicht auf etablierten Mustern aufsetzen kann. Darin besteht eine Schwierigkeit.

**I27-10#I: Und diese Workflows müssten im Prinzip auch veränderbar sein durch die jeweiligen Nutzer, wenn das funktionieren soll? Oder soll das allein darauf basieren: wird angenommen – wird nicht angenommen, und dann Verbesserungsvorschläge einarbeiten, oder so was?** B: Ja, die Frage ist immer, was kann man erwarten von den Benutzern? Und diese Workflows sind natürlich auf einem gewissen Abstraktionsniveau. Klar, wenn man ein größeres Forschungsprojekt hat, was über 5 Jahre läuft mit fünf Mitarbeitern, die werden die Möglichkeit haben, sich auch mit dieser Ebene von Workflows zu beschäftigen. Aber wenn Sie einen Einzelwissenschaftler haben, der zwei Jahre an einer Diss sitzt, dann wird der möglicherweise in diese Abstraktionsebene seiner eigenen Arbeit nicht einsteigen wollen. Sondern da ist es vielleicht wirklich so, dass man sagt: Hier ist ein Workflow, guck doch mal, ob der passt oder nicht passt, und gibt uns ein Feedback. Aber zu sagen: Arbeite dich so in die Strukturen rein, dass

du den Workflow selbst organisierst – da bin ich skeptisch. Es sei denn man kann ihn so einfach und transparent machen, dass es einfach wird. Und da bin ich skeptisch, weil einfach dieses Denken in Workflows jetzt nicht klassischer Teil geisteswissenschaftlicher Individualarbeit ist.

**I27-11#I: Ja, das Problem bei diesen Workflow-Organisationen wäre dann ja auch die Verschaltung von Arbeitsprozessen, die an verschiedenen Orten stattfinden und eventuell am gleichen Dokument zur gleichen Zeit. Also das würde ich jetzt mal als ein zentrales Problem sehen oder wäre das noch zu erweitern? Wie sehen Sie das?**

B: Nein, ich denke, das ist schon relativ hoch gegriffen. Also wenn man dieses Problem lösen kann, ist man schon sehr weit. **I: Ja, was wäre dann der Schritt davor, auf dem Weg dahin?**

B: Der Schritt davor ist, dass man eigentlich ein relativ enges Workflow-Konzept hat, das eben aus relativ wenigen Schritten besteht, die möglicherweise nacheinander und an einer Stelle abgearbeitet werden. Das ist natürlich erstmal eine starke Trivialisierung, aber entspricht, glaube ich, vielen Projektwirklichkeiten. **I: Dass also doch dann ein Editor erstmal diese Schritte vollziehen kann?**

B: Bei dieser Workflow-Kiste, gerade weil sie nicht so verbreitet ist in den eHumanities, ist gerade die Transparenz ganz wichtig, die sofortige Verstehbarkeit, am besten visualisiert in einem einfachen Modell. Dass man sozusagen ein fertiges Setup hat, wo man sagt: Ok, Sie wollen ein Objekt edieren, dann gibt es folgende Operationen und dafür gibt es folgende Module und das wird mit folgenden Tools unterstützt. Das können Sie, wenn Sie wollen, in der Reihe abarbeiten und Sie hinterlassen jeweils eine Markierung, was Sie getan haben, damit das dokumentiert ist und Sie immer wissen, wo Sie sind, und das in einem weiteren Schritt möglicherweise dann auch kollaborativ dann erfolgt – und da, denke ich, ist Vereinfachung im Moment noch der Weg, um Leute abzuholen. **I: Und das sollte aber über diese Workflows laufen. Also jetzt... bspw. wird ja auch darüber gesprochen Versionsverwaltung, Versionierung zur Bearbeitung eines Dokuments ohne spezielle Workflow-Schritte?**

B: Das sollte beides möglich sein. Aber ich denke, genau wie bei dem, was wir am Anfang besprochen haben: Auch das Konzept des Workflows ist erstmal eine Hürde und eine Schwelle für Leute, die das bisher nicht kannten. Und deswegen wäre es schön sozusagen, das Ganze auch ohne diese Workflows nutzbar zu machen und das ist es natürlich auch. Das ist ein Zusatzfeature das macht sicher Sinn, aber es muss auch immer möglich sein auf einem trivialerem Level einzusteigen oder reinzuschnuppern. **I: Aber die Bedeutung würden Sie dann schon als hoch einstufen, generell was Kollaborationsmöglichkeiten angeht?**

B: Ja also, wenn wir von echten Forschungsprojekten reden, an denen mehrere Menschen über lange Zeit, an verschiedenen Orten



beteiligt sind, dann wird das relevant. Aber solange wir von der klassischen geisteswissenschaftlichen Einzelarbeit ausgehen, findet der Workflow im Kopf statt, dann ist es wieder ein bisschen overdosed, wenn man das in den Vordergrund stellt.

**I27-12#I: Welche Möglichkeiten sehen Sie denn, neue wissenschaftliche Erkenntnisse zu gewinnen, digital unterstützt, die man jetzt eben nach traditionellen Methoden und Verfahrensweisen nicht hätte?** B: Gut, da sind ja mehrere Bereiche. Das ist einerseits eben diese engere Verzahnung von Text und Bild, d. h. sozusagen die bildliche Organisation von Text. Die war ja sozusagen in der klassischen Welt überhaupt nicht gut benutzbar. Und die bildliche Organisation von Texten hat ihren eigenen Aussagewert. Und den kriegen wir erst jetzt in den Griff, wenn wir diese Dinge auch zusammen denken und zusammen sichtbar machen. Das wäre eine der Dimensionen. Ich bin ein gelernter Historiker und für mich war das immer ein Problem, dass sozusagen der abstrahierte Text sich vor das reale Dokument schiebt und vieles verdeckt, was eigentlich an wichtigen Informationen drin steckt. Und das überwinden wir jetzt durch diese starke Verzahnung ein bisschen. Das andere ist eben diese semantische Richtung, dass wir die Dinge eindeutiger identifizieren können, klarer identifizieren, genauer fassen können. Dadurch, dass ich natürlich die Vernetzungen und die Querverbindungen zwischen Dokumenten viel besser in den Griff bekomme. Und das dritte, was ich wichtig finde, ist, dass allein schon der Umgang mit XML und TEI uns dazu zwingt, unsere Modelle, die wir sowieso haben, explizit zu machen und damit auch viel schärfer und präziser zu machen und damit erst die Möglichkeit bekommen, sozusagen projektübergreifend und korpusweit mit ähnlichen Konzepten zu arbeiten, was früher eben nicht möglich war, wenn jeder Wissenschaftler eben seine impliziten Konzepte hatte, die gar nicht greifbar waren sozusagen. Und ich glaube, dass diese drei Aspekte, auch wenn das bisher nicht aus der Antwort rausgekommen ist, tatsächlich zu neuen Erkenntnissen führen.

**I27-13#I: Und der Punkt der Vernetzung digitaler Editionen untereinander oder mit anderen Ressourcen. Inwiefern können Sie sich vorstellen, dass dabei neue Erkenntnisse erlangt werden können?** B: Also erstmal würde ich sagen, dass das nicht unbedingt eine Baustelle von TextGrid ist. Denn TextGrid sehe ich erstmal mehr so auf der Werkzeugebene.

**I: Ja, wir müssen jetzt auch nicht ganz eng an TextGrid bleiben, wie gesagt, mehr allgemein.**

B: Also der Mehrwert dadurch, dass Dinge tief semantisch erschlossen sind und dann zusammen geschaltet werden, ich denke, der, der entsteht dann wieder in neuen Projekten, die sich entweder thematisch mit etwas beschäftigen oder die sozusagen das Ganze portalmäßig aufbereiten und zusammenführen. Und da ist natürlich die Bedeutung von TextGrid darin, die standardisierte

Vorgehensweise dieser Erschließung zu unterstützen. Da ist es natürlich essentiell, dass alle auf die gleiche Weise PND-Nummern verwenden und solche Dinge, dass alle auf die gleiche Weise TEI-Schemata verwenden oder Sub-Schemata für bestimmte Domänen. Ich denke, da hat TextGrid einfach eine standardisierende Funktion auch für die Community. **I: Legt also praktisch dann die Basis dafür, dass wirklich Projekte verknüpft werden können und auf demselben Hintergrund dann auch diese Bezüge gezeigt werden können beispielsweise.** B: Da ist natürlich dann die Frage, ob TextGrid da nicht stärker sozusagen auch eine didaktische Funktion zukommen könnte. Dass es eben zeigt, wie Personendaten erschlossen und aufbereitet werden sollen, wie geografische Informationen aufbereitet werden können oder wie eben ganz bestimmte Themen aus bestimmten Sub-Domains sozusagen bearbeitet werden, weiß ich nicht – literarische Gattungen oder sonst irgendwelche Dinge, historische Ereignisse, was man sozusagen alles aus einem Forschungsinteresse heraus modellieren könnte und das könnte wieder in TextGrid als ein Art von Tool zurück als eine Art von „Best Practice“ sozusagen. **I: Das wäre ja, wenn man jetzt mal bei den digitalen Editionen bliebe, wäre ja eine solche Vernetzung zunächst mal auf der Kommentarebene naheliegend, oder?** B: Gut, dann sind wir ja natürlich bei einer anderen aktuellen Baustelle, dem Annotationsprinzip im erweiterten Sinne. Das ist natürlich die Frage, ob man konzeptionell zwei Dinge unterscheidet. Ob man sagt: Einerseits gibt es die ganzen XML-Ressourcen, die im Grunde Repräsentationsformen von Dokumenten sind plus erschließendem Wissen, oder ob es dann außerhalb davon sozusagen einen erweiterten Annotationsraum gibt, in dem über Dokumente gesprochen wird. Das ist sicher auch sozusagen im Trend drin.

I27-14#Das müsste man überlegen, inwieweit das mit dem Grundcharakter jetzt z. B. des TextGridLab ein Werkzeug zur Verarbeitung zu sein, übereinkommt oder damit kollidiert? Also ob sozusagen ein Annotationstool, wo die Community über etwas Bestehendes spricht, nicht sozusagen auf einer anderen Ebene wieder angesiedelt sein könnte, nämlich z. B. im Bereich der Portale oder der anbietenden Bibliotheken selbst. Das wäre die Frage, ob man sozusagen diese Anlagerungsschicht an bestehende XML-Dokumente wirklich mit diesem XML-Dokument dann immer weiter verbindet und rumschickt und speichert, oder ob das getrennte Dinge sind. **I: Gut das wäre die Frage, wo es verortet wird...** B: Ja, wo es gespeichert wird. Oder ob TextGrid sozusagen in dem Sinne dann auch eine Portal-Funktion bekommt, weil es dieses ganzen Dinge sichtbar macht und anbietet und sozusagen in der äußeren Benutzung Werkzeug anbietet, um das zu annotieren. Aber das, finde ich, das ist eine andere Schicht als dieses unmittelbare Erarbeiten

und Verarbeiten von XML-Dokumenten. **I: Aber generell würden Sie da schon einen Bedarf sehen, jetzt egal wo es verortet ist?** B: Ja, sagen wir mal so: Es liegt im Trend der Zeit. Das ist eine viel diskutierte Sache. Und man muss abwarten, ob sich das als soziale Praxis etabliert. Es wird ja momentan viel dran geforscht und es ist natürlich schön, das auszuloten – wie das geht, was möglich ist, was für Probleme das mit sich bringt. Aber ob das als soziale Praxis in die Breite gehen wird, ob Menschen annotieren werden, das ist natürlich auch noch eine andere Frage. Und ich weiß nicht, ob man das abwarten muss, oder ob man das fördern soll oder ob man das experimentell begleiten soll. Das ist nicht so leicht. Ich sehe noch nicht, wo Geisteswissenschaftler in ihrer alltäglichen Arbeit massiv Dinge annotieren. Ich sehe das eher dann, wenn sie selbst ihr Projekt bearbeiten, kann man das ja auch als annotative Schichten modellieren. Aber dass dann die Community gegenseitig annotiert... – weiß ich nicht. Und dann könnte man auch noch unterscheiden, was für Sorten von Annotationen das sind. Wenn das sozusagen Erschließungsinformationen sind, also Identifikation von Objekten, Namen, Personen, Orten, das ist dann wieder was anderes, als wenn es um Kommentierung im klassischen Sinne geht, eine Anmerkung.

**I27-15#I: Aber Sie kommen immer wieder zu dem Punkt zurück, dass da sehr vieles an der Praxis der geisteswissenschaftlichen Arbeit bzw. auch der Einstellung des typischen Geisteswissenschaftlers dazu entsteht. Sie sehen darin also auch eine zentrale Hürde, dass da erst ein Umdenken bei den potentiellen Nutzern stattfinden muss, damit sich so etwas wie TextGrid oder eHumanities-Anwendungen allgemein überhaupt etablieren können, oder sehen Sie das anders?** B: Ja, deswegen glaube ich auch, dass die entscheidende Herausforderung für TextGrid ist, etwas zu schaffen, was für den traditionellen Geisteswissenschaftler unmittelbar und leicht benutzbar ist. Wenn man ihn da nicht abholt, dann wird man ihn nirgendwo hinführen. Und wenn TextGrid die Geisteswissenschaften irgendwie weiterentwickeln kann, in dem es die Leute irgendwo hinführt, dann muss es die Leute eben erst irgendwo abholen. Und da bin ich sozusagen, was die jetzige Konfiguration betrifft, so ein kleines bisschen skeptisch. Das ist genau wieder der Ausgangspunkt: Wenn man ein browser-basiertes Onlineding hätte, wo der klassische Professor mit drei Klicks sagen kann: Ich brauche hier dieses Dokument und ich weiß, dass es das digital gibt, und darauf möchte ich jetzt meine Transkription aufbauen. Und dann möchte ich mit meiner Transkription weiterarbeiten. Ich glaube, dann hätte man eine Chance, die Leute abzuholen. **I: Also da sehen Sie noch das größte Manko oder den größten Kritikpunkt, Schwachpunkt. Was gehört da noch dazu, wenn**

**man das fassen würde?** B: Ja das ist sozusagen die Einstiegshürde. Darin sehe ich das größte Problem. Im Moment zeigt sich das TextGridLab als eine sehr technisch spezialisierte Entwicklungsumgebung, d. h. sie ist sehr fern von dem, was der durchschnittliche Geisteswissenschaftler an Oberflächen kennt oder an Programmen kennt. Da sehe ich das wirklich große Problem. Wenn die Zielgruppe wirklich die ist, dass man längerfristige, breite Projekte unterstützen will, dann ist das ok, weil, die können diese Hürde nehmen. Aber sozusagen den „casual user“, den wird man damit nicht kriegen.

**I27-16#I: Gut und dem gegenübergestellt, was sehen Sie als den größten Fortschritt an, den TextGrid jetzt bietet?** B: Wenn das TextGridLab tatsächlich so funktioniert, dass ich sagen kann: Hier sind meine Bilder, hier mache ich meine Transkriptionen, da arbeite ich weiter daran, dann speichere ich sie hier. Es gibt Features, mit denen kollaboratives Arbeiten unterstützt wird, es gibt Features, mit denen Workflow mitoperationalisiert wird und ich habe die Möglichkeit, sozusagen direkt diese Bild-Text-Verzahnung zu haben und ich habe die Möglichkeit zu lemmatisieren und diese Lemmatisierungsinformation auch wirklich zurück schreiben zu lassen – daran scheiterte das ja noch in Frankfurt, ich weiß nicht, ob das inzwischen realisiert ist – dann ist das eine sehr gutes Tool für den Bereich der Edition, wo es in dem Bereich nämlich nicht sehr viele gute Tools gibt. Das wäre..., dann wäre es für die editorische Arbeit absolut benutzbar. **I: Aber da wären wir auch wieder bei TextGrid als Tool, als Arbeitsumgebung.**

**I27-17#Sehen Sie noch einen Fortschritt auf der Infrastrukturebene oder sehen Sie die als derzeit nicht so wichtig an, oder nicht vorhanden?** B: Gut, dass würde dann mehr auf den Bereich jetzt Informationsvermittlung und Portale zielen, würde ich denken. **I: Unter Umständen, also das was dahinter steht...** B: Das wäre dann außerhalb des Labs sozusagen. Also wenn TextGrid sozusagen vorgeschaltet auch noch eine browser-basierte Informationsebene hätte, wo man einfach sehr schnell und klar sehen könnte: Was ist drin,? Wo sind Tools? Was kann gemacht werden? Das fände ich sehr, sehr wichtig. **I: Ich meine damit aber auch das Repository, das dahinter steht.** B: Ja, aber wo wird das sichtbar? Das ist mir nicht ganz klar geworden? **I: Ja, ja gute Frage?** B: Weil, im Lab muss ich ja mir meine Ressourcen zusammen ziehen. Aber wo die sind und wie ich dran komme sehe ich im Lab ja erst mal nicht. D. h. wenn es flankierend eine Weboberfläche gäbe, wo ich sehr schnell mit drei Klicks zu allem hinbrowsen kann und sehen kann.; Ok, es gibt das und das und das. Dann habe ich einen ganz anderen Anreiz zu sagen: Ok, und das will ich im Lab weiter bearbeiten. Da fehlt mir sozusagen die wirklich überzeugende Oberfläche, die mal zeigt: Hey, pass mal auf, hier sind – weiß ich nicht – 5

Millionen Zeichen Volltext und 200.000 Seiten Handschriftenarchivalien und Drucke, mit denen man arbeiten könnte. Das ist natürlich die Frage. Das sind so Portalstrukturen, von denen ich nicht weiß, ob TextGrid die als Aufgabe ansieht oder nicht ansieht, weil das natürlich ein ganz eigenes Projekt ist und an solchen Projekten sind ja schon auch andere gescheitert. Gut, aber andererseits wäre es die Frage, ob... Ich denke man kann immer Projekte damit erfolgreich machen, dass man eine kritische Masse erreicht. Das ist ja auch der Zeno.org-Ansatz sozusagen jetzt in TextGrid. Wenn TextGrid wirklich vermitteln kann, was zur Verfügung steht, dann ist das auch ein wichtiger Baustein zu einem möglichen Erfolg. Denn jetzt in der Außenwahrnehmung wird TextGrid wahrgenommen als ein relativ großes Infrastrukturprojekt, das mit relativ viel Aufwand einen perspektivisch sehr ausgefuchsten Werkzeugkasten aufbaut und das möglicherweise Ressourcen zusammenbindet, die man aber nicht sieht. Ich will das jetzt nicht zu negativ darstellen, aber das ist meine Außenwahrnehmung. **I: Also das würden Sie derzeit eher noch als etwas, was fehlt oder was noch nicht gut umgesetzt ist einstufen und nur als möglichen Fortschritt, also so als Potential?** B: Ja, also mir persönlich... vielleicht habe ich nicht genug danach gesucht, aber mir ist nicht klar, wie ich die Inhalte von Zeno in TextGrid finde und benutze. Weil, auch die Website von TextGrid ist eine Projektseite, also da steht nirgendwo: Hier sind die Inhalte. D. h. man sieht, es ist ein Infrastrukturprojekt, ein Werkzeugprojekt, ein Entwicklungsprojekt, ein Communityprojekt. Aber es wirkt nicht wie ein Content-Projekt. **I: Aber da wäre durchaus Bedarf würden Sie sagen?** B: Das ist die Frage, wie TextGrid sich definiert. Denn TextGrid hat natürlich die beiden Optionen, zu sagen: Ja, wir sind auch ein Archiv; oder zu sagen: Nein, wir sind die Schnittstelle zu Archiven. Aber beides müsste transparenter sein. Also es ist ja nichts dagegen zu sagen, wenn TextGrid sagt: Die Daten werden von anderen bereitgestellt und auch von anderen aggregiert und sichtbar gemacht. Aber wir müssen ja einen Zugang dazu haben, denn sonst bleibt es ein reines Werkzeug, wo man sagt: Hier hast du das Werkzeug, die Inhalte musst du dir wo anders holen. Das kann mit Absicht sein, ich weiß es ja nicht? **I: Gut vielen Dank.**
