# Supplementary material
Source: publisher site journal article supplement (https://www.degruyterbrill.com/publication/isbn/9783110463927/downloadAsset/9783110463927_Interviews.zip)
Supplement: Supplementary file 21 [file I28.pdf › Interviews/I28.pdf]

**I28-1#Interviewer: Zunächst würde ich gerne wissen, wie Sie im Bereich E-Humanities arbeiten? Also wie würden Sie ihre Erfahrung einschätzen und wie können Sie ihre Tätigkeit beschreiben?**

Befragte/r: Ich bin von Hause aus Literaturwissenschaftler, habe aber außerdem hier an der Universität B Editionswissenschaft studiert. Mittlerweile ist das zum Masterstudiengang geadelt worden. Damals, als ich das gemacht habe, war das noch so ein Beifach, das man parallel zum Hauptstudium besuchen konnte. Und als Editionswissenschaftler, wie ich mich manchmal auch nenne, ist natürlich der Sprung in die eHumanities mittlerweile fast unvermeidlich. Ich arbeite ganz konkret an einem sehr umfangreichen Nachlass eines B Schriftstellers und Verlegers aus dem 18. Jahrhundert: N. Der hat einen immensen Nachlass von knapp 20.000 Briefen hinterlassen. Und um so einer Sache habhaft zu werden, kommt man natürlich mit konventionellen Editionsmethoden einfach nicht weiter. Es gab immer wieder Pläne, das zu stemmen, weil schon klar ist, dass das ein richtiges Bergwerk ist, das es noch auszubeuten gilt für die Forschung. Da sind wir mittlerweile an einem Projekt dran, wo wir eben hoffen, digital online das in die Finger zu kriegen. Von Vorteil ist da aus unserer Sicht vor allem eben die Möglichkeit, dass viele Mitarbeiter an ganz unterschiedlichen Orten an diesem Nachlass mitarbeiten können, also die Notwendigkeit natürlich nicht gegeben ist, wenn man die Sachen erstmal digitalisiert hat und online stellt, die Notwendigkeit nicht mehr gegeben ist, in die Staatsbibliothek zu gehen, um dann in den Nachlass direkt Einsicht zu nehmen. Das Tool, mit dem wir da gegenwärtig arbeiten, würde es dann auch erlauben, von außen her, also von verschiedenen Arbeitsplätzen aus, ähnlich wie TextGrid auch, dann direkt Eingaben vorzunehmen und so die Hoffnung dass irgendwann mal diese 20 000 Briefe dann mal ediert werden können. **I: Also diese Kollaborationsmöglichkeiten sind ganz wichtig, gerade in diesem Projekt, weil das an verschiedenen Orten auch angelegt ist und es verschiedene Standorte gibt, an denen gearbeitet wird. Oder wie ist das?** B: Ja, die Idee ist tatsächlich.. Also ich habe das jetzt in mittlerweile drei Seminaren mit Studenten erstmal erprobt. Also das Ganze ist noch in der Pilotphase. Der Vorzug ist einfach, dass die Leute zuhause an den eigenen PCs sitzen können, kriegen einen Zugang, einen Online-Zugang mit einem Passwort usw. und können dann direkt ihre Transkriptionen in dieses Tool eingeben anhand der Digitalisate, dass man eben transkribiert. Es gibt noch so eine Möglichkeit, das anhand von so ein paar Schlüsselbegriffen Eigennamen, Werk usw. zu indizieren, damit man irgendwie jenseits von einer Volltextsuche eben auch noch nach bestimmten Schlagworten suchen kann. Und das ist

eben alles möglich, ohne dass man nur an einem Ort arbeiten kann, wie das eben früher so war, wo es dieses eine Büro gab, mit den drei Editoren, die Tag für Tag so etwas unternommen haben. Das meinte ich damit.

**I28-2#I: Und was haben Sie sich dann von dem TextGrid-Workshop erwartet?** B: Ja, wie gesagt, wir arbeiten da mit einem Tool, das ist noch in der Pilotphase. Der TextGrid verspricht ja was Ähnliches und ist ja nun einfach so aufgestellt, dass man gegenwärtig den Eindruck hat, da sollte man sich da kundig machen, ob das nicht eigentlich eine Möglichkeit bietet, in irgendeiner Form anzudocken. Was ich mitbekommen habe in dem kleinen Workshop, es war ja aufgrund der begrenzten Zeit doch alles sehr kurz, sind ja bestimmte Ähnlichkeiten ganz klar gegeben. Und letztendlich wünscht man sich natürlich, dass das, was gegenwärtig in vielen Projekten, auf vielen Homepages, mit vielen unterschiedlichen Systemen entsteht, man wünscht sich ja eigentlich alles in einem großen System, wo dann alles miteinander vernetzt ist – und dieser große Traum dieses eigentlichen Internets, wo man durch ein paar Klicks alles greifbar hat. Vor diesem Hintergrund, bei Briefen ist es ja so augenscheinlich, dass man dieses Netzwerk von Korrespondenz, wovon ja immer die Rede ist, dass man das gerne auch verwirklicht hätte, was ja bis dato in gedruckter Form nie möglich war. Also man hatte immer den Brief...

**I28-3#I: Also auch den Briefverkehr praktisch zu erfassen?** B: Naja selbst... Ganz häufig... Man arbeitet mit Briefen und was da ediert ist, sind dann entweder bloße Briefwechsel x - y oder wenn man großes Glück hat, gibt es von x, weil x besonders wichtig war, und eben Lessing, Wieland, Goethe hieß, gibt es halt sämtliche Briefe an und von, aber selbst das ist natürlich sehr begrenzt. Da ist dann dieser eine Knotenpunkt Lessing dann gegeben, aber interessant ist ja nicht nur, was Lessing mit Eschenburg oder Lessing mit Klein geschrieben hat, sondern man möchte ja auch gleichzeitig wissen, was Klein mit Eschenburg geschrieben hat. Und wenn man das natürlich...da gibt es natürlich... Klein-Eschenburg glaube ich nun gerade nicht..., aber dann gibt es natürlich wiederum andere Editionen, die solche Ergänzungen möglich machen. Aber dann habe ich schon wieder zwei Editionen auf dem Schreibtisch liegen und gucke, wenn ich nach einem bestimmten Werk oder was auch immer schaue, gucke ich in zwei Register, wenn gute Register angelegt sind. Das wäre nämlich dann die nächste Frage. Und dieses ganze Netz, das man eigentlich hätte – Wer hat da eigentlich mit wem korrespondiert? – da wäre jetzt, denke ich, gerade mit solchen digitalen Editionen die Möglichkeit, das wirklich mehr oder weniger nachvollziehbar zu machen, um dieser Sache habhaft zu werden. Und das wäre, denk ich, gerade

was jetzt dieses Thema Printedition betrifft, ein immenser Fortschritt im Vergleich zu konventioneller Edition.

**I28-4#I: Und das Stichwort „andocken“, das kann man ja unterschiedlich verstehen. Also wie würden Sie sich das vorstellen, wenn das System, so wie es jetzt geplant ist, besteht, dieses Angebot TextGrid?** B: Naja, es sind zwei unterschiedliche Herangehensweisen für mich jetzt. Also einerseits: Ich als Editor hätte gerne eine Plattform, wo ich meine Edition nicht als Solitär stehen habe, sondern eben Vernetzungsmöglichkeiten habe mit anderen Editionen. Und gleichzeitig wünsche ich mir natürlich als nicht edierender Wissenschaftler, der ich ja nebenher meistens auch noch bin, genau den Komfort dieser vernetzten Editionen, die es mir dann möglich machen, nicht den Büchern hinterher zu laufen, sondern mehrere Sachen gleich in den nötigen Verästelungen vor mir liegen zu haben.

**I28-5#I: Welchen Eindruck hatten Sie denn jetzt nach dem Workshop? Also wie fanden Sie TextGrid, so wie Sie es jetzt kennengelernt haben? Einerseits die Idee, andererseits was bisher umgesetzt ist?** B: Na, von der Idee, das hören Sie jetzt schon raus, bin ich natürlich begeistert und schwärme davon. Bis dato scheint man ja noch nicht allzu viel machen zu können auf TextGrid, habe ich den Eindruck, ne? Da war glaube ich auch bei der gesamten Mannschaft in diesem kleinen Workshop schon so ein bisschen die Enttäuschung, dass man irgendwie da glaubte, man müsste da jetzt das „Non plus ultra“ gezeigt bekommen und würde sich dann am nächsten Tag hinsetzen und alles sowieso nur noch auf TextGrid machen, weil das so großartig ist. Und dann war so ein bisschen die Enttäuschung, na ja, das klingt alles ganz hoffnungsfroh, aber so richtig loslegen kann man damit jetzt noch nicht. Aber, Gott, das Kind steckt halt noch in seinen Kinderschuhen. Es wirkt immer durch die doch sehr breite Präsenz von TextGrid mittlerweile so, als sei es schon sehr weit, aber es ist eben doch noch so, dass das ganz klar ist, da ist jetzt ganz viel Arbeit zu leisten. Ja, insofern so ein bisschen ambivalent.

**I28-6#I: Mal abgesehen von den Funktionen, die noch nicht ganz funktionieren. Gibt es Funktionen, die Ihnen da noch fehlen? Man konnte ja schon absehen, welche dann mal funktionieren sollen. Gibt es da welche, die Sie für wichtig halten, die da jetzt noch nicht drin sind?** B: Also, da muss ich jetzt vorsichtig antworten, weil es ist jetzt auch schon wieder ein halbes Jahr her. Ich hab es jetzt gar nicht mehr so präsent. Meine Erwartungen waren jetzt auch so ein bisschen in die Richtung, dass es mehr Möglichkeiten gibt, wo mir automatisch Verlinkungen, Indizierungen oder so angeboten werden. Ich hatte so ein bisschen den Eindruck, TextGrid, wie es gegenwärtig noch angelegt ist, da würde ich eigentlich so arbeiten, wie ich das

bisher auch immer machen musste, sozusagen einen Quelltext letztlich schreiben. Und meine Hoffnung war tatsächlich, es ginge in so eine „What you see is what you get“-Richtung, also wo man komfortabel wie in einem Textverarbeitungsprogramm arbeitet und im Hintergrund entsteht der Quellcode. Solche Ansätze gibt es ja. Das wäre, wenn das in diese Richtung liefe, auch der große Vorzug, um möglichst viele Leute mit einzubinden. Also, so ist es, wie es jetzt angelegt ist, scheint es mir ja doch wieder auf so eine Informatik-Klientel irgendwie zu zulaufen. Deswegen vielleicht auch so die Irritationen bei dem einen oder anderen in dem Workshop, die sich da wirklich auch etwas anderes erwartet hatten, auch durch die Gespräche, die wir dann später in der Mensa geführt haben. Ja, und wenn das eben benutzerfreundlich, benutzerfreundlich ist eigentlich auch ein ganz schöner Ausdruck, wenn es tatsächlich auf so ein niedrigeres Level geführt würde, dass man das intuitiver bedienen könnte, das wäre natürlich ein immenser Vorzug. Also, dann könnte man eben Leute, die ansonsten mit Internet wirklich nicht mehr zu tun haben als Adressen eingeben und dann klicken, dann könnte man die trotzdem noch erreichen. Das wäre, denk ich, für den Einsteiger besser und denke ich für viele, die jetzt schon lange editorisch tätig sind, aber sich in so was nicht mehr einarbeiten werden. **I: Ja, also Benutzerfreundlichkeit wäre in dem Fall zu verbessern, in der Hinsicht, für weniger affine...?** B: Ja also Benutzerfreundlichkeit ist so ein bisschen... Ich glaube für den kundigen Nutzer ist das schon alles ganz optimal oder ziemlich gut eingerichtet. Es geht mehr darum, wie breit man sozusagen Publikum erreichen möchte. Ich meine, das Ganze ist natürlich..., dass man sagt: In 10 bis 20 Jahren sind das Sachen, dann hat das jeder drauf mehr oder weniger. Ist jetzt natürlich schwer zu beurteilen.

**I28-7#I: Klar. Welche Bedeutung messen Sie der Möglichkeit zu, das Ganze an die eigene Arbeitsweise anzupassen? Also Individualisierungsmöglichkeiten und Anschlussmöglichkeiten?** B: Auch eine schwierige Frage. Also, wie wahrscheinlich ist das, das kann ich gar nicht so wirklich beantworten? Ich halte das für äußerst wünschenswert. **I: Nein, die Bedeutung, würde ich gern..., die Sie dem Ganzen zu messen, die Sie diesem Aspekt zu messen.** B: Ja, das ist wahrscheinlich so ein einerseits – andererseits. Ich bin mir im Unklaren, inwieweit man die Sachen den Wünschen individuell anpassen kann und die Sachen aber noch so... Ich meine, wir haben ja das Problem bis dato in der Editionswissenschaft immer gehabt. Da wird ediert und immer präziser und detailreicher ediert, und es entstehen dann aber dadurch Editionen, in die man sich als Nutzer aber erstmal richtig einarbeiten muss, weil man diese diakritischen Zeichen nicht kennt und sich fragt, was dieses Zeichen eigentlich heißen soll. Das hat natürlich zur Folge, wenn man das jetzt TextGrid-ähnlich macht und alle schmeißen da ihre

Editionen rein und alle sind aber so ganz grundverschieden. Berechtigt ist natürlich, dass die Editoren sagen, ich kann es nicht anders machen, ich muss es so machen und was ich da an Texten, an Überlieferungen habe, das ist so individuell, ich brauche da eben meine ganz individuellen Darstellungsformen – sehr berechtigt, aber im Gegenzug heißt das natürlich immer, es wird Nutzer geben, die die Sache in die Ecke schmeißen und sagen, ich möchte jetzt bitteschön wieder meinen klassischen Fließtext haben, der reicht mir, auch für meine wissenschaftliche Arbeit. Und es wird natürlich noch absurder, wenn das dann alles irgendwie auf einer einzelnen Adresse dann so zusammen kommt. Ich meine: Leute wie Herr J, die sind da ja sehr umarmend und fordern einen da sofort auf, wenn man etwas ediert, man soll doch auf TextGrid kommen. Aber damit wird es halt nicht getan sein, dass man alle Sachen einfach nur online stellt und dann entsteht doch noch eher, noch stärker die Erwartung von Nutzern, dass man sich da einmal rein denkt und dann kann man das auch alles nutzen. Und wenn es dann aber trotzdem weiter so ist, dass es trotzdem weiterhin dieses Kleinklein an unterschiedlichen Editionen bleibt. Wird auch schwer, das alles zu vernetzen, denke ich...

**I28-8#I: Und dann die Anpassbarkeit von der Arbeitsumgebung, jetzt mal abgesehen von der Edition und vielleicht der Art und Weise der Auszeichnung, sondern Individualisierbarkeit der Arbeitsumgebung oder auch Anschließbarkeit von Tools, mit denen man immer gearbeitet hat. Das wäre ja auch eine Möglichkeit. Wie ist das aus ihrer Sicht zu bewerten?** B: Das ist natürlich wunderbar, wenn man mit den Tools, mit denen man angefangen hat zu arbeiten, weiterarbeitet und sich nicht irgendwie umstellen muss und das trotzdem in TextGrid einfließen kann, wäre es ideal. Das, was ich gerade gesagt habe, kam ja sozusagen eher von der Nutzerseite. Für den Editor selbst, wie gesagt, wenn man nichts neu lernen muss, sondern so weiter machen kann wie bisher? Natürlich immer gerne. Wie weit das dann in TextGrid dann integrierbar ist, kann ich natürlich nicht einschätzen, das können Sie mir vielleicht sagen? **I: Auch nicht definitiv.**

**I28-9#Die Infrastruktur, die da hinten dran steht, die haben Sie ja schon thematisiert. Stichwort „andocken“. Welche Potentiale sehen Sie da im Sinne des Zugriffs auf Daten, aber auch der Speicherbarkeit von Daten?** B: Immense! Naja, die Hoffnung ist ja tatsächlich, die wir damit verbinden, dass wir diese Vielzahl von Editionen, die zu... Werken entstehen, die auf eine Art und Weise zugänglich haben, die nicht nur den Gang in die Bibliothek dann obsolet werden lassen, sondern eben auch das Suchen in Texten, die man ja schon allein, wenn sie als Volltext recherchierbar sind, schon in ganz anderer Weise zugänglich hat, als gedruckt, wo man

allenfalls einen guten Index hat. Auch da kann ich es wieder nicht so ganz einschätzen, was dann technische Formen betrifft. Ich nehme mal an, dass dann letztendlich die Editionen ja schon auf separaten Servern gespeichert bleiben müssen. TextGrid kann ja nicht den Megaserver im Hintergrund haben, wo alle Editionen dann gelagert sind, nehme ich an. Aber das sind jetzt wieder nur Vermutungen. Was da technisch möglich ist, das übersehe ich nicht wirklich.

**I28-10#I: Abgesehen von der technischen Seite, ergäbe das ja ein riesiges Netzwerk an Inhalten, an Editionen und allem, was dazu gehört. Wie stellen Sie sich vor, dass da eine Orientierung geschaffen werden kann? Das wäre ja dann schon das andere Problem, wie man sich da zurechtfindet?** B: Ja, auch jenseits von Editionen muss man natürlich fragen, wenn man im Netz schon ediert, möchte man auch, wenn es in die Kommentierung geht, nicht nur auf andere Editionen verweisen, sondern dann möchte man natürlich auch, naja nicht vielleicht auf Wikipedia-Artikel unbedingt verweisen, aber auf allerhand andere Dinge, die jetzt im Netz stehen. Diese ganze Digitalisierungsflut, die uns jetzt von Archiven und Bibliotheken her begegnet, da ist ja ein ungeheures Material online mittlerweile vorhanden. Ja, zumindest zur Kommentierung müsste man ja jederzeit verlinken. Wie man dann eine Ordnung und Zugänglichkeit garantiert... – mit guten Metasuchmaschinen. Ja, also tatsächlich läuft es darauf hinaus, dass man die Sachen in Metasuchmaschinen findet. Es ist ja letztendlich doch immer so ein... So ist halt wissenschaftliches Arbeiten. Früher ist man halt von einem Querverweis in einem Buch zum nächsten Artikel gelaufen, hat da wieder was entdeckt und musste dann eben sich den nächsten Artikel, das nächste Buch besorgen. Und jetzt geht es halt von Seite zu Seite und von Homepage zu Homepage und man darf nur den Weg nicht verlieren und muss wieder zurück finden, wo man eigentlich von ausgegangen ist. So sehr hat es sich letztendlich gar nicht geändert, das Arbeiten. Das ist wahrscheinlich gar nicht hilfreich, aber so schrecklich finde ich das immer gar nicht. Ein gewisser Reiz dieser Arbeit besteht doch auch einfach darin, dass man diese Fahrten verfolgt, das macht für mich auch den Charme des wissenschaftlichen Arbeitens aus. Das hat so was Detektivisches. Dass man mit einem Klick in einer Suchmaschine alles geordnet vor sich liegen hat, das geht halt nicht, aber das ist auch nicht schlimm.

**I28-11#I: Welche Möglichkeiten oder inwiefern sehen Sie denn Möglichkeiten zur Gewinnung wissenschaftlicher Erkenntnisse durch digital unterstütztes Arbeiten – also neue wissenschaftliche Erkenntnisse, die durch herkömmliche Methode vielleicht nicht zu gewinnen wären?** B: Naja, was ist eine wissenschaftliche Erkenntnis? Also, wenn ich jetzt mal an meine eigene Arbeit denke, ohne das Internet ist das ja gar nicht mehr denkbar. Bei allem...

Wenn ich einen Kommentar schreibe, dann ist ja mein erster Griff immer der zum Internet, um alles rauszufinden. Lateinische Zitate genauso wie irgendwelche obskuren Personen, die ich nicht kenne. Nun wurde diese meine Arbeit ja Jahre, Jahrzehnte, Jahrhunderte ohne das Internet gemacht, und es sind dabei gute Kommentare entstanden. Wie die Leute das damals gemacht haben? Länger geblättert, mehr gewusst? Schwer zu sagen, aber da sehe ich jetzt, dass sich jetzt da die wissenschaftliche Erkenntnis oder die wissenschaftliche Arbeit in irgendeiner Form ändert, rein durch die technische Möglichkeit, das sehe ich jetzt da nicht. Da sind meine Kommentare wirklich nur hoffentlich so gut wie manches, was im 19. Jahrhundert geschrieben worden ist. Vieles mag leichter zugänglich sein. Rein quantitativ mag das auch auf einen großen Zugang hinauslaufen. Aber dass da jetzt irgendwie so ein Quantensprung stattfinden würde, der uns in Galaxien vordringen lässt, die noch nie zuvor ein Mensch gesehen hat, das glaube ich ehrlich gesagt nicht.

**I28-12#I: Das wäre jetzt aus der Rechercheperspektive, also wäre jetzt Recherche für einen Kommentar auf dieser Ebene. Um auf die Ebene zurückzukehren, von der Sie ja auch ausgegangen sind, bei den Briefeditionen haben Sie ja von Möglichkeiten gesprochen, die vorher gar nicht denkbar wären. Das würde ich auch darunter verstehen, als Möglichkeit, neue wissenschaftliche Erkenntnisse zu gewinnen in dem Bereich, allein durch vielleicht Darstellungsmöglichkeiten oder ähnliches. Könnten Sie sich da was vorstellen aus ihrer Arbeit heraus?** B: Ja, also tatsächlich, Darstellungsmöglichkeiten mit Sicherheit gäbe es da einen Fortschritt oder ist da ein Fortschritt denkbar. Aber letztendlich heißt das, bessere Darstellung, natürlich, ist ja eigentlich auch quantitativ. Also ich werde mir..., was ich mir sonst aus mehreren Editionen zusammen suchen könnte habe ich dann irgendwie schon eher im Blick. Da jetzt zu spekulieren, ob es zu ganz neuen Einsichten kommen wird? Schwer abzuschätzen. Wäre wünschenswert. Kann ich nicht mehr sagen.

**I28-13#I: Bei dem Workshop, haben Sie da Funktionen kennengelernt, festgestellt, gesehen, die völlig neu für Sie waren – auch wenn Sie noch nicht, vielleicht nicht ganz funktioniert haben, also die Sie in anderen Softwareangeboten noch nicht oder noch nicht in der Form gesehen haben? Oder haben Sie alles in der Form schon wo anders gesehen?** B: Also die Frage kann ich, glaube ich, tatsächlich nicht beantworten. Dafür ist diese kurze Einführung schon zu lange her. Ich konnte mich jetzt nicht daran erinnern, dass da eine Funktion gewesen wäre, wo ich gedacht habe: Das ist ja genial, so was habe ich mir ja immer schon gewünscht. Aber ich würde es nicht ausschließen und einfach meinem Gedächtnis anheimstellen, dass ich das jetzt

vielleicht in einem halben Jahr schon wieder vergessen habe, müsste ich mir das noch mal anschauen.

**I28-14#I: Um ein konkretes Tool noch zu besprechen: Die Verknüpfung von Texten und Bildern wurde da vorgeführt, also ein Text-Bild-Link-Editor. Inwiefern ist der für Ihre Arbeit relevant, hatten Sie da schon etwas vergleichbares, um damit zu arbeiten?** B: Nein, etwas Vergleichbares kenne ich nicht. Schien mir jetzt allerdings auch nicht so, dass ich mir gedacht habe: Das muss ich haben. Wenn ich jetzt mit dem Tool, mit dem wir da für unsere N-Briefe arbeiten,... also da wäre das natürlich vorstellbar, also nicht in dem Tool, aber zumindest kann ich nachvollziehen, weil wir ja auch eine Digitalisierung und eine Transkription haben, dass so was einen gewissen Komfort darstellt. Aber gerade bei Briefen sind mir da... Ja, also wir transkribieren das halt linear runter und halten die Zeilenwechsel bei, also Digitalisat und Transkription, das kann man parallel lesen. Also jemand, der jetzt die Schrift nicht gut lesen kann, der kann das trotzdem anhand der Transkription verfolgen. Also da jetzt noch irgendeine Verlinkung zu machen zwischen den einzelnen Wörtern, das wäre ein sehr großer Aufwand und ich glaube zu niemandes Nutzen. Wie ich das jetzt in Erinnerung habe aus der Präsentation aus dem Workshop, kann ich mir das für komplexe Werkhandschriften gut vorstellen. Also gerade, wenn ich, na ja, so eine Seite mit vielen Durchstreichungen und Einfügungen am den Rand, Marginalien mir vorstelle, wenn das in einen halbwegs geordneten Text ediert wird und ich dann trotzdem die Möglichkeit habe, anhand dieser Links zu verfolgen, wo hat denn der Editor die Marginalien in den Text eingebaut und so. Da könnte das ganz praktisch sein. Das ist jetzt wirklich so eine Funktion, die ich sonst nicht kenne, wobei ich jetzt tatsächlich auch nicht mit hunderten verschiedenen Programmen schon gearbeitet hätte.

**I28-15#I: Wie sieht das denn eigentlich genau aus bei der Briefedition, in der Sie jetzt arbeiten? Wie wird das nachher dargestellt? Gerade auch die Briefwechsel und die Verbindung untereinander? Wie muss man sich das vorstellen? Wird da einfach nur ein Hinweis hingesetzt, von wem an wen und dann praktisch nebeneinander angelegt oder wie muss man sich das vorstellen? Also mit Briefedition hatte ich persönlich jetzt noch nicht so viel zu tun.** B: Naja, Sie haben trotzdem schon so ein paar Knackpunkte genannt. Da haben wir gegenwärtig noch nicht viel mit zu tun, weil wir uns bis dato noch mit dem Nachlass Ns beschränken, was eben sozusagen ein echter Nachlass ist, so wie N das tatsächlich mal hinterlassen und seinen Erben weitergegeben hat, die das dann irgendwann mal an die Staatsbibliothek bzw. an die damalige königliche Bibliothek gegeben haben. D. h. es sind



natürlich fast ausschließlich Briefe an N da. Die sind nach Korrespondenzpartnern geordnet, innerhalb der einzelnen Korrespondenzpartner dann chronologisch, aber ein Briefwechsel im eigentlichen Sinne findet nicht statt. Es sind halt tatsächlich..., also es gibt Fälle, wo die Briefe Ns an den jeweiligen Korrespondenzpartner erhalten sind, aber dann eben nicht in der Staatsbibliothek, sondern in irgendeiner anderen Bibliothek. Das ist so ein Knackpunkt, wo man sich, wenn man mal soweit sein sollte, halt tatsächlich auch mal überlegen muss, wie dann... Also gegenwärtig läuft es ja noch ein bisschen so bei solchen Digitalisierungsgeschichten, das ist dann die Institution, die die Beständen inne hat, die Bibliothek, das Archiv, wie auch immer, die dann auf ihrer Homepage die Digitalisate online stellt. Wir würden jetzt eben sagen, die Staatsbibliothek soll nicht nur die Digitalisate online stellen, sondern auch unsere Transkriptionen, diese Möglichkeit eben, diese Edition dann letztendlich. Die Frage wird sich natürlich irgendwann mal stellen, wenn man tatsächlich dann Briefwechsel mal machen möchte, oder eben alles, was N da an Briefen an ihn und von ihm hinterlassen hat, stellt sich einfach die Frage, wenn die Digitalisate auf anderen Servern von anderen Bibliotheken liegen, wie kommt das zueinander. Ich weiß nicht, ob sich TextGrid da auch in irgendeiner Form als Schnittstelle anbieten würde? Also die Geschichte ist natürlich die, dass die Bibliotheken, Archive diese Sachen natürlich auf ihrem Server behalten möchten und die natürlich nicht gern rausgeben. Aber das macht das so ein bisschen schwierig. Wie gesagt, das ist jetzt Zukunftsmusik, ich bin mir der Problematik bewusst, aber habe das bis dato immer so ein bisschen zur Seite geschoben, weil es eben gegenwärtig darum geht, noch diese 20000 Briefe, mit denen man da lang genug beschäftigt ist, erst mal in irgendeiner Form derer habhaft zu werden. Aber das ist natürlich eine Frage, die sich umso mehr natürlich auch stellt, wenn es um diese Netzwerkgeschichten geht. Das ist halt leichter, wenn man sich auf die Transkriptionen beschränkt. Aber sobald man die Digitalisate dazu haben möchte wird es wahrscheinlich haarig. Gibt es da bei TextGrid schon irgendwelche Überlegungen? **I: Ja bestimmt.**

**I28-16#Was wäre dann zusammengefasst der entscheidende Punkt, den Sie als Bedarf formulieren würden an solche Systeme wie TextGrid, an eHumanities-Unterstützung für ihre Arbeit – jetzt und auch vielleicht perspektivisch?** B: Gebt mir eine Plattform, wo ich mit meiner Arbeit möglichst nahtlos andocken kann oder mich möglichst nahtlos und mit wenig Aufwand integrieren kann und wo ich den maximalen Synergieeffekt durch Vernetzungen mit anderen Projekten gewinne. **I: Ja, das wäre jetzt auch gleichzeitig das, was sie als größten Fortschritt sehen würden, kann man das so sagen?** B: Ja, ja. **I: Was sehen Sie noch als das**

**größte Manko dann auf der anderen Seite bei TextGrid?** B: Naja, wie gesagt, wie schon erwähnt, das Ganze ist ja noch nicht soweit. Wenn ich jetzt einen Wunsch äußere, das ist natürlich schon so ein Traum, der weit in die Zukunft weist... Bei TextGrid sehe ich gegenwärtig eben die Diskrepanz aus diesen hohen Erwartungen, die einfach noch nicht so eingelöst werden können. Da kann man ja einfach nur sagen: „Auf geht’s!“ Muss mehr dran gearbeitet werden, aber das kann ich natürlich bequem hier im Sessel sitzend sagen. Ja, vielleicht was eine Möglichkeit bei TextGrid mir geleistet zu werden scheint, ist ja Arbeit mit möglichst flächendeckendem Publikum erreichen, der Versuch möglichst viele Leute dafür zu interessieren, solche Sachen wie diese Workshops, also das scheint ja in mehr als ausreichendem Maße betrieben zu werden. Mehr kann man da wahrscheinlich gar nicht tun, außer parallel dazu die Technik voranzutreiben. Denn das wird auch letztendlich die Leute von der Software überzeugen, oder eben nicht...? **I: Gut vielen Dank.**
