# Supplementary material
Source: publisher site journal article supplement (https://www.degruyterbrill.com/publication/isbn/9783110463927/downloadAsset/9783110463927_Interviews.zip)
Supplement: Supplementary file 22 [file I3.pdf › Interviews/I3.pdf]

**I3-1#Interviewer: Wie würden sie ihre EDV-philologische Erfahrung beschreiben?** Befragte/r: Die EDV-philologische...? **I: Ja. Im Umgang mit EDV-philologischen Anwendungen, ihre Tätigkeit und so weiter.** B: Was heißt denn EDV-philologisch? **I: EDV-gestützte philologische Arbeit.** B: Würde ich schon als sehr gut einschätzen. Also ich bin ja jetzt... Ich bin schon Philologin von der Ausbildung her. Ich habe damit aber eigentlich überhaupt nichts mehr zu tun. Sondern wenn, dann eher im EDV-Bereich für Philologen. Und... aber arbeite halt viel mit – also mit XML? **I: Ja.** B: Sowohl in normalen XML-Editoren, als auch im ganz einfachen schlichten Texteditor. Also dass ich dann Quelltext bearbeiten kann. Kann auch in gewisser Weise, ja, Programmiersprachen. Also ein bisschen programmieren. Also ich fühle mich da eigentlich fit. Aber ich kenne jetzt bei Weitem nicht alle Programme. Also es gibt ja einen, der unter Philologen relativ gut oder häufig verwendet wird. Das ist der CTE – Classical Text Editor. Aber mit dem habe ich zum Beispiel noch nicht gearbeitet. Ich weiß, dass es ihn gibt. Aber ich habe noch nicht mit ihm gearbeitet. Andererseits kenne ich zum Beispiel TUSTEP, was bei Philologen auch Brauch ist. Mag das nicht sehr gerne, aber ich kenne es. **I: Und was sind ihre konkreten Tätigkeiten? Also welche Bezüge zur EDV-Philologie haben sie in ihrer Arbeit? Wie sieht das genau aus? Können sie das beschreiben?** B: Also ich ringe ja so ein bisschen mit dem Begriff EDV-Philologie. **I: Ja. Gerne auch eine andere Beschreibung für: durch Informationstechnik gestütztes germanistisches Arbeiten, oder wie auch immer. Es geht nur um den Kontext.** B: Ja. **I: Also um die Beschreibung ihrer Tätigkeiten, um das einzuordnen.** B: Also philologisch selber arbeite ich nicht. Also Forschung und so, feilen an den Ressourcen, tue ich auch nicht. Ich bin eher dafür da, die Ressourcen zu bauen – oder herzustellen. Insofern habe ich mit dem kompletten Paket bei der Digitalisierung zu tun. Was davon anfängt, die Bücher in der Bibliothek zu bestellen, irgendeinen Arbeitsworkflow mir auszudenken, wie man die scannt, oder dass sie gescannt werden, in welcher Art sie gescannt werden, was da passiert, wo sie abgelegt werden, wie die Dateien benannt werden, dass es ein einheitliches Identifizierungsschema gibt und wie dann die Konvertierung abläuft, welches Zielformat wir haben wollen, wie man es macht. Ob man es eher über OCR macht, oder mehr über Volltexterfassung. Und. Also. Per Hand im taptilen Verfahren. Und zu gucken, was dann dabei rauskommt. Also zum einen, um unsere Studenten anzuleiten, zum anderen eben, um Verfahren auszudenken, wie der Workflow am besten, am schnellsten, am effektivsten vorangeht. Immer auch zu gucken, wenn es irgendwo hängt, wie man es optimieren kann. Und vor allem in der Konvertierung nach XML und zwar nach dem TEI-Standard.

Und da sitze ich halt vor den Dateien und gucke die mir an, was – wie die aussehen, was da an Besonderheiten drinsteckt und vor allem – das nimmt sehr viel Zeit ein – die Quellen sich anzuschauen, zu gucken: Wo sind die Besonderheiten oder die Schwierigkeiten? Und vor allem: Was macht man aus diesen Schwierigkeiten? Vor allem momentan: Wie macht man das mit TEI? Weil wir eben TEI verwenden und es jetzt noch nichts Besseres gibt. Aber vorstellbar wäre es, dass sich das irgendwann auch mal ändert. Insofern gucke ich immer, ja, auf die Dateien an sich selber drauf. Also auf die Quellen und nicht auf irgendeine Umgebung, wie die Quellen irgendwann einmal rausgespuckt werden, für bestimmte Fragestellungen.

**I3-2#I: Ja, also das kommt EDV-philologischer Arbeit, also dem was wir darunter verstehen, schon nah – als Bereich davon. Ja, nur weil sie sich mit dem Begriff jetzt nicht so sich anfreunden konnten. Gut. Das so vorab als Klärung ihres Hintergrundes. Wie war ihr Gesamteindruck des TextGrid-Lab nach dem Workshop?** B: Das fand ich eigentlich ganz gut.

Also ich fand es halt sehr nett organisiert. Also, ja, nicht dass da einfach welche zusammengesammelt wurden, sondern dass sich da wirklich Gedanken gemacht wurde, dass jeder seinen eigenen Platz hat. Dass das so vorbereitet war. Dass keiner bei dem anderen abgucken konnte, wir alle so schön getrennt saßen. **I: Ja.** B: Dass das auch mitgetrackt wurde, beziehungsweise sofort bemerkt wurde, wenn es nicht mitgetrackt wurde und dann die Entwickler da am Platz standen und sagten: Hier. Hier fehlt was. Das fand ich ganz gut. Ich fand auch ganz gut, dass es so, also erstmal so eine kleine Einführung gab. Das es dann... die Kaffeepausen sowieso, und so eine Aufgabe, oder diesen kleinen Aufgabenleitfaden. Allerdings kam ich bei ein zwei Sachen bei den Aufgaben nicht zurecht. Also da wusste ich nicht so richtig, was da jetzt Ziel war, was ich da jetzt machen sollte. Aber dafür fand ich dann das am Nachmittag wieder ganz gut. Da hab ich dann einfach so rumprobiert und alle möglichen Sachen einmal angeklickt und geguckt wo es geht und wo es nicht geht. Genau. Und dass dann am Ende auch noch mal so eine kurze Auswertung kam. Also das fand ich alles sehr professionell abgewickelt. **I: Und das Lab selbst? Wie war da ihr Gesamteindruck? Also die Forschungsumgebung praktisch.**

B: Ja. Naja. Also da hatte ich mir – mehr erwartet ist vielleicht falsch ausgedrückt. Also erstmal fand ich, konnte man sehen, dass da extrem viel Arbeit drinsteckt in so einem Ding. Aber ich fand bisweilen, dass vielleicht Arbeit an der falschen Stelle reingesteckt wurde. Also ich weiß auch, dass glaube ich TextGrid mit anderen Voraussetzungen gestartet ist, oder mit anderen Zielvorgaben. Das hatte ja Frau Rapp auch noch mal gesagt, dass sie eigentlich von Anfang an ein bisschen etwas anderes vorhatten. Und dann aber im Laufe der Fahrt sich das, die Zielvorstellung geändert hat. Ich fand also ein paar

Sachen schade, die noch nicht zu Ende programmiert wurden. Also dass ich zum Beispiel mein eigenes XML-Schema einbinden kann oder verwenden kann. Da tauchten ja allgemein auch bei allen so ein bisschen Probleme auf mit diesen ersten Metadaten, dass man immer irgendwelche Metadaten eingeben musste, wo ich mich frage: Wenn ich schon eine XML-Datei aufrufe, ob sich denn das Programm nicht selbst die passenden Metadaten rausziehen könnte. Und... also ich würde es zum Beispiel nicht als XML-Editor verwenden, so wie es momentan ist. Also da gibt es bequemere am Start. Und das hatte ich damals glaube ich auch schon gesagt gehabt, dass es eigentlich, also dass ich mir vorstelle, dass das TextGrid wirklich sehr viel mehr Chancen hätte wirklich genutzt zu werden, wenn man anstelle des von Hand dort hinein programmierten, also anstelle der von Hand reinprogrammierten Programme sich die eigenen Lieblingsprogramme dort andocken könnte. Also dass ich eben, wenn ich da auf XML-Editor klicke, nicht den TextGrid-Lab-XML-Editor bekomme, sondern meinen eigenen meiner Wahl. Oder das gleich für das Bildbearbeitungsprogramm, was es... es wurde ja dort nur vorgeführt, was es ja noch nicht gibt. **I: Ja dieser graphische Link...** B: Dieses. Genau. Dieses graphische Linking-Tool. Oder auch, das hatte Herr Jannidis gesagt, dass das ja noch eher gehen würde, wenn die Programme nicht Programme sind, sondern Services. Also wenn ich ... also es gibt ja da diesen Lemmatisierer, der da mit drinnen sitzt. Und wenn ich jetzt meinen eigenen Lemmatisierer verwenden wollen würde. Also das fände ich, also kann ich mir vorstellen, dass das irgendwie möglich ist. Also zwar habe ich da jetzt noch keinen Knopf gefunden gehabt, wo ich draufdrücke: Meine eigene Anwendung bitte jetzt. Oder mein eigenes Service einbinden. Also das, das... Ich fände es halt gut von der Idee, wenn man... wenn es eben dieses Zentrum, dieses zentrale Oberfläche, oder wie auch immer gibt und ich dann meine Komponenten da zusammenbinden kann. **I: Es gehört ja auch zum Konzept. Also als modulares Konzept ist es ja ursprünglich geplant gewesen. Also sehr wohl Schnittstellen, die so etwas ermöglichen sollen. Das wäre ihnen also besonders wichtig?** B: Ja. Also ich fand es ein bisschen schade, quasi bestimmt viel Energie darauf verschwendet... was heißt verschwendet, verwendet zu haben, um einen XML-Editor noch mal nachzubauen. Also ob man da nicht vielleicht irgendwo hätte, weiß ich nicht, kooperieren können mit Firmen, die das schon machen. Zum Beispiel.

**I3-3#I: Gut. Gab es irgendwelche Funktionen die neu waren für sie?** B: Naja. Diese Lemmatisierungsdingens da. Aber das kommt auch daher, dass ich ja keine Linguistin bin und damit eigentlich nicht so viel zu tun habe. Andererseits müsste ich damit auch wiederum fast zu tun haben, weil wir ja hier im beschwasterten Projekt ja auch solche Sachen machen. Da geht es, also

wir programmieren Tokenisierer und durchaus auch Lemmatisierer. Aber damit habe ich selbst halt nicht soviel zu tun. Aber ich weiß, dass es so etwas gibt und dass da so etwas programmiert wird. Ansonsten, dass man halt so Wörterbücher damit abfragen kann, das habe ich ja schon bei den diversen Filmen gesehen. Finde ich jetzt auch nicht so neu die Idee, dass man verschiedene Ressourcen unter einer Haube abfragen kann. Das ist zwar immer schwierig zu bewerkstelligen, weil alle in einem anderen Format vorliegen. Und bei den Wörterbüchern, die aus dem Haus Trier kommen, wird es ja noch relativ einheitlich sein, das Format. Davon gehe ich aus. Aber wenn das jetzt, so wie das gedacht ist, die verschiedensten Ressourcen von den unterschiedlichen, weiß ich nicht, Forschungsstellen in ganz Deutschland darunterfallen, stelle ich mir das sehr schwierig vor. Also wäre natürlich wünschenswert das alles mit einem Male abfragen zu können. Aber finde ich jetzt auch keine so spektakuläre Idee. **I: Was wäre für sie denn eine....**B: Wenn das so... Wenn das wirklich mal durchgeführt würde.

**I3-4#I: Ja. Was würden sie denn für eine spektakuläre Idee halten? Mit den Möglichkeiten, die es jetzt durch Grid gibt. Sie haben als Anmerkung in den Fragebogen geschrieben, sie hätten das Griddige, das eigentlich Griddige vermisst. Das fand ich ganz interessant. Was ist das für sie?** B: Ja. Naja. Das ist halt tatsächlich ein bisschen mehr die Zusammenarbeit und die Ressourcenaustauschbarkeit. Oder dass man dieses Ressourcenaustauschen... Also momentan ist es ja so, dass jeder irgendwo für sich sein eigenes Korpus baut, oder eigene Ressourcen zusammenstellt und die dann bei sich irgendwo anbietet. Mit denen GUIs, die man halt denkt, dass man die braucht und mit den entsprechenden Suchfeldern und so etwas. Also ich hatte eben ein bisschen mehr erwartet, das tatsächlich schon ein paar mehr Ressourcen zusammengespielt sind. Dass ich jetzt eben nicht nur in den drei Wörterbüchern suchen kann, sondern dass halt auch richtig Texte vorliegen. Also. Also eben nicht nur die Wörterbücher an sich, sondern auch, weiß ich nicht, das Heine-Portal oder keine Ahnung, der HyperNietzsche oder was eben nicht alles schon gibt. Also dass man da auch irgendwo so einen Knopf findet, so einen Adapter oder irgendwie so eine Schnittstelle, wo ich jetzt sehen kann: Hier könnte ich meinen Adapter reinbauen. Oder dass man selbst vielleicht so einen Baustein an die Hand bekommt, wo man sagt: Ich habe... Das ist das Zielformat. Dass ich das sehe, das TextGridzielformat. TextGrid setzt sich auch zum Ziel irgendwie so ein einheitliches Format zu bauen, wenn ich das richtig verstanden habe. Und ich habe hier meine Fassung. Und wie ich das aufeinander mappen kann. Also dass das nicht TextGrid macht, sondern dass vielleicht auch ich die Möglichkeit habe, weil ich ja meine Daten besser kenne. Wenn ich die da reinspiele, dass ich das sehe, wie ich das machen kann. Das hätte ich

gerne einmal ausprobiert, dass ich sozusagen meine eigenen Datenformate irgendwie auf das TextGridformat mappen kann. **I: Also wäre für sie besonders wichtig die Individualisierbarkeit und Anpassbarkeit des Ganzen an das was sie machen. Und auch, es war ihnen offenbar auch noch zu wenig vorhanden. Also zu leer. Also an Ressourcen auf die man zugreifen kann.** B: Ja. Ja. Was ja aber jetzt nicht unbedingt verwunderlich ist. Aber ...**I: Es ist halt auch eine Sache des Stadiums in dem das Ganze...**

I3-5#B: Ja. Ne. Es ist auch die Frage eben wie bereit die Gesellschaft oder die Gemeinschaft oder Community ist, die Daten da wirklich abzugeben. Also ich hatte auch irgendwann einmal Herrn Jannidis gefragt: Was ist denn, wenn ich meine Daten da reingespielt habe, aber irgendwann der Meinung bin: Ich will die gar nicht in TextGrid mehr hosten. Ich will die wieder heraushaben. Da gab es irgendwie keine zufriedenstellende Antwort. Da hieß es: Die werden dann quasi stillgelegt. Die bleiben drin, sind aber nicht mehr verfügbar. Aber das finde jetzt nun auch... Also dann möchte ich die wieder komplett gelöscht wissen, oder so. Auch wenn das jetzt erstmal nicht schön ist, das man sagt: Ja, ich will jetzt TextGrid doch nicht verwenden, wenn man es einmal ausprobiert hat. Aber eben gerade um es zu testen, würde ich ein paar Testdateien reinspielen. Nur möchte ich auch sicherstellen, dass die dann da wieder rauskommen, wenn die...**I: Ja. Das kann ich gut verstehen. Ich habe auch schon Testdateien erstellt, die immer noch da sind.** B: Aha.

**I3-6#I: Ja. Gut dann. Das wäre ja jetzt zum Beispiel ein Problem. Also dass es nicht, die Nichtlösbarkeit. Können sie noch ein paar Problemstellen nennen, die im Laufe des Workshops ihnen begegnet sind? An welchen Stellen hatten sie Probleme mit welchen Tools?** B: Ich muss mal kurz gucken, was es so gab. **I: Ja. Fällt ihnen was noch direkt ein? Was besonders problematisch war?** B: Ja. Also diese eine Sache mit dem Schema. Mit dem Speichern. Also mit dem Speichern gab es irgendwie Probleme. Und zwar habe ich halt immer Strg+S gedrückt, wie ich das andauernd tue. Ist quasi so ein Reflex. Und dann war es irgendwie im Nirvana verschwunden, oder... Also das fand ich nicht sehr intuitiv. Na dann, wie gesagt beim XML-Editor bestimmte Funktionen. Dass man den Kommentar nicht umschalten konnte. Diese Comment Toggle gab es noch nicht. Und dass ich nicht mein eigenes Schema erstellen kann bzw. mein eigenes Schema nicht hochladen kann. Dann diese Geschichte mit den, na... mit diesen Metadaten ganz am Anfang. Oder dass man verschiedene Daten als Datumsangabe eingeben musste. Dieses mit dem Gregorianischen und dem anderen. So etwas. Was war dann noch? Also was ich ja gut fand, war die Sache mit dem Projekthandling und dem..., also Rechtevergabe

an verschiedene Mitarbeiter. Ob die gucken dürfen, oder mitbearbeiten dürfen. **I: Also die Kooperationsmöglichkeiten.** B: Jetzt sind ja eine ganze Menge an Projekten inzwischen drin. **I: Ja.** B [schaut im TextGrid-Lab nach]: Ah, ja. Hier oben gab es ja einiges. TextGrid. Wörterbuchsuche. Dann Suche an sich. OK. Gut. Mit dem Lemmatisierer weiß ich jetzt nicht mehr so genau. Aber da kenne ich mich ohnehin nicht so richtig aus.

**I3-7#I: Nun. Ja klar. Aber sie haben ja schon einige Probleme genannt. Wie sind sie denn mit der Navigation allgemein zurechtgekommen? Mit der Organisation, Menüführung?** B: Also ich fand es am Anfang erst einmal unübersichtlich. So ein bisschen. Aber das ist jetzt zum Beispiel beim Oxygen-Editor erstmal nicht anders. Weil das Problem ist ja, wenn man so eine Software hat, die hoch konfigurierbar ist, dann ist erst einmal viel da, wo man gucken muss: Was brauche ich? Was brauche ich nicht? Was kann ich wieder wegschalten? Ja, mit diesen ganzen. Ja, ich habe erst einmal zu tun gehabt hier diese, hier oben... Ja? Wie heißt denn das? Diese Icons irgendwie zuzuordnen. Was ist, und dann... Es hat eine Weile gedauert um zu verinnerlichen: Ok. Ich habe ja die Komponenten. Das sind ja die verschiedenen Komponenten, oder Sichten. Wie auch immer man das nennt, für den Editor, für die Suche. Es war halt, ich glaube das hatte ich auch aufgeschrieben. Irgendwann kam es mir merkwürdig vor, wenn ich hier irgendwas gesucht hatte, oder wenn ich irgendetwas markiert hatte. Dann... Das hatte ich aber glaube ich auch aufgeschrieben. Das weiß ich nicht mehr ganz genau, dass ich in der Wörterbuchsuche etwas gesucht hatte und dann bei dem Ergebnis anfällt, etwas anderes erwartet hatte. Da war irgendwie etwas mit der Anzeige. War nicht so wie ich das erwartet hatte bei der Suche im Dictionaryresearch. **I: Ja, ich habe das gelesen. Da hatten sie einen Kommentar geschrieben. Und zwar: Das markierte Wort im Text konnte man ja per Wörterbuchsuche suchen. Da haben sie, glaube ich, angegeben, dass dann des Ergebnis des Lemmatisierers... nicht genau kam....** B: Ja. Ja. Also irgendein anderes Ergebnis war da plötzlich zu sehen. Was mich verwundert hatte. **I: Gut. Was halten sie denn davon, dass in dem Lab mehrere Möglichkeiten der Navigation gibt, die zum selben Ziel führen können? Dass man also praktisch auf mehreren Wegen....** B: Welche denn? Also das finde ich im Prinzip ganz gut. Aber jetzt weiß ich jetzt ... **I: Ist noch nicht so... Haben sie noch nicht so wahrgenommen. Also es gibt prinzipiell mehrere Möglichkeiten, mehrere Pfade zum selben Ziel zu kommen in...** B: Zum Beispiel? **I: Ja. Wenn ich ihnen das jetzt zeigen würde. Na, gut. Können wir das vielleicht nachher machen, weil das ist jetzt für die Aufnahme...** B: Ja. **I: ist das natürlich Leerlaufzeit. Aber ok. Also einfach vom Prinzip her: Finden sie das eher verwirrend, oder finden sie das eher gut** B: Also ich

finde das... Also sicherlich ist es am Anfang erst einmal verwirrend. Aber auf der anderen Seite finde ich das gut, weil jeder Nutzer hat ja irgendwie einen anderen Hintergrund wie er überhaupt zum Computer gekommen ist und geht eben andere Wege. Also so wie ich immer gut finde, ob, dass man a) im Menü klicken kann, b) dass es Shortcuts gibt und c) dass man, was weiß ich, keine Ahnung durch noch etwas Drittes irgendwie dahin kommt. Das finde ich schon ganz gut. Man sich dann seinen Weg und wird wahrscheinlich immer denselben gehen, der für einen am effektivsten ist. Aber den muss man ja erst einmal finden. Und das ist halt bei so einer komplexen Sache am Anfang immer erst einmal eine kleine Herausforderung.

**I3-8#I: Ja. Vor diesem Hintergrund: Wie würden sie die Bedienbarkeit und Erlernbarkeit insgesamt einschätzen?** B: So. Also erst einmal einen relativ hohen Sprung. Also es ist erst einmal ein relativ hohes... Wie sagt man denn? Eine steile Lernkurve gibt. Aber dann, wenn man es begriffen hat, wie das funktioniert, dann hat ... dann ist es in Ordnung. Also dann... Ja.

**I3-9#I: Ok. Jetzt mal weg von dem konkreten Lab...** B: Ja. **I: ... hin zum Thema eHumanities übergreifend. Ja, dieser Begriff ehumanities, was verbinden sie damit und wo sehen sie die Potentiale?** B: Also so richtig verbinden tue ich damit noch nichts. Also es gab ja in der Woche darauf in Göttingen so einen auch TextGridWorkshop oder nicht Workshop. **I: Ja, da war ich auch.** B: Wie auch immer. Da war ich aber nicht. Da ging es ja auch um eHumanities. Ah, nein, Quatsch. eScience. **I: Nein. eHumanities. Ja.** B: Aha. Genau. Ja. Was ich halt in letzter Zeit auch mit Kollegen diskutiert hatte, war eben dieser, dieser neue Begriff der eHumanities im Gegensatz zu Digital Humanities. Warum das jetzt auf einmal eHumanities heißt. Und wahrscheinlich ist das insgesamt noch ein bisschen weiter gefasst als Digital Humanities. **I: Ja. Also das e steht für enhanced. Also nicht für irgendwie ...** B: Also nicht für elektronisch, sondern für ... **I: Nein. Genau. Ja.** B: Enhanced. Was auch immer das dann heißt. **I: Ja.** B: Ja. Ich habe da eigentlich eher noch so eine Wolke an Vorstellungen, aber die ist jetzt erst einmal positiv besetzt. Auf gut Hoffnung, dass das durchaus die Geisteswissenschaften in ihrer Arbeit effektivieren kann. **I: Könnten sie vielleicht einige konkrete Punkte nennen? Was stellen sie sich da vor? Oder auch ruhig unter dem Begriff Digital-Humanities, wenn für sie da konkretere Vorstellungen damit verbunden sind.** B: Schwierig. Also zum einen fände ich das toll, wenn das tatsächlich dazu führen würde, dass man einfacher auf die Ressourcen zugreifen kann. Also dass die eben nicht alle so versteckt sind. Und dass nicht ein Portal neben dem anderen aus dem Boden schießt, wie es momentan ja ist. Sondern, dass man wirklich, sei es dezentral oder sei es zentral, aber relativ einfach und schlicht auf die verschiedenen Texte oder Dokumente zugreifen

kann. Und dass das auch nicht nur so textlastig ist, wie es im Moment ist. Oder zumindest arbeite ich ja eher im textlastigen Bereich. Sondern dass man auch einfacher quasi innerhalb der Medien switchen kann. Also zu Bildern und Tondokumenten. Und dass man auch die auf irgendeine Art und Weise annotieren kann, dass man die nicht einfach nur so angucken kann. Sondern dass man mit denen etwas machen kann, dass man in die eingreifen kann. Also dass man, genau, auf die Ressourcen nicht nur lesenden Zugriff hat, sondern auch annotierenden, schreibenden, wie auch immer. **I: Ja.** B: Also dass man nicht für sich in seinem Büro forscht und dann sein Paper eines nach dem anderen schreibt, sondern dass man auch richtig quasi seine eigenen Forschungsergebnisse bei den anderen andocken kann. Das wäre so eine Sache.

I3-10#Oder dass man tatsächlich ... Dass tatsächlich die Geisteswissenschaften auch noch mehr mit Naturwissenschaften zusammenarbeiten, um, ja, um neue Wege zu gehen. Also ein Beispiel wäre von dem ich letztens gehört habe, ist eben die Werkstoffanalyse von historischen Beschreibmaterialien. Also dass man dann mit, weiß ich nicht, mit irgendwelchen Spektrometern draufgeht. Also wird ja zum Teil auch schon gemacht, um zu gucken: was steht denn darunter, oder woraus kann ich anhand der unterschiedlichen Tinten erkennen, um welchen Schreiber es sich handelt. Also, dass da sozusagen Chemie hereinkommt und Physik mit diesen Hyperspektralanalysen, um geisteswissenschaftliche Fragestellungen besser beantworten zu können. Also dass sozusagen aus dieser reinen Papierwissenschaft, dass die irgendwie ein bisschen... **I: Ja.** B: Aber ob das jetzt nun zu eScience gehört? **I: Ja. Wo könnten denn da die Mehrwerte geschaffen werden, wenn sie sagen, beispielsweise: Zusammenarbeit zwischen Naturwissenschaft wie Chemie, jetzt in dem Kontext und einer Geisteswissenschaft? Dann wäre das ja prinzipiell auch möglich ohne eine digitale Verstärkung.** B: Naja. Also sie ist ja insofern digital, als dass diese ganzen Hilfsmittel oder Arbeitsmittel ja digital funktionieren. Also dazu braucht man ja, weiß ich nicht, Strom, Elektronik. Oder auch... Ich habe gerade eine Mail von Frau Rapp bekommen, wo es eben auch um Verfahren geht aus der Biologie. Also DNA-Analyse für Korpusfragen. Dafür braucht man ja... muss es ja auch irgendwie elektronisch sein.

**I3-11#I: Was sehen sie denn noch für Möglichkeiten, also mittels dieser technischen Möglichkeiten, IT-basiert wissenschaftliche Erkenntnisse zu gewinnen, die man vielleicht Offline nicht oder kaum gewinnen könnte?** B: Ach, na da gibt es Einiges. Also da muss man halt einfach versuchen quer zu denken. Also was wir hier schon einmal dazu gemacht hatten, was jetzt zum Beispiel mit einem papiernen Wörterbuch nicht möglich ist, ist zu gucken, wenn es ein Belegwörterbuch ist, aus welchen Belegen dieses gesamte Wörterbuch besteht. Also dass man



halt dadurch, wenn es elektronisch und strukturiert aufbereitet ist, dass ich mir das sozusagen quellenorientiert wieder ausgeben lassen kann. Das Wörterbuch. Dass ich das ganz anders sortiert herausbekomme. Dass ich ganz andere Fragestellungen stellen kann, die ich jetzt mit einem Papierwörterbuch überhaupt nicht machen kann. **I: Ja, wenn... Wird also dann eine Struktur sichtbar gemacht, ...** B: Ja. Also das betrifft halt auch...**I:... die jetzt konventionell nicht...** B: Genau. Ja. Also das lässt sich an einem Wörterbuch schön durchexerzieren, weil das ja von sich aus schon ein sehr tief strukturierter Dokumententyp ist. Und wenn man den dann elektronisch auch fein so durchstrukturiert, entweder retrodigitalisiert, oder überhaupt, wenn man überhaupt ein neues Wörterbuch beginnt, also von vorneherein, das nicht nur drucktechnisch, also layoutmäßig die Unterschiede kenntlich macht, sondern semantisch. Dann, dann wäre das toll. Stimmt, da fällt mir auch ein: Semantik, semantisches Web, Ontologien und so etwas. Das gehört da bestimmt auch noch mit dazu. **I: Ja. Gut. In der Richtung gibt es ja schon Einiges. Haben sie da selber mit zu tun? Mit solchen Dingen?**

**I3-12#Oder sind sie eigentlich mehr nur mit Digitalisierung generell jetzt...?** B: Nein. Also im Moment jetzt hier in meinem Arbeitsgebiet bin ich eher nur mit Digitalisierung beschäftigt, beziehungsweise schon mit dem Nachdenken darüber, wie können wir... Also wir haben ja ein bestimmtes Programm zu erfüllen. Wie können wir aber trotz dieses straffen Zeitprogramms relativ viel Struktur den Texten mitgeben, die wir hier digitalisieren. **I: Insofern ist das ja für sie durchaus auch relevant.** B: Ja. **I: Also die Möglichkeiten, die sich dadurch bieten würden, auch was jetzt... Gut. Es ist ja einerseits Forschungssache, wenn man sagt: wissenschaftliche Erkenntnisse durch IT-basiertes Arbeiten, andererseits aber ja auch eine Frage der Infrastruktur und auch der, bei Digitalisierung, der Strukturierung generell, der Daten. Also eher etwas, was die Verwaltung der Daten auch angeht. Oder?** B: Was ist jetzt die Frage? **I: Ja. Ich wollte damit nur genauer erfahren, wie, was für sie dabei die wichtigste Rolle spielt. Jetzt für ihre Arbeit.** B: Also momentan spielt für mich die wichtigste Rolle bei der Arbeit jetzt tatsächlich dieses Informationen reinbringen in die Texte, die offensichtlich da sind, aber die nur vom Druckbild erst einmal da sind, damit ich später andere Fragestellungen stellen kann, als auf den bloßen Text auf Papier. Das ist im Moment für mich, für meine konkrete Arbeit hier das Wichtigste.

**I3-13#I: Wenn man jetzt... Es geht ja auch um digitale Infrastruktur bei TextGrid. Man kann das beispielsweise auf die Formel bringen: Vernetzung von Inhalten, aber auch Vernetzung von Arbeitsprozessen. Über Schnittstellen von Tools, aber auch vernetzte Projekte,**

**Zusammenarbeit zwischen verschiedenen Stellen, Forschern, wie auch immer. Wo sehen sie die Potentiale in der Vernetzung von Arbeitsprozessen, also in der Kooperation?** B: Da gibt es eigentlich viel Potential. Also ganz einfach schon im Austausch dessen, wie man das macht, also wie man das angeht. Schon ganz einfach der allererste Schritt. Wenn ich jetzt eine Digitalisierungsinstitution bin und etwas digitalisieren möchte, was ich aber nicht besitze. Dieser ganze Kommunikationsprozess mit den Bibliotheken, der ist zum Teil sehr langwierig. Da wäre es halt schön, wenn es quasi so eine Mustervorlage gäbe oder ein Mustervorgehen, was sowohl die digitalisierende Institution als auch die Bibliothek kennen und die wissen: Ah, da kommt jemand, der klingelt dort. Ok. Dann geht das rasch durch und man bekommt die ganzen, also, Rechte. Also das dauert ja vor allem lange, diese Diskussion um die Rechte. Wem gehören hinterher die digitalen Images von den Büchern, die digitalisiert werden. Also dass schon da bei dem allerersten Schritt, dass man da anfangen könnte, ja, wäre das toll, wenn das sozusagen, wenn es eine einheitliche Vorlage gibt, die allen bekannt ist. Genau das gleiche mit: Was macht man mit bestimmten Textvorlagen? Also da sehe ich an verschiedensten Stellen Austausch. Wobei man auch nicht immer alles über einen Kamm scheren kann. Also die Texte, die es halt gibt, wenn man jetzt davon ausgeht... Also in diesem einen Gebiet Texte zu retrodigitalisieren, oder überhaupt zu digitalisieren, haben alle Texte ihre eigenen Besonderheiten, über die man immer wieder gesondert nachdenken muss. Aber schön wäre es, wenn es irgendwo so einen Pool gäbe, wo man meinetwegen nachgucken könnte. Das und das mache ich jetzt mit irgendwelchen, also mit bestimmten Spezialfällen. Das würde bestimmte Sachen vielleicht, also schneller machen. Andererseits gibt es da ja, also wenn man sich jetzt dafür entschließt, dass eben in TEI XML zu kodieren, gibt es ja die TEI -Mailingliste, wo man dann auch schon Hinweise findet. Aber es ist trotzdem noch hin und wieder mühsam und es bedarf immer wieder des eigenen Nachdenkens, wie man es macht. Und eben immer wieder für die eigenen Zielvorstellungen oder Zielvorgaben, die man jetzt hat. Aber ...**I: Das waren ja jetzt mehr Kommunikationsmöglichkeiten.** B: Ja. Genau.

**I3-14#I: Gut. Die sind ja eigentlich auch schon im Internet praktisch vorhanden. Also könnte man ja da auch als gemeinsame Plattform... Aber wenn wir jetzt einmal noch mal auf das griddige...**B: Ja. **I: ... eingehen, dann wären ja Kooperationsmöglichkeiten da, die darüber hinausgehen, über die reine Kommunikation.** B: Ja. **I: Was stellen sie sich aus ihrer Perspektive da vor? Oder was halten sie da für möglich oder besonders nützlich?** B: Naja. Also zum einen, wie gesagt, wenn die Kommunikation stimmt und wenn man bestimmte Übereinkünfte über Formate hat, dass man natürlich auch die Arbeitsmittel zu diesen Formaten sich

austauschen kann. Dass es eben... Aber das ist glaube ich Utopie, dass das irgendwie passt. Dass der eine so ein Skript da und dafür hat und der andere kann das dann einfach verwenden, weil es immer anders aussieht. Naja gut. Dann diese ganze Geschichte mit der Datenvorhaltung. Also das ist ja auch ein Thema was immer, also momentan, glaube ich noch ergebnislos diskutiert wird, die Langzeitverfügbarkeit und die Langzeitarchivierung. Also das sind ja zwei verschiedene Sachen, von Daten. In dem Zuge auch das Problem des Zitierens von elektronischen Quellen und Ressourcen, die irgendwo herumwabern. Dass man da irgendwie gerne persistente Adressierung haben möchte. Aber was ist, wenn meine Quelle ständig wieder geupdatet wird? Oder wenn ich eine Quelle habe, die meinetwegen von mir kommt, ich mir aber wünsche, dass, wie ich vorhin gesagt habe, ein anderer Forscher seinen Input dazutun kann. Wie stelle ich jetzt sicher – wen zitiere ich da jetzt? Zitiere ich da jetzt das Deutsche Textarchiv als den Quellengeber, oder zitiere ich da noch den Forscher, der seinen Input dazugegeben hat? Also so, über solche Sachen, wenn es da irgendwie Lösungen gäbe? Das wäre irgendwie toll. Ja. **I: Ok.** B: Also zumindest sind das Probleme die mir so einfallen. **I: Ja.** B: Die vielleicht im Rahmen einer gesamt vernetzten Infrastruktur irgendwie eine Lösung bieten könnten.

**I3-15#I: Gut. Ja dann einfach zum Abschluss noch. Was sehen sie als den größten Fortschritt bei der TextGrid-Idee? Jetzt war das ja natürlich eine Betaversion mit vielen Fehlern. Und wo sehen sie das größte Manko noch? Kurz auf einen Nenner gebracht.** B: Na irgendwie scheint es mir noch zu sehr, ja, textverhaftet. Oder es erscheint mir noch zu klein fokussiert. Also so, dass ich jetzt eben da sitze, ich meine nur diesen Editor habe, um dann in den, in dieses TextGrid-Lab an sich. Aber TextGrid hat vielleicht auch noch andere Komponenten. Also außerhalb des Labs, wofür jetzt eben die letzten Fragen wahrscheinlich standen. Ja. Also Manko, dass es etwas kleineres geworden ist im Ziel als das, was es am Anfang sozusagen als Idee herumschwirrte. Und als Perspektive, oder als Positives oder was man als Chance... ist eben tatsächlich, dass es vielleicht... also es wäre jetzt schön, wenn es eher diesen Repositoriumscharakter weiter ausbauen könnte. Oder dieses... Oder diesen Schnittstellencharakter, dass ich verschiedene Ausgangsformate, die überall irgendwo rumliegen, dass ich die habe und dass ich die relativ problemlos gebündelt bekomme durch verschiedene Adapter oder Matchingsgeschichten. Und dass...Ja. Ob das jetzt nun TextGrid ist oder irgendein anderes Digital Humanities, eScience-Zusammenschluss. Dass man tatsächlich mehr Bescheid weiß, wer was macht. Und wer wirklich was macht und wer es wie macht. Dass man also a) eine bessere Übersicht hat über die verschiedensten Projekte, also bessere sozusagen, ja, noch Kommunikationsplattform. Und auch

eine Vereinheitlichung irgendwie in den Formaten. **I: Gut. Ok. Dann vielen Dank.** B: Bitte-schön.
