# Supplementary material
Source: publisher site journal article supplement (https://www.degruyterbrill.com/publication/isbn/9783110463927/downloadAsset/9783110463927_Interviews.zip)
Supplement: Supplementary file 23 [file I4.pdf › Interviews/I4.pdf]

I4:

**I4-1#Interviewer: Gut. Ja. Zunächst einmal würde ich gerne wissen, wie sie ihre Erfahrung im Kontext von EDV-Philologie beschreiben würden? Was machen sie in dem Bereich?**

**Wo... Inwiefern kennen sie sich da aus?** Befragte/r: Ja, das ist schwer, da eine richtige Linie zu finden. Also ich kann es ja vielleicht so anfangen, dass also Mitte der 80er Jahre, als ich meine Magisterarbeit geschrieben habe, die habe ich noch mit einer Kugelschreibmaschine geschrieben und meine Diss im Anschluss dann hab ich mit TUSTEP gemacht. Das heißt also: Ich bin praktisch von Null auf TUSTEP gegangen und habe aber parallel auch Word Perfect natürlich gekannt und damit auch gearbeitet. Word dann auch ja, so bis... Also das war einfach unabdingbar, wenn man sowohl an der Uni gearbeitet hat als auch im Privatbereich, kommt man halt ohne normales, sage ich mal, Textverarbeitungsprogramm nicht aus. Und äh, ja. Also ich interessiere mich für EDV, versuche auch so bei den aktuellen Entwicklungen irgendwie auf dem Laufenden zu bleiben, aber habe, sage ich mal, grundsätzlich keine Ahnung von irgendwelchen Programmiersprachen, sondern lerne dann immer nur programmbezogen. Also mit TUSTEP kann ich einigermaßen umgehen, mache da alles was ich brauche damit und denke auch, dass ich auch in dem Bereich Officeprogramme mich einigermaßen auskenne. Also, so auf der Ebene von Dokumentvorlagen und so. Also ich habe auch schon Bücher mit Word gemacht, aber ungern. So, vielleicht reicht das als Einstieg.

**I4-2#I: Könnten sie denn kurz beschreiben, was sie machen? Einfach als ...** B: Na ja, gelernt habe ich TUSTEP, weil ich eine Edition gemacht habe. Eine Edition eines frühneuzeitlichen Pilgerreisetextes, der in drei Handschriften überliefert ist. Also eine Edition mit kritischem Apparat. Und habe dann parallel dazu in einem Projekt an der U bei den Rechtswissenschaften angefangen zu arbeiten – auch in einem Editionsprojekt, wo es um die Edition von Rechtsurkunden ging. Und habe da dann auch mit TUSTEP ein, ja, ein, oder mehrere Projekte betreut. Und leider ist nur eins davon dann letztlich bislang im Druck erschienen. Mehrere sind kurz davor. Also hauptsächlich im Editionsbereich. Aber eben auch für, weiß nicht, andere Projekte habe ich dann Registererstellung oder Satzvorlagen mit TUSTEP gemacht. Also wo man dann also auch schon früh ein Berliner Projekt, Repertorien zur Eheliteratur. Da habe ich die Register dann gemacht. Die hatten das mit Word Perfect halt erstellt und dann wurden die registerrelevanten Daten da herausgezogen, mit TUSTEP sortiert und dann wieder als rtf herausgegeben. Also praktisch alle möglichen Hilfsleistungen. Also Registererstellung, Apparaterstellung usw. Und auch jetzt hier in dem Projekt machen wir es so, dass wir, dass die

Kolleginnen in der Regel mit Word arbeiten. Dass auch der erste Band, ein Tagungsband, den wir hier erstellt haben, der wurde auch praktisch bis zum Schluss, waren die Daten immer in Word und wurden auch mit Word gepflegt. Wurden dann aber in XML konvertiert. Dann mit TUSTEP gesetzt. Also, dass man so diese Übernahme von Daten... wird hier gemacht. Und das, denke ich mir, ist auch ganz sinnvoll. Man muss ja nicht immer alles auf der Programmebene von TUSTEP machen. Und wir planen auch unsere weiteren Sachen... Also wir haben... müssen Textvergleiche machen zwischen deutschsprachigen und fremdsprachigen Rechtstexten, also sprich: polnischen, tschechischen, lateinischen, russischen... Und da werden wir auch immer, oder da machen wir im Augenblick die Texteingabe in TUSTEP. Und dann die Auswertung auch in TUSTEP. Aber geplant ist das alles, dass es zum einen in eine Satzausgabe mündet, zum anderen aber auch, so steht es auch in den Projektanträgen, dass man Ergebnisse auch im Netz präsentieren soll. So dass ich auch gleichzeitig an einer Präsentationsplattform im Netz arbeite, von der bislang aber nur die Bibliographie schon vorhanden ist. Also wir haben eine Bibliographie, die auch über ein Internet, oder nein, über eine Browserschnittstelle tustepkompatible Daten erzeugt, über so eine CGI-BIN Anwendung. Und das funktioniert dann halt auch ganz prima. Und da sollen halt diese anderen Module noch eingefügt werden. Also da wird noch ein Wortverzeichnis der Rechtstermini dazukommen. Dann sollen auch Textteile dort drin sein und auch teilweise die Auswertungen und eben dann nicht statisch als PDFs irgendwie einfach ins Netz getan werden. Sondern das soll halt eine dynamische Oberfläche sein, wo die Sachen auch untereinander verbunden werden können. So.

**I4-3#I: Und was haben sie sich dann für ihre Arbeit von TextGrid erwartet?** B: Naja. Das habe ich ja zum einen... Oh, da muss ich anders anfangen. Also jetzt konkret für meine aktuelle Arbeit kann ich sicherlich erst einmal nicht auf TextGrid zugreifen, weil mir das aus meiner Sicht noch zu sehr in einem, sich in einem Entwicklungsstadium befindet, wo ich es jetzt nicht vertreten könnte, Teile des Projekts praktisch darauf zu stützen. Aber da ich ohnehin, denke ich mir, mit TUSTEP ähnliche Wege jetzt lokal beschreite – kann ich mir gut vorstellen, dass gerade Sachen, die die Standardisierung angehen, gut über TextGrid laufen könnten. Dass ich ganz beeindruckt davon war, dass man auf eine relativ einfache Weise z.B. TEI-konforme Sachen machen kann. Wenn das lief, könnte ich mir eben auch überlegen, die Daten, die ich jetzt für unser Projekt ausgezeichnet habe, dann entsprechend umzustellen auf eine ja etwas verbreitetere Konvention wie eben TEI.

**I4-4#**Und natürlich bin ich auch überhaupt nicht daran interessiert, immer alles was ich brauche,

immer selbst zu programmieren. Insofern, wenn es Tools gibt, die funktionieren, würde ich gerne auf die auch zurückgreifen. Also wenn ich irgendwelche Indizes erstellen muss, kann ich das natürlich mit TUSTEP machen. Wenn ich aber die Möglichkeit hätte, meine Daten, wenn die entsprechend aufbereitet sind, einfach da so an ein Programm zu übergeben und die dann entsprechend aufbereitet zurückzukriegen, wäre das für mich natürlich eine Hilfe. Weil wir haben hier in unserer Arbeitsstelle eben niemanden, der jetzt nur für den EDV-Kram zuständig wäre, sondern das ist praktisch immer das, was ich zusätzlich machen muss und was dann eben von der eigentlichen Arbeit abgeht.

I4-5#Und das andere, was ich ganz spannend fand, wo aber es keine ganz eindeutige Antwort gab, war die Sache der Archivierung. Dass ich es eben auch problematisch finde, wenn sich jedes Projekt immer Gedanken machen muss: Wer ist für mich der Richtige? Wo kann ich meine Daten dauerhaft verfügbar halten? Muss ich da, weiß ich, wenn... die Unis haben das ja teilweise, dass die Server unterhalten, wo man so etwas machen kann. Hier an der Akademie gibt es das noch nicht, ist aber möglicherweise in Planung. Also da... Das sind aber dann auch immer Server, die laufen solange die Akademie die bezahlt. Das ist also immer dann eine Zusammenarbeit: Akademie – privater Serveranbieter. Und da wäre so eine institutionalisierte Lösung für mich natürlich auch interessant. Also nicht unbedingt als Backup, sondern in erster Linie natürlich auch dann zu sagen: Ich kann einzelne Arbeitsabschnitte, die abgeschlossen sind, kann ich dort einstellen und muss mir in den nächsten zehn, fünfzehn Jahren keine Gedanken darüber machen, ob der Server noch unter der Adresse zu erreichen ist. Also das wäre so ein Nebeneffekt, den ich aber durchaus wichtig fände.

**I4-6#I: Ja. Gut. Sie haben jetzt schon viel vor dem Hintergrund gesagt, dass sie das TextGrid-Lab schon getestet haben. Nur mal kurz: Hatten sie bestimmte Erwartungen vorher, die sie jetzt gar nicht erfüllt sehen? Oder sind sie da mit irgendwie einer Vorstellung hingegangen: Ich bräuchte das und das, was jetzt im Nachhinein nicht gegeben war?** B: Nö, das kann ich nicht sagen. Also ich hatte auch keine, muss ich ehrlich sagen, jetzt keine konkreten Erwartungen, was ich da jetzt mit machen kann. Sondern ich sehe, vielleicht sehe ich das ja auch falsch, aber für mich ist das ein Angebot einer Alternative, die davon wegführt, dass jeder in hunderten verschiedenen Projekten immer die gleichen Sachen neu programmieren muss. Ich meine, das ist... Wir versuchen das innerhalb der TUSTEP-Community, wenn ich das einmal so nennen darf, ja auch zu vermeiden, indem so allgemeingebräuchliche Tools dann zur Verfügung gestellt werden, weil das ja auch ein

Programmpool ist, mit dem man viel machen kann. Aber eben sehr viel selber machen. Und wenn dann eben einer eine schöne Routine zu einer, für eine bessere Fußnotenverwaltung oder für eine bessere Apparatgestaltung geschrieben hat, dann kann ich die mir einfach nehmen und in meine Routinen einbinden. Und so ähnlich sind, denke ich mir meine Ansprüche an so etwas wie TextGrid. Auch, dass man einen Pool hat, wo verschiedene Hilfsmittel angeboten werden und ich einfach auswählen kann: Brauche ich das jetzt, brauche ich das nicht. Und wenn ich das brauche, dann kann ich das benutzen. Kann das aber auch, wenn ich das richtig gesehen habe entsprechend modifizieren. Ich habe ja auch Zugriff auf die, zumindest in gewisser Weise erhoffe ich mir das so, dass man auch Zugriff auf die, diese Auswertungsroutinen hat. Dass man da auch möglicherweise Parameter übergeben kann. Und so ist das dann ein Hilfsmittel unter anderen. Und ich bin daher auch nicht irgendwie, weiß nicht, voreingenommen, dass ich jetzt sagen würde: Ich arbeite nur mit dem oder mit dem. Sondern ich gucke halt, ich bin da sehr ergebnisorientiert, mit dem Werkzeug, mit dem ich am schnellsten zu meinen Ergebnissen komme. Und natürlich auch, was ganz wichtig ist: was aber auch eine gewisse Nachhaltigkeit verspricht, das benutze ich. So ganz schlicht. Ich würde TextGrid nicht benutzen, weil ich meine, dass TextGrid eine gute Sache ist und dass das unterstützt werden muss. Sondern ich würde gucken: Bietet das das, was ich brauche, wenn ich halt einen einfachen Textvergleich oder einfach einen Apparat machen müsste. Und komme ich damit schneller oder besser zu dem Ergebnis, was ich gerne hätte, als mit dem was ich zurzeit benutze. So. Also das ist ganz pragmatisch.

**I4-7#I: Ok. B: Ja. I: Also es ist ihnen auch wichtig: die Individualisierbarkeit des Ganzen.**

**B: Ja. I: Und Anpassbarkeit. B: Ja. Also ich sehe...I: Koppelbarkeit an andere Prozesse. B:**

**Ja. Also ich sehe schon die Notwendigkeit, dass man gewisse Standards braucht, um ....ja, um so ein Werkzeug benutzen zu können. Natürlich können da nicht X verschiedene Auszeichnungsformen, können nicht in einen Topf geworfen werden. Also da finde ich eine gewisse Standardisierung auch durchaus in Ordnung. Aber was mich die letzten bestimmt schon bald zwanzig Jahre bei TUSTEP immer überzeugt hat, war, dass ich immer genau das kriegen konnte, was ich gebraucht habe. Und dass ich dann, dass ich keine Zugeständnisse machen musste, an der Stelle, wo es dann bei anderen Programmen heißt: Naja, genau das geht nicht. Aber dafür kann man etwas anderes ganz schön machen. Also das ... Ich möchte immer das haben, was ich auch brauche und nicht irgendwelche tollen Werkzeuge, die mir alles mögliche machen, aber nun gerade nicht das, was ich gerne hätte. Also so... weiß ich nicht. Und natürlich**

auch auf einem möglichst direkten Weg.

I4-8#Also ich bin durchaus bereit, auch Energie zu investieren, um ein Programm, was viel kann, auch zu erlernen. Also ich bin schon auch.... oder habe auch die Erfahrung gemacht, dass egal, mit welchem Programm man arbeitet: Es gibt kein professionelles Programm, was sich von alleine bedienen lässt. Und so denke ich mir, wird das bei TextGrid auch sein. Das wird man nicht eben mal so als ein Programm unter vielen einmal bedienen können. Ich meine abgesehen von solchen Sachen, dass man sagt: Ich habe hier zwei Dateien, die sind irgendwie ähnlich. Vergleiche mir die einmal. Und dann gibt man die dann rein und kriegt irgendein Ergebnis raus. Das mag sein, dass das relativ unkompliziert und ohne viel Kenntnis funktionieren kann. Aber sobald man anspruchsvollere Ergebnisse erwartet, muss man auch entsprechend investieren. Und das ist bei einem Officeprogramm nicht anders als bei TUSTEP. Wenn man halt, ja... Bei Officeprogrammen kann man auch mal Cross-schreiben und das ist mindestens genauso kompliziert für einen Laien, wie ein Parametersatz bei TUSTEP oder also sicherlich auch bei TextGrid hinzukriegen.

**I4-9#I: Sie sagen, ihnen ist wichtig, dass sie damit wirklich genau das machen können, was sie brauchen. Da stellt sich natürlich die Frage: Ich mache eine Bedarfserhebung. Was, wie würden sie das beschreiben, was sie brauchen? Oder ändert sich das in einem Arbeitsprozess so sehr, dass ihnen besonders wichtig ist auch das Programm anpassen zu können? Also einfach formuliert die Frage: Was brauchen sie dann?** B: Ja. Das ist schwierig und immer projektabhängig. Naja, vielleicht ganz allgemein gesagt, oder die allgemeinste Ebene ist sicherlich, dass man Daten auf eine Art und Weise eingeben kann, die einem eine sehr genaue Auswertung dieser Daten auch ermöglicht. So, das ist vielleicht der kleinste gemeinsame Nenner, dass ich also egal ob es jetzt ein Text ist, in dem ich Registereinträge oder in dem ich bestimmte Wortformen kennzeichne oder setze, oder ich weiß nicht was... möchte ich dann die Möglichkeit haben, praktisch unbegrenzt diese, diesen, diese Daten mit weiteren Informationen anzureichern, um die dann entsprechend auswerten zu können. Also das ist ja egal, ob ich jetzt eine Bibliographie mache, wo ich verschiedene Informationen mit einem Datensatz verbinde oder ob ich eine Edition mache, wo ich dann sage: Das ist die und die Textstelle und da gibt es die und die Vergleichstexte dazu. Oder ich verbinde das mit einem Bild der handschriftlichen Vorlage. Also so das wäre ganz allgemein gesprochen, das was man braucht.

I4-10#Und dann ist für die Anwendung wichtig, dass die Wege genau beschrieben sind, wie man Daten dahin bekommt. Und wie man Daten wieder zurückbekommt. Das heißt also... Es ist

einfach... Die Arbeitssituation ist oft so, dass man Daten in unterschiedlichen Formaten angeliefert bekommt. Teilweise irgendwelche digitalisierten Daten im Netz schon hat, oder von anderen bekommt. Dass man, ja dass man in der Lage sein sollte, möglichst einfach diese Daten so zuzubereiten, dass man sie dann auch mit zum Beispiel TextGrid auswerten und dort eingeben und dort weiterverarbeiten kann. Und was man dann hinterher davon macht, ob man jetzt einen Wortindex macht oder ob man einen Vergleich macht oder ob man ein Register erstellt oder ob man eine digitale Edition oder einen digitalen Text für das Netz erzeugt, oder für eine Satzausgabe – das denke ich mir, ist dann, ist dann nachrangig. Aber so... Diese Modularität wäre mir wichtig. Aber jetzt zu sagen, genau das und das brauche ich, wäre jetzt schwierig. Ne, also das hat sich bei den Projekten, die ich bis jetzt gemacht habe, auch immer gezeigt, dass man letzten Endes für jedes, doch immer ein bisschen andere Anpassungen vornehmen musste. Möglicherweise liegt das ja dann auch daran, dass man dann, dass man selber zu faul ist, praktisch sich an einen allgemeinen Standard anzupassen. Also ich kann mir schon vorstellen, dass, wenn ich mir die Mühe gemacht hätte, mich in diese TEI-Guidelines einzuarbeiten und genau zu gucken, dann hätte ich sicherlich diese ganzen Urkunden, die wir aufgenommen haben, auch irgendwie in TEI kodieren können. Nur wenn halt ein Projekt von vorneherein die Vorgabe hat: Wir machen eine Buchpublikation. Und alles, was auf dieser digitalen Ebene lief und läuft, mehr oder weniger dann die eigene Initiative ist. Dann lässt sich das auch schwer vermitteln. Also da, denke ich mir, gibt es auch noch eine ganze Menge an Überzeugungsarbeit zu leisten. Nicht nur bei denen, die Anwender sind, sondern auch bei denen, die das letzten Endes entscheiden, wie heutzutage wissenschaftlich mit Texten gearbeitet wird. Wie wichtig das eigentlich ist, dass da Standards eingehalten werden. Und dass man auf verschiedenen Ebenen die Sachen bereitstellt.

**I4-11#I: Welchen Gesamtindruck hatten sie jetzt von dem TextGrid-Lab nach diesem ersten Test? Einfach...** B: Also das... Das ist... **I: So ihr erster Eindruck danach?** B: Also das ist in der Tat schwierig. Also was ich sagen kann, dass es für mich durchaus einen professionellen Eindruck machte, auch wenn einiges nicht funktioniert hat. So, also. Das denke ich schon. Also dieser Aufbau, dass man unterschiedliche Ebenen des Zugriffs hat. Dass man unterschiedliche Teile der Benutzeroberfläche sich gestalten kann. Das fand ich schon sehr gut. So dass man den Eindruck hat: Da wird nicht so ein Allerweltstool geschaffen. Sondern man hat innerhalb dieser Komplexität durchaus die Möglichkeit, die Sachen, die für einen selber interessant sind, in den Vordergrund zu holen und dann entsprechend bedienen zu können. Alles

Weitere fiel mir jetzt schwer da etwas dazu sagen, weil dafür für mich einfach diese Ausprobierzeit zu kurz war. Also...

**I4-12#I: Was hatten sie dann für einen Eindruck von der optischen Gestaltung? Also einfach auch von dem look&feel her?** B: Also das look&feel fand ich gut. Also man müsste wahrscheinlich... Also das einzige, womit ich anfangs Schwierigkeiten hatte... Oder was heißt das Einzige? Aber das ist mir jetzt in Erinnerung geblieben, war, dass man nochmal ganz klar sich bewusst machen muss, wann welche Daten wo abgelegt und wo verändert werden. Also da, meine ich, hatte ich anfangs ein bisschen Schwierigkeiten. Wenn ich recht mich entsinne war es so, dass man sowohl die Sachen lokal speichern und bearbeiten kann als auch auf dem TextGrid-Server. Und dann auch... Aber das ist aber auch eine Sache, mit der ich sonst noch nie gearbeitet habe und wo ich noch immer so ein bisschen Schwierigkeiten habe, diese Vergabe von Rechten und von... Wie macht man das dann tatsächlich in diesem so genannten Workflow, dass man einen Datensatz hat, den man von..., weil dass ist ja auch das, was dahinter steckt und das wäre für uns auch, das hatte ich vorhin vergessen zu erwähnen, ganz hilfreich. Dass man eben von unterschiedlichen Arbeitsplätzen auf dasselbe Datenmaterial zugreifen kann. Ne? Wir haben eine Arbeitsstelle in M. Wir haben verschiedene Kommissionsmitglieder, die in P, L und so weiter sitzen. Und da wäre, allein das wäre schon hilfreich, wenn man sagen könnte: Hier. Die aktuellen Daten kann man da und da einsehen. Und für die Leute, die eben in der, die in die Bearbeitung mit eingebunden sind, denen kann man entsprechende Freigaben erteilen, dass die dann korrigierend oder ergänzend darauf zugreifen können. Also, das ist zum einen, finde ich, ein ganz wichtiger Aspekt von TextGrid. Aber eben auch einer, weiß nicht, wo man vielleicht selber noch daran arbeiten muss oder was da vielleicht etwas, vielleicht auch deutlicher in der Bedienungsführung einem klargemacht werden muss. Dass man immer genau weiß: Habe ich jetzt die Daten auf dem Server verändert? Und wie kriege ich jetzt diese veränderten Daten lokal? Dass ich jetzt meinetwegen, wenn ich im Zug bin, da dann weiterarbeiten kann und dann praktisch wieder ein Update oder einen Abgleich mit den Daten auf dem Server machen kann. Also das, das denke ich mir, ist eine ganz wichtige Sache. Und da könnte ich mir vorstellen, dass man das noch etwas transparenter gestalten könnte. **I: Also ist für sie ein ganz wichtiger Punkt der kooperative Ansatz und Zugriff auch dezentral von verschiedenen Stellen...** B: Ja. **I: ...damit man darüber zusammenarbeiten kann.** B: Auf jeden Fall. Ja. **I: Von verschiedenen Orten.** B: Ja. Ja. Ich meine hier so einen Arbeitsstellenserver. Der ist schnell installiert und da kann man sich dann irgendwie absprechen. Kann man... Sieht man ja, wenn man eine Datei

aufruft, die der andere gerade in der Mache hat, dass da, dass es da dann keine Schreibrechte gibt. Aber es wäre... Ja. Also. Ich stehe nämlich jetzt auch gerade vor dem Problem. Ich möchte gerne diese Bibliographie, die wir haben, auf einen Server bringen. Aber da muss man sich dann selber kümmern. Das muss man installieren. Da muss man dann sich selber um die Rechtevergabe kümmern. Und wenn man da eine Arbeitsumgebung hätte, wo man sagen könnte: So, wir richten jetzt da unsere Arbeitsgruppe ein. Und die und die Texte sind schon mal da. Und für den und den Text hat der und der mit dem Login, Schreib- oder Leserechte. Also das wäre schon ganz wunderbar.

**I4-13#I: Fallen ihnen noch ein paar Stellen ein, an denen sie Probleme hatten bei dem Test?**

**Gut. Sie haben ja eben schon zwei genannt.** B: Ja. Also da jetzt. Ne, also habe ich nicht mehr so präsent, dass ich das jetzt sagen könnte, wo jetzt wirklich das gehapert hat. **I: Ja gut. Die wichtigsten sind dann ja schon erfasst. Sie haben jetzt ein zwei Sachen angesprochen. Wenn sich da...** B: Bei den anderen Sachen denke ich mir... Oder was heißt: bei den anderen Sachen. Wenn ich das richtig in Erinnerung hatte, war eine Möglichkeit ja: Daten strukturiert nach entsprechend angepassten TEI-Konventionen einzugeben. Da ist es dann sicherlich in erster Linie mein Problem, dass ich mich damit noch nicht genügend beschäftigt habe, um tatsächlich ermessen zu können, was ich da an Hilfestellung beziehungsweise wo dann doch die Schwierigkeiten liegen. So vom Prinzip her ist mir das zwar klar, wie das funktioniert und was das für Vorteile hat. Aber da ich selber damit noch nicht gearbeitet habe, habe ich da natürlich auch noch nicht das Urteilsvermögen wie jemand, der so, weiß nicht, so mit dem TEI-Editor arbeitet. Und kann das eben mit den Möglichkeiten, die das TextGrid-Lab da anbietet, nicht vergleichen.

**I4-14#I: Was würden sie dann sagen. Wie würden sie die Erlernbarkeit beurteilen? Einfach aus ihrer Perspektive mit ihren Vorkenntnissen in dem Bereich?** B: Also da, denke ich mal, da sehe ich erstmal keine Schwierigkeiten. Also ich gehe davon aus, dass man bei jedem Programm eine gewisse Einarbeitungsphase braucht. Aber das schien mir nicht so, ja. Zumindest die Sachen, die wir gemacht haben, schienen mir so, dass, wenn man vorgegebene Arbeitsschritte hat... Jetzt, weiß nicht, Texterfassung oder sowas, wo man eine selbst vorgegeben angepasste TEI-Struktur hat. Kann ich mir gut vorstellen, dass man das mit relativ geringem Aufwand auch umsetzen kann. Also da sähe ich keine Probleme.

**I4-15#I: Haben ihnen noch bestimmte Funktionen gefehlt? Dass sie sagen würden: Das müsste unbedingt dazu. beziehungsweise war ihnen irgendwas völlig neu? Dass sie gedacht**



**hätten: Sieh mal an. Sowas gibt es. Die beiden Bereiche würden mich noch interessieren. B:**

Ne, also da... Weder das eine noch das andere, könnte ich jetzt etwas dazu sagen. Also, ne. Also das, was gezeigt wurde, woran ich mich erinnern kann, das waren Sachen, die mir schon irgendwie, denke ich mal, bekannt waren, die ich vielleicht so noch nicht gemacht habe. Aber das war jetzt nicht etwas gänzlich Neues. Und. Ja. Ob die Sachen dann tatsächlich so funktionieren, wie man das dann erwartet? Das denke ich mir, das zeigt sich einfach in der Praxis. Also das kann... Da kann man auch mit so ein bisschen ausprobieren gar nicht zu verwertbaren Ergebnissen kommen. Also das wäre dann verfrühtes Urteil, nach einer halben Stunde Testphase da... **I: Ja, klar.** B: ...zu fällen. Das sind ja dann oft ganz, ich will nicht sagen, marginale Sachen. Aber, weiß nicht was, wenn man dann merkt, dass das...ja, weiß nicht, wenn es dann Begrenzungen in der Textmenge gibt. Oder wenn man merkt, dass wenn man, sobald man bestimmte Transfergrößen übersteigt, dass es dann vom Arbeiten zu zäh wird, oder so etwas. Das sind letztlich, denke ich mir, viel eher Kriterien, die dann für oder gegen so ein Werkzeug im Netz sprechen. Weil das ist ja gerade das Interessante daran, dass man egal wo man ist, an welchem Gerät man sitzt. Wenn ich mich... So habe ich das verstanden. Wenn ich mich einlogge, bin ich in meiner Arbeitsumgebung, habe ich meine Texte zur Verfügung. Muss mich also nicht darum kümmern, ob ich jetzt gerade wieder die neueste Fassung eingesteckt habe. Habe meine, weiß nicht, Listen da, meine..., die Möglichkeit, Verzeichnisse zu erstellen oder Texte zu vergleichen. Und das macht die Sache ja neben der eigentlichen, neben dem eigentlichen Werkzeugcharakter jetzt von TextGrid. Aber das ist die Sache, die es interessant macht und die es auch von anderen Tools, die man immer auf dem eigenen PC installieren kann, auch deutlich unterscheidet. Dass man eben nicht immer dann sagen muss: Ja. Ich richte dir das bei dir auf dem Rechner ein und dann kannst du damit auch arbeiten. Sondern, dass man einfach sagen kann: Hier ist dein Login für das Projekt. Und dann... Man hat ja einen wesentlich geringeren administrativen Aufwand dann auch. Ne? Also hier ist es ja immer so: Ich muss auf jeden ... Oder ich muss dann die aktuelle TUSTEP-Fassung bereithalten. Muss dann immer sehen, dass auf den Rechnern, wenn man ihn mitnimmt auch die entsprechen angepassten Programmdateien usw. sind. Das muss man ja alles selber machen. Wenn man das nicht mehr muss, wäre das schon eine große Hilfe. **I: Das ist ja auch eine Idee, die dahintersteckt. Dass man eine digitale Infrastruktur...** B: Genau. **I: ...zur Verfügung stellt, die einen einfachen Zugang von überall her bietet.**

**I4-16#Da wären wir jetzt auch bei dem Stichpunkt: eHumanities allgemein. Also weg von**

**dem konkreten TextGrid-Lab und dem TextGrid, was getestet wurde, selbst, hin zu – eher perspektivisch: Was verbinden sie mit dem Begriff eHumanities? Und welche Potentiale sehen sie in dem Bereich?** B: eHumanities? Naja. Also ich gehe schon davon aus, und wenn man die Entwicklung der letzten Jahre betrachtet, was heute möglich ist, was vor zehn Jahren noch undenkbar schien – gehe ich schon davon aus, dass man davon weg kommt. Zum einen von den Einzelplatzgeräten, von dem... also zumindest für die Wissenschaft sollte es nicht nötig sein, dass man immer die aktuellsten Programme und die aktuellsten Rechner und und und hat. Sondern, dass das Zusammenarbeiten tatsächlich im Netz stattfindet. Also ich nutze relativ viel auch die Angebote, sage ich mal, von digitalisierten Daten im Netz. Also dass man die Möglichkeit hat, ohne sich vom Schreibtisch oder vom jeweiligen Arbeitsplatz wegzubewegen, Dokumente einzusehen, egal ob das jetzt neuzeitliche sind oder mittelalterliche. Dass man da einen Zugriff darauf hat, ohne Mikrofilm zu bestellen. Dass man also... dass das, also dieser ganze Trend, digitales Wissen im Netz zur Verfügung zu stellen, sicherlich voranschreitet. Und dass die... Also dass auch die Bestrebungen, bei den Office-Programmen hat man das ja auch, dass man versucht, eben diese Officeanwendungen auch als Programme im Netz zur Verfügung zu stellen. Und das wäre für die Wissenschaften eher noch wichtiger. Eben aus den genannten Gründen, dass es heute nicht immer zu realisieren ist, dass alle, die an einem Projekt arbeiten, auch am selben Ort sitzen. Dass man eben viel Organisationsarbeit und auch viel Zeitverlust durch Reisen einsparen kann, indem man so eine, ja, Arbeitsumgebung, also in Form von einer Materialbereitstellung und bis zur -verarbeitung und bis zur dann wieder ausgewerteten neu zur Verfügungstellung, wenn man das alles in diesem Bereich der, des Netzes realisieren kann. Also dass man nicht CDs rumschicken muss oder USB-Sticks oder so. Sondern dass man das wirklich sagen kann: Hier. Da nachgucken. Das steht es. Und da ist das dann auch verlinkt. Also das.... Da erwarte ich mir, dass das in den nächsten Jahren auch noch entsprechend zunimmt.

**I4-17#I: Digitale Infrastruktur kann man ja, vereinfacht gesagt, als Vernetzung von Arbeitsprozessen und Inhalten ansehen. Sie haben jetzt zu beidem eigentlich schon etwas gesagt. Wo sehen sie denn die Verbesserungsmöglichkeiten oder die Mehrwerte, die durch die Vernetzung von Arbeitsprozessen möglich sind? Also Zusammenarbeit auf digitalem Wege. Also jetzt jenseits von E-Mails hin und her schicken. Sondern dass man beispielsweise gemeinsam an einem Projekt arbeitet. Wie sie sagen: Sie haben Außenstellen in L oder in M. Wie könnte das genau aussehen für sie, jetzt abseits der reinen Kommunikation? Wie ist das interessant für sie?** B: Naja. Allein wenn man, wenn ich jetzt an

die Sache denke: Texterstellung. Wir haben eben da eine Edition eines Rechtstextes in digitaler Form. Der wird ergänzt um die Edition desselben Rechtstextes in [Auslassung wegen Anonymisierung, Anm. d. Interviewers: einer anderen] Sprache. Und wenn jetzt gleichzeitig jemand daran arbeiten könnte, da noch die [Auslassung wegen Anonymisierung, Anm. d. Interviewers: anderssprachige] Version einzugeben. Oder man das eben zum Korrekturlesen einfach freischalten könnte. So muss ich ja immer... Bei unserer Bibliographie ist es ja genauso. Wenn meine Kollegin aus M kommt, dann bringt sie die Daten praktisch mit, die sie in der Zeit wo sie in M war, jetzt neu in die Bibliographie eingegeben hat. Die muss ich dann da an unsere Datendatei anhängen und verbinde die dann praktisch da mit unseren Daten. Und dann gebe ich das ihr wieder mit und sie muss das bei sich auf der Festplatte wieder einspielen. Ich kann ihr das auch per Mail schicken, aber das ist einfach unpraktisch so. Und wenn das eben zentral verfügbar wäre, dann könnten wir zur gleichen Zeit an dem Datensatz arbeiten. Oder an dem, an der Datei arbeiten, an unterschiedlichen Datensätzen. Entschuldigung. [Telefon klingelt] **I: Kein Problem.**

B: Ja also wie ich gerade schon sagte mit: Das Mail hin und her schicken ist schön, aber allein die... Also ich habe das bei den Wordtexten, das weiß jeder, der mit so etwas arbeitet, dass wenn man mit fünf Leuten zusammenarbeitet hat man fünf verschiedene Wordversionen. Und wenn ich jetzt jemandem in P meine, wenn ich jetzt nicht im Kompatibilitätsmodus speichern würde, sondern wenn ich denen meine Office 2007-Version schicken würde, hätte der schon Schwierigkeiten. Und alleine solche Sachen wären aus der Welt, wenn man sagen könnte: da steht das und man braucht kein individuelles Programm auf dem Rechner, um eine Datei aufzumachen oder um die anzugucken, um die zu bearbeiten. Sondern wenn das zentral zur Verfügung gestellt wird und das heißt, es wären alle leistungsmäßig auf dem gleichen Niveau und man müsste sich über solche Sachen keine Gedanken mehr machen. Diese ganze Konvertiererei ist ja glücklicherweise einfacher geworden, aber das Problem ist ja noch lange nicht aus der Welt. Insofern wäre allein so etwas, dass man Anderen Zugriff, Einblick auf die Projektdaten geben könnte, wäre eine große Hilfe. So muss man die immer mit entsprechendem Aufwand über Platten, Sticks usw. transportieren. Und wenn da entsprechende Kapazitäten da wären, wäre das natürlich hilfreich und da wäre dann... Das habe ich in Trier glaube ich gar nicht gefragt. Ich weiß nicht, ob dazu was gesagt worden ist. Ich kann mir vorstellen, dass, wenn es dann diese Möglichkeit gibt, dass da verschiedene Arbeitsgruppenprojekte komplett oder teilweise da mit dem TextGrid-Lab arbeiten, dass da eine Menge Datenmaterial zusammenkommt. Also das fängt ja immer ganz klein an, weiß nicht, die Bibliographie selber, die hat vielleicht zwei Megabyte.

Aber da hängen an verlinkten digitalen Inhalten, also sprich an verlinkten PDF-Dateien und Bildern und ich weiß nicht was, hängen da bestimmt dann nochmal 10 Gigabyte hinten dran. Und so etwas müsste ja dann auch dann entweder alles dort gehostet werden beim TextGrid-Server. Oder aber man müsste dann entsprechende Möglichkeiten finden, das auch auf externen... Also dass man sagt: Es gibt den einen Platz, wo eben an dem veränderbaren Material gearbeitet wird. Und dann gibt es den anderen Platz, wo mehr oder weniger die statischen Materialien, seien es jetzt Digitalisate von Handschriften oder von Bildern oder von sonst irgendwas herumliegen. Also da. Aber das ist wahrscheinlich auch berücksichtigt bei TextGrid kann ich mir vorstellen...

**I: Ja...** B: dass da... Da ist man ja durch die Verlinkungsmöglichkeiten ist man da ja von vorneherein nicht festgelegt. Das muss ja nicht alles immer im selben Verzeichnis liegen, sondern das kann ja irgendwo dann sein.

**I4-18#I: Sie haben ja gerade die Szenerie beschrieben, was da alles dranhängen kann an so einem Projekt. Dass Verlinkungen bestehen. Ich nehme an sie halten es ja dann für relativ wichtig, dass man da den Überblick behält. Also was wäre für sie in dem Zusammenhang wichtig?** B: Dass man den Überblick behält. **I: Oder wie könnte man das lösen?** B: Also da

habe ich mir ehrlich gesagt noch keine Gedanken darüber gemacht. Ich gehe mal davon aus, dass da zunächst einmal jeder selber dafür sorgen muss, dass die Materialien, auf die er verlinkt, auch an der Stelle liegen, wo sie sind. Hilfreich wäre... Also wo ich eher die Probleme sehe, wäre eine Versionsverwaltung. Dass man also nicht den Überblick über die vorhandenen Daten, also sprich die reine Menge an Dateien. Die kann natürlich auch ziemlich groß sein und da muss dann jeder selber sehen, wie er das in entsprechende Verzeichnisse und mit entsprechenden Namen wie auch immer kennzeichnet. Aber heikel, das sehe ich auch bei... oder das Gefühl habe ich immer bei Backup-Programmen oder bei solchen Synchronisierungsprogrammen, dass ich immer ein bisschen Schwierigkeiten habe, mich darauf zu verlassen, ob der mir dann auch immer die richtige Version dann anzeigt, beziehungsweise in die richtige Richtung dann rettet. Da denke ich mir, wäre eine Hilfestellung vom TextGrid-Lab sicherlich sehr wünschenswert. Das heißt, dass ich darauf hingewiesen werde, dass, wenn ich auf einer Dienstreise war und da irgendetwas gemacht habe, dass ich dann eine praktikable Lösung angeboten bekomme, um meine veränderten Daten dann mit den Daten abzugleichen, die sich möglicherweise in der Zeit auch verändert haben. Also so ... Da weiß ich nicht, ob so etwas überhaupt möglich ist. Aber man müsste auf jeden Fall darauf hingewiesen werden, dass man mit einem..., dass man gesagt kriegt: Also hier an der Datei wurde etwas geändert und zwar das und das. Und dass man dann die

Änderung praktisch in die eigene Datei übernimmt. Oder die Änderung, die man selber gemacht hat in die Datei schreibt, ohne dass man jetzt das eine oder andere dadurch kaputt macht. Und dass natürlich auch es so eine Möglichkeit geben müsste, überhaupt einer Versionspflege. Dass man also nochmal... Dass man also nicht einfach wie bei einem Officeprogramm rückgängig machen kann, sondern dass man einfach sagen kann: Moment mal. Ich brauche jetzt nochmal die Version von vor zwei Wochen. Also dass das nicht immer überschrieben wird, sondern dass man auch die Möglichkeit haben müsste so einer Versionsverwaltung, dann der zu bearbeitenden Daten. Also das denke ich mir gerade. Aber ich kann mir vorstellen, dass das ohnehin ein zentrales Thema auch beim TextGrid-Lab ist, weil immer, wenn man mit mehreren Leuten von mehreren Standorten aus arbeitet, geht das ohne so etwas gar nicht. Ne? **I: Klar.** B: Also die Rechte, das hängt ja an der Rechteverwaltung auch. Und da ist dann eine Versionsverwaltung wahrscheinlich unabdingbar mit verknüpft.

**I4-19#I: Wir haben jetzt vor allem darüber gesprochen: Wie ist Kooperation möglich? Wie ist Zugriff auf Daten möglich? Deren Verknüpfung. Wenn man sich jetzt diese Netzwerkstrukturen vorstellt. Sehen sie da irgendwo eine Möglichkeit auch wissenschaftliche Erkenntnisse zu gewinnen mit digitaler Infrastruktur? Die vielleicht durch konventionelle Methoden nicht möglich wären?** B: Naja, klar. Auf je mehr Daten ich zugreifen kann, die nach mehr oder weniger dem gleichen Muster kodiert sind, desto weniger muss ich ja selber an Arbeitsleistung einbringen. Das ist ja das. Seitdem es digitale Daten gibt, wird das ja moniert. Und es gibt immer wieder Versuche. Ich meine jetzt gerade auch wieder gelesen zu haben, dass in Amerika der Herr C an so einem Projekt: digitale Datenbereitstellung arbeitet. Das wurde immer diskutiert, weil man dann nicht weiß, wie qualifiziert die Daten aufbereitet sind. Und und und. Aber grundsätzlich denke ich mir, dass es eine Hilfe für jeden, der da Daten eingibt oder der mit den Daten arbeiten will, ist. Wenn man weiß, die Daten liegen in einem bestimmten Format vor, in einer bestimmten, für jeden dann auch durchsuchbaren und auswertbaren Form. Dass man da sagen kann: Ich möchte jetzt nur deutschsprachige Quellen aus einem bestimmten Jahrhundert haben. Und die sind in einem digitalen Pool vorhanden. Und ich kann da nach bestimmten Wortformen und bestimmten Termini suchen. Also allein auf diesem Wege, also auf so einer ganz banalen Vergleichsebene, die ja erstmal nur quantitativ Sachen bereitstellt. Aber allein da, denke ich mir, sind schon zum einen Erkenntnisse möglich. Und zum anderen auch Erleichterungen, weil nicht jeder seinen Materialpool sich selber erstellen muss. Sondern dass der Materialpool mit jedem Projekt, was da integriert ist, auch wächst. **I: Wäre**

**dann eine konkrete Ausformung, also große Datenmengen miteinander vergleichen, zu können, auswählen zu können und ähnliches...**

I4-20#B: Ich sehe da auch... Ich sehe da auch gar keine, beziehungsweise, ich weiß, dass es Schwierigkeiten gibt, weil natürlich jeder dann immer denkt: Andere machen mit meinen Daten das, was ich vielleicht in zehn Jahren auch mal mit denen machen wollte. Dann müsste man sicherlich Formen finden, dass es da nicht so zu Ungleichgewichten geht. Dass man kommt. Dass man irgendwelche Formen der, ja weiß nicht, der Kennzeichnungspflicht einführt. Dass es also zwangsweise so ist, dass, wenn jemand digitalisiertes Material von jemand anderem benutzt, dass das irgendwo auch gekennzeichnet wird. Dass das praktisch mit fremder Hilfe auch entstanden ist. Weil da weiß ich, dass es eben viele gibt, die einfach sagen: Nein. Ich stelle meine Daten nicht ins Netz, weil ich nicht will, dass da einer dann praktisch aus meiner Arbeit sich dann sich selber die Lorbeeren aufsetzt. Aber ich denke mir, das sind Sachen, da wird man in Zukunft mit leben müssen. Und da wird es auch, ich will nicht sagen, einen anderen Begriff von Urheberrecht, dann geben müssen. Aber es wird auf jeden Fall... Ja, denke ich mir, sind... Die Vorteile überwiegen die Nachteile. Dass man dann möglicherweise seine eigenen Schlüsse nicht so publizieren kann, weil dann möglicherweise ein anderer dann das Material ausgewertet hat. Aber das, denke ich mir, ist ein anderer Bereich. Da muss man sich sicherlich auch Gedanken darüber machen. Und ich weiß ja, das wurde ja auch gesagt, dass die TextGrid-Sachen, solange sie im Arbeitsprozess sind und nicht freigegeben sind, kann die auch niemand anderes durchsuchen und jeder kann wie heute ja auch entscheiden, ob er die freistellt. Wenn ich das richtig verstanden habe, ist das ja kein Zwang bei TextGrid. Also man kann sicherlich das auch nur benutzen und hinterher, wenn man dann fertig mit der Arbeit ist, macht man ein Buch. Und die Daten verschwinden wieder. Oder man schaltet sie einfach nicht frei. Also da ist man ja nicht festgelegt. Aber man hat eben die Möglichkeit, wenn man sagt: das Projekt ist jetzt für mich abgeschlossen und ich wollte nur die Quellen nur zum Druck geben. Aber das digitale Material stelle ich jetzt zur Verfügung für irgendwelche Wörterbuch- oder anderen linguistischen Projekte. Das denke ich mir, ist durchaus positiv dann zu sehen.

**I4-21#I: Bei dieser Auswertung... Können sie das irgendwie beispielhaft konkretisieren? Also wenn, wenn man jetzt mit einer großen Datenmenge hantieren kann – nochmal zurück zu möglicherweise wissenschaftlichen Erkenntnissen, die man auf digitalem Wege gewinnen kann. Was konkret könnte dabei herauskommen? Also jetzt bei einer Auswertung und Vergleich. Was meinen sie da genau? Dass man bestimmte Muster erkennt? Oder? B: Naja.**

Ich kann das nur so allgemein oder beziehungsweise von unserem Projekt aus gesehen machen. Das heißt, wenn wir Erkenntnisse darüber gewinnen wollen, wie die Rechtsquellen des x-Rechts – also des S und des M Stadtrechts – wie die auf dem Wege der Rezeption in O aufgenommen wurden und aber dann auch praktisch für die Entstehung oder Modifizierung bestehender Rechtsbegriffe und Rechtszusammenhänge verwendet wurden. Wie sie aus der... Zum einen der Transfer von der deutschen Sprache in die jeweilige Landessprache, wie der vollzogen wurde. Und was es da für Einflüsse dann von bestehenden Rechtstermini und bestehenden Rechtsgewohnheiten gegeben hat. Da müssen wir, um diese Erkenntnisse zu bekommen, müssen wir erstmal die deutschen Quellen irgendwie auswerten können. Und das kann man bei der Textmenge nicht einfach nur durch Lesen machen. Sondern man muss die irgendwie digital verfügbar haben, dass man sagen kann: Ich interessiere mich jetzt für diese zwanzig Rechtstermini. Die kennzeichne ich und dann versuche ich entsprechende... Also ich muss die Texte erstmal selber digital zur Verfügung für mich aufbereiten. Muss dann die Vergleichstexte eingeben. Und wenn ich, wenn da andere Projekte, meinetwegen Editionsprojekte zum M Recht – das was wir jetzt teilweise eben nutzen. Aber das ist nur ein günstiger Zufall, weil ich halt vorher in dem anderen Projekt auch gearbeitet habe und die digitalen Daten habe. Habe ich natürlich einen Vorteil, dass ich einen großen Aufwand an Transkriptionsarbeit und Digitalisierungsarbeit erstmal nicht mehr leisten muss. So. Und je mehr Texte digital verfügbar sind, die mich interessieren, umso eher kann ich dann zu den von mir gewünschten Ergebnissen kommen. Es ist ja bei analog verfügbaren Daten genauso. Ich gucke, wenn ich Material auswerten will: Gibt es da Editionen? Dann stehen die praktisch auf der Liste des für mich interessanten Materials schon mal weiter oben, weil ich natürlich auch weiß, dass meine Arbeitszeit begrenzt ist. Und bevor ich jetzt dann noch zehn Rechtsbücher, die noch nicht ediert sind, mir angucke und die möglicherweise dann erstmal edieren muss, nehme ich natürlich Material, was schon da ist. Was natürlich vielleicht wissenschaftlich nicht unbedingt der beste Weg ist. Aber man steht ja immer vor dieser... Oder man ist ja immer damit konfrontiert, dass man nach einer bestimmten Zeit auch gewisse Ergebnisse zu bringen hat. Und da denke ich mir, dass das ein so wachsender digitaler Quellenpool sicherlich für alle hilfreich ist. Ich meine: klar. Wenn jetzt kein anderes Projekt sich mit f Rechtsquellen zum x Recht beschäftigt, dann habe ich halt Pech gehabt. Das kann ich auch erstmal so nicht erwarten. Aber die Wahrscheinlichkeit, dass ich auf dem Wege an Daten komme, ist auf jeden Fall größer als es im Augenblick der Fall ist. Weil so ist es noch viel mehr dem Zufall zu überlassen, dass ich jetzt den oder die

Wissenschaftler kennenlernen, die zufällig in P an so einem Digitalisierungsprojekt arbeiten und dass die mir dann auch ihre Daten zur Verfügung stellen. Und und und. Und dann sind die halt nach unterschiedlichen Konventionen ausgezeichnet. So. Da denke ich mir, das ist jetzt nicht was... Deswegen sagte ich ja eingangs auch: Ich erwarte mir jetzt für die laufende Arbeit, unser Projekt geht noch bis Ende 2018. Da wird sich bei TextGrid sicherlich noch viel tun. Aber ich erwarte mir eben nicht, dass ich nächstes Jahr auf TextGrid praktisch umsteige als Arbeitsplattform. Aber es ist auf jeden Fall der Weg, wo ich sagen würde: Ok, wenn es da Möglichkeiten gibt, könnte ich mir schon vorstellen, dass ich unsere Materialien, die wir bis dann haben, entsprechend so aufbereiten würde, dass man die dort verarbeiten kann. Allein eben aus solchen Gründen, wie des Zusammenarbeitens mit anderen Wissenschaftlern. Und da würde ich mir auf lange Sicht schon erwarten, dass das auch in der ganzen Wissenschaftsgemeinschaft vielleicht ein Weg ist, um, ja, sich auf Standards auch zu verständigen. Ne?

**I4-22#I: Also für sie wäre es dann auch wichtig zu sehen: In dem Gebiet, in dem ich jetzt arbeite: Was gibt es da? Wer arbeitet daran? Was ist damit verknüpft? Das wäre also wichtig, dass das für sie sichtbar ist....** B: Ja. Auf jeden Fall. **I:...Und dass man darauf zugreifen kann.** B: Aber da habe ich natürlich auch nicht nachgeguckt. Aber ich kann mir... Doch auf den TextGrid-Seiten, weiß ich auf jeden Fall, da gibt es Übersichten der Kooperationspartner. Und es gibt, glaube ich auch, eine Projektliste. Ne? Wenn ich das richtig gesehen habe. **I: Ja, ja. Genau. Projektverwaltung.** B: Ja. Genau. Das man also da die Möglichkeit hat, selbst wenn die Leute ihre Daten noch nicht freigeschaltet haben, dass man fragen kann: Aha. Ich mache hier etwas ganz Ähnliches. Und ob man da wenigstens Leserechte, oder so etwas auf die Daten kriegt. So dass man auch eben diesen Austausch hat, der ja sonst eher dem Zufall überlassen ist. So kann man natürlich nur hoffen, dass möglichst viele Projekte das TextGrid nutzen. Aber ich weiß... Das wissen sie wahrscheinlich auch eher. Ich weiß auch nicht von vergleichbaren Projekten. So. Also dass solche Standardisierungsbemühungen, wüsste ich nicht, dass es das an anderer Stelle noch gibt. Es gibt zwar Projekte, die Material sammeln. Oder man weiß, dass man an bestimmten Stellen gut auf Digitalisate zugreifen kann. Oder es gibt auch Verzeichnisse überhaupt von Wissenschaftlern, die da sich mit ihren Schwerpunkten eintragen, wo man recherchieren kann. Aber dass man so eine, so einen Ort hat, wo sowohl das Material als auch die Werkzeuge angeboten werden und man eben auch eine Übersicht hat, wer das benutzt und mit welchen Quellen, das wäre durchaus auch ein großer Vorteil. **I: Ok. Gut.** B: Das war es schon? **I: Ja. Was heißt schon?** B: Naja, wir haben eine gute Stunde gut herumgebracht.
