# Supplementary material
Source: publisher site journal article supplement (https://www.degruyterbrill.com/publication/isbn/9783110463927/downloadAsset/9783110463927_Interviews.zip)
Supplement: Supplementary file 24 [file I5.pdf › Interviews/I5.pdf]

**I5-1#Interviewer: Erste Frage: Wie würden sie ihre EDV-philologische Erfahrung beschreiben?**

Befragte/r: Also ich kann XML-kodierte Texte lesen. Ich muss es in der Regel nicht selber kodieren, weil die Anwendungen, die wir haben, so gebaut sind, dass ich genau damit nichts zu tun habe. Aber ich kann... Also ich weiß, was eine DTD ist. Wie man eine XSL-Transformierung macht. Aber ich muss es also eigentlich nur rezeptiv beherrschen. Sozusagen was an Technik dahinter steht, kenne ich, aber ich muss es nur benutzen und baue es nicht selbst.

**I: Und wie nutzen sie... Welche EDV-philologischen Tätigkeiten üben sie aus? Wie sieht ihre Tätigkeit genau aus?**

B: Also wir machen hier Texterfassung, vertaggen Texte, verlinken Texte, die vertaggt sind. Was machen wir noch? Ja, also im Wesentlichen geht es darum, digitale Ausgaben zu erstellen. XML-kodiert nach der TEI, so etwas.

**I: Also ist das praktisch Editionsarbeit auch in der (in der) Romanistik? Oder?**

B: Nee, das ist ein germanistisches Projekt.

**I: Ist ein germanistisches Projekt?**

B: Ja, ja.

**I: Ach so!**

B: Ja, also das ist ein bisschen schwierig, also, dass ich hier nun in der Romanistik angestellt bin. Aber von Haus aus ist das ein germanistisches Projekt. Ist Edition... also... müsste man vielleicht auch mal sagen, ist Edition von Dramen aus dem 19. Jahrhundert. Und die werden eben für eine Hybridausgabe neu ediert, werden dann HTML publiziert und im Buchdruck.

**I5-2#I: Ah. Ok. Und was haben sie sich von TextGrid erwartet vor ihrem EDV-philologischen Hintergrund?**

B: Na, ich habe einfach geschaut, was ich eventuell gebrauchen kann. Also ich kenne die Genese von TextGrid so ein bisschen. Und insofern ist die Frage, ob es irgendwann Tools zur Verfügung stellt, die uns für unsere Arbeit nützen. Also will heißen, dass man sauberer oder effizienter arbeiten kann. Dass man beispielsweise Dinge schneller lemmatisieren oder verlinken kann oder sowas also. Nur einfach die Frage, zu sehen, welche Tools so für die tägliche Arbeit da rauskommen könnten.

**I: Ja. Was nutzen sie bisher?**

B: Wir haben ein eigenes Tool für die Texterfassung und ... was wir so sukzessive ausbauen. Also insofern müssen wir hier nicht mit einem XML-Editor arbeiten, vielleicht ein ganz entscheidender Unterschied zu den meisten anderen Projekten.

**I5-3#I: Ja. Und wie war jetzt so einfach mal ihr Gesamteindruck des TextGrid-Lab, das sie getestet haben?**

B: Da ich eine von denjenigen bin, die immer gegen die spitzen Klammern argumentiert haben, hatte ich natürlich mit der Editoransicht keine große Freude. Ich fand es an manchen Stellen etwas unübersichtlich und habe mir also bei den Anwendungen zum Teil andere Sachen vorgestellt. Also gerade bei dem Lemmatisierer hätte ich mir andere Funktionen

gewünscht. Also wenn ich schon... oder den Abgleich mit dem Wörterbuch: Wenn ich so etwas schon habe, dann möchte ich eigentlich mit dem Output, den mir das Lab liefert, dann auch etwas machen können. Also sprich beispielsweise, das mit den Wörterbüchern verbinden oder dergleichen. **I: Ja.** B: Und, also so gesehen hat mir das Lab für das, was ich im Moment brauche, relativ wenig genützt. Und deswegen war ich dann da auch, ja, mit einer interessierten, aber so etwas distanzierten Haltung davor.

**I5-4#I: Könnten sie noch ein bisschen konkretisieren was sie sich vorgestellt hätten? Was für Funktionen sie gerne gehabt hätten? Sie haben jetzt gesagt eine andere Form des Lemmatisierers oder Verknüpfungsmöglichkeiten zum Wörterbuch. Können sie da noch ein paar Sachen nennen, die praktisch auf ihrem Wunschzettel stehen?** B: Auf meinem Wunschzettel steht, dass ich ein Wort markiere und dass das dann, also mir beispielsweise einen Kommentareintrag generiert, oder sozusagen irgendeine Referenz generiert, die ich dann in einer komfortablen Ansicht weiterbearbeiten kann. Sowas würde mir gefallen. Also ist so das für die konkrete Arbeit, was ich im Moment gut gebrauchen könnte.

**I5-5#**Und tja... Ansonsten muss man sehen... Also womit ich mich nicht beschäftigt habe, wenn man das also auch in der Kürze der Zeit und mit den wenigen Ressourcen nicht gut abschätzen konnte ist: Wie funktioniert Nutzerverwaltung im großen Projekten mit vielen Beteiligten. Und solche Sachen wie Versionierung und sowas wäre interessant gewesen. Das konnte man anhand des Ausschnitts nur schlecht einschätzen ob da... oder wie sich das entwickeln wird. Dass es geplant ist, ist ja soweit außer Frage.

**I5-6#I: Gab es Funktionen, die für sie noch völlig neu waren?** B: Nö. **I: Nö. Wie fanden sie denn allein die optische Gestaltung, das Look & Feel des Ganzen?** B: Geht so. Ja. Also, dass man das sich so konfigurieren kann wie man es gerne hätte, das ist ganz angenehm. Es ist ein Werkzeug. Also, es mir relativ wurscht, wie das aussieht. Man benutzt es ja nicht aus Jux und Tollerei. **I: Aber die Individualisierbarkeit finden sie positiv?** B: Ja. Also man ist ja doch relativ schnell festgefahren in bestimmten Ansichten. Und also gerade für sagen wir mal nicht so technikbegeisterte Philologen ist das immer schwierig, sich an neue Bearbeiteransichten gewöhnen zu müssen. Und das führt dann also auch schnell zu Irritationen. So gesehen ist das schon schön, dass man sich das so aufbauen kann, wie man das halt gerne haben möchte oder wie man es gewohnt ist oder so.

**I5-7#I: Und die Navigation, die Organisation des Ganzen? Wie fanden sie die?** B: Erwinnere ich mich gar nicht. Also da wird mir nichts Besonderes aufgefallen sein. Ich nehme an, die ist

sehr stark an den gängigen Benutzeroberflächen orientiert und das macht ja dann insofern auch Sinn, dass man ungefähr weiß, wo man was findet. **I: Ja gut. Das ist eclipsebasiert. Also von daher keine neue Erfindung. Aber... An welchen Stellen hatten sie denn Probleme in dem Test? Wo hat es gehakt? Wo sind sie nicht weitergekommen?** B: So ein Problem war, dass ich das Projekt meines Kollegen nicht beobachten konnte, weil man irgendetwas erst zumachen und neu starten musste, bevor diese jeweilige Rolle aktiviert war. Das konnte mir auch so schnell keiner erklären. Also damit habe ich, glaube ich, ihren Kollegen da sehr, sehr beschäftigt. Über eine halbe Stunde. Und was auch schwierig war, das war bei dem... Was war denn das? Der Lemmatisierer war es nicht! Aber ich habe meine Unterlagen nicht dabei. Insofern... Genau: Wenn man irgendein Wort gesucht hat... Da wo es diese historischen Wortformen gab. Wie war denn das? Ich erinnere mich nicht genau an das Tool. Aber zumindest, wenn man da was... **I: Auch in Verknüpfung mit dem Wörterbuchservice wahrscheinlich.** B: Ja, aber wenn man da etwas gesucht hat, da konnte man... Genau: Dann konnte man Wörter eintragen, die tauchten dann aber nicht auf. Also irgendwie so diese Individualisierung des Lemmatisierers. Da war eine Funktion wahrscheinlich aber auch halb freigeschaltet. Zumindest sagten sowohl Wegstein als auch der...Stefan, hieß er glaube ich. **I: Ja, Büdenbender.** B: ...dass die Funktion in dem Moment hätte gar nicht funktionier... oder gar nicht vorgesehen war. Und gut: Da haben wir dann gespielt und festgestellt: Geht nicht. Und immer diese Sachen sind ja gerade spannend. Ja? **I: Ja klar. Es war eben noch ein bisschen darauf begrenzt: Was läuft schon? Und Kinderkrankheiten, klar.**

**I5-8#Ja, ich habe in ihrem Fragebogen die Frage gefunden: Kann man eigene Tools einbinden? Als Anmerkung. Das ist also ein Punkt, der ihnen wichtig wäre. Können sie dazu noch ein bisschen genauer sagen, was sie sich da vorstellen? Jetzt für ihre Arbeit?** B: Na, ja. Ich habe ja ein Tool, was deutlich komfortabler ist für die Texterfassung als so ein XML-Editor. So gesehen sehe ich keine Veranlassung, warum ich mit was anderem, einem anderen Tool arbeiten sollte. Aber beispielsweise wäre es ja sinnvoll die Ergebnisse in TextGrid abzulegen. Einfach weil sozusagen die Datenhaltung, wenn sie denn so funktioniert wie ich das gerne hätte, ja durchaus sinnvoll wäre, einfach im Grid abzulegen. Und das wäre eine Hilfe. Das macht natürlich nur Sinn, wenn ich mit den gewohnten Sachen weiterarbeiten kann. Insofern, zumal das Tool auch eclipsebasiert ist, und so gesehen funktionieren könnte. **I: Ja. Vielleicht funktioniert es ja noch.** B: Also Herr Jannidis hat gesagt, dass man das irgendwann alles integrieren kann. Ja, dann wird es doch auch so sein. Oder? **I: Bestimmt, ja.**

**I5-9#Was würden sie allgemein zu der Bedienbarkeit und auch Erlernbarkeit des Ganzen sagen?** B: Es ist ok. Also man kann das relativ leicht erfassen. Ich denke, dass man mit einer gewissen Praxis das auch relativ schnell bedienen kann. Also es ist ja immer bei diesen Tools so, dass man, sobald einem die Praxis ein bisschen fehlt, dass man dann auch den Durchblick verlernt. Und wenn ich regelmäßig damit arbeite, dann geht es halt.

**I5-10#I: Wie fanden sie die Rechercheergebnisse, die zurückgekommen sind bei Suchen und Benutzung des Wörterbuchservices?** B: Eher arm. Also da... **I: Von der Menge her? Oder von der Darstellung her?** B: Also bei den Suchwörtern hatte ich häufig das Problem, dass man da auch nichts gefunden hat. Oder dass die Flexionen irgendwie nicht berücksichtigt waren. Also da gab es... Das mit der Darstellung hat mich gar nicht so gestört. Da geht halt ein Seitenfenster auf und man kriegt eine Referenz auf irgendetwas. Aber es muss halt erstmal irgendwas gefunden werden. Und ich glaube mich zu erinnern, dass in zwei von drei Fällen das nicht funktioniert hat.

**I5-11#I: Gut. Jetzt mal weg von dem konkreten Lab, hin zu dem Begriff eHumanities und dem ganzen Gebiet drumherum. Was verbinden sie mit dem Begriff eHumanities?** B: Die Nutzung digitaler Ressourcen und auch die Erstellung digitaler Ressourcen in den Geisteswissenschaften. Also sozusagen so ein Give & Take: Dass man eben einerseits seine Arbeitsmittel elektronisch, in welcher Form auch immer, zur Verfügung hat. Dass man eben meinetwegen wie in einer gigantischen Bibliothek auf sämtliche Texte zugreifen kann, die man braucht, um andererseits die eigenen digitalen Produkte dann auch wieder in so einer, wie auch immer gearteten großen Bibliothek unterbringen kann. Das man sozusagen so eine Infrastruktur hat, die – ja – als unabhängig funktioniert. Das ist eigentlich das Entscheidende dabei. Und auch partiell unabhängig vom konkreten Objekt: Buch oder Handschrift oder was auch immer. Also es wird ja immer erst dann spannend, wenn es Sachen sind, die nicht mehr so leicht zugänglich sind. Ne?

**I5-12#I: Gut. Wenn sie sagen gigantische Bibliothek – also wir reden dann von großen Datenmengen, die zugänglich sein sollen von, also dezentral zugänglich sein sollen. Da besteht ja grundsätzlich die Gefahr, dass man den Überblick verliert.** B: Das ist richtig. **I: Was wäre da eine Lösung? Wie würden sie sich die Organisation des Ganzen vorstellen?** B: Naja. Die Erfahrung lehrt, dass ordentliche Kataloge mit einer freien Suche bisher noch die vernünftigste Trefferquote ergeben. Also man sieht ja eigentlich ganz gut, dass sich Bibliotheken verändert haben und dass man also nach der Digitalisierung der Kataloge doch relativ gut und fix

alles Mögliche weltweit auch suchen kann. So ähnlich stell ich mir das eigentlich auch vor. Also dass sozusagen die Dinge, egal wo, in halbwegs standardisierten Datenbankstrukturen abgelegt sind, dann wird man sie ja auch über eine Suche wieder finden. **I: Nun ist es ja gerade bei einer digitalen Infrastruktur so, dass man ja nicht nur auf Texte zugreift, sondern eventuell auf Wortnetze, Wörterbuchnetze, auch andere Medien, also Bildmedien beispielsweise. Oder auch kommuniziert darüber. Insofern ist das ja ein größeres Netzwerk. Wie stellen sie sich da die Organisation vor?** B: Keine Ahnung. Also ich würde sagen von Nutzerseite ist das ja eher so, dass man möglichst mit der Organisation der Daten nichts zu tun haben will, sondern eine möglichst einfache Oberfläche, die einem hinterher dann sehr übersichtlich die komplexesten Ergebnisse präsentiert. Also das ist ja so ein bisschen der Witz dabei, dass man wahrscheinlich dann die Treffer in... Och, weiß ich nicht, ob man sie flexibel sortiert präsentieren sollen können... aber wahrscheinlich schon. Aber letzten Endes muss man irgendwie eine Sortierung finden. Entweder nach Datenart oder nach Standorten oder nach keine Ahnung, Inhalten, Zeiten, irgendwie so was. **I: Sie sagen: übersichtliche Präsentation von komplexen Daten, auch komplexen Zusammenhängen. Das kann einerseits Sortierung sein, andererseits geht es ja darum, auch sichtbar zu machen, welche Bestände es gibt und welche Verknüpfungen da bestehen. Haben sie mit etwas in der Art schon gearbeitet?** B: Nö. **I: Wie zum Beispiel einem Wörterbuchnetz, das eben verschiedene Verknüpfungen abbildet?** B: Also ich suche gelegentlich mal Wörter über das Trierer Wörterbuchnetz, aber sozusagen sonst wie ich eben drei Bücher nebeneinander gelegt hätte, also sozusagen ohne... sozusagen rein als Recherchemittel.

**I5-13#I: Ok. Können sie sich vorstellen, dass mittels dieser digitalen Möglichkeiten auch neue wissenschaftliche Erkenntnisse gewonnen werden können, die auf konventionelle Art und Weise vielleicht nicht oder nur schwer gewonnen werden könnten?** B: Das kommt darauf an in welchem Bereich. Also es gehen manche Sachen einfach schneller. Dass man also... Ein Kernproblem ist einfach, dass man über Suchfunktionen in E-Texten einfach mal sehr viel schneller Ergebnisse kriegt und dass man die eventuell auch auswerten lassen kann und was nicht alles. Aber mindestens für den textphilologischen Teil hilft einem die Technik wirklich nur als Werkzeug oder es hilft einem sozusagen nicht bei der Hypothesenbildung. Sozusagen. Wenn man keine Frage hat, dann kann man auch die nicht mit den digitalen Sachen beantwortet kriegen. So gesehen sehe ich für mein Feld eher, dass sich die Arbeitsweise verändert, aber nicht unbedingt dass genuin neue wissenschaftliche Erkenntnisse daraus entstehen. **I: Aber wenn sie sagen, dass**

zum Beispiel eine Auswertung stattfinden kann – schneller auch, auch mit größeren Datenmengen. Dann meinen sie damit also nur eine Beschleunigung dieses Prozesses. B: Letzten Endes schon. Ja.

**I5-14#I: Ok. Wenn man eHumanities also als digitale Infrastruktur ... kann man ja als eine Vernetzung von Inhalten bezeichnen, aber auch von Arbeitsprozessen. Also Zusammenarbeit darüber. Welchen Stellenwert würden sie diesem Aspekt zuschreiben und welche Potentiale sehen sie da?** B: Also im Prinzip ist das eine sinnvolle Sache. Also wobei... Wie soll man sagen? Also da... Bei den meisten wissenschaftlichen Projekten ist die Community ohnehin so klein, dass die Leute irgendwie auch miteinander vernetzt sind. Und sie ist andererseits so klein, dass die Konkurrenz um die wenigen Fleischtöpfe so groß ist, dass sie an manchen Stellen gar nicht enger zusammenarbeiten wollen, als sie das könnten. Das ist also partiell dann auch ein bisschen kontraproduktiv. Es erleichtert sicherlich die Sache, weil man kollaboratives Arbeiten besser organisieren kann. Und philologische Großprojekte sind ja alle irgendwie kollaborativ. Jeder, der eine Wörterbuchredaktion oder eine Lexikonredaktion oder auch ein Editionsprojekt, das sind ja alles Teamarbeiten über Jahre, wenn nicht Jahrzehnte. Aber ich würde sagen, man kann eben über eHumanities da... ich würde sagen, die Infrastruktur verbessern und man kann möglicherweise mehr Transparenz erzeugen, wenn man das will. Ob man das will, ist die Frage. Also das sind auch Wissenschaftsideologien, die dahinter stehen. Da sehe ich im Moment also an vielen Stellen eher so einen konservativen Flashback, indem man sagt: Das ist aber meins. Und ich will das gar nicht so öffentlich machen und ich möchte es ganz traditionell in Buchform und nicht frei zugänglich und sowas alles. Also sozusagen das, was an technischen Möglichkeiten da ist, wird glaube ich vom Fach nur sehr begrenzt genutzt, also auch jetzt Möglichkeiten gar nicht angenommen.

**I5-15#I: Ja. Da ist eine große Hürde, die es da gibt. Fallen ihnen noch andere mögliche Hürden ein, die im Bezug auf die Nutzung da sind?** B: Naja. Es ist auch eine Frage der Lesekonventionen, der Medienkonventionen. Einerseits ist es ja toll, dass die Texte elektronisch vorliegen. Andererseits ist das Lesen deutlich unkomfortabler, als wenn man beispielsweise ein Buch hat. Ich meine, man kann die Menge an Informationen, die man sich über digitale Ressourcen sehr schnell auf den Rechner holen kann, die kann man sich im Buch vor einem nicht auf den Tisch legen. Also das geht einfach nicht. Aber die Arbeitsprozesse sind nach wie vor trotzdem sehr stark auf das Medium Buch konzentriert. Und es ist eben ein anderer Umgang mit dem Text auch. Also das mag sich in zwei Generationen auch geändert haben, aber im Moment

ist das eben noch so.

**I5-16#I: Was sehen sie denn als den größten Fortschritt jetzt bei der Idee TextGrid? Also bei dem was dabei rauskommen soll an?**

B: Wenn man es einmal am Beispiel der Editionsphilologie macht, wäre es die Möglichkeit, dass nicht jedes Projekt ganz von vorne anfängt, bestimmte Sachen zu konzipieren und bauen zu lassen und sonstwie. Gleich wieder mit der Einschränkung, ob das gewünscht ist und ob das gemacht wird, ist noch einmal eine andere Frage. Aber quasi Standards und auch standardisierte Werkzeuge zu haben und sowas wie ein Baseline-Tagging für bestimmte Textsorten durchzusetzen. Das wäre schon sehr sinnvoll. Auch philologische Standards lassen sich ausgesprochen schwer etablieren. Also das sehe ich auch ganz... Was heißt kritisch? Ist gar nicht das Wort. Aber ich bin sehr skeptisch inwieweit das angenommen wird. Also das ist eine ausgesprochen schwierige Frage. Dass man sich da auf Dinge einigt, schon innerhalb eines Projekts, geschweige denn innerhalb der Community. Also da... Es scheinen mir die Trends eher genau gegenläufig zu sein. Und so zu sein, dass jeder versucht ganz individuell das nochmal zu erfinden, also nicht etwa einen Standard zu akzeptieren. Das ist einer der ganz großen Unterschiede zwischen Philologie und IT, fällt mir immer wieder auf. Wenn Informatiker wissen, es gibt einen Standard, dann nehmen die den. Und da wird überhaupt nicht mehr diskutiert, auch bei ästhetischen Standards. Es gibt eine Vorlage, die sieht so aus. Die nehmen wir. Und über diese ästhetischen Standards und über Formen von Layout und Präsentation von Inhalten können sich Philologen über Jahre wüst zerstreiten und also da... da gibt es... da ist Standardisierung eher das, was... na, suspekt erscheint. Das hat auch seine Berechtigung. Ist aber sozusagen in dem Bereich, wo wir uns hier treffen immer einer der Hauptkonfliktpunkte, ganz sicher.

**I5-17#I: Wir hatten ja eben gesprochen über die Vernetzung von Arbeitsprozessen. Dann würde ich gerne jetzt noch den anderen Teil besprechen und zwar die Vernetzung von Inhalten. Wo sehen sie da noch Potentiale, die man mit dieser digitalen Infrastruktur ausschöpfen könnte?**

B: Also schön wäre es halt, wenn man..., wenn es so etwas wie ein semantisches Netz über die ganzen digitalen Inhalte gäbe, so dass man eben bestimmte Beziehungen herauskriegt. Die kriegt man aber nur raus, wenn diese Digitalisate auch so verschlagwortet und abgelegt sind, dass da eine Kommunikation möglich wird. Und das braucht natürlich wieder internationale Standards und irgendwelche Verknüpfungen und auch Leute, die das erstmal herstellen, also.

**I: Wenn sie sagen: Da kriegt man vielleicht Verknüpfungen heraus, darüber. Diese Verknüpfungen, dabei könnte sich doch dann auch um neue**

**Erkenntnisse handeln, die man vielleicht in einer anderen Ansicht, also in einer konventionellen Ansicht, gar nicht gesehen hätte. Oder sehen sie da...**

B: Ja, möglicherweise. Also einfach, wenn man mehr Zugriff auf Daten hat. Dann kann man durchaus natürlich auch Erkenntnisse gewinnen, die man so nur schwer gewonnen hätte. Aber sozusagen, wenn ich alle Shakespeareübersetzungen parallel habe, das könnte ich natürlich in Buchform auch überprüfen. Das dauert nur länger. **I: Klar. Ja. Also in dem Sinne wieder die Geschwindigkeit.** B: Ne. Also das... Aber das Wichtige ist eben wirklich, dass man Hypothesen überprüfen kann, die sonst schwer überprüfbar gewesen wären, einfach weil die Beschaffung der Texte zu lange gedauert hätte. So etwas geht jetzt sehr schnell. Das ist sicherlich ein großer Vorteil. Und sozusagen in so einer Perspektive gibt es dann auch neue Erkenntnisse. Aber sagen wir jetzt: Es ist nur eine Beschleunigung. Und manche Sachen hätte man... da wäre der Aufwand früher zu groß gewesen. Hätte man früher nicht gemacht.

**I5-18#I: Und was ist noch das größte Manko an der ganzen Sache jetzt? Sie haben das... gut, eine frühe Version getestet. Wo sehen sie noch die größten Schwächen?**

B: Bei TextGrid? **I: Also bei der Version, wie sie sie jetzt getestet haben und bei dem was sie über die ganze Idee und so wissen.** B: Also die Idee ist ja ganz loblich, zu sagen, also wir wollen für jeden Bereich, den Philologen so abdecken, ein Werkzeug hinstellen, das man dann benutzen kann. Sozusagen im Vergleich zum Anspruch ist das, was bisher da ist, natürlich vergleichsweise arm und auch vergleichsweise... Ja, wie soll man sagen? Also wenn ich den Editor mit einem kommerziellen Editor vergleiche – wobei es also prinzipiell gut ist, dass die TextGrid-Sachen open access sind, was... ich meine, sollte auch sein, wenn es öffentlich gefördert ist. Aber sozusagen, wenn ich den Editor mit einem kommerziellen Editor vergleiche, dann kann der letzten Endes mehr. Also da hat man eben andere Exportfunktionalitäten und einfach mehr Flexibilisierungsmöglichkeiten als das im TextGrid ist. Und sozusagen wenn man mit solchen Sachen wie Oxygen halt arbeitet, dann gewinnt Oxygen ganz klar. Also, das ist halt so. Und so gesehen kann man nur schauen wie sich das Ganze entwickelt. Also ich gucke es mir mit Interesse an, aber bleib bei meinen Leisten. Also im Moment sehe ich keinen großen Grund umzusteigen beispielsweise. **I: Ja. Gut ist jetzt auch nicht der Zeitpunkt.** B: Nein, sicher. **I: Davon ist TextGrid noch weit entfernt.** B: Wobei ne. Also als wir unser Tool entwickelt haben... Wir haben sozusagen in der Entwicklung nur ein halbes Jahr gebraucht. Aber das iterative Verbessern, das hat gut eineinhalb Jahre in Anspruch genommen, weil halt jedes Mal... Und das ist die Zeit, die einem keiner bezahlt. Sozusagen ist das auch die Arbeitszeit von Philologen, die



an der Stelle nicht bezahlt wird. Es muss aber einer das Ding permanent testen, was die Informatiker nicht können, einfach inhaltlich nicht können. Und dann jeweils sagen: Also das funktioniert nicht. Und das funktioniert nicht. Und das ist halt das, was wirklich Arbeit macht. Also erstmal zusammenschrauben – das ist ja ok, aber dann, ... **I: Ja, da haben sie bestimmt Recht.** B: Da habe ich ganz sicher Recht. **I: Ok. Gut. Das wäre es. Vielen Dank.**
