# Supplementary material
Source: publisher site journal article supplement (https://www.degruyterbrill.com/publication/isbn/9783110463927/downloadAsset/9783110463927_Interviews.zip)
Supplement: Supplementary file 25 [file I6.pdf › Interviews/I6.pdf]

**I6-1#Interviewer: Also zunächst würde mich interessieren, inwiefern sie im Bereich EDV-gestützte Philologie tätig sind und welche Erfahrung sie auf dem Gebiet haben?** Befragte/r:

Ja. Gut. Also ich habe ein Editionsprojekt. Das läuft in der Universität X: Y Briefwechsel, historisch-kritische Ausgabe. Und das ist sicherlich die Haupterfahrung, die ich mit EDV-gestützter Edition habe. Dabei ist es so, wir haben bislang... Also da sind wir in einem Umstellungsprozess. Also wir haben, damals wie ich in dieses Projekt eingestiegen bin, das war jetzt vor neun Jahren, acht Jahren, da wurde das mit Word gemacht. Also wir haben relativ komplexe Bände. Ich kann ihnen einfach mal einen so zeigen. Also diese Bände mit einer nicht ganz glücklichen Transkriptionsweise. Schon also ein bisschen anspruchsvoller. Also eine textgenetische Edition ist das und hier haben wir eine ganze Menge von verschiedenen diakritischen Zeichen. All das ist, die meisten Leute glauben es nicht, ist tatsächlich, haben wir mit Word selber hingebastelt. Allerdings mit Hilfe eines Lektoren noch vom Verlag. Also der hat pro Seite genau abgemessen und hat dann gesagt: „So. Das muss einen halben Millimeter höher oder tiefer. Oder da noch mehr Raum oder weniger usw.“ Ne? Das war klar, dass man so nicht fortfahren konnte. Ne? Und dann eben durch Kontakte in Zürich, dann haben wir da beschlossen, dass wir umstellen auf XML. Und dass diese Umstellung läuft - ja das muss man sagen, jetzt seit zwei Jahren. Und die ist nicht einfach. Also. Gut. Das ist erst einmal... Da sind wir jetzt mitten dabei eben, im Übrigen mit Hilfe aus Z. Die DTD hat uns Frau Q geschrieben. Kennen sie ja sicher auch. **I: Ja.** B: Hat die Q uns gemacht. Und mit der arbeiten wir also zusammen. Und. Gut. Das ist so der eine Punkt. Also sicherlich das, was am weitesten geht.

**I6-2#**Das zweite ist die digitale G-Edition. Da gehöre ich ja auch mit dabei mit zum Team. Habe selbst aber praktisch da noch nicht so viel gemacht. Also da ist es so, dass das ja bislang eine reine HTML-Geschichte ist. Und die eben damals... Da wurden einfach Dokumentvorlagen mit Makros definiert. **I: Ja.** B: Und es ist sozusagen eine Minimalauszeichnung, die da eben gemacht wird. Also, weiß nicht, Absätze, Kursivierung, Sperrung, Zitateinschub. Also es ist nicht so wahnsinnig viel. Ja. Und dass da im Prinzip die G-Edition, also es sind ja auch die H... Leute, die sind jetzt ja auch dabei umzustellen. Wir wollen das ja auch nicht mehr so weitermachen, auch nicht mehr mit Word. Insofern von zwei verschiedenen Ecken geht es jetzt darum, Umstellung auf XML zu bewältigen, durchzuführen. Die Ansätze sind ja jetzt ganz unterschiedlicher Art. Also was der R in H macht, das ist ja jetzt, der versucht ja dann speziell einen XML-Editor zu konstruieren. Hat ja da jetzt schon, ich denke, soweit ich es beurteilen kann, erfolgreich das

gemacht für das Drama. Also den Texttyp Drama, weitgehend an TEI angelehnt. Eben mit dem Ziel, dass die Philologen, die dann die praktische Arbeit machen, also die Texteingabe zu machen haben, möglichst wenig mit diesen technischen Dingen befasst sind, also dann möglichst wenig behelligt werden. Es wurde mal... Frau S hatte ja auf einer Tagung mal in Berlin das berüchtigte Wort, dann vieldiskutierte Wort in die Runde geworfen: „Wir wollen keine Spitzklammern sehen.“ **I: Ja. Ja, hat sie erwähnt.** B: Ja, genau. Das ist zum einen nachvollziehbar, wäre jetzt nicht meine Position. Irgendwas... Würde ich ein bisschen anders akzentuieren wollen. Ja. Also das ist jetzt eben diese zweite Säule. G. Und ich speziell bin jetzt auch dabei, für diese digitale kommentierte Gesamtausgabe, die im Netz entsteht, die Briefsektion aufzubauen. Also es gibt noch keine DTD für die Erfassung von Briefen. Und das möchte ich, werde ich jetzt auch dann voraussichtlich mit dem R noch mal angehen.

**I6-3#: Sie sind dann aber in erster Linie als Fachwissenschaftler tätig, weniger mit den technischen Belangen befasst. Oder ist das falsch?** B: Nein, das ist nicht falsch. Also sagen wir mal so: Beim Y ist es natürlich so, dass ich da schon immer wieder mal damit befasst bin. Ich werde es jetzt nächste Woche wieder sein. Es ist nämlich, ein großer Brocken ist noch zu leisten. Das ist nämlich das Problem der räumlichen Positionierung von Grußfloskeln. Das ist in dieser Ausgabe so gelöst, dass es relativ mimetisch gelöst ist. Also das heißt, so, wie man das im Übrigen durchaus auch macht. Also das ist so eine Kompromissausgabe hier. Sie sehen das. Sie ist teils normiert durch den Blocksatz, also somit nicht zeilengetreu. Aber eben in der Grußformel mit dem Anspruch: Hier, ganz weiten Einzug. Dann hier diese eine... Oder hier, dass es da so aussieht. Ne? Oder hier zentriert. Gut das ist jetzt ein simpler Fall, aber... Oder hier so. Ne? Das nicht überlappend. Das schon überlappend. Ja? Das sind jetzt die Herausforderungen für die L-Kodierung. Das ist das Problem. Kriegen wir das hin? Ja oder Nein? Müssen wir möglicherweise darauf verzichten, das so hier deskriptiv, dokumentarisch zu lösen. Die Q hat uns da jetzt eine DTD, also verschiedene Elemente zur Verfügung gestellt. Und ich werde jetzt, werden sie nächste Woche damit zubringen mit dem Spy, mit dem wir arbeiten, bzw. werden uns wahrscheinlich umstellen auf den Oxygen, das dann einzugeben. Ich muss das mir an der Handschrift und da muss ich es eben... Also man kann es nicht immer nur jetzt, sagen wir mal so, rein philologisch am grünen Tisch entscheiden. Man muss da wirklich sich mal in die, wenn ich das so sagen darf, Niederungen oder in die konkrete Realität begeben, mit der meine Mitarbeiter sich befassen. Aber faktisch ist es natürlich tatsächlich so, dass es sehr schwer ist. Ach, da auf dem Laufenden zu bleiben und Wissenstand zu halten. Also am Anfang hatten wir noch einen

gemeinsamen Wissensstand. Ja? Dann haben wir darüber diskutiert, muss, was weiß ich, Text so und so Kind-Element sein von Ding, oder besser nicht, oder usw. in dem Maße wie ich hier dann natürlich auch, das war ja dann auch gleichzeitig meine gewissermaßen Startphase hier in W, also in dem Maße wie ich dann da mit anderen Sachen konfrontiert war, konnte ich das nicht aufrechterhalten. Also da habe ich jetzt natürlich ein Wissensdefizit gegenüber meinen Mitarbeitern. Das ist ganz einfach so. Und ja. Das läuft, soweit die das jetzt gut im Griff haben, ist das kein Problem und auch völlig in Ordnung. Also die grundsätzlichen editorischen Entscheidungen, die treffe ich ja dann auch und im Kontakt mit ihnen und die setzen das dann um. Aber jetzt in diesem Spezialfall etwa haben die gesagt: Nein, das wollen wir nicht. Wäre besser, wenn du das selber machst. So. Und jetzt.

**I6-4#I: Also sie befassen sich dann auch direkt mit dem XML-Editor?** B: Ja natürlich. Muss ich. Muss ich. **I: Und machen dann die entscheidenden Dinge auch selber...** B: Muss ich. Ja. Ja. Ich finde das auch richtig so und würde mir ohnehin da mehr Zeit wünschen. Das ist immer eine Zeitfrage. Das heißt, man ist, was jetzt neu ist, das ist jetzt eine neue Erfahrung. Da ist jetzt, ja wie soll ich sagen, wie eine Wand zwischen mir und dem Objekt. Ja? Früher, solange man jetzt noch mit Word gearbeitet hat, konnte ich selber etwas machen. Ne? Ich habe das gemacht. Ich habe unmittelbar das gesehen, was ich produziere. Jetzt ist das schwieriger geworden. Und wir brauchen jetzt, also... Ne? Also darüber könnte man natürlich auch lange reden und lange das auch überlegen. Aber das ist ein gewisses Problem auch. Ich empfinde es also als ein Problem. Das ... **I: Also es ist noch eine Hürde da, die durch die Umstellung auf XML und den zu erlernenden Umgang mit Editorprogrammen da ist. Denen müssten sie sich dann mehr widmen können, mehr Zeit dafür haben, oder?** B: Ja, natürlich. Ganz genau.

**I6-5#I: Vor diesem Hintergrund ihrer EDV-philologischen Tätigkeit: Was haben sie von TextGrid erwartet, als sie jetzt zu dem Workshop gekommen sind? Wie waren ihre Erwartungen?** B: Ja, gut. Ich denke ich hatte vielleicht zum Teil falsche Erwartungen. Also das heißt, deswegen war ich ein Stück weit auch enttäuscht auch von diesem Termin. Also, ich denke er hat das, wenn es darum ging, TextGrid einfach vorzustellen, oder eine Ahnung zu vermitteln, was es einmal leisten können sollte, in Zukunft, hat er ja sein Ziel absolut erfüllt. Ja? Ich hatte darüber hinaus noch die Erwartung... Ich hatte darüber hinaus erwartet, dass diese, was ich gesagt habe, diese Barriere, diese Wand ein bisschen abgebaut wird. Also das heißt nach dem Motto, ich habe wirklich sehr wenig Zeit zur Verfügung, muss mir das Ganze wirklich abknapsen. So. Und dann hatte ich - dieser Freitag war schon schwer genug, weil dummerweise noch mitten im

Semester. So. Und dann habe ich mir das möglich gemacht und dann dachte ich mir: So, jetzt wirst du da richtig zugeballert und wirst richtig gefordert. Ja? Und kriegst da mal ein bisschen wieder... Du kommst an das Objekt ran. Wirst da mehr herangeführt. Das ist so nicht geschehen. Also es waren einfach diese Beispiele waren einfach sehr wenig. Ne? Ich will nicht behaupten, dass ich die sofort lösen konnte. Ich habe auch Hilfestellung gebraucht. Aber dann, sagen wir mal so nach einer Stunde hatte man das dann. Das waren ja dann drei kleine Aufgaben, die dann auf diesem letzten Blatt standen. **I: Ja.** B: Und dann. Das war jetzt was jetzt... Ich hatte mir einfach gewünscht, verstehen sie, so einen ganzen Katalog, meinetwegen: „Suche jedes zweite Wort dort nach und mache das“ und irgendwie so. So richtige Aufgaben wo man etwas tun muss. Wo man mehr gefordert wird. Und das war dann leider am Nachmittag nicht mehr der Fall und dann trat so ein bisschen Leerlauf ein. Also ich hab dann, das sehen sie ja dann an ihren Aufzeichnungen. Ich habe dann ein bisschen auf den TEI-Seiten rumgeklickt und so. Insofern war ich ein bisschen enttäuscht. Also da hatte ich... Aber das waren eben möglicherweise jetzt falsche Erwartungen. Ne? Ich hatte zusätzlich über irgendwie so...

**I6-6#I: Ja. Also da ist jeder mit unterschiedlichen Erwartungen reingekommen. Deshalb ist es für uns auch sehr interessant, das zu erfahren und entsprechend künftig auf Erwartungen zukommen, Erwartungen entgegenzukommen auch. Aber was hatten sie denn so für einen Gesamteindruck von dem Lab an sich? Von dieser Forschungsumgebung? Von dieser Ansammlung von Tools, die bisher in dieser Version bestanden?** B: Also insgesamt überwiegend positiv würde ich sagen. Überwiegend positiv, manche vielleicht ein bisschen skeptischen Note, Einstellung. Und zwar das betrifft zum einen... Gut. Jetzt nehmen wir einmal etwa diesen Wörterbuchservice. Das ist so ganz schön. Ja? Das ist klar. Die Frage, die sich da nur stellt, ist die von Nutzen und Aufwand. Also das heißt Nutzen, wenn jetzt zum Beispiel wichtige Lexika dort nicht verfügbar sind, wie etwa der Adelung oder der Zedler oder so. Zum einen. Wenn jetzt zum anderen jetzt nicht soviel Mühe macht, weil man ja sowieso online arbeitet, dann klick ich eben schnell meine ohnehin schon vorgemerkten Seiten auf, vom Grimm oder vom Zedler und füge das dann ein. Da fragt man sich... Also das ist einfach so ein Fragezeichen. Ne? Was man so in den Raum stellt. Ist ja der Nutzen Kosten... Wie ist die Nutzen-Kosten-Relation da? Wir haben ja sehr viel Zeit investiert. Logischerweise. Ne? Und damit es jetzt nun wirklich ein ganz großer Nutzen wird, müsste da noch ein bisschen mehr sein. Ne? **I: Was fänden sie denn, würde einen Mehrwert ergeben, den man mit den zur Verfügung stehenden Mitteln erzeugen könnte? Also den digitalen Möglichkeiten die es**

**gibt.** B: Ja. Ja. Naja. Also sagen wir einmal so: Ein Mehrwert wäre natürlich, wenn tatsächlich sämtliche Onlinelexika da drauf wären. Das wäre natürlich logischerweise schon, das wäre dann natürlich schon ein Service.

**I6-7#I: Inwiefern sehen sie die Möglichkeit mit den zur Verfügung stehenden digitalen Mitteln auch eventuell neue wissenschaftliche Erkenntnisse zu erlangen? In dem Sinne, dass man nicht einfach nur die konventionelle Arbeit digitalisiert, sondern eben auch mit diesen digitalen Instrumenten neue Erkenntnisse erlangen kann. Also anders forschen könnte zum Beispiel.** B: Genau. Also das geht jetzt in Richtung Open Source, oder beziehungsweise nein. Ja doch. Also das was so damit verwandt ist zumindest. Wenn ich die Frage richtig verstehe, geht es jetzt eben darum: Was ist der Fortschritt für die Scientific Community, wenn dann ja... Also TextGrid ist ja so ein Nehmen und Geben. Ich bekomme Service von dem. Aber dafür ist ja dann meine Arbeit öffentlich zugänglich. Ne? **I: Das ist auch ein Punkt. Ja.** B: Ist auch ein Punkt. So habe ich die Frage so verstanden.

**I6-8#I: Also die Frage ist auch interessant, die hätte ich auch gestellt. Ich habe jetzt eher gedacht: Was erzeugt einen Mehrwert? Wo ist der Nutzen darin? Kann das so weit gehen, also dass es nicht nur die konventionelle Arbeit einfacher macht und schneller macht, sondern ist es auch möglich, mit diesen digitalen Instrumenten anders zu forschen? Erkenntnisse zu gewinnen, wissenschaftliche Erkenntnisse zu gewinnen, die auf konventionellem Wege vielleicht nicht, oder nur sehr schwer möglich wären. Im Umgang mit großen Datenmengen beispielsweise?** B: Also ich kann mir das vorstellen. Ich meine das ist die prinzipielle Frage: Was nutzt es, Texte digital zur Verfügung zu stellen? Ne? Was nutzt es? Natürlich eines ist diese unter Punkt Volltextrecherche. Das ist für sprachwissenschaftliche Untersuchungen, denke ich, auch jeden Fall. Und für bestimmte literaturwissenschaftliche Fragen auch. Ja. Das ist ja logisch. Ich kann jetzt natürlich größere, riesige Textkorpora nach bestimmten Wörtern absuchen, wofür man früher umständlicherweise eine ganze Generation verbracht hat, um eine Konkordanz zu erstellen. Also das ist klar. Aber das ist natürlich nur eine von ganz ganz vielen Fragestellungen. Ne?

**I6-9#**Also ich sehe für mich jetzt, ich bin eben Literaturwissenschaftler, das mag sich für einen Sprachwissenschaftler anders darstellen. Als Literaturwissenschaftler wo ich eher in den seltenen Fällen so irgendwelche Wörter suche oder so etwas, habe ich das TextGrid jetzt primär als eine Serviceeinrichtung verstanden, die zugleich..., die eben dazu hilft, Texte in einer akzeptablen Form digital herzustellen und allgemein zur Verfügung zu stellen und damit auch eine gewissen

Standardisierung leistet. Ja? Dass es nicht jeder irgendwie so macht und der andere macht es so und der andere macht es so. Dann haben wir wieder wie Kraut und Rüben. Sondern, dass es dann irgendwie Normen also etwa die, weiß nicht, TEI-Normen dadurch durchgesetzt werden können. Das, würde ich mal sagen, ist der primäre Effekt. Also ich sehe jetzt nicht... Also das wäre so, könnte man sagen, wenn man sagt: Also Erschließung von, zur Verfügung stellen von Texten. Es ist eine Art Grundlagenforschung. Also wenn sie ... Wenn man wissenschaftliche Erkenntnis, oder wissenschaftliche Leistung so definiert, dann würde ich sagen: Ja. Ja. Da ganz eindeutig.

**I6-10#I: Gut. Aber den Punkt, den sie eben angesprochen haben und jetzt auf diese Frage eigentlich bezogen haben: Open Source, Geben und Nehmen, dass heißt auch Kooperation und Vernetzung von Inhalten, Austausch von Inhalten. Wo sehen sie da die Potentiale? Und gerade aus ihrer Perspektive.**

B: Also zunächst einmal auch eher so im pragmatischen Bereich, im praktischen Herstellungsbereich. Was nämlich ganz fatal ist, dass man zuwenig voneinander weiß. Dass allenthalben irgendwelche Leute an selben Problemstellungen sitzen, aber nichts voneinander wissen und jeder das Rad neu erfindet, um es mal ein bisschen platt zu sagen. Also dass da, dass das ein Instrument ist, was da den Austausch fördert. So würde ich das sagen. Ansonsten habe ich, dass ich natürlich, ja...Also ich dann halt eben auch kenne... Was weiß ich? Jetzt zum Beispiel wird die Y-Ausgabe wird sich jetzt... Also wir haben Kontakte mit der K-Ausgabe und wir werden jetzt auch in Kontakt mit der V-Ausgabe aufbauen, weil dieser Austausch einfach essentiell ist. Nicht weil wir dadurch für Y bessere Erkenntnisse gewinnen, das sicherlich nicht. Sondern, ja, man tauscht sich einfach aus. „Wie macht ihr das?“ Da gibt es ja eine ganze Fülle von allen möglichen Punkten. Ja? Das kann man nicht hoch genug ansetzen. Diesen Austausch.

**I6-11#I: Es spielt ja auch eine Rolle, wenn viele verschiedene Orte an einem Projekt zusammenarbeiten, oder man eben mit Teams an verschiedenen Orten zusammenarbeitet. Wenn sie jetzt sagen in Zürich ist ein Teil, dann der andere... Was kommt aus Z? Dann W.**

**Das ist ja alleine auch eine Frage der Logistik in vielerlei Hinsicht. Wie sehen sie da die Möglichkeiten, die jetzt über das, was durch das Internet möglich ist, schon bestehen? Also was könnten sie sich da vorstellen? Auch perspektivisch.**

B: Sie meinen jetzt innerhalb des Projekts, oder projektüberschreitend? **I: Projektüberschreitend.** B: Projektüberschreitend. Ja. **I:**

**Was den Austausch angeht...** B: Wir haben sozusagen unser Problem... Klar. Das, das war natürlich auch zu lösen. Wie macht man das? Wie tauscht man Daten aus zwischen W und X, wenn man jetzt das nicht über den E-Mailversand machen will. Ne? **I: Genau.** B: Das ist klar.

Gut. Aber das haben wir soweit gelöst. Im Prinzip. Also sie meinen projektübergreifend. **I: Ja. Organisatorisch. Also man nehme zum Beispiel den in TextGrid enthaltenen... Die Projektverwaltung. Die sie ja gesehen haben. Dass wir das vielleicht von der Perspektive aus betrachten. Es wird ja angestrebt, eine digitale Infrastruktur aufzubauen. Das kann man ja vereinfacht so darstellen, dass das eine Vernetzung von Inhalten, aber auch von Arbeitsprozessen darstellt. Über eine Plattform. Mal auf einen recht kleinen Nenner gebracht. Und da würde mich interessieren, wie aus ihrer Perspektive da Potentiale gesehen werden. Aus ihren Erfahrungen heraus, was Zusammenarbeit angeht und Vernetzung von Inhalten. Und...** B: Kann ich jetzt so schwer beantworten. Also wie gesagt, diese praktische Ebene. Organisatorische? Das habe ich ja praktisch vorhin schon beantwortet. **I: Ja.** B: Also da, denke ich, ist es auf jeden Fall ein Nutzen.

**I6-12#I: Ja, da würde mich interessieren, wie man das konkreter, wie sie da konkreter sich das vorstellen? Was an Infrastruktur optimiert werden könnte?** B: Ja. Ich meine, ich kann ihnen einfach mal sagen, das Problem, was wir jetzt zum Beispiel in X haben... **I: Genau.** B: Weshalb wir uns unter anderem mit den V-Leuten auch zusammentun. Das ist tatsächlich ein Dateiverwaltungssystem. Ja? Die haben einfach Erfahrung mit Subversion. So. Und wir bauen jetzt auch in X... Wir haben jetzt auch Subversionaufbau. Ja, und die ganze Fülle von Fragen, die man sich dabei stellt: Wie macht man das? Was gibt es zu beachten? Was habt ihr für Erfahrungen. Welche Konsequenzen hat die Entscheidung? Ja? Wenn man diese einzelnen Repositories legt oder definiert und so weiter. Ja? Und um all das zu besprechen werden wir uns jetzt dann mal mit denen zusammensetzen. Also ich denke man muss immer von diesen konkreten, praktischen Problemen ausgehen, um sich zu überlegen: Wie könnte TextGrid das unterstützen? **I: Genau.** B: Oder was müsste man machen. Genau.

**I6-13#I: Das ist auch das Ziel der Erhebung. Also den Bedarf feststellen. Was könnten sich die potentiellen Nutzer vorstellen? Also was stünde praktisch auf dem Wunschzettel. Da ist natürlich zunächst einmal die Problemformulierung auch ganz wichtig, aber oft kommt dann schon irgendwie: „Ja, ich habe mir jetzt erwartet, dass vielleicht das und das schon möglich ist.“** B: Ja. Richtig. Also. Ja gut, aber da kommen sie vielleicht noch drauf. Also ein Punkt ist ja, dass der XML-Editor... Ich weiß nicht, ob die anderen dazu etwas sagen. Könnten wir vielleicht mal eine ganz kurze Pause machen, Herr I? Ist das möglich? **I: Kein Problem.** (Pause) **I: Gut. Ja, wir waren stehengeblieben bei: Welche Probleme treten auf?** B: Ja, genau. **I: Im Sinne der Reaktion auf solche Probleme und Anpassung ist ja auch der Punkt**

**Individualisierbarkeit eines solchen Programms von Bedeutung. Könnten sie dazu etwas sagen?** B: Ja. **I: Was ist da aus ihrer Sicht wichtig?** B: Also das scheint ja fast das allergrößte Problem zu sein. Und zwar insbesondere im Hinblick auf den XML-Editor. Also es war so. Ich habe mich ja mit der Q da in Z ausgetauscht, die war ja mit dabei, hatte teilgenommen. Hatte auch unsere Y-DTD mitgebracht. Und ihr Urteil war dann am Ende, dass sie gesagt hat: Dieser XML-Editor ist zu wenig komplex. Mit dem könntet ihr nichts anfangen. Gut. Ich sage es jetzt einfach mal so: Das war ihr Urteil. Also sie hat das sehr skeptisch gesehen und wenn das nun stimmt, dann ist das tatsächlich ein Problem. Ne? Weil es würde ja bedeuten, dass man zugunsten des gemeinsamen Nenners die Individualisierbarkeit einschränkt. Und das ist dann... Ja, also... Das ist schwierig. Ich denke das ist tatsächlich kein einfaches Problem. Dieser Spagat zwischen Standardisierung, dem wünschbaren Ausmaß an Standardisierung und Normierung einerseits. Und dann aber der notwendigen Individualisierbarkeit zu machen. Das scheint mir die größte Herausforderung. Und speziell für diese Kodierungsgeschichten zum Beispiel.

**I6-14#I: Wenn wir jetzt dabei sind... Also das als größte Schwierigkeit, als größtes Manko. Damit verbunden sind ja dann auch immer Chancen. Also positiv gesehen. Welche Chancen sehen sie noch? Außer dass evtl. dieser Spagat eben zu schaffen wäre, was eben ein großes Problem darstellt. Was sehen sie für Möglichkeiten? Was wäre ein großer Fortschritt?** B: Ja die Chancen zum Beispiel, die wären natürlich auch wieder ganz konkret, dass man ein Stück Autonomie zurückgewinnt. Als Philologe. Sage ich mal. Ne? Das ist natürlich die Erfahrung von Y und jetzt auch ein Stück weit bei G, dass man natürlich sich in eine neue Abhängigkeit begibt. Die also... Wobei man natürlich klar sagen muss: Man war früher ja auch abhängig. Man war früher vom Setzer dann abhängig, wenn man jetzt nicht selbst ein professionelles Layout-Programm, wie Indesign oder Quark bedienen konnte, war man natürlich auch irgendwie abhängig. Aber es nicht jetzt natürlich schon so. Die Abhängigkeit ist jetzt nicht mehr so schön zeitlich getrennt. Na sozusagen, ich mache jetzt mein Geschäft und dann gebe ich es dem Setzer und kümmerge mich nicht mehr darum. **I: Ja.** B: Sondern das ist ja jetzt, diese Trennung ist ja jetzt aufgehoben. Ne? Also das heißt, man ist jetzt schon angewiesen auf andere Leute. So und nun ist es ganz einfach ein praktisches Problem. Wir zahlen eben jetzt für die Hilfe aus Z, also in dem Fall Q, sehr viel Geld. Ja? Das kann Y... Also das ist nicht einfach für uns, weil wir keine Sachmittel kriegen vom S Nationalfond, sondern nur Personalkosten. Das ist nur deshalb möglich, weil es eingeworbene Sponsorengelder gibt. Ne? Noch! Bei G gibt es die zum Beispiel nicht. Das ist noch nie irgendwie gefördert worden. Also da gab es nur immer mal



punktuell Druckkostenzuschüsse. Die Arbeit ist dort niemals gefördert worden. Weder von irgendeiner Uni, noch von sonst einer Förderinstitution. Das heißt, die G-Edition kann sich so jemanden überhaupt nicht leisten. Und der R macht das alles unentgeltlich. Und, ja, natürlich dauert das länger, wenn er mal Zeit hat. Der hat auch genügend andere Sachen eigentlich um die Ohren. Ne? Ja gut. Die in H haben das eigentlich geschickt gemacht, dadurch dass sie es eingebaut haben in die eigene Lehre. Also dass sie zum Beispiel, das finde ich ja so ein absolutes Idealkonstrukt, muss ich tatsächlich sagen, wenn ich die Informatiker im Hause für philologische Belange interessiere und sage: Aufgabe Diplomarbeit: „Konstruiere ein Raster im XML-Editor für Dramen“. Ist doch super. **I: Ja klar.** B: Das ist eigentlich ideal. **I: Ja.** B: Aber trotzdem. Es ist schwierig. Und es stellt sich jetzt auch heraus, dass es schwierig ist für die Briefedition, die ich aufbauen will bei G. **I: Also wäre es wichtig...** B: Und das heißt, meine Erwartung wäre eben schon gewesen, dass man... Also, dass ich durch das TextGrid so ein bisschen Hilfe krieg. Vielleicht nicht notwendig, dass ich sozusagen auf Klick den super, das super XML-Schema gleich habe für meine Bedürfnisse. Aber sagen wir einmal so, dass die Schwelle doch ein bisschen reduziert wird, weil es ist klar. Oder ich nehme dasselbe Beispiel jetzt, ich möchte im nächsten Seminar, brauche... Im nächsten Semester mache ich ein Projektseminar. Werde ich diese G-Briefedition in Angriff nehmen. So dass ich die sozusagen aus dem Seminar heraus entstehen lasse. Die Frage ist: Wie erfassen wir die Texte? Ich kann... Ich muss bislang immer noch in Word arbeiten. Und das ist natürlich eigentlich lästig. Ich habe noch nicht kein XML-Schema oder keine DTD. Und da ist es einfach so, wenn ich mit dem R spreche, dann sagt der: „Ja, da gehst du mal auf Roma. Ach warte mal, das ist www. so und so. Roma. Ja und dann klickst du dir das zusammen und...“ Wir haben das mal zusammen gemacht und da habe ich gesagt. „Ja, du. Jetzt erst mal Stop.“ Das hat ja keinen Sinn. Das ist Quatsch. Das heißt mit anderen Worten, ich bin extrem abhängig. Ne? Also das wäre wirklich...

**I6-15#I: Also sie bräuchten ein intuitiv nutzbares System, bei dem man nicht ungedingt für die Aufgabe, die man selber machen will, noch jemanden bräuchte, von dem man abhängig wäre. Also einen Fachmann der damit umgehen kann. Oder? Was gehört da noch dazu?** B: Ja. Also ein Stück weit Autonomie. Also ich würde vielleicht nicht... Das ist wahrscheinlich illusorisch, dass man sagt... Aber ja doch. Vielleicht doch. Wenn man zum Beispiel... Es ist mir ja klar, also das soll ja dann auf diese Website gestellt werden. Das ist ja logisch, dass man da jemanden braucht. Da muss ja die ganze Navigation verändert werden. Und und und. Aber das sind ja Sachen, die jetzt von XML unabhängig... Aber das ist ja noch einmal eine neue Aufgabe.

So eine Webpräsenz zu basteln. Zunächst einmal geht es ja nur darum, das sauber in XML auszeichnen zu können. Ja? Und naja, es sollte vielleicht möglich sein, dass man... Was heißt intuitiv? Also irgendwie systematisch geordnet, wo ich eine Anleitung bekomme. Dass ich sage, also was weiß ich: „Bestimme zuerst die Parameter der Tiefe deiner Auszeichnung.“ Überlege dir zuerst: „Willst du Lateinschrift auszeichnen? Ja oder Nein?“ Also dass man das zum Beispiel... Man könnte sich ja vorstellen, eine Anweisung: Wie bastele ich mir so eine DTD für meine individuellen Bedürfnisse? Da kommt der eine der sagt: „Ich mache die Briefedition. Ich zeichne Lateinschreibung innerhalb von deutscher nicht aus.“ Der nächste sagt: „Ah, unbedingt. Ich will es natürlich schon auszeichnen.“ Ja? Dass das jeder machen kann. Und das heißt, dass ich so einen Parameter habe. Dann kann ich anwenden. „Kommt mit rein. Kommt nicht rein.“ Und dann wirft der mir mal etwas aus und dann kann ich mit arbeiten und dann stelle ich fest: Hoppla, hier stimmt die Hierarchie jetzt noch nicht. Jetzt will ich die Hierarchie ändern. Ne? Da müssen die Kind-Elemente anders geordnet und sortiert werden. Und so weiter. **I: Verstehe. Also es geht so in die Richtung „Hilfe“, Dokumentation nur mit einem eher fachwissenschaftlichen Aspekt auch. Also, dass es nicht wie bei Word ist, dass einem ein Männchen auftaucht das sagt: Machen sie das und das zum speichern.** B: Nein. Nein, nein. **I: Sondern eher wie die ganze XML-Erfassung sich aufbauen ließe.** B: Ja. Ja. Ja genau. So eine Hilfe. Wie gesagt, ich habe keine... und ich stelle das auch an meinen Studenten jetzt fest. Die haben keine Angst vor spitzen Klammern. Also das ist Quatsch. Aber es ist so, wie es sich im Augenblick präsentiert, ist es eine relativ hermetische Sache. Es ist einfach... Es ist ingroupmäßig. **I: Verstehe das.** B: Und das ist irgendwie schade. Das ist schade, weil das ... Na also... Das ist klar. Ich denke mal man bracht dann... Natürlich braucht man dann manchmal Fachleute und so. Wenn man dann eine Datenbank aufbaut sowieso. Und das ist dann alles, sind dann alles schwierige Sachen. Aber, wie gesagt, einfach zum Beispiel jetzt eine ganz simple Texterfassung nach, sagen wir so und soviel Parametern, die habe ich ja. Das schaffe ich aber jetzt im Augenblick einfach nicht. Da ... **I: Da müsste man jetzt an der Bedienbarkeit und Erlernbarkeit auch noch etwas machen dahingehend.** B: Also der Weg dorthin, der Weg dorthin. Die Bedienbarkeit dann in Oxygen oder im Spy, je nachdem mit was man arbeitet, ist kein Problem. **I: Ja.** B: Das sehe ich überhaupt keine.... Also das kann dann so komfortabel sein. Also das muss kein Koloss sein. Ne? Also, aber wie gesagt, der Weg dorthin ist schwer. Finde ich, das ist eine richtige Hürde.

**I6-16#I: Gut. Das wäre es. Vielen Dank.** B: Ja. Dankeschön.
