# Supplementary material
Source: publisher site journal article supplement (https://www.degruyterbrill.com/publication/isbn/9783110463927/downloadAsset/9783110463927_Interviews.zip)
Supplement: Supplementary file 26 [file I7.pdf › Interviews/I7.pdf]

**I7-1#Interviewer: Zunächst würde ich gerne etwas über ihre Arbeit wissen. Befragte/r: Ja. I: Und zwar speziell über ihre EDV-philologische Arbeit und Erfahrung. Also wie sind Sie da tätig, und wie würden sie ihre Erfahrung beschreiben?** B: Also jetzt an der Akademie arbeite ich in dem Projekt „Digitale Akademie“, oder in dem Bereich „Digitale Akademie“, das heißt, wir kümmern uns einerseits sehr stark um das Online-Segment. Ja? Das bedeutet Content-Management-gestützte Webseiten, Entwicklung für unsere Projekte. Das kann alles sein, von einer musikwissenschaftlichen Datenbank bis hin zu naturwissenschaftlichen Projekten, oder auch geisteswissenschaftlichen Projekten, also wo man viel mit Textmaterialien zu tun hat. Ja, und dann weiterhin natürlich schon in diese Richtung Texterschließung und Texterfassung in den Geisteswissenschaften. Also das wäre so der Bereich. Was für Erfahrung bringe ich mit? Ich bin seit 2004 als selbständiger Entwickler tätig gewesen im Onlinebereich und habe die dementsprechenden Erfahrungen auf dem Gebiet mit der üblichen Internettechnologie. Also HTML, CSS, PHP-Entwicklung, SQL-Datenbanken etc., auch natürlich damit verbunden XML, wobei ich das jetzt nicht als mein Spezialgebiet sehen würde. Man hat natürlich im Rahmen von Projektumsetzungen immer wieder, also bei einer PHP-Programmierung kommt es ganz oft, dass Daten XML-basiert sind und dann setzte ich mich schon damit auseinander. Ja? XML im Sinne von Dateiauszeichnungen ist nicht meine Kernkompetenz, wobei durchaus hier an der Akademie Bedarf in diese Richtung besteht. Ja? Das wäre so im Groben das Feld in dem ich arbeite.

**I7-2#I: Aber Editionsarbeit ist nicht der Schwerpunkt bei ihnen? Also es waren jetzt viele Editionswissenschaftler, die selber...** B: Mein persönlicher Schwerpunkt ist es sicher nicht, weil ich eher tatsächlich der Entwickler hier bin. Ja? Wobei wir natürlich Projekte hier im Akademieprogramm haben, die ganz konkret Editionen herausgeben. Das kann... Also das sind zum einen musikwissenschaftliche aber auch viele geisteswissenschaftliche Editionen. Wobei das in den Projekten selbst liegt. Dass heißt, die arbeiten noch ganz konventionell. Das sind oft einfach Printeditionen. Aber das ist durchaus angedacht, dass wir das Segment stärker einsteigen und auch Online oder elektronische Editionen anbieten. Und zum Teil auch schon angeboten haben. Ein Beispiel hier im Hause ist das Inschriften-Onlineprojekt, was im letzten Jahr umgesetzt worden ist. Das ist praktisch die Digitalisierung, die Onlinestellung dieser Inschriftenreihe, die hier von der Kommission für Inschriften herausgegeben wird. Das ist so auch ein Bereich, wo es ganz konkret um solche Editionsverfahren auf elektronischem Sektor geht. Ja.

**I7-3#I: Gut. Also vor dem Hintergrund ihrer Tätigkeit: Was waren ihre Erwartungen, als sie an dem Workshop teilgenommen haben? Oder was war der Grund aus dem sie dorthin sind und mit welchen Erwartungen sind sie hingegangen?** B: Ja gut. Ich habe das hier über den Dr. K, also über meinen Kollegen, gehört, dass das schon länger im Schwange ist, habe das immer wieder über die entsprechenden Seiten im Internet auch gehört, dass TextGrid entwickelt wird. Ich bin einfach ganz unbefleckt hingegangen, weil ich gedacht hatte, ich gucke mir das auf jeden Fall einmal an, weil wir wie gesagt, wir auch in dieses Segment stärker reinwollen, ich im Prinzip auch immer wieder auf der Suche nach einem Tool bin, mit dem man in einer gewissen Art und Weise Auszeichnungen vornehmen kann. Da geht es dann... Was ich so... Ja, das einzige, was ich im Hinterkopf habe, das ist auch ganz konkret. Ich bin so ein bisschen auf der Suche im Moment nach einem Tool, womit ich innerhalb dieses schon angesprochenen Inschriftenprojektes Redakteuren die Möglichkeit geben kann, Texte auszuzeichnen, die ich dann später importieren kann mit einem Importscript in eine Onlinedatenbank. Und da bin ich so ein bisschen auf der Suche und gucke, was für Technologien ich da einsetze. Also ob das jetzt OpenOffice ist oder ob das jetzt tatsächlich TextGrid sein kann etc. Da bin ich so ein bisschen auf der Suche.

**I7-4#I: Ah ja. Wie war dann ihr Gesamteindruck?** B: Vom Shop? Vom Workshop? **I: Also vom Lab. Also sowohl als auch.** B: Gut. Sagen wir mal so. Ja, der Workshop an sich war ja prima organisiert. Hat mir gut gefallen. Was wir vorhin schon, als sie noch nicht aufgenommen haben, angesprochen haben: Klar, natürlich gibt es diese Bugs in der Software im Moment und die ist auch nicht so weit ausgereift, dass ich sie jetzt in die nähere Auswahl ziehe für das Inschriftenprojekt, weil das akut jetzt im März anfängt, das heißt da ist mir das noch zu unstabil. Das kann ich auch den Redakteuren noch nicht verpassen, das Teil. Mich hat es gefreut, dass hier ein Eclipse-Projekt, ja, als Grundlage herangezogen wird, denn das ist auch meine IDE [Integrated Development Environment, Anm. d. Interviewers], die ich zum entwickeln verwende. Insofern kenne ich mich damit aus. Jetzt nicht mit den Grund..., also nicht mit dem Customizing für TextGrid, aber Eclipse ist mir vertraut und ich schätze das sehr als IDE. Insofern finde ich das gut. Ja? So ein abschließendes Urteil kann ich nicht fällen, weil ich erst mit TextGrid arbeiten müsste. Auch einmal richtig in einem Projekt als umsetzend arbeiten müsste, um da ein finales Urteil zu fällen, ob es denn gut ist.

**I7-5#Prinzipiell**, das ist aber eher auch noch eine Grundphilosophie, oder so eine Frage eben. Wir hier im Hause sind uns nicht so ganz sicher, ob wir diese extrem tiefe Auszeichnung, die über dieses Teil auch möglich ist, auch wirklich so für unsere Online-Projekte brauchen. Da wir eben

sehr stark immer volltextorientiert arbeiten und auf dem Gebiet das anbieten möchten, also am reinen Text interessiert sind. Und dass... **I: Weniger an einem Apparat dafür.** B: Weniger an einem Apparat.

I7-6#Also die Frage ist, ob nicht für uns, für die Projekte hier, TextGrid, oder die Möglichkeiten, die man damit hat, ein Overkill einfach dann wäre für die Redakteure. Denn das muss ich schon sagen so... Wir hatten vorhin schon ganz kurz die Technikaffinität angesprochen. Auf dem Sektor würde ich mir vieles an Verbesserung in TextGrid noch wünschen, weil ich genau weiß: So kann ich das den Redakteuren hier noch nicht geben. Denn das ist allein schon schwierig, den Redakteuren einen Umstieg von Word auf OpenOffice zu vermitteln. Ja? Und das ist ja nun wirklich direkt benachbart. **I: Ja. Das sind wir auch bei einem wichtigen Punkt, denn auch**

**viele potentielle Nutzer von TextGrid müssen eben auch das Neue lernen und werden auch nicht viel mehr Technikaffinität aufweisen, sondern als Geisteswissenschaftler ja andere Schwerpunkte haben. Wie beurteilen sie dann die Erlernbarkeit? Sie haben ja viel Erfahrung jetzt mit verschiedenen Anwendungen auf dem Gebiet.** B: Also ich... Prinzipiell,

da kann ich jetzt bisschen auch aus einer ganz anderen Projekterfahrungsrichtung sprechen, prinzipiell halte ich das durchaus für erlernbar, oder auch vermittelbar. Vor allen Dingen muss man sagen: Ich habe jetzt persönlich in einem anderen Projekt mit sehr vielen älteren Menschen jetzt zu tun gehabt, die Typo 3 lernen mussten, was ja auch von der Oberfläche her nicht unbedingt unkomplex ist, oder für jemanden, der jetzt gerade im Web wenig zu tun hat, also wirklich keine Grundlage eben stellen kann. Und wir haben das damals mit Hilfe von Onlinetutorien und mit Hilfe von Videotutorials usw., also nicht nur schriftbasiert, sondern eben auch multimedial basiert, das vermitteln können. Und das hat gut funktioniert. Deshalb würde ich sagen, wenn man so einen Ansatz für die TextGrid-Vermittlung wählt, dass sich Leute in der Lage sind mit Filmtutorien eben auch selbst zu verarzten, oder indem man solche Workshops dann einfach auch macht, ja, denke ich, ist das machbar. **I: Also dass man mehr Unterstützung im Sinne von Hilfefunktionen...** B: Ja. **I: und Dokumentations...** B: Wobei ich vorsichtig wäre.

Ich bin nie so ein Freund von... Aber gut, da kann man ja auch immer nur subjektiv sprechen. Ich bin nie so ein Freund von der kontextsensitiven Hilfe oder den ganzen Icons. Da ist so meine Erfahrung: Die Leute klicken nicht darauf. Ja? Wenn ich bereit bin, eine Software zu lernen, dann brauche ich immer, also dann nehme ich mir die halbe Stunde und mache ein Tutorium. Und da probiere ich das aus. Also ich habe das ganz oft jetzt so erlebt, dass das der Prozess ist. Also klar. Onlinehilfe oder kontextsensitive Hilfe muss drin sein, wenn einer mal schnell draufklickt. Aber

es ist nicht das Primärtool. Ja? Und das habe ich jetzt auch an mir beobachten können bei dem Workshop. Ich habe da relativ wenig auf die Hilfeschaftflächen geklickt, sondern habe eher auf die Erklärungen im Workshop dann reagiert. Und ich denke, so etwas könnte ein Ansatz sein, dass man vielleicht eine Learning-Plattform bereitstellt, auch im Internet, wo die Leute eben innerhalb von ein paar Lektionen sich das aneignen können. Und das könnte man so fokussieren zu bestimmten Themen, dass man sagt: Auszeichnung mit dem „What you see is what you mean“-Editor, oder: So funktioniert es, ein neues Projekt anzulegen, oder so. So kleinteilig und dann denke ich, kann das gut angenommen werden.

**I7-7#I: Ok. Gab es irgendwelche Funktionen die völlig neu für sie waren?** B: Sehen sie, jetzt muss ich nochmal schauen. Ja, neu in was für einem Sinne? **I: In dem Sinne, dass sie noch nicht damit gearbeitet haben.** B: Ja. Also. Was mit sehr gut gefallen hat, ist das Konzept, dass alles eben in diesem Grid zu halten. Also, das alles netzwerkbasierend zu machen, ja, und eben in einem Repositorium vorzuhalten. Das, finde ich, ist ein guter und neuer Ansatz. Das hat mir gut gefallen, war auch in dem Sinne neu für mich. Auf dem Gebiet.

**I7-8#Mal gucken, was mir noch einfällt. I: Also, sie haben jetzt gesagt, sie kennen Eclipse...** B: Ja. **I: Sie haben mit XML schon zu tun gehabt. Von daher ist ihnen ja vieles bekannt da. Aber was... Gab es irgendetwas was ihnen aufgefallen ist, was sie noch nicht gekannt haben? Was neu für sie ist?** B: Jetzt an Eclipse? **I: Nein. An dem Gesamten. An dem gesamten Konzept.** B: Wahrscheinlich bin ich zu wenig in der XML-Ecke, um jetzt zu beurteilen, ob es auf dem Gebiet tatsächlich Neuerungen gab. Ne? Ich bin ja ganz unbefleckt auf dem Sektor hingekommen. Ich bin zu wenig in der Editionsphilologie drin wahrscheinlich, um da zu sagen: Ja, das ist doch super und das haben wir immer gebraucht. Ja? Aber so prinzipiell, wenn ich so Technik beurteile. Mir hat die Komponente von TextGrid sehr gut gefallen, und das Customizing für Eclipse fand ich eigentlich sehr übersichtlich gelungen. Und. Wobei. Einen Punkt, den hatte ich auch im Fragebogen schon wieder noch einmal angemerkt: Ganz wichtig ist meiner Ansicht nach die Lokalisierung, also Deutsch, als Oberfläche. **I: Das habe ich gelesen. Ja.** B: Das kann ich keinem... Also das weiß ich hier. Das wird man keinem geben können, wenn das nicht Deutsch ist. Denn es ist ja eigentlich...Also im Moment ist es ja dieser Mischmasch, dass sie hier Deutsch eintragen zum Teil. **I: Ja, das ist sehr bemerkenswert.** B: Ja, genau. Das ist ja nicht schlimm. Aber das würde ich definitiv vor dem Release noch einbauen. Wenn das geht.

**I7-9#I: Stichwort Customizing. Also Individualisierbarkeit. Das ist ja auch ein zentrales**

**Konzept...** B: Ja. **I: ... darin. Inwiefern spielt für sie das eine Rolle?** B: Gut. Es spielt für mich... **I: Aber das ist jetzt für sie wahrscheinlich auch die Schwierigkeit, dass sie weniger in dem Editionsphilologischen...** B: Na gut. Ich kann es vielleicht vor dem Eclipse-Hintergrund jetzt sagen. **I: Ja. Genau.** B: Also das erste, was ich gemacht habe, ist die Outline von rechts nach links. Hier. Weil da ist die bei mir in Eclipse. Insofern. Also was ich damit sagen will: Es ist natürlich sehr schön, wenn man die Oberfläche so anpassen kann, dass man gut damit arbeiten kann. Ja? Also, dass das modularisiert ist und ... Wobei ich auch da davon ausgehe, relativ wenige Nutzer, es sei denn man führt sie heran, werden das zu schätzen wissen, oder werden es benutzen. Es gibt sicherlich Leute, die setzen das ein. Aber die sind dann auch meistens schon relativ technikaffin. So ganz unbeleckte Redakteure, die haben wahrscheinlich Angst, wenn sie jetzt zum Beispiel hier die Outline wegziehen, dass sie die verlieren und dann finden sie die nicht mehr. Und dann ist Frustration angesagt. Ja? Keine Ahnung. Das muss man mal in der Praxis erproben. Ja? Aber prinzipiell ist das natürlich sehr geschickt, dass man etwas auf Basis von Eclipse so sich zurechtbasteln kann, dass man eine schöne Arbeitsumgebung hat. Das finde ich gut. Ja. Wobei ich dazu sagen muss, das ist ja eigentlich eine native Eclipsefunktionalität zu einem großen Teil. **I: Ja, das ist jetzt keine TextGrid-Spezialität.** B: Ja. Genau. Ja.

**I7-10#I: Es soll ja auch darauf ausgelegt sein, auch Schnittstellen zu bieten. Also, das heißt andere Tools anschließen zu können.** B: Ja. **I: Das war eigentlich das Grundkonzept. Arbeiten sie so? Oder welche Bedeutung hat das für sie? Also Tools an eine Plattform anschließen zu können evtl. einen eigenen Workflow zu generieren, sich zusammenzubauen praktisch?** B: Die Frage wäre jetzt: Was für Tools meinen sie? Jetzt... **I: Das kommt auf den Nutzer an.** B: Ja. Ja, jetzt habe ich es. **I: Gut, das ist vielleicht auch ...** B: Das ist sicher... **I: Viele haben jetzt natürlich aus der editionsphilologischen Sicht beantwortet.** B: Ja. Genau. Wenn sie... Ich habe jetzt auch gerade gedacht, sie denken dahin so zum Lemmatisierer und so etwas. So in diese Richtung? **I: Ja, ja. Aber damit arbeiten sie nicht.** B: Nein, damit arbeite ich als Entwickler gar nicht. Aber natürlich wäre das schon für mich relevant, so ein Modul zu haben, wenn in einem Projekt so etwas gebraucht wird. Das ist ganz klar. Ja? Also so würde ich die Software von meiner Warte auch einschätzen, dass das .... Das ist natürlich, sind einfach Komponenten. Wenn die vorhanden sind und andockt werden können an die Plattform, und ich kann sagen: Gut. Wir setzen im Rahmen von einer Projektumsetzung auf TextGrid, weil ich weiß, wenn wir einmal Lemmatisieren müssen, dann kann ich das den Redakteuren andocken und weil ich weiß: Gut. Wenn da die Wörterbuchsuche drin ist, dann ist das für die Redakteure

irgendwann auch einmal hilfreich. Dann für mich vielleicht eher aus der Adminperspektive: Prima. Ja? Dann ist es gut. Ja. Ne? Weil es gibt ja nichts Schlimmeres, wenn man irgendein Tool einsetzt und man sagt: So. Und für den Lemmatisierer müssen wir jetzt eine andere Software einsetzen. Ja? Ich bin dann immer eher für etwas Integratives, dass man alles in einer Plattform drin hat. Das ist schon ok. Ja.

**I7-11#I: OK. Was sehen sie als größtes Problem noch an TextGrid-Lab, so wie sie es jetzt getestet haben?** B: Ich sehe so ungern Probleme, sondern eher die Herausforderung. Ja. Genau, die man meiner Ansicht nach noch meistern müsste, um so richtig an den Start zu gehen. Ich finde die, also für mich ganz wichtig als Admin, oder als derjenige, der so etwas einsetzen würde bei Redakteuren: Lokalisierung ist für mich ein ganz wichtiges Ding. Dann, wie gesagt, das Beheben einiger Bugs, die grundlegend sind. Sprich: Das Speichern etc. Ne? Das Loginverfahren und so etwas. Also so die Essentials, die man braucht, damit man sagen kann, die Software funktioniert. Ob da jetzt irgendwann einmal, keine Ahnung was, im XML-Editor jetzt nicht 100%, oder wenn man da einmal ein bisschen frickeln muss, ja, kann man das einem Redakteur eher vermitteln, als dass man ihm sagt: Na ja, also allein schon für das Abspeichern müssen sie jetzt den Tab aufmachen und hierauf klicken und erst dann ist es abgespeichert. Also das muss einfach funktionieren. Ja? So die grundlegenden Dinge. **I: Also eine Sache der Navigation...** B: Ja.

**I7-12#I: Was sehen sie da als größtes Problem in der, von der Navigation her? Wo würden sie sagen bleibt man da hängen, oder ist etwas nicht transparent?** B: Ich muss einmal ein bisschen reinklicken gerade. **I: Ja klar. Kein Problem.** B: Naja. Also ich finde eigentlich, dass... Es ist ein bisschen schwierig für mich zu beurteilen, weil ich Eclipse schon kenne. Also ich finde es ist schon übersichtlich. Auf jeden Fall. Ja? So etwas denke ich... Vielleicht wäre es da... Also das muss man an Redakteuren testen. Was die als Problem empfinden. **I: Ich hatte im Fragebogen gesehen, da hatten sie gerade was Navigation anging, die Bewertung eher mittel bis eher schlecht bewertet und das finde ich eben gerade besonders interessant, weil sie ja als Entwickler da ja ständig mehr dazu sagen können, als einer der nur auf der reinen Userseite.** B: Ich versuche mich da gerade ein bisschen zu dran erinnern, was ich da als Kritik so hatte. Naja. Irgendetwas hatte ich... Na mal gucken. **I: Ja. Also sie hatten angekreuzt: Die Gestaltung der Navigation im Lab finde ich: Ja, also hier schlecht. Ne? Wenn hier die Mitte ist. Und die Organisation der Funktionen des Lab ist transparent. Genau. Also das ist bei Ihnen so ein Aspekt...** B: Das „transparent“, das habe ich angekreuzt, weil ich denke, dass es

auf jeden Fall, also aus Redakteurssicht jetzt. Ja? Also wie... Was ich vorhin gesagt habe: Es einfach so auf Redakteure loszulassen ist zu techi. Ja? Wenn man... Deshalb auch nicht transparent. Wenn man das Ganze vermittelt im Sinne von einem in Lektionen gegliederten Lernprozess. Dann geht es. Ja? Aber dazu gehört sicherlich auch, dass man ein bisschen Vorwissen bei den Redakteuren aufbaut, was XML überhaupt ist. Ja? Und deshalb ist, also um in ein Projekt reinzukommen, um zu sagen, wir nehmen jetzt TextGrid und hier: „einfach mal aufmachen“. Es ist sicherlich kein Tool, mit dem man einfach spielt und es ist selbsterklärend. Das ist so das, was ich damit meinte. Ja? Also das kenne ich von mir. Ich finde heute noch Eclipsefunktionen, von denen wusste ich gar nicht. Ja? Und das liegt einfach in der Natur der Sache. Es gibt Applikationen, mit denen kann man einfach spielen und dann erklären die sich selbst. Ja? Apple ist da zum Beispiel ganz groß. Ja? Das ist selbsterklärend. Ja? Und. Aber TextGrid muss gelernt werden oder vermittelt werden. Man kann das wohl auch schwer anders machen, denke ich, weil einfach TextGrid ja eine Aufgabe hat, komplexe Strukturen und Prozesse abzubilden. Insofern ist das nicht unbedingt ein Kritikpunkt, sondern einfach eine Bemerkung, dass man damit rechnen muss einfach. Also man kann nicht erwarten, dass die Leute da voll sagen: Ja, ist supertransparent alles. Ja? Von diesem Punkt Navigation... Wahrscheinlich habe ich da sagen wollen, oder wusste das nicht woanders einzuschätzen. Wir hatten da glaube ich diese Problematik, dass man bestimmte Felder nur ausfüllen, oder ausfüllen musste, damit es überhaupt weitergeht, und es gab keine Fehlerrückmeldung, wenn man da irgendetwas nicht gemacht hat. Das hatte ich so dunkel in Erinnerung, dass es diesen Fehler gab. **I: Ja bei der Metadateneingabe?** B: Eingabe. Genau. Da war irgendetwas und sodass... Also dieser Prozess: was mache ich wo - das verstehe ich jetzt einmal unter Navigation... **I: Ja. Genau.** B: Wie gesagt, ich könnte jetzt auch keinen Hinweis geben, wie man es einfacher machen kann, weil in gewisser Art und Weise muss ja Metadaten eingebbar sein. **I: Ja. Das ist für mich auch schon interessant zu wissen: da und da hakt es und...** B: Fand ich halt ganz schwierig. Und nicht unbedingt offensichtlich. Ich gehe mal kurz ans Telefon. [Pause]

**I7-13#I: Ja. Gut. Was sie besonders positiv bewertet haben, war die Möglichkeit zur Zusammenarbeit über das Lab. Also diese kollaborative...** B: Ja. Netzwerkkomponente. Ne? **I: Genau. Was sehen sie da für ein Potential? Also sowohl aus ihrer Sicht als Entwickler als auch, da können sie sich ja ein bisschen reinversetzen, da sie auch für Redakteure etwas konzipieren?** B: Also wir haben das, ich habe es gerade hier auf das Akademieprogramm appliziert. Wir haben Arbeitsstellen, die sind natürlich nicht in X, sondern in ganz Deutschland

angesiedelt. Und hier ist es durchaus so, dass da... Also jemand arbeitet in K und F, und wir sind hier in X die Koordinierungsstelle. So. Und das ist ja so eine Geschichte, wenn man solche Auszeichnungsvorgänge dann hat. Dann ist eben einfach viel Kommunikation notwendig. Und wenn dann alle Leute mit lokalen Versionen arbeiten und dann haben sie genau dieses Ding, dass die Dateien hin und her geschickt werden und es versendet dann die aktuellste Version in irgendeiner Mailbox von jemandem. Ne? Und das ist ja immer so der Alptraum. Ja? Und da ist natürlich TextGrid viel cooler, weil man hier sagt: Hier, wir haben hier dieses Projekt und jeder ... Also es ist ja im Prinzip so ein bisschen wie ein Subversion-Repository. Also jemand arbeitet daran, checkt die Änderungen ein und der andere checkt sie aus und arbeitet weiter daran. Und das ist immer gut. Ja? Also ich denke, dass es auch einfach zeitgemäß ist, das 2009 so zu machen. Ja? Und da würde ich sagen... Also was diese Komponenten angeht, würde TextGrid für mich durchaus auch schon in den engeren Kreis von Software kommen, wenn es Projekte hier gibt, oder das in Projekten hier einzusetzen, wo mehrere Leute XML auszeichnen, die in verschiedenen Arbeitsstellen in Deutschland sitzen. Dafür ist es super. Ja? Außerdem haben sie dann nie das Problem, ja, mit Backup und Datensicherheit. I: Ja.

I7-14#B: Wobei ich natürlich da mich darauf verlasse, dass die TextGrid-Leute das alles so perfekt sichern, dass das auch nie wieder verloren geht. Ja? Klar. Was ich mir vorstellen könnte, auch wenn ich es sehr positiv bewertet habe. Ich könnte mir vorstellen, dass es am Anfang Vorbehalte gibt in gewissen Bereichen von Leuten, die sagen: Oh. Ist das... Wir wollen ja nicht, dass da jemand anderes noch reinguckt. Ja? Das heißt also... **I: Das ist das Problem.** B: ... also, dass man das den Leuten verkauft, dass da eine gewisse Datensicherheit für die existiert, auch wenn sie online arbeiten. Ja? Und das habe ich jetzt in anderen Projekten auch schon erlebt, dass, selbst wenn das unbegründet ist, ist es immer ein Faktor, den man dann abschwächen muss. Argumentativ, ja, oder wenn man demonstriert: Kann kein anderer sehen etc. Also in dem Moment, wo Leute nicht bei sich was auf der Platte haben, sagen die immer: Kann das noch jemand anderes sehen? Ne? Gut. Aber das ist tatsächlich eine Sache, das ist eben die Aufgabe desjenigen, der TextGrid einsetzt, dass bei den Leuten die Sorge zu nehmen – meiner Ansicht nach. Würde mich, habe ich am Workshop nicht die Zeit gehabt zu fragen, würde mich auch interessieren, diese Komponente. Also wie dieses TextGrid-Repository funktioniert, also der Knoten, wie das wo vorgehalten wird und wie da die Sicherungssachen sind und so. Das wäre sicher auch ganz interessant für mich das auch mal zu erfahren. Wie das läuft. **I: Ok. Das ja, das ist natürlich noch ein großes Problem auch in den Geisteswissenschaften. Da ist eben die**



Einstellung noch ziemlich verbreitet, dass man seine Erkenntnisse nicht unbedingt teilen will. B: Ja, ja. Genau das. **I: Oder sagt: Das ist meine Forschung und so. Ja.**

**I7-15#Diese Vernetzung von Arbeitsprozessen und die ja auch mit einer Vernetzung von Inhalten einhergeht. Da besteht ja irgendwo die Gefahr, dass man sich eventuell auch verheddert, bei so einer Vernetzung. Was würden sie gerade als Entwickler da als gute Lösung ansehen?** B: Was meinen sie verheddert? **I: Ja. Also Vernetzung. Ja?** B: Ja. **I: Sowohl von Arbeitsprozessen als auch von Inhalten. Also man ist ja in einem Netzwerk drin.** B: Ja. **I: Ja, der Begriff „Lost in Hyperspace“ ist ja bekannt. Also wo könnte da die Gefahr liegen, dass man sich darin nicht zurechtfindet? Oder wie könnte man der begegnen – besser gesagt?** B: Ist das nicht eher eine Sache des jeweiligen Editionsprojektes? Also ich finde die Gefahr viel größer, dass sich jemand in der zehnstufigen Auszeichnung verliert, als dass jetzt da softwareseitig irgendetwas schief geht. Ja. Also das ist auch so ein Faktor. Das ist klar, wenn da so ein waschechter Philologe oder eine waschechte Philologin, die wollen dann wirklich den Punkt und das Komma auszeichnen. Und hier aus Entwicklerperspektive muss ich sagen: Naja, irgendwo ist dann die Sinnfreiheit gegeben. Ja? Das würde ich viel eher als Gefahr ansehen, dass sich die Leute praktisch in ihrer Auszeichnung verheddern, die oft gar nicht so notwendig ist. Ja? Kann man jetzt immer argumentieren: Ja, unsere Philologie und überhaupt. Ja klar. Aber wenn ich das jetzt von der Perspektive sehe: So etwas soll auch online verfügbar gemacht werden – gibt es Grenzen. Ja?

**I7-16#Bin ich jetzt ein bisschen überrascht, jetzt softwareseitig da zu sehen, dass da irgendwo...?** Naja gut. Es gibt immer die Gefahr, wenn das Netzwerk aus ist, kann man nicht arbeiten. Das ist halt ein Faktor, aber klar dafür, das muss ja dann TextGrid oder die Knotenbetreiber gewährleisten, dass das halt nie passiert. Ja? Das wäre halt schon schlimm, wenn irgendwie Projektergebnisse verloren gingen, oder alleine schon der Workflow aufgehalten wird aufgrund von Netzwerkschwierigkeiten. Das ist ja wirklich halt auch schon wieder so eines von den Essentials. Genau wie das Abspeichern. Das muss dann klappen, wenn ich mich auf ein Repository verlasse, muss es da sein. **I: Ja. Dann verstehen sie also darunter die Projektverwaltung und diese ganze Infrastruktur?** B: Ja. **I: Das was sie jetzt sagen, mit Repository und den... Also mit dem, was systemseitig zur Verfügung gestellt wird.** B: Ja. Das ist doch gut. **I: Ja.** B: Ja, weil man damit ja... Gut. Die Frage ist halt auch da wieder: Ich glaube zum Beispiel nicht, dass jetzt jemand, also dass die Philologen in den Projekten hingehen und diese Struktur aufbauen. Sondern die werden, glaube ich, immer einen technischen

Ansprechpartner dafür kriegen – nicht kriegen, sondern brauchen. Ja? Denn das ist klar. So habe ich das hier erlebt. So habe ich es auch früher schon erlebt. Klar. Ein Geisteswissenschaftler denkt nicht unbedingt in Admin- und Entwickler- und sonst was Rollen. Oder in diesem Rollenschema. Ja? Gut, es gibt Leute, die finden sich da gerne herein. Ja? Aber ich glaube, die Kombination ist doch wirklich eher so: Es gibt ein Projekt an einer Universität oder an der Akademie oder sonst wo, ein Editionsprojekt. Und da gibt es immer jemanden, der, oder sollte es jemanden geben, der sich technisch um administrative Dinge kümmert. Und der wäre auch meiner Ansicht nach immer der Verwalter für das TextGrid-Rollen-Management. **I: Also sind sie da schon der Meinung, dass man die Infrastruktur von Systemseite vorgeben sollte. Eine einheitliche...** B: So wie wir es gesehen haben, fand ich das in Ordnung. Dass man sagt: Es gibt den Projektadministrator. Es gibt dann den Projektmitarbeiter und so. Ich weiß jetzt gar nicht? Gab es noch eine dritte Stufe? **I: Ja. Es gab noch Beobachter.** B: Ja. Aber das ist doch klassisch, eigentlich. Ja? So haben sie das ja in verschiedensten Applikationen und auch Onlineredaktionssystemen auch. Ne, aber das funktioniert ja sehr gut. Ne? **I: Das ist ja eine Frage. Was soll communityseitig beeinflusst werden können, also an Rollenvergabe? Und was von der Systemseite her praktisch? Das ist ...** B: Na, da bin ich immer dafür, dass die Systemseite alles bietet, dass die Community etwas daraus machen kann, was sie braucht. Ne? Ah ja, klar. Das ist so das Ding. Weil mich eine Software auf etwas einschränkt und dann ... Also das Schlimmste an Software ist doch immer, wenn ich sie einsetze und danach, nachdem schon ein Stück Weg zurückgelegt ist, feststelle: Oh? Hier ist eine Wand. Ja? Und dann auch nicht in der Lage bin, das großartig zu ändern. Es sei denn, ich würde mir mal schnell übers Wochenende einen TextGrid-Entwickler holen können. Ja? Das fände ich schlimm. Aber wenn man jetzt zum Beispiel von einer echten Verwaltung spricht, die Rollen zur Verfügung stellt, die dann jeweils von den Projektadministratoren oder auch von der Community vergeben werden, ist das doch gut. Ja? Man kann ja auch an so etwas denken, oder man sollte vielleicht auch an so etwas denken, dass die Community, also dass man das so offen anlegt, dass es möglich ist, später durch die Community noch Rollen zu definieren. Denn das denke ich, passiert immer, wenn man communitybasiert arbeitet. Man kann das nie alles komplett durchplanen, was man brauchen könnte. Also muss man die Schnittstelle so offen gestalten, dass die Community auch in einem halben Jahr sagen kann: Ja, aber es gibt doch auch noch diesen Zwischenstand zwischen dem Administrator und dem Projektmitarbeiter. Der müsste das und das können. Ja? Und dann muss das einfach möglich sein so etwas einzubasteln. Man sagt immer so schön: "Muss so..." und die

Leute kriegen dann die...

**I7-17#I: Dabei spielt ja auch noch eine Rolle, dass unheimlich viele Inhalte drin sind – in einem Gridknoten. Und auch die Vernetzung von verschiedenen Projekten bringt ja auch eine Vernetzung unterschiedlichster Inhalte mit sich, die ja auch durch die Community verknüpft werden kann. Also von Nutzerseite aus generiert werden kann als Netzwerk. Noch mal zu der Gefahr des Sich-Verhedderns, da hört es ja irgendwo auf, dass alles systemseitig vorgegeben ist.** B: Ja, denken sie... Ist das so unklar, dass zum Beispiel ein Editionsprojekt irgendwo stattfindet, und Nutzer können sich einklinken und dann einfach da mitarbeiten? **I: Ja, das kommt darauf an, wie das Projekt angelegt wird.** B: ... aussieht dann einfach... **I: Genau. Also es muss zumindest die Möglichkeit bestehen, dass man verschiedene Projekt miteinander verknüpfen kann. Das ist ja Sinn der Sache. Auch der Kooperation. Und. Ja, da würde mich interessieren: Was halten sie da für eine vernünftige Umgehensweise damit, dass eben... Also den Umgang mit großen Datenmengen und deren Ordnung?** B: Da kann ich auch ein kleines bisschen jetzt so auf konkreten Anwendungsfeldern, die für mich jetzt relevant wären, sprechen. Wir haben zum Beispiel in diesem Inschriften-Online-Projekt, haben wir verschiedene Arbeitsstellen in G, in B, in X etc. Die arbeiten in der Erstellung ihrer Inschriftenbände 90% bis 95%ig konform, und dann gibt es die 5% Abweichung. Ja? So. Wie gesagt, dass ist natürlich für die in Ordnung, weil die ja Printpublikationen herstellen. Für jemanden, der jetzt eine Onlinepublikation daraus macht, die ja einfach eine Datenbank braucht, eine möglichst gleichartige Auszeichnung der verschiedenen Inhalte etc., ist das natürlich schon wieder schlimm – diese 5%. Wenn man mit Hilfe von TextGrid zum Beispiel in der Lage wäre, Redakteure jetzt in G, in B und in X so zusammenzulegen, dass die in eine Schablone arbeiten und praktisch eine Sache auszeichnen, die dann im Endeffekt auch hervorragend exportierbar und weiterverwendbar ist als XML-Format für andere Medienanwendungen, dann wäre das für mich eine sehr große Hilfe. Insofern ist das auch wieder als Netzwerkkomponente sehr gut. Ja? Weil ich dann auch... Da gibt es nicht die Schwierigkeit, dass zum Beispiel B arbeitet mit InDesign-Dateien direkt. Ja? Und G macht aber noch Word etc., wenn man dann sagen kann, es gibt diese eine Software, die überall gleichartig eingesetzt wird. Es gibt die gleiche Schablone in Form der XML-Vorlage, die da für die Auszeichnung entwickelt wird und dann von allen eingesetzt wird. Das ist sehr sinnvoll meiner Ansicht nach. Ja, weil es einfach dann den Overhead reduziert, den man als Entwickler dann am Ende hat, wenn man diese Abweichung, diese 5% wieder über einen Kamm scheren muss für eine Online-Ausgabe. Ja?

Also da bin ich für.

I7-18#Und verheddern? Ich weiß nicht. Nein, ich sehe die Gefahr nicht so. Ja? Dass man sich da so verliert. Weil ich doch eigentlich eher davon ausgehe, dass die Projekte relativ fokussiert an ihren Sachen arbeiten. Ich bin mir nie so sicher, ob, hört sich auch wieder ein bisschen negativ an, die Community dann so entsteht, wie man es denkt. Ja? Denn ist ja... Sieht man bei jedem Web 2.0 Startup-Unternehmen jede Woche. Da wird dann immer geglaubt, es kommt die große Community und dann ist es aber, wird es entweder ganz anders oder gar nicht angenommen. Ja? Und ich denke man sollte nicht zu sehr auf Sachen bauen, also kollaborativen Projekten, die auf jeden Fall so eintreten. Sondern man muss, was sie ja auch schon gemacht haben, das früh releasen, dass die Community schon früh anfängt, sich damit zu beschäftigen und dann schauen, wie es angenommen wird. Also was entsteht denn daraus gerade. Ja? Was so ein bisschen auch so getrennt sein sollte, oder muss ja von der Grundfunktionalität, die TextGrid als Editor jetzt bereitstellt, sicherlich.

**I7-19#I: Wie ist denn das bei ihrer Arbeit, wenn sie als Admin ein Netzwerk sowohl bauen als auch betreuen, betreiben. Welche Bedeutung messen sie der Komponente zu, das sichtbar zu machen, das transparent zu machen, dieses Netzwerk für den Nutzer? Also dass er weiß, wo er sich da befindet und dass er das überblicken kann. Dass er also nicht einfach an seiner Position ist und dann auch weiß, was um ihn herum...** B: ... passiert. Ne? Ja. Ist eine sehr gute Frage. Hier würde ich wieder sagen: Es gibt ja im Prinzip zwei Ansätze. Bei TextGrid ist ja das so, man hat sein Projekt in diesem Knoten und es ist ja sehr flach gehalten, von dem was ich sehe. Eigentlich. Ja? Also ich check mein Projekt ein und dann ist es da drin. So. Und mehr sehe ich davon nicht. Und das ist sicherlich meiner Ansicht nach für einen sehr hohen Prozentsatz von Redakteuren prima. Ja? Für die ist ja nur relevant zu wissen: Mein Projekt und es ist im Netzwerk. Ja? Wo das ist, ist dann eher für die Leute, die wirklich Techies sind. Ja? Und jetzt so hier von der Anwendung her – ich werde selten danach gefragt, wo was genau wie zusammenhängt und wie es ist. Ich werde eher gefragt, warum etwas nicht funktioniert. **I: Ja. Ok.** B: Das ist genau diese... Aber das ist klar. Der Admin, der ist immer, der muss den Kopf hinhalten, wenn es nicht funktioniert. Aber solange es funktioniert, interessiert es keinen. Ja? Hauptsache es funktioniert. Ja? So würde ich das für bei TextGrid sehen eigentlich. Ja? Ich weiß jetzt gar nicht: Kann man innerhalb von TextGrid-Projekten noch Unterprojekte anlegen? **I: Ja.** B: Oder geht das irgendwann so auf der einen Ebene? **I: Nein, das ist theoretisch möglich. Also klar.** B: Wie war das noch. Wir haben doch hier gerade... Das sind wir doch. Genau. Könnte ich

jetzt hier innerhalb dieser Folder noch einen Subfolder etc., also irgendeinem anderen Unterprojekt anlegen? **I: Zu dem ...** B: Also hier drin. Ne? **I: Ja also von der Struktur her ist das prinzipiell so gedacht. Wie das derzeit praktikabel ist, weiß ich ehrlich gesagt nicht. Und da kommt es jetzt... Konkret kommt es natürlich auf die Zugriffsrechte an. Ne?** B: Ja. **I: Aber das soll zumindest möglich sein, wenn es soweit ist.** B: Ja. Nö. Also was die Nutzer hier vom Grid an sich mitkriegen, sind ja ihre Ordner. Die sie da drin haben. Ja? Und dadurch, dass das ja durch Eclipse auch so angelegt ist, dass das ein bisschen wie bei Windows Explorer ist, dann sehe ich da überhaupt keine Nutzerschwierigkeiten. Das versteht wirklich jeder. Also überall wo man mit hierarchisierten Baumstrukturen oder Ordnerstrukturen arbeitet, ist das sehr eingänglich für die Nutzer, weil die meisten arbeiten schon tagtäglich am Rechner. Und das ist in Ordnung.

**I7-20#I: Da wäre zu überlegen, inwiefern man der Community das zur Verfügung stellen sollte, dass der Nutzer über sein Projekt hinaussehen kann, um eben Potentiale auszuschöpfen, die diese Vernetzung ja gerade mit sich bringt.** B: Das jetzt zum Beispiel... **I: Solange er hier in seinem Projekt ist und alles funktioniert und er keine Fragen stellt – klar! Aber wenn man beispielsweise genau das zur Verfügung stellen will, dass er auch die Potentiale ausschöpfen kann, die durch die Vernetzung gegeben sind, also Kontakt aufnehmen kann, zu ähnlichen Projekten beispielsweise.** B: Ja, das ist doch... Ja. **I: Ich sage ja: Da stellt sich dann wieder die Frage, inwiefern ist es wichtig zu zeigen wie das Netzwerk aussieht. Und wie die Verknüpfungen sind? Was noch da ist?** B: Die Frage ist doch da schon wieder. Gibt es eigentlich zu TextGrid, also zu dem Projekt TextGrid, noch eine Online-Plattform? **I: Es gibt natürlich eine TextGrid-Homepage, aber die ist ja jetzt nicht Teil dieses Labs. Aber TextGrid ist ja angeschlossen an eine übergreifende Struktur D-Grid hin zu anderen Wissenschaften. Die Ingenieurwissenschaften heißen zum Beispiel InGrid.** B: Sehr schön. **I: Insofern ist das also ein umfassendes Netzwerk – auch interdisziplinär. Und das ist auch zentrales Konzept. Dass man also verknüpft mit anderen Wissenschaften, Interdisziplinarität fördert – und so.** B: Also ich sage mal so: Ich glaube, der Kontakt zwischen Projekten entsteht eher persönlich als hier dadurch, dass ich mich in meinem Lab einlogge und das sehe. Ja? Das ist einfach so. Der kennt den und dann wird mal darüber gesprochen: Ach, ihr macht das auch. So. Aber was dann passiert, ist vielleicht ganz interessant für ihre Frage. Dann passiert es sicherlich, dass Leute sagen: Ach, ihr arbeitet auch mit TextGrid. Ja, super. Können wir mal bei euch in den Ordner reinlinsen. Ja? Denn das... Da das natürlich geht, ist das eine sehr

schöne Sache. Ja? Also ob jetzt so wirklich viele Nutzer innerhalb des gesamten Knotens browsen wollen, weiß ich nicht. Weiß ich nicht. Vielleicht hat man da schon Interesse daran. Ja? Ich glaube viel entsteht über persönliche Kontakte. Und wenn man dann Leute dazuschalten kann, zu eigenen Projekten, oder da dann die Kommunikation entsteht: Wir machen die Auszeichnung so. Ah, guckt mal bei uns rein. Wir machen sie so. Das ist super. Ja? Im Sinne zum Beispiel von Beobachterrollen, die dann vergeben werden, von dem einen an das andere Projekt. Ja? Sehr interessant. Ja? Ansonsten weiß ich nicht, ob man tatsächlich, wenn man hier... Sagen wir mal hier wäre noch so ein Weltkugelmäppchen obendrüber, der Gesamtknoten. Ja? Uninteressant ist es nicht. Ja? Das wäre aber sicher so ein Communityfeature, wo man mal gucken muss. Man kann das ja mal anbieten und gucken ob es angenommen wird. Oder umgekehrt: Man kann einen Text drin testen und nach einem halben Jahr fragt man mal die Leute: Hier. Wäre so etwas cool? Ja? Bevor man sich die Mühe macht, dann das zu implementieren. Ja? Ich, wie gesagt, ich habe ja jetzt auch nur zweieinhalb oder drei Stunden mit TextGrid arbeiten können... **I: Ja. Nee, klar.** B: Aber ja. Ich würde es sowohl als auch anordnen. Wahrscheinlich.

**I7-21#I: Ok. Sehen sie Möglichkeiten, mittels dieser digitalen Infrastruktur und den Mitteln, die die IT zur Verfügung stellt, auch neue wissenschaftliche Erkenntnisse zu gewinnen? Über solche Anwendungen?** B: Ja, klar. Ja, gut. Das ist so ein Grundanliegen von der digitalen Akademie hier, dass wir, ja, nicht nur medienwirksam arbeiten, sondern dass wir die in Projekten erzielten Forschungsergebnisse einer Allgemeinheit öffentlich machen. Ja? Das ist ja ganz wichtig, dass das verfügbar wird, das Zeug. Ja? Und damit verknüpft ist natürlich, dass sie über die elektronische Erschließung mit Hilfe von XML, oder weiteren Verfahren der Onlinebereitstellung, ganz neue Zugriffe auf die Datenbasis geben können. Dass sie dann zum Beispiel... Also auch wieder ein klassisches Beispiel aus dem Inschriftenbereich: „Zeige mir alle Glocken an einem Südturm zwischen 1400 und 1500“. Dann sind sie aber hier am blättern. Ja? In dem Buch, ne. Und das ist natürlich für die Forschung schon eine sehr relevante Frage, was da an Ergebnissen aus der Onlinedatenbank ausgespuckt wird. Ja? Und das kann man ja jetzt wirklich bis ins Detail machen. Also, dass man Texte so elektronisch erschließt, um neuen Zugriff auf die Daten zu geben. Das, denke ich, ist auf jeden Fall das, was kommt. Was jetzt auch kommt. Ja? Das ist die letzten ein, zwei, drei Jahre schon verstärkt zu beobachten, und das wird meiner Ansicht nach in den nächsten fünf Jahren noch einmal um das Doppelte bis Dreifache stärker werden. Ja? Kollaboration. Auf Basis von Software wie zum Beispiel TextGrid es ist. Ja? Und

Verfügbarmachung von Projektergebnissen. Das wird es bringen. Ja? Semantisierung. Auch ein ganz großes Thema. Gerade in den Geisteswissenschaften. **I: Semantic Web.** B: Ja. Jetzt so für mich. Ich bin ja auch Historiker so im Zweitfach. Klar. Semantisierung von Quellen durch Texterschließung, ermöglicht es mir, als Historiker, ganz neue Abfragen zu stellen an mein Quellenmaterial. Wenn ich zum Beispiel sagen kann: Naja. Wie hat denn... Also was war denn eigentlich die Sprache des Rates in den und den oberdeutschen Städten? Wie ist denn das, was wir immer so in den politikhistorischen Studien so gesagt bekommen, wie ist das denn sprachlich verhandelt worden? Ja? Und so. Wo gibt es die Unterschiede? Das sind sicher neue Perspektiven. Ja. **I: Also lässt sich da, wenn sie sagen: Verfügbarmachung oder "Zeige mir" das und das. "Zeige mir" bedeutet ja auch: sichtbar machen.** B: Ja. **I: Also im Sinne von Visualisierung von Zusammenhängen, die man jetzt auf herkömmliche...**

17-22#B: Oder jetzt noch ein weiteres Beispiel... **I:... Weise nicht gut hinkriegen wird wenn sie sagen: blättern bis zum Abwinken, um es herauszukriegen. Sie wollten gerade noch ein anderes Beispiel nennen.** B: Ja. Ein anderes Beispiel, was mir gerade so einfällt: Regesta Imperii. Ja? Also das ist die Regesten-Datenbank für Reichsgeschichte für die Historiker. Ist jetzt ja schon online seit Jahren und ist inzwischen ein Instrument, das aus der Forschungslandschaft nicht mehr wegzudenken ist. Ja? Also bevor ich jetzt groß an die Regesten-Bände latsche in der Universitätsbibliothek oder so. Da gucke ich erst einmal in ein Online-Regest rein. Und da habe ich noch nicht einmal irgendwie eine spezielle Abfrage gestellt. Da ging es nur darum, dass das verfügbar war hier. Ja? Aber allein schon zu sagen: Was für Regesten treffen denn zu auf Karl den Großen in dem und dem Zeitraum? Ja? Und allein das reduziert so erheblich den Aufwand. Den Rechercheaufwand, den ich als Historiker dann habe. Und da muss es hingehen. Oder geht es ja schon hin. **I: Da hat man praktisch in kürzester Zeit ein Muster selektiert, für das man ansonsten unheimlich viel Blätter recherchieren muss.** B: Oder auch wieder so etwas gesagt, jetzt auch wieder als Historiker: Wenn sie Early English Books Online nehmen, das ist eine englische Quellendatenbank, also mit Faksimiles von den frühesten Druckwerken in England. Normalerweise würde das einen erheblichen Aufwand bedeuten, wenn man sich als Historiker damit beschäftigt, in diese Archive zu gehen und das Material einzusehen. Hier kann ich das vierundzwanzig sieben von meinem Stuhl aus machen. Ja? Und dasselbe gilt in gleichem Maße meiner Ansicht nach für historisch-kritische und philologische Editionen. Ja? Nur also das Zeug muss verfügbar sein. Ja? Sonst... Ne? Also das ist so die Generation 2.0 von Forschern, denke ich. Ja? Aber sie haben gerade noch... Ich habe sie unterbrochen. **I: Nein, nein. Das war**

eigentlich, was ich wissen wollte. Ich vertiefe das nur, denn sie haben gerade so schöne Beispiele genannt und da habe ich dann immer wieder nach und ... Mir war vor allem der Punkt wichtig, wenn sie sagen: Zeige mir alle Glocken von da und da, oder zeige mir alle Stellen, die mit Karl dem Großen zusammenhängen, dass das ja eine Form ist, Muster zu selektieren und Zusammenhänge sichtbar zu machen. In großen Datenmengen, die ansonsten mit konventionellen Methoden nur mit Riesenaufwand vielleicht erreichbar wären. Ja das war für mich interessant zu wissen, inwiefern sie das für relevant halten. Dass das eben auch etwas ist, was mit TextGrid erreicht werden soll, oder was TextGrid bieten soll. Gerade mit dem Grid-Hintergrund. B: Ist eigentlich gedacht, dass ich diese Art von Recherche innerhalb des Grids ausführen kann, oder? I: Ja.

17-23#Da kommt wieder das Konzept zum Tragen, dass natürlich ein Gridknoten und TextGrid, damit steht und fällt, was die Community macht. Also das eben solche Daten eingestellt werden. Und entsprechend auch die Recherche. Wir können ja schlecht als TextGrid-Entwickler alle Daten jetzt sammeln und sagen: Wir stellen das alles zur Verfügung. Sondern ein Gridknoten funktioniert ja so, dass die Community da gefragt ist, das einzustellen. Insofern sind wir natürlich schon darauf angewiesen: Wer macht mit? Wer stellt was ein? B: Ja. Ja. I: Es ist im Grunde die Infrastruktur, die von den Entwicklern zur Verfügung gestellt wird, nicht die Inhalte. B: Ja. Ja. I: Daher. B: Ja, aber das ist doch positiv, weil ... Gut. Es wird immer die jeweilige zum Beispiel Webanwendung im Detail dann sein. Man kann sich durchaus so etwas vorstellen. Ein Editionsprojekt gibt Textdaten ein. Die können da auch eine zeitlang liegen. Und irgendwann kommt dann ein Antrag auf "Verfügbarmachung online" und in Form auf Recherchierbarkeit auch. Ja? So. Und wenn man dann halt natürlich auf XML-Grundlage zurückgreifen kann, die schon sauber ist. Wobei das zugegebenermaßen damit steht und fällt, wie der jeweilige Projektleiter das angelegt hat. Das ist klar. Aber wenn man da schon auf Mechanismen zurückgreifen kann, die es schon gibt. Wenn man auch sich so etwas vorstellt, dass... Wir nehmen jetzt mal den Fall X an, dass in der Zukunft die Community sehr aktiv ist, und es gibt schon Projekte, die haben sich schon Online-Suchmasken für textgridbasierte Materialien zurechtgeschneidert Ja? Wenn ich da jetzt als weiteres Communitymitglied hingehen kann und kann auf das zurückgreifen. Ja? Tatsächlich in dem Sinne von einem Open-Source-Gedanken. Und kann sagen: Gut jetzt. Jemand hat in PHP zum Beispiel schon einmal das und das geschrieben für ein TextGrid-Projekt. Für die Recherche und so. Dann ist das natürlich cool. Ja? Weil das dann natürlich auch, den Geisteswissenschaften



immer sehr knapp bemessenen finanziellen Rahmen, dann reduziert. Ja? Das ist fast undenkbar, dass man alles immer Agenturen nach außen gibt. Im eigenen Haus ist oft sehr wenig oder kein technisches Wissen auf dem Gebiet im Moment noch. Das muss man auch gucken, was die nächsten paar Jahre passiert, ob da Stellen geschaffen werden. Aber das ist es einfach. Und da muss man gucken, dass..., auf was für Lösungen man sich zurückziehen kann, die nicht so unglaublich viel kosten, wie das in der freien Wirtschaft eben der Fall ist. **I: Ja. Es ist eben oft so, dass in Projekten dann jeweils wieder völlig neu programmiert wird, was ein anderer ständig...** B: Ja. Schon gibt. **I: ... Und dann dauernd nämlich die Zeit und Geld investiert wird. Und das soll eben auch eine Möglichkeit sein, über ein Konzept wie TextGrid ...** B: Das zu normieren, ne? **I: Also klar. Standardisierung und ...**

**I7-24#Ja. Gut. Einen Punkt, einen abschließenden Punkt, haben wir jetzt eigentlich schon besprochen, nämlich der Begriff eHumanities, was sie damit verbinden und welche Potentiale sie da sehen? Aber das hat sich jetzt eigentlich in den ganzen bisher besprochenen Punkten, denke ich ...** B: Eigentlich widerspiegelt. Ne? **I: Ja. Vielleicht könnten sie zusammenfassend da noch einmal etwas dazu sagen. Was verbinden sie mit dem Begriff?** B: Also ich finde eHumanities ist mindestens genauso ein Begriff wie Web 2.0. Ne? **I: Ja. Ja.** B: Immer mit Vorsicht. Ja? Ich glaube die Zeit von eHumanities, dass man damit irgendwo bei Ministerien etc. punkten konnte, weil man es macht, ist damit vorbei, sondern man muss es auch konkret mal machen. Ja? Man muss es auch nicht eHumanities unbedingt nennen, sondern einfach zum Beispiel eine Begleitkomponente von irgendeinem geisteswissenschaftlichen Projekt etc. Ja? Aber nein, das hat sich tatsächlich jetzt, glaube ich, im Gespräch schon widerspiegelt. Ja? Also meine Überzeugung ist es, in dem Bereich oder im Bereich der Geisteswissenschaften, dass kein geisteswissenschaftliches Projekt in nah- bis mittelfristiger Zukunft ohne Online- oder Texterschließungskomponenten auskommen wird, auf elektronischem Weg. Und dass das im Prinzip eine ganz wichtige Sache ist für die Verfügbarmachung des Materials. Dass praktisch Leute in die Lage versetzt werden, und nicht unbedingt auch immer nur eine Forschungsgemeinde, sondern gerne auch die allgemeine Öffentlichkeit, in der ja oft auch Ressourcen und Potenziale schlummern, die man so noch gar nicht einschätzen konnte als Forscher. Da kann ich auch wieder aus Beispielen schöpfen. Ich bin ganz früher, oder jetzt auch lange Jahre schon, mit dem Projekt RegionalgeschichteNet beteiligt. Hier in X. Das ist ein [vom Bundesland betriebenes] Projekt an der Uni, das sich damals 2001 zur Aufgabe gemacht hat, in den Geschichtsvereinen vor Ort, die Lokalhistoriker, die jetzt sicherlich

keine Fachhistoriker von der Uni sind, aber die einzubinden. Und die Ressourcen, die vor Ort sind, eben zu wecken. Ja? Und das ist erstaunlich gewesen, wie das angekommen ist und ist erstaunlich gewesen, was da für Publikationen – in Anführungszeichen – aufgetaucht sind und Archiverschließungen etc., die so nie in irgendeiner Art und Weise an die Öffentlichkeit gekommen wären. Ja? Aber wo sich jemand hinsetzt, zum Beispiel ein Familienforscher, und der steckt da 25 Jahre seines Lebens rein, von 60 bis 85, und dann vergammelt das Zeug in seiner Schreibtischschublade. Ja? Und das... Da sehe ich eigentlich eine Aufgabe, wenn wir jetzt noch mal den eHumanities-Begriff nehmen, die eben genauso wichtig ist, wie das, dass man als Profi von der Uni Forschungen verfügbar macht. Es geht darum, dass das für eine Allgemeinheit verfügbar ist. Ja? Denn es ist nicht so, dass die zündende Idee immer von der Uni kommen muss. Das kann durchaus auch einmal aus dem Web kommen. Und gut. Ich bin da vielleicht auch zu enthusiastisch was das angeht, aber... **I: Ja, gar nicht. Es ist sehr interessant, dass sie eine Erweiterung des Communitygedankens über diese abgeschlossene wissenschaftliche Community...** B: Genau. **I: ...hinaus.** B: Und. Also dass das funktioniert, haben wir jetzt bei Regionalgeschichte.net gesehen. Das sind weit über 100 Leute und zwar im Semester zwischen 65 und 75 beteiligt, die alle hier noch schön PC machen und so, sich das angeeignet haben. Ja? Deshalb habe ich vorhin auch mit dem Hintergedanken gesagt, dass ich TextGrid durchaus für vermittelbar halte. Ja? Weil diese Leute, die haben das auch gelernt, damit, das Redaktionssystem. Und das geht schon. Ja? Da geht doch eigentlich die Geisteswissenschaft hin. Ja? Oder? Man muss sich doch immer fragen, wofür macht man denn diese Editionen? Klar. Man macht sie für die Forschungsgemeinde. Man macht sie eben aber also, um... Man macht sie ja auch für die Öffentlichkeit. Das ist ja auch ein öffentlicher Auftrag. **I: Klar. Es ist ja auch öffentlich gefördert.** B: Ja genau. **I: Klar.**

I7-25#B: Wichtig finde ich, dass neben der Verfügbarmachung interaktive Komponenten schon mit rein kommen. Sprich: Zum Beispiel eine Kommentierungsfunktion. Ja? Selbstverständlich ist es so, dass gewisse..., eine Publikation muss in ihrem Sinne so bleiben wie sie ist. Denn das ist ja die Wissenschaftlichkeit daran. Was aber trotzdem nicht heißt, dass ich die Möglichkeiten von Web 2.0, dass zum Beispiel Abschnitte kommentiert sind oder dass da Nutzerfeedback gegeben werden kann, direkt, dass Adenda und Korrigenda gegeben werden können. Das ist sicher ein Feature des neuen Mediums Internet zum Beispiel, was ich ganz stark als eHumanities bezeichnen würde. Ja? **I: Also auch Kommunikation und Social Software Anwendungen.** B: Genau. Genau. Zum Beispiel beim Inschriftenprojekt haben wir das ganz genau so gehabt. Da

gibt es ein Feld Adenda & Korrigenda und da kann hier der Dr. M, der jetzt für den ersten Bestand verantwortlich ist, der hat von Leuten gesagt gekriegt: Hier gibt es einen Transkriptionsfehler. Ja? Oder hier ist ein Datum falsch aufgelöst. Was passiert! Ja? Das mindert ja nicht die Wissenschaftlichkeit oder die Qualität des Werks, sondern das sind Sachen, die passieren. Ja? So. In der Druckversion haben sie den Fehler. Ja? Wenn sie jetzt die Digitalisierung Online abrufen, dann ist da eine Anmerkung dabei: ... **I: Vorsicht...** B: ... An dem und dem Datum, das und das Agendum vorgenommen. Ja? Falsch übersetzt. Das und das sollte so sein. Und in dem Moment ist es viel aktueller. Ja? Und damit auch, weil es ja also..., für die wissenschaftliche Arbeit, viel bedeutender einfach. **I: Gut. Ja. Das wäre es zunächst einmal.** B: Schön.
