# Supplementary material
Source: publisher site journal article supplement (https://www.degruyterbrill.com/publication/isbn/9783110463927/downloadAsset/9783110463927_Interviews.zip)
Supplement: Supplementary file 27 [file I8.pdf › Interviews/I8.pdf]

**I8-1#Interviewer: Zunächst würde ich gerne wissen, was genau ihre Tätigkeit ist, jetzt speziell auf EDV-Philologie bezogen und was ihre Erfahrung da ist – wie sie ihre Erfahrung darin beschreiben würden, ihre Tätigkeiten.** Befragte/r: Also was ich mache, seit sechs Jahren im Hause, ist, dass ich eine - wir haben einen starken epigraphischen Schwerpunkt, also hebräische, jüdische Grabinschriften. Und da haben wir in den letzten Jahren 15000 Inschriften online gebracht, digital ediert. Also wir sind übergegangen von Bucheditionen auf Digitaledition. Und in dem Zusammenhang habe ich mich auch sehr stark auch mit TEI befasst. Weil, da gibt es ein epigraphisches Projekt, da waren wir auf einem Workshop in London. Und wir haben immer ein bisschen Text-Encoding auf der Agenda. Wir machen das zurzeit., geben XHTML aus und machen das alles über TUSTEP. Also wir halten eine TUSTEP-Datenbank und machen das alles mit TUSCRIPT. Also mit dieser Scriptsprache von TUSTEP, die ja sehr serverfähig ist. Das ist so mein editionsphilologischer Hintergrund.

I8-2#Also wir bieten eben einen Open Access zurzeit an, dass man sich eine TEI-Datei herunterladen kann oder einfach Plain-Text. Unsere eigene Präsentation ist eben unsere eigene Präsentation, die dann ganz verschiedene Zugänge gibt. Aber wir wollen eben auch, dass andere damit arbeiten können. Und das ist das, was mich an TextGrid auch interessiert hat. Also dass man anderen auch wirklich zu den Daten selber Zugang geben kann. Dass die da nicht mit Copy & Paste da irgendwie rausbasteln müssen, sondern dass sie direkt daran arbeiten können. Das finde ich sehr interessant daran. **I: Den anderen im Sinne von Projektpartnern, oder?** B: Der großen weiten Welt. **I: Der großen weiten Welt.** B: Wir sind ja eine Hilfswissenschaft. Also epigraphische Daten, so Grabinschriften, Inschriften, das ist ja... So einen Korpus liest ja niemand von... Da liest ja niemand 7000 Grabinschriften. Man hat immer spezielle Fragestellungen. Und im Rahmen dieser Fragestellungen ist es schön, wenn man da auch dann Inschriften findet. Die sucht man ja nie. Also man weiß ja nicht, dass auf einer Inschrift, wenn ich mich jetzt mit Barockpoesie, hebräischer, befasse, weiß ich ja gar nicht, dass in Hamburg, unserem großen Bestand, da ganz viel zu finden ist. Also ich muss irgendwie mein Material an Orte legen, wo es Leute finden können. Da ist Internet schon ganz gut. Und auch so, wie wir es kodiert haben.

I8-3#Also man... Wir merken, dass wir viel mehr wahrgenommen werden als früher, weil man bestimmte Dinge einfach nicht auf Grabinschriften suchen würde. Wir wissen, dass die darauf sind, aber das weiß ja der durchschnittliche Judaist nicht. Und von daher sind wir da schon eine ganze Weile offen für. **I: Ja. Es ist also ein Ziel für sie, in ihrer, naja sagen wir Zielgruppe**

**oder der Nutzerschaft, die darauf zugreifen will, sichtbar zu werden und...** B: Ja. **I: ... es nach außen zu tragen.** B: Vielleicht eine weitere... Ja, wie nennt man das? Ein weiterer Ort, wo wir das komplett ablagern können. Oder über unseren Server zugänglich machen. Aber ein weiterer Zugang zu den vielfältigen Zugängen, die wir schon geschaffen haben. Aber das ist... Wo man dann nicht an unsere Oberfläche gebunden ist. Finde ich auch attraktiv. Also... Dann kann jeder sich das so einrichten, wie er will. **I: War das also ihre Haupte Erwartung, mit der sie in den Workshop gegangen sind?**

I8-4#B: Ja. Also vom... Ja. Also ich war natürlich auch neugierig: Was ist es eigentlich? Ich habe schon ein paar Mal so .... Also das war: Wie kann man das nutzen hier, wie bei uns im Hause. Und... Ich habe das auch hier vorgeführt bei uns, weil wir verschiedene große Textprojekte gerade am Laufen haben. Also die Kollegen hier, die haben gerade 2200 Gelegenheitsschriften aus dem 19. Jahrhundert – jüdische. Die kennt kein Mensch. Das ist keine hohe Literatur. Und die überlegen sich auch: Ja, 80 davon können sie irgendwie zurzeit..., bieten sie als PDF an. Aber das ist ja langweilig. Das findet auch kein Mensch. Und dann werden 30, glaube ich, neu herausgegeben. Aber was macht man mit den 2200? Und im Rahmen so eines... Also wir, ich, wir sehen TextGrid auch als Möglichkeit so eines Repositoriums, nennt man das, glaube ich? In dem man aber dann auch, in dem es nicht nur abgelegt ist, sondern in dem man auch arbeiten kann. Also nicht einfach Archiv, sondern wirklich Lab. Also... Das war so ein bisschen... Da bin ich auch nicht enttäuscht worden. Das kann ich eigentlich... Das sehe ich, das Potential sehe ich eigentlich jetzt darin.

**I8-5#I: Das freut uns natürlich. Was waren noch Erwartungen, die sie an den Workshop hatten und an das TextGrid-Lab?** B: Außer zu sehen, ob man damit arbeiten kann? Was ich sagen würde. Ja. Was könnte ich für Erwartungen...? Weiß ich nicht? **I: Hätte ja sein können.** B: Irgendwas? Mir fällt jetzt... Was hatte ich noch für Erwartungen? Nö. Ich war da recht offen und ... Ich hatte zum Beispiel nicht erwartet, dass es so stark auf TEI aufbaut. Ich dachte, da wäre XML, so... Aber dass man schon so sehr stark Strukturen vorgibt, halte ich für sehr wichtig. Dass man da nicht einfach jeden wurschteln lässt, sondern... Natürlich kann jeder wurschteln, aber man gibt auch als Projektträger, als TextGrid-Macher, auch ein paar Standards vor. Das halte ich für eine ganz, ganz wichtige Sache. Weil viele XML-Daten – ja, die sind dann unglaublich strukturiert, aber davon hat man gar nichts, weil jeder wieder sein eigenes, seinen eigenen Krams macht. Das können die Leute auch mit TextGrid-Lab machen. Aber TextGrid sagt doch: Hey, guck mal erst. Hier gibt auch Baseline-Encoding-Sachen. Das sind mehr Sachen, die hatte ich

nicht erwartet. Die haben eher meine Erwartungen so übertroffen als erwartet... Ja, ich hatte es ein paar mal gesehen auf den Itug-Tagungen und auch auf der Tagung im Januar, oder letzten.... Oder wann war das? Oktober. Da hatte ich es schon einmal gesehen. Also hatte ich so ein bisschen einen Eindruck. **I: Ok.** B: Von daher war es nicht so ganz neu. Ja, hatte ich vielleicht auch nicht so, ja, schon ein bisschen konkretere Erwartungen. Weiß nicht. **I: Ja, über die TEI-Standardisierung wird es ja auch, soll ja irgendwo ermöglicht werden, dass das eine Community ergibt, die eben auf Basis dieser Standards zusammenarbeiten kann.** B: Ja.

**I8-6#I: Haben sie eben auch schon erwähnt: Das Zusammenarbeiten. Könnten sie da noch einmal genauer darauf eingehen? Auf den kooperativen Ansatz. Inwiefern der für sie aus ihrer Perspektive von Bedeutung ist?** B: Also konkret ist es so, dass es ja... also praktisches Beispiel? Also wir arbeiten zurzeit aus verschiedenen Gründen nicht Online, nicht vernetzt, weil uns hier ein Server eingeschlafen ist und so weiter. Und wir haben jetzt ... Wir machen das jetzt viel per Telefon und E-Mail. Und wenn das TextGrid schon, wenn wir alle Zugang hätten, dann könnten wir eigentlich schon jetzt unsere Probleme an konkreten Texten schon jetzt einfach darüber verhandeln. Können wir natürlich auch mit Googles Text- und sonstwas machen. Aber da unsere Daten... Wie heißt das? Text and Tables oder Google-Docs machen. **I: Ja.** B: Aber hier haben wir schon die Struktur, die wir auch haben. Hier haben wir schon TEI. Da müssten unsere Sachen eigentlich funktionieren. Muss man noch ein bisschen am... Klappt noch nicht so. Ich habe es einmal ausprobiert. Klappt noch nicht so wie es sollte. Aber das wäre eigentlich so... Das wäre eine mögliche Perspektive. Und dieses Encoding für epigraphische Daten wird vor allen Dingen in London am King's College entwickelt. Und mit den Kollegen, wenn es wirklich darum geht: Wie kodiert man? Was ist das Markup für ein bestimmtes epigraphisches Problem, könnte man natürlich auch, wenn man einen gemeinsamen Editor hat, wesentlich sinnvoller diskutieren als über eine Markup-List, die es jetzt gibt. Also einfach per E-Mail, wo man es dann endlos beschreiben muss. **I: Ja.** B: Da kann man einfach... **I: direkt am...Objekt arbeiten.** B: ... einfach ein bisschen spielen, zusammenarbeiten. Ja? Das ist so. Das ist so etwas. Aber das war auch mehr hinterher. Habe ich mir gedacht: Das wäre eigentlich super. Das könnte auch da einschlagen. Ich glaube so etwas gibt es das auch noch nicht. Es könnte auch für die ganz interessant sein, auch das ja im Rahmen des D-Grids. Aber es könnte auch einfach außerhalb von Deutschland furchtbar interessant werden.

**I8-7#I: Sie haben an einer Stelle im Fragebogen geschrieben, dass Vergleich von Versionen und ... Das kann ich jetzt nicht lesen... Text...** B: Textzeugen! **I: Textzeugen. Ja. Sie meinen**

**damit, dass Versionierung für sie entscheidend wäre? Das war ein Punkt der wahrscheinlich, der noch nicht so ausgereift bei ihnen angekommen...** B: Hab ich einmal in Heidelberg gesehen, wo der Stefan Bündenbender das vorgeführt hat. **I: Ja. Genau.** B: Also so einen Entwurf. Das halte ich auch für eine interessante Sache. Also so eine History. Naja, so eine Vergleichs-History. Funktioniert, kann ich mir sinnvoll vorstellen.

I8-8#Auch so im Nachhinein, wäre auch so etwas wie, so eine Such- und Ersetzfunktion. Ich weiß nicht, ob es die überhaupt schon gibt? Wäre mir dann auch noch eingefallen. Ist mir auf dem Weg im Zug eingefallen. Und was mir auch noch fehlt... Oder sind wir da noch nicht? **I: Doch. Wir sind da, wo sie gerade...** B: ...wäre sowas: Ich habe die Möglichkeit, hier wirklich Annotations zu machen. Also TEI-konform. Die habe ich. Aber wenn man arbeitet, dann braucht man auch sowas wie Notepads. Da braucht man Dinge. **I: Was nicht offiziell...** B: Also niedrigschwellige. Also wenn man dann noch so ein Kästlein hätte mit: "Hier sind meine Gedanken", die ich jetzt mal nicht kodieren will, sondern einfach mal hinschreiben will. Das wäre auch noch super. Weil das mit den Wörterbüchern ist schon phänomenal. Und wenn man dann noch... Ich habe mir überlegt: Was fehlt mir jetzt noch in meinem Schreibtisch? Einfach so ein Zettelkasten. Das wäre auch noch eine tolle Bereicherung. Und mit dem Suchen und Finden das war was, was die Kollegen hier bei der Vorführung vermisst haben. Das man eben, wenn man Texte wirklich bearbeitet, man auch so ein strukturiertes Suchen manchmal gerne hätte. Oder so Register, so Lemmatalisten, die man dann auch erstellen kann - über den ganzen Text hinweg. Die machen ja oft dann so Fehlerkontrollen. Und da hätten die manchmal auch ganz andere Zugänge zu dem Text, der gerade online ist. Also außer „what you see is what you mean“ auch einfach vielleicht „Zeig mir alle Wörter, die drin sind“. Oder „Ordne mir irgendwas ganz anders“. Oder „Suche mir diese Kombination“. Auf jeden Fall habe ich noch nicht gesehen, dass es, vielleicht geht das alles schon, aber das war mir noch nicht so... **I: Ja. Das ist aber ein interessanter Punkt. Also auch Worthäufigkeiten, Wortvorkommen, Wortnachbarschaften und so Informationen...** B: Also so Sachen, die..., also ich bin ja überzeugter TUSTEPer, die da eigentlich gang und gäbe sind. Das würde sich glaube ich auch in so einem Kontext ganz gut machen. Und was ja andere, die vielleicht nicht aus TUSTEP kommen, noch gar nicht so im Blick haben und was XML-Editoren ja auch noch nicht so Blick haben, weil XML-Editoren ja einfach... Man fängt von oben an und hört unten auf. **I: Ja. Diese Volltext...** B: Ja genau. Aber auch da gibt es ja doch Möglichkeiten. Vielleicht wenn man ein bisschen anderes philologisches Werkzeug da reinzubekommen.

**I8-9#I: Ja. Wo wir gerade bei dem Punkt sind. Gibt es noch andere Dinge, die ihnen fehlen?**

**Oder wo sie Kritik üben würden? Was ihnen gar nicht gefallen hat?** B: Was mir nicht so gefällt und was auch einem Kollegen, der hat da ein trauriges Wochenende gehabt, dass wenn man wirklich Text leer eingibt – da wäre eine Benutzerführung, glaube ich, von Nöten. Also dass man zum Beispiel gefragt wird: „Gibst Du jetzt Prosa ein? Gibst Du ein Gedicht ein? Oder gibst du einen Wörterbuchartikel ein?“ Also... Und dass dann aus dieser Fülle von möglichen Kodierungen, die ja alle nicht falsch sind, ist da doch immer, dass relativ relevante Dinge dargeboten werden. **I: Also dass man praktisch schon ein Schema hat.** B: Genau. **I: Wenn man sagt, ich will einen Artikel machen, dass es dann, sagen wir mal so ein Rohgerüst gibt.**

B: Genau. Genau. Genau. Das haben wir uns überlegt. Das könnte praktisch sein. Weil wir da auch alle ein bisschen gescheitert sind. Oder? Ja, wie man so im XML-Editor ja auch scheitert. Das ist ja auch bei Oxygen. Da haben wir das Problem auch. Man muss...Ich glaube, wenn das jetzt echt einschlagen soll, wie eine Granate, dann muss... Wo waren wir? Bei...? **I: Bei den Schemata, beziehungsweise verschiedene Anleitungen...** B: Genau. **I: ... bei der Texteingabe.**

B: Also ich glaube... Ich habe auch schon so ein paar XML-Workshops gemacht. Also mitgemacht. Und ich glaube, es ist mal ganz... Die größte Hürde ist immer sich da... Man ertrinkt in dieser Tag-Flut. In der Markup-Flut. Und da könnte es ja über die Baseline-Encoding-Vorschläge, die ja wirklich toll sind und die auch erläutert sind, hat man ja eigentlich schon eine Vorgabe gemacht, auch was ganz Sinnvolles. Und wenn man die noch ein bisschen mehr vermittelt und auch einfach anpreist, anbietet, könnte es glaube ich ganz gut werden. Also unsere Erfahrung hier im Hause ist auch... – wir haben ja so eine Technikprogrammierfraktion – , dass das beim Durchschnittsphilologen, Geisteswissenschaftler überhaupt nicht im Blick ist. Dass man so arbeiten könnte. Und TextGrid ist wirklich etwas, also bisher glaube ich, was für Experten. Wir finden das cool. Wir finden das elegant. Wir sind alle neidisch, wie viel Geld da reingegangen ist. Aber um es bei den... Man braucht es ja eigentlich bei den... Es muss ja anfangen bei den Studierenden. Und da ist glaube ich ein großer Vorteil gegenüber so einem Oxygen, dass es ja schon über diese Baseline-Ideen irgendwie auch schon so Brücken hat. Es gibt ja schon so Vorschläge. Und die stärker... **I: Also das vermittelbar zu machen.** B: Ja. Ja. Ja. Also „leite mich jetzt“..., dass man Abfragen einstellt: Was will ich jetzt eigentlich? Also wenn ich suchen will – ok. Aber wenn selber Text eingeben will? Das ist immer noch ein starkes Stück Arbeit.

**I8-10#I: Also ist ja auch ein Punkt der Erlernbarkeit und Bedienbarkeit, ...** B: Genau. Genau. **I: ... die verbessert werden muss dann.** B: Genau. Genau. So eine Benutzerführung.

Würde ich sagen. Also bei TUSTEP mache ich das immer über Masken, über Schemas. Weil ich auch gemerkt habe: Du brauchst die Leute, wenn du die selber an so einen Editor setzt, das ist nicht deren Welt und das muss es auch nicht – deren Welt – das muss es ja vielleicht auch nicht sein. Und sie können trotzdem, wenn man das geschickt macht, können die trotzdem sehr gut strukturierte Daten abliefern. Das Ergebnis ist ja auch besser. Dann sind die auch glücklich und zufrieden und benutzen es nur noch. Also das hat ja schon so geklappt. **I: Ja.** B: Das war auch so ein Lernen. Am Anfang saßen die alle vor dem nackten Editor. Und ich musste dauernd rumlaufen und ihnen erklären, wie es funktioniert. Und das habe ich mir irgendwann gespart indem ich eben auch viel an Benutzerführung... **I: Also stärkere Führung bei Navigation.** B: Ja. **I: Bedienbarkeit allgemein.** B: Ja genau. **I: In Richtung Intuitivität.** B: Ja. Genau. Obwohl schon... Also ich finde es schon gut aufgebaut. Das ist schon sehr übersichtlich.

**I8-11#I: Hatten sie vorher mit Eclipse schon mal gearbeitet?** B: Nein. Noch nie. **I: Noch nicht.** B: Nein, noch nie. **I: Weil es darauf basiert.** B: Ja. **I: Deshalb frage ich. Einige Interviewpartner haben dann gesagt: „Ja. Eclipse kenne ich ja. Und von daher, alles super.“ Aha. Ist immer wichtig zu wissen. Ok. Ja. Der Punkt jetzt bei Eclipse. Der Punkt Individualisierbarkeit. Also im Sinne von Anpassen der Oberfläche an das eigene Arbeiten, aber auch Möglichkeiten zum Anschließen über Schnittstellen. Also anschließen von Tools. Inwiefern ist das für sie von Bedeutung?** B: Also das war zum Beispiel bei den... Also es wäre zum Beispiel für uns ganz gut, also wenn wir damit arbeiten würden, wenn wir schnell eigene Wörterbücher einbauen könnten. Also wir sind Hebraisten. Wir haben so etwas. Wir benutzen so etwas. Wir haben so ein epigraphisches Wörterbuch, was wir kontinuierlich erweitern. Aufbauen. Also das könnten wir auch in irgendein Format bringen und könnten es dann auch intern nutzen. Also wie funktioniert das? Und die Kollegen, die hier mit den 2200 Daten arbeiten, Texten arbeiten. Die haben so etwas wie ein begriffsgeschichtliches Wörterbuch, was sie so im Laufe der Arbeit erstellen. Und die tauschen sich jetzt da dauernd Dateien hin und her. Und die fanden das auch gleich interessant: Ja wie kriege ich denn jetzt... Wie könnte ich denn jetzt da mein eigenes Wörterbuch unterkriegen? So etwas wäre... Wie kriegt man die Tools, die man selber... Also wir sind alle keine Germanisten. Also kriegen wir aber die Tools, die wir brauchen, wie kriegen wir die da so schön rein, wie jetzt zum Beispiel die Trierer Wörterbuchsachen? Das würde uns interessieren. **I: Also einen Zugang zum Wörterbuchnetz. Also eine Anschlussmöglichkeit zu dem...** B: Relativ. Also wir sind alle gut in die Dinge dann kodieren. In die richtige Form bringen. Das können wir irgendwie im Haus. Aber wir müssten dann die Form kennen. Und das...

Dann wäre es interessant. Also... **I: Gut.**

I8-12#B: Irgendwo ist ein... genau, projektspezifische... weil wir haben ja nämlich so einen Zettel gemacht: projektspezifische Wörterbücher. Und was steht da unten? Halbautomatisches... Ach ja! Genau. Einfach weil wir das vorhin noch hatten, was wir uns noch so wünschen könnten. Wir haben viele Texte, die sind einfach Plain. Das sind einfach Texte nackt. Und die würden wir so einlesen wollen und sie dann im Editor nach und nach kodieren. Ich weiß nicht, ob das schon geht? Also da gibt es irgendwas von so einem Streaming-Editor. Ich weiß nicht, ob der schon funktioniert. Aber so etwas. Von mir aus, dass der einfach ein Rahmentag drumherum macht. Und was man dann..., dass man dann... **I: Anfang. Ende.** B: ...anfangen kann. Und dann den Rest projektspezifisch. Aber dass man erstmal die Sachen durch... Und dann kam der Wunsch: Und wenn ich es jetzt durchsuchen und sonst was könnte, könnte ich auch sehr schnell was damit anfangen. Man braucht ja nicht immer Dokumente, die schon von vorne bis hinten getaggt sind, wie das bei Wörterbüchern und so ist. Also was die Wegstein-Leute da gemacht haben. Klar, das kann man super taggen. Aber wir brauchen manchmal nur... Wir haben eine Riesentext und wir wissen: Die nächsten 5 Jahre interessiert uns nur dieser eine Paragraph. Und den würden wir dann gerne intensiv machen. Und wenn wir mal ganz viel Zeit haben den Rest auch. Aber dann würde uns eigentlich so ein Rahmen reichen. Und dann unser Nukleus. So was. **I: Also die ganze Kodierung kann auch eine Hürde darstellen?** B: Ja. **I: Zunächst. Ne?** B: Ja. Zunächst. Und um das... **I: Eine Barriere.** B: Eine Barriere. Genau. Dann braucht man einfach so einen Rahmentag. Und kann dann das machen, was man wirklich gerade braucht. Viele Sachen sind mir auch zu mustergültig. Also das ist dann... Das schreckt kolossal ab. Also man kann ja auch sich die Daten so strukturieren, wie man sie projektspezifisch braucht. Und dann hat man einen Riesenvorteil. Weil man es dann nicht suchen kann. Und. Ja. **I: Ja. Es ist auch in dem Sinne eine Barriere, wenn man es vermitteln will...** B: Ja. **I: ... an weniger versierte Nutzer, ...** B: Genau. Genau. **I: ... dass die eben vor der Kodierung stehen.** B: Stehen. Ja. **I: Und dass dann nicht...** B: Muss ich das denn jetzt? Brauche ich das denn jetzt? Und was ist der Unterschied zwischen L und LG und so Sachen. Also das ist ja alles ganz furchtbar für Anfänger. **I: Ja. Ja ich bin auch noch nicht so... Ich kann das gut nachvollziehen.** B: Also von Plaintext nach XML haben wir das genannt. Genau. **I: Von Plaintext nach XML. Ah ja.** B: Das hätten wir gerne. Also den Weg beschrieben. **I: Wo wir gerade bei ihrem Zettel sind - Gibt es da noch Punkte?** B: Nein, die habe ich gerade gesagt. **I: Dann halten wir uns da nämlich auch gerade dran.**

I8-13#B: „Find & Replace“ – also ich will aus A, B machen. Oder ich weiß, in meinem Text

kommt Herr Müller vor. Und ich will jetzt Herr Müller... Ich will jetzt mal alle Herr Müllers haben und denen das Personal tag geben, sodass also nunmehr so ein Text nach und nach... Also wir sind immer davon ausgegangen: Wir und unsere bescheuert OCR erkannten Texte, die wirklich total beknackt sind. Aber die haben wir. Und die wollen wir jetzt strukturieren. Und da haben wir gedacht: Toll wäre: Wir laden die rein und wissen, welche Namen da drin sind. Gehen das vielleicht absatzweise durch auf bestimmte Stichworte. Also diese Begriffsgeschichtler, das sind so Strukturanalytiker. Und die suchen so bestimmte Diskurse. Also die haben dann einen Absatz. Da gibt es jetzt ganz viel zum Nationenbegriff im 19. Jahrhundert. Und sowas würden die gerne angeben. Das würden die markieren. Und sowas können die auch suchen. Da haben die bestimmte Stichworte, die dann vorkommen. Stamm. Volk. Irgendwas. Und dann weiß man, das ist schon ganz richtig. Also das wäre so „Find & Replace“. Und Replace wäre dann vielleicht auch mit Taggen versehen.

I8-14#Und dann eben ... Und dann so ein projektspezifisches Wörterbuch, so ein begriffsgeschichtliches Wörterbuch steht da noch.

I8-15#Und dann eben, ja, halbautomatisches Konvertieren. Fänden wir auch ganz großartig. Dass man eben einen Text hochlädt. Und dann gefragt wird: „Wie willst du ihn haben? Wie tief soll es gehen? Soll ich suchen, ob es Überschriften gibt?“, meiner Meinung nach. So plain sind ja die Texte oft nicht. Manchmal gibt es ja doch Hinweise, was es so sein könnte. Das war so ein Beispiel. **I: Das ist ja schön.** [kurzes Zwischengespräch mit einer/m hinzugezogenen Kollegin/Kollegen] B: Also mir ist es so ähnlich gegangen. Und da wäre eben wichtig, dass das Programm sagt: „Hey, was willst du gerade?“ Dass man so ein... Ich glaube, da schon so viel vorstrukturiert ist, wäre das auch gar nicht so furchtbar schwer. **I: Ja.** B: ... dass man so sagt.... **I: Also auch bei diesem TEI-konformen Arbeiten. Dass man ein bisschen was abgenommen kriegt. Ohne sich genau mit diesen TEI-Guidelines detailliert auszukennen.** B: Genau. Genau. Genau. Also so arbeite ich ja mit meinen epigraphischen Daten. Da gibt es ein fest beschriebenes Format. Das ist TEI-konform. Und da muss ich jetzt nicht immer überlegen: Ich bin gerade in der Edition. Was habe ich denn da? Sondern das weiß ich schon. Weil mir das schon in den Guidelines vorgegeben ist. Also da habe ich es dann auch nicht furchtbar schwierig. Das wird dann alles mit Division gemacht und so. Das ist alles sehr schön. Das kann auch jemand lesen, der sich jetzt noch nicht sein ganzes Leben... Der nicht zu den dreißig Leuten gehört, die das mitentwickeln. Also das ist auch so... Also meine Kollegen schaffen das auch, ohne dass sie sich überhaupt jemals mit den Guidelines beschäftigt haben. Aber so gibt es schon... Gibt ja



schon bei vielen... Die Briefe und so. Das sind ja alles so Sachen, die ja schon sehr stark... Da weiß man schon: Ah, ich will Briefe edieren. Dann habe ich dieses Baseline-Encoding. Dann brauche ich doch eigentlich nur das. Und der Editor jetzt bietet mir aber immer die ganze Fülle an. **I: Ja. Also so eine Art Formatvorlage. Vereinfacht gesagt.** B: Ja. Genau. **I: Ja. Das ist interessant.**

**I8-16#Was ich auch ganz interessant fand, was [Anonymisierung: ihr/e Kollege/Kollegin] eben erwähnt hat und was sie auch in der Arbeitsweise, die hier oft angewandt wird, vorkommt: Neue Erkenntnisse. Also mit den Mitteln, die TextGrid bietet, oder die andere digitale Werkzeuge bieten, neue Erkenntnisse, wissenschaftliche Erkenntnisse erlangen. Was sehen sie da für Möglichkeiten? Aus ihrer Perspektive und das, was hier passiert? Das scheint ja ein Punkt zu sein.** B: Ja. Einfach. Wir sind ja ein Orchideenfach. Also jiddische Studien, Judaistik bewegt sich immer zwischen Geschichtswissenschaft, Philologie, Kunstwissenschaft. Wir haben ganz viele..., also unsere Kollegen..., also wie wir hier arbeiten, unsere zehn Leute haben alle sehr unterschiedliche Hintergründe. Also wir sind recht interdisziplinär aufgestellt und wissen, dass wir Texte haben, die vielleicht auch für Symbolforscher, Kunsthistoriker interessant sind. Und damit, dass nicht nur meine Kollegen erkennen, ist es eben wichtig, dass ich die so öffentlich wie möglich mache. Was [Anonymisierung: die Kollegin/der Kollege] erzählt hat. Kafka. Für uns ist Kafka interessant, vielleicht historisch interessant, weil uns Prag interessiert. Oder weil uns bestimmte jüdisch-theologische Anspielungen in seinem Werk interessieren. Das ist vielleicht ein anderes Interesse, als es Germanisten haben, als es Linguisten haben. Und wenn ich dann meine spezifischen Fragestellungen habe und dann gleichzeitig sehe: Hey, jemand anderes macht da was völlig anderes draus. Dann bereichert mich das ja. Und unsere Daten, meine Grabinschriften sind vielleicht auch interessant für Germanisten, die deutsche Barockgedichte untersuchen. Und für die ist vielleicht interessant, dass es auch einen Widerhall findet auf diesen Inschriften des 18., 17. Jahrhunderts. **I: Das wäre ja jetzt...** B: Das erwarten die gar nicht. **I: Ja. Ja.** B: Und ich erwarte... Ich müsste mühsam suchen: Was gibt es jetzt eigentlich zeitgenössisch im Nichthebräischen in der Dichtung. Das hat man ja noch nicht so. So gemeinsame Textkorpora, die dann auch sinnvoll strukturiert sind, vergleichbar strukturiert sind. Ich muss dann wirklich immer bei... Mehr oder weniger zufällig finde ich dann mal was, über Google dann meistens. **I: Ja. Gut. Das wären jetzt Austauschprozesse. Also Erkenntnisse austauschen und dadurch neue Perspektiven gewinnen.** B: Ja. **I: Was ja auf digitalem Wege wesentlich einfacher ist**

**oder schlichtweg manchmal anders gar nicht möglich wäre.**

**I8-17#Aber sie haben eben zum Beispiel gesagt: So einfache Instrumente wie „Zeige mir die und die Wörter“ oder „benachbarte Wörter“? Da geht es ja drum, Muster zu erkennen oder zu selektieren auf einem Wege, der vielleicht auf konventioneller Art und Weise nicht so einfach möglich wäre.** B: Ja. I: **Wo sind da noch Möglichkeiten in Ihrer Arbeit? Also im Sinne von Mustererkennung mittels digitaler Instrumente oder Ähnlichem?** B: Ja. Ja. Gut. Warum ist mir das nicht so... Ich... Wir machen eben sehr, sehr viel mit TUSTEP hier. Und da können wir das ja alles schon. Also das ist jetzt nicht so was, was wir vermissen. Vielleicht liegt das daran, dass ich das nicht so erzähle. Weil wir damit ... Deshalb sind wir auf TUSTEP übergegangen. Weil das ein sehr mächtiges Werkzeug ist für Sortieren, für Muster erkennen, für Pattern Matching und solche Dinge. Warum könnten wir von TUSTEP... Wo könnten wir TUSTEP verlassen und also... Also wir würden da eigentlich erst weggehen, wenn wir in einem großen Textkorpus mehr von, ja, vielen Textkorpora wühlen könnten mit unseren TUSTEP-Möglichkeiten. Also wenn TextGrid diese Such- und Mustererkennungs-Möglichkeiten bietet, die TUSTEP jetzt schon hat. Dann würde es vielleicht auch interessant werden, in so eine Recherche, was weiß ich, nach Akrostichen, so Wortanfängen, auch auf fremde Textcorpora zu gehen. Aber dann bräuchten wir erst die Recherchemöglichkeiten.

**I8-18#I: Also die Infrastruktur. praktisch.** B: Die Infrastruktur. Also für uns ist zurzeit das Interessanteste, glaube ich, daran einfach der Repositoriumsgedanke. Dass man einfach eine gemeinsame, in dem Textverarbeitungssystem, über eine Vielzahl von Texten gemeinsam verfügen können. Das ist glaube ich für uns das Interessanteste hier. Nicht so sehr die... Auch für [Anonymisierung: sie/ihn] glaube ich nicht, weil [Anonymisierung: sie/er] auch da seine eigenen Werkzeuge hat, die schon sehr... Also wir benutzen alle kein Word hier. Also wir sind alle schon... Wir haben da schon unseren Weg gefunden. Nur auf dem eigenen Rechner im Institutsnetzwerk und nicht darüber hinaus. Und auch wenn unsere Onlinepräsentationen sehr dynamisch sind, ist es ja immer nur... Da kann ja keiner..., die andere Seite noch nicht so furchtbar viel reagieren. Die kann sich das da rausholen. Die hat da Open Access zu. Die kann das wirklich in ihren TEI-, in ihren Editor holen als XML, als TEI. Aber sie kann nicht direkt reagieren. Sie kann es nicht als eigenes Dokument speichern und dann wieder an uns zurückmelden und erweitern. Und das ist glaube ich was so bei den, ja, bei unserem fachlichen Hintergrund auch... Wir finden, dass wir vieles anzubieten haben, was für andere Fächer auch interessant wäre. Nur die gucken nicht auf uns, weil wir so klein sind. Und bei Epigraphik

sowieso. Wenn man das dann einstellen könnte, wäre das, glaube ich, das Interessanteste. Und nicht so sehr den Texteditionsaspekt, den TextGrid ja auch hat. Ich glaube, das interessiert uns zurzeit nicht so, mich zurzeit auch nicht so. **I: Ja. Also für sie ist diese Vernetzung, das Größere erstens einmal was Arbeitsprozesse angeht, aber auch was Inhalte angeht, in einem größeren Stil wichtig.** B: Ja. Ja. Das ist, glaube ich, so. Ja. **I: Und wenn ich sie jetzt richtig verstanden habe, dann zweifacher Hinsicht. Nämlich zum einen, um wahrgenommen zu werden.** B: Ja. **I: Und zum anderen, um sehen zu können: Was machen die anderen?** B: Ja. Genau.

**I8-19#I: Meine nächste Frage wäre dann. Wenn dieses Netzwerk gegeben ist. Das Problem eines Netzwerkes ist ja immer, dass man sich auch darin verfangen kann.** B: Ja. **I: Also wenn man... Das Gesehenwerden bedeutet: Es muss ja etwas geben, was sie sichtbar macht.** B: Ja. **I: Und andererseits muss es etwas geben, was ihnen Orientierung verschafft indem was sie sehen können. Wo sie vielleicht anknüpfen können.** B: Ja. **I: Ja. Wie sehen sie das? Was sehen sie da für Möglichkeiten beziehungsweise Gefahren? Oder wie stellen sie sich das vor, dass das gut nutzbar ist?** B: Naja. **I: Wenn jetzt praktisch schon dieses Netzwerk geschaffen wäre, das für sie ja interessant wäre?** B: Also wenn man was... Also die Sachen, die wir freistellen würden, könnten, wären ja schon relativ gut strukturiert. **I: Ja.** B: Und damit sind sie, glaube ich, auch für Fachfremde gut nutzbar. Und die Erwartung wäre, dass anderen geholfen wird, ihre Daten auch ordentlich zu strukturieren. Nicht bis in die letzte Tiefe, aber so, dass... Wenn das gegeben wäre... Tja man weiß ja nicht, ob man es vorher gebrauchen kann. Aber das kann ich jetzt überhaupt nicht ausprobieren. Aber ich glaube, wenn etwas gut strukturiert ist, kann man es auch einfach..., nimmt man es auch überhaupt erst wahr. Also wir sind in den letzten Jahren in verschiedenen interdisziplinären Projekten gewesen, so landesgefördert und so. Es ist immer interessant, wie Historiker, wie Germanisten, ein und denselben Text lesen. Und wie schwierig... Und gerade Judaisten sind ja immer außen. Aber diese Germanisten und diese Historiker, die haben im selben Projekt, mit demselben Text, völlig unterschiedliche Zugänge und haben sich überhaupt nicht verstanden. Und das ist interessant. Das merkt man erst, wenn man vernetzt arbeitet, was für unterschiedliche Brillen man auf hat und wie schwierig das ist. Die sind aufeinander losgegangen und wir mussten immer dazwischen. **I: Ja.** B: Das war so ganz lehrreich. Und das hat uns auch beide, also alle drei Seiten, dann auch weitergebracht. Die Judaisten, die Germanisten und die Historiker. Also wir sind hinterher anders herausgekommen als vorher rein. Das ist eigentlich so, wie man sich interdisziplinäres Arbeiten eigentlich vorstellt.

Man schmeißt nicht einfach Sachen rein, sondern man guckt auch ... Man weiß auch, dass andere das völlig anders lesen können. Und das ist was, was bei TextGrid dann wahrscheinlich von alleine passieren könnte. **I: Ja.** B: Einfach: Man sieht einen Germanisten, den interessieren völlig andere Dinge als den Historiker an ein und demselben Text. Der... Weil die unterschiedlich taggen oder weil die anders... oder weil die andere Aspekte hervorholen. Und Linguisten haben ja wieder einen völlig eigenen Zugang. Und dass man das sieht, ist, glaube ich, für die Philologie und Geisteswissenschaften... hilft uns. Weil wir doch sehr in Nischen verhaftet sind. **I: Ja. Also dass man das sieht. Damit meinen sie also die Strukturen, die von der Community oder dem Fach geschaffen werden. Dass die auch sichtbar sind für andere Fächer.** B: Ja genau. **I: Eine Abbildung dieser Netzwerkstrukturen.** B: Ja. Genau. Genau **I: Ok.** B: Weil, was ich bekomme, sind ja getaggte Texte. Und Markup ist ja nichts..., ist ja doch immer subjektiv. **I: Ja.** B: Und das erweitert uns, glaube ich, so. **I: Also müsste die Infrastruktur, oder die Netzwerkstruktur, die von TextGrid, von den Entwicklern geschaffen wird, eigentlich nur praktisch so die größte, die größere Autobahn sein. Und dann ...** B: Finde ich ja. **I: Und das feinere Netzwerk sollte aus der Community entstehen, weil da auch Denkweisen abgebildet werden.** B: Wenn ich König wäre, würde ich das genau so... Ja. Ich glaube so könnte das klappen. Ja. I: Ok.

I8-20#B: Also es muss... Es ist gar nicht so um Texte fertigzumachen, sondern... Also abschließend der Welt zur Verfügung zu stellen, sondern einfach... Ja. Erstmal dass sie überhaupt zur Verfügung stehen und nicht nur einfach so, wie im Oxford Textarchive. Da von hinten nach vorne. Also das ist schon. Das ist: Texte, die in Arbeit sind. Dass das vorgestellt wird. Nur glaube..., weiß immer. Ich höre das immer... Also wir stellen unsere Sachen immer ganz gerne Online. Und viele haben dann... Da hängt dann das ganze Leben dran und dann sterben die Editionen mit dem Tod des Forschers, der dreißig Jahre lang an einem Text gearbeitet hat. Und dann ist das alles weg. Und das haben wir ein bisschen... Also die Erfahrung haben wir schon gemacht, dass wir unsere epigraphischen Bücher, nur ein sehr kleines und dann auch noch das falsche Publikum erreicht haben. Und dann entweder sofort vergriffen waren, oder eingestampft wurden. Und dadurch, dass wir Online gegangen sind, hat uns das auch wirklich sehr bereichert. **I: Ja.** B: Also wir bekommen auf einmal aus Australien Anregungen zu unserem Text und zum Verständnis unserer Texte. Das ist interessant. Also wir haben schon sehr positive Erfahrungen gemacht mit vernetzten Onlinearbeiten. Nun ist es ja gar nicht... über E-Mail vernetzt. Aber auf jeden Fall wird reagiert auf einen Text, der öffentlich zur Verfügung steht. Und das gibt es

eigentlich viel zu selten. **I: Ja. Gut. Da sehen sie also auch den größten Fortschritt, der durch TextGrid möglich wäre.** B: Ja.

**I8-21#I: Und wo sehen sie noch das größte Manko? Die größte Schwierigkeit?** B: Dass man... Wir sind seit... Seit kurzem lehren wir hier auch. Wir sind ja ein Forschungsinstitut. Und seit kurzem machen wir auch..., geben wir auch mal Lehrveranstaltungen an der Uni. Bei den Geschichtswissenschaftlern. Und da gibt es Hausarbeiten. Und da merkt man, dass... Also bei diesen jungen Leuten da, die... Das ist überhaupt nicht mehr so dieses strukturierte Herangehen an Texte. Das ist überhaupt nicht gelehrt wird. Also ich glaube man muss, wenn man irgendwie mal ein gutes Ergebnis haben will, dann muss man wirklich die Studierenden von Anfang an damit bewerten. Ich weiß nicht wie. Irgendwie. Die müssen das lernen. Man muss die dazu zwingen, strukturiert zu arbeiten und nicht einfach so loszuschreiben. Also auch die Hausarbeiten, die man bekommt, das war so eine Erfahrung. Wir haben das alle... Wir waren fünfzehn gewesen. Alle jahrelang aus der Uni. Die haben uns einfach gefragt: Macht ihr was? Wir haben was gemacht und waren alle ziemlich entsetzt, was man bekommt. Und offensichtlich wird es ja nicht mehr vermittelt. Und das sind alles... Geschichtswissenschaftler sind ja auch irgendwie Geisteswissenschaftler. Irgendwie fehlt es da an Struktur. Wir sind... Also Herr X und ich. Wir sind so beide... Als Computer in die Geisteswissenschaften kamen, sind wir auch so ungefähr dazugekommen und haben das von Anfang an mitbekommen. Und das fehlt heute irgendwie, wenn man nicht gerade in Trier oder in Göttingen und in Würzburg studiert, hat man überhaupt keine Chance, das mitzubekommen. Und ich glaube, auch wenn wir Sammelbände machen. Was man dann bekommt an Texten, dann fehlt es so an diesem... Was ist das? EDV? Datenverarbeitungsgrundwissen. Und da sehe ich die größte Gefahr für TextGrid, dass wir hier Texte liefern, aber dass es bei der Community, die man sich wünscht, überhaupt nicht ankommt, weil die nur böhmische Dörfer verstehen. Wie man das Problem löst? Da habe ich keine Ahnung. Aber das sehen wir. Auch hausintern gibt es auch eine Fraktion, die nutzt unsere Onlinedatenbank ganz stark. Aber an der dahinter liegenden Struktur? Interessiert die nicht. Muss sie ja auch nicht interessieren. Weil es funktioniert. Aber wenn man Beiträge will, dann muss man doch irgendwie... **I: ...soweit auf sie zugehen, bis die Barriere überwunden ist.** B: Bis die Barriere überwunden ist. Und da sehe ich die größten Schwierigkeiten. Haben wir hier auch lange lange für gekämpft – als Projekt. Also so Programmierer und Leute, die so Editionsprojekte betreuen. Das ist wirklich schwer. Diese Mentalitäts... Weiß auch nicht, ob es da Lösungen gibt. Aber wenn TextGrid nur von zwanzig Leuten benutzt wird, dann wäre es schade. Aber wo sollen

die anderen herkommen. Das weiß ich nicht. Also werde ich zunehmend skeptischer. **I: Ja. Ein zentrales Problem.** B: Also ich komme ja aus der ITUG. Ja? Und auch da. Die meisten geben ihren einzelnen Text aus. Und am Ende steht das Buch. Und damit ist es gestorben. Also Austauschformate, gemeinsame Formate, auch XML ist auch da. Bei Leuten, die eigentlich schon vor dreißig Jahren strukturiert gearbeitet haben, ist wenig Verständnis für da – Buch und Schluss. Und dass es dann eigentlich erst interessant wird. Oder all das, was nicht ins Buch ist, dass man das ja auch irgendwie...Ja. Es trägt ja auch zum Verständnis bei. **I: Finde ich eben auch.** B: Ja? Das finden eben nicht so viele. Und das ... Ja. Werde ich zunehmend pessimistischer. **I: Ja. Ok. Ja, das Problem ist in der Tat zentral.**

**I8-22#Auch was das angeht: Ich teile meine Erkenntnisse nicht gerne und stelle die nicht einfach zur Verfügung. Das ist auch noch eine große Barriere.** B: Ja. Das... Ja. Also auch hier. Wir wollen dann. Also... Wir machen das einfach viel. Wir stellen viel online. Aber kommt dann immer: Ja, aber können wir das alles umsonst machen? Und kommt mehr Geld für...? Ich meine, wir werden ja bezahlt durch irgendwelche Mittel. Und warum sollten wir es dann nicht öffentlich zur Verfügung stellen? Aber das sind nicht immer so... Das sind dann doch oft meine Inschriften und meine Texte. Das ist so. Das ist einfach wahrscheinlich so eine... Weiß nicht wie man das rauskriegt? Aber das sitzt doch sehr sehr tief. Und dann werden auch bestimmte Fächer, Texte gar nicht wahrgenommen, weil sie gar nicht... Sie kommen als Buch, was man dann Müttern zu Weihnachten schenkt. Und die liest es dann nicht. Aber mehr passiert ja nicht. Naja gut. Das ist... **I: Naja. Wir arbeiten daran.** B: Ja, das werde ich auch. **I: Gut. Vielen Dank.** B: Ja. Gerne geschehen.
