# Supplementary material
Source: publisher site journal article supplement (https://www.degruyterbrill.com/publication/isbn/9783110463927/downloadAsset/9783110463927_Interviews.zip)
Supplement: Supplementary file 28 [file I9.pdf › Interviews/I9.pdf]

**I9-1#Interviewer: Zunächst würde ich eben gerne etwas über ihren Hintergrund wissen.**

**Und zwar ihre EDV-philologische Tätigkeit und Erfahrung. Wie würden sie die beschreiben?**

Befragte/r: Ich bin 2007 mit dem Studium fertig geworden. Ich habe Computerlinguistik und Musikwissenschaft gemacht. In meiner Magisterarbeit ging es auch schon um eine Edition beziehungsweise, ich habe das damals Edition genannt, würde das so nicht mehr tun. Das war eigentlich nur eine Transkription einer Quelle die ich dort hatte. Und jetzt arbeite ich für die W-Gesamtausgabe. Und da beschäftige ich mich insbesondere mit dem Briefwechsel, der eben dann auch Hybrid herausgegeben werden soll. Also sowohl digital als auch gedruckt. Und von daher ist meine Erfahrung jetzt nicht besonders lang. Aber ich denke... Also nicht zeitlich ausgedehnt. Aber ich habe schon ein bisschen etwas gesehen in dem Bereich – eben Musik und Germanistik. Und EDV-Kenntnisse eigentlich auch sehr gut dann in dem Kontext. Ja. **I: Auch XML-Editoren?** B: Ja. Ja genau. Also XML, XSLT und Java-Script und diese Sachen. Also da, würde ich sagen, bin ich schon fortgeschritten. Aber ich habe jetzt eben keine jahrelange Beschäftigung als Fachwissenschaftler mit, was weiß ich, mit musikwissenschaftlicher Edition. Also das... Da bin ich jetzt erst so ein bisschen reingekommen eben auch. Aber darüber, über unser Projekt, was eben auch so einen Netzwerkgedanken hat, ist es so, dass man mit vielen verschiedenen Ausgaben zu tun hat. Das ist eigentlich glaube ich auch sehr vorteilhaft.

**I9-2#Also wir kooperieren mit H, S, mit D und diversen..., so dass man auch in verschiedene Editionsrichtlinien oder auch Vorgaben so ein bisschen reinkommt. Ja. I: Also ist für sie die kooperative Komponente auch besonders interessant. Auch im Hinblick auf TextGrid. B:**

Die kooperative Komponente... ja. Also die gibt es, finde ich, auf verschiedenen Ebenen. Also wir haben das hier immer, dass wir zum Beispiel in der W-Gesamtausgabe auch so zwei Abhängigkeiten haben. Also wir haben hier eine Stelle und wir haben in B eine Stelle. Und wenn man jetzt diese, ich weiß nicht ob es ein besonderer Fall ist, die musikwissenschaftlichen Editionen sind oftmals an so Editionsinstitute gebunden. So dass man hier einfach alle Quellen in Kopie oder wie auch immer schon vorliegen hat, und man würde die Sachen natürlich gerne allen zur Verfügung stellen können. Ja? Ich meine, früher hatte man die Sachen dann verschickt und sowas. Aber es wäre natürlich schön, wenn man eben tatsächlich ein Repository hätte, wo alles drin wäre und alle könnten zugreifen. Das wäre schon super. Und darauf, die Idee ist natürlich noch viel größer, ich glaube was Herr J auch immer... Na dieses Wagenheberprinzip, dass man

dann tatsächlich alle, also damit meine ich eben nicht nur unser Editionsinstitut, sondern eben auch andere. Was weiß ich? T, oder so. Die dann tatsächlich auf unsere Daten zugreifen können, selber etwas einspeisen und das ist dann, glaube ich, noch mehr der TextGridgedanke. Also das ist supercharmant, aber noch eine Ebene darüber. Also für uns wäre es auch einfach schon hilfreich, sage ich einmal, im internen Kreis so eine Struktur zu haben, in der man zusammenarbeiten kann. **I: Also projektintern.** B: Projektintern. Ja, genau. **I: Und als nächste Stufe dann auch in Verbindung mit anderen Projekten oder auch andere Disziplinen.** B: Genau. Ja. Genau. Ich denke, das ist dann technisch ja auch nicht mehr das Problem, ob man das jetzt für 5 Leute macht oder für 500, 1000 oder so. Das ist wahrscheinlich tatsächlich nicht mehr das Problem.

I9-3#Aber es ist glaube ich... Es wird schwer, in diesen Kategorien dann zu denken. Also dass man sagt, auf einmal können alle da zugreifen, beziehungsweise auch wenn es natürlich über Rechteverwaltung irgendwie geregelt ist und so. Aber das ist natürlich schon noch ein Gedanke mehr, dass man auch seine ganzen Daten freigibt. Dass man die, wenn es nur lesbar ist und so, einsehen kann. Das ist schon im Kopf auch ein Wechsel. **I: Ja. Ja. Es bedeutet Umdenken für viele.** B: Ja, genau. **I: Auch in den verschiedenen Disziplinen ist das ja auch noch eine bekannte Hürde, die...** B: Ich glaube man muss sich auch immer vorstellen, früher war es ja so: Wenn die Sachen veröffentlicht wurden, dann erblickten sie erst das Licht der Welt, der Öffentlichkeit. Man hatte sozusagen einen festen Termin. Ich arbeite, ich arbeite, weiß nicht, über Jahre oder sowas und irgendwann gebe ich dann ab und das ist dann fertig. Das wird veröffentlicht. Und jetzt ist es glaube ich so, dass dieser Veröffentlichungstermin schon viel früher stattfindet. Also man gibt schon sozusagen seine ersten Rohdaten und auch die ersten Arbeitsrohdaten irgendwie ein, also wo man selber noch weiß, dass es fehlerbehaftet ist und sowas. Und dass man sowas eben schon veröffentlicht ist, ist glaube ich, dafür gehört auch ein mentaler Wandel irgendwie dazu.

**I9-4#I: Wie sehen sie das denn? Halten sie das für möglich, dass dieses Umdenken stattfindet und ein System wie TextGrid dann auch wirklich genutzt wird? Angenommen wird? Oder sind sie da eher skeptisch?** B: Ich glaube, das dauert noch ein bisschen. Aber ich... Ich für meinen Teil denke, dass ist ein ... [Unterbrechung] Wo war ich denn stehengeblieben? Ah, bei dem TextGrid, ob das angenommen wird, oder so. **I: Ja. Es dauert noch ein bisschen seitdem ...** B: Ja, ich glaube, es dauert noch ein bisschen. Es ist eine Generationensache und so. Ich kann mir das bei... Also von den Leuten, die ich aus dem musikwissenschaftlichen Bereich

kenne so, denke ich, ist es schwierig. Wir merken selber immer, wenn wir mit Ideen kommen oder so was, was unsere Software oder so angeht, dass man eigentlich eine ganze Menge Überzeugungsarbeit leisten muss. Weniger irgendwie... Also die Leute sind eigentlich, sind... Eigentlich sind sie immer toll, aber man muss Überzeugungsarbeit leisten, dass sie es dann selber auch machen wollen. Also das... Also diese Arbeit ist ein ganz großer Teil. Also neben diesen ganzen technischen Entwicklungen ist Überzeugungsarbeit. Das Kommunizieren ist ganz ganz wichtig, glaube ich, in dem Kontext. Aber ich kann mir nicht... Jeder nutzt ja die digitalen Möglichkeiten. Sei es nun Wikipedia oder so was. Keiner geht mehr an das Regal und greift sich das Lexikon. Jeder guckt bei Wikipedia nach. Und genauso wird das auch mit all diesen ganzen anderen Sachen sein. Dass niemand mehr zu seiner gedruckten Briefausgabe greift, sondern ... Also gerade im wissenschaftlichen Bereich, wo du ja weniger eine Leseausgabe brauchst. Du hast ein bestimmtes Stichwort. Du hast eine bestimmte Fragestellung. Du musst es nachgucken, vielleicht auch über eine bestimmte Quantität von Daten willst du irgendwelche Sachen wissen. Und dann greifst du eben dann zu TextGrid oder formulierst deine Suchanfrage. Da wirst du nicht mehr irgendwie seitenweise blättern wollen, aber. Auf der anderen Seite brauchen wir natürlich auch eine kritische Masse, irgendwie, an verfügbarem Material. Das ist natürlich noch so ein bisschen die Crux. Und die kann man aber erst erstellen, wenn die Leute auch wirklich dann mit arbeiten. Also da weiß ich auch nicht, wo man genau ansetzen soll. **I: Ja. Das kommt ja auch, hängt davon ab, inwiefern die Community dann auch da etwas einspeist. Ne?** B: Ja. Ja, ja genau. **I: Aber die muss ja erst entstehen.** B: Ja. Die Community, also dieses Communitybuilding, wie man so schön sagt, ist auch ein ganz wichtiger Punkt. Das muss forciert werden. Ja klar.

I9-5#Aber dafür braucht man auch wieder Schulungen, denke ich, und so. Gerade wenn man an solche Sachen denkt wie TEI-Kodierung oder so. Dann ist ein..., sehen die meisten Leute immer erst die technischen Probleme. Also für sich. Das Verständnis. Jeder hat es schon einmal gehört, bedient aber keine Oxygen oder so. Ne? Also das sieht erst einmal irgendwie alles anders aus, ist ungewohnt. Bis man dann zu dem Punkt kommt, wo man sagt: Ich kann damit aber meine fachlichen Ansprüche viel besser befriedigen. Weil ich die Sachen auf einmal nicht nur kursiv und fett machen kann, sondern ich kann sie eben viel reicher auszeichnen. Bis man an den Punkt kommt, da braucht man ganz viele Anleitungen. Oder so. Also ich glaube man muss da ganz viele Schulungen machen. Also. Ja. **I: Ja. Schulungen auch in Form solcher Workshops, oder? Was sehen sie da noch als gute Form um das den Leuten näherzubringen?** B: Ich

muss... Wir stehen vor einem ähnlichen Problem, dass wir uns fragen: Wie genau... Wie bringt man es den Leuten näher und wo setzt man an? Und man hat dann immer auch das Problem, gerade bei solchen EDV-Workshops, dass die Vorkenntnisse ganz unterschiedlich sind. Also das war jetzt auch in T bei diesem Expertenworkshop das Problem, dass da Leute saßen, die kaum einen Computer bedienen konnten und andere, die sehr sehr firm sind. Und der eine langweilt sich und für die anderen ist es zu schwierig. Und da erst einmal ein gemeinsames Level herzustellen ist, glaube ich, sehr... Also ich weiß nicht, wie man das machen kann. Also wir versuchen jetzt hier irgendwie so XML-Kurse auch schon für Studenten und sowas anzubieten. Dass man da irgendwie wenigstens so diese Grundkenntnisse von..., auch vielleicht einfache Scriptsprachen oder so was. Dass man so ein bisschen Gefühl dafür hat, wie der Computer funktioniert. Also abseits von einfacher Textverarbeitung, sondern wie man auch mit Daten maschinell umgehen kann, die man ja dann braucht für die EDV-Philologie. Ich glaube man müsste... Man muss tatsächlich von ganz vorne anfangen mit irgendwelchen Grundkursen, um dann zu solchen anwendungsspezifischen Sachen zu kommen, wie jetzt TextGrid-Lab, oder sowas. Aber das ist auch so ein Henne-Ei-Problem.

**I9-6#I: Ja. Gut dann: Unterschiedliche Vorkenntnisse ... Um möglichst viele zu erreichen, auch mit wenigen Vorkenntnissen ..., es wäre ja dann entscheidend, die Bedienbarkeit möglichst einfach zu gestalten. Also es ist ja irgendwo die Hürde dieser Kodierung. Man muss mit dem XML-Editor umgehen können und ähnliche technische Schwierigkeiten. Sehen sie da einen Lösungsweg?** B: Ah, ehrlich gesagt auch nicht so ganz, weil ... Also diese Vereinfachung oder die intuitive Bedienung einer GUI, oder so, bedeutet ja auch irgendwo, dass man auch die Möglichkeiten wieder einschränkt. Oder mir ist etwas nicht klar: Also wie das sonst funktionieren soll. Man kann natürlich alle möglichen Elemente über so eine Top-Down-Liste oder so was, nur als Beispiel jetzt, irgendwie dann angeben. Ob das jetzt aber einfacher ist als so ein Autovervollständigen im Oxygen, oder so, das glaube ich nicht so richtig. Also ich habe da, wie gesagt, auch keine Lösung dafür. Ich glaube eher: Natürlich muss die GUI einigermaßen intuitiv sein, im Rahmen dessen was man kennt. Aber man kann auch die, man will ja gerade die Komplexität des Themas adäquat abbilden. Ja? Und Editionen sind ja ganz komplexe Sachen. Und wenn ich die adäquat abbilden will, dann muss man das ja eigentlich sehen, dass es ein Fortschritt ist, sowas jetzt in XML in TEI-Variante zu speichern, als das nur mit Word zu machen. Ich meine, das ist ja... , muss man eigentlich für einen Fachwissenschaftler... Ich glaube, das ist die Erkenntnis, die man haben muss. Dass das jetzt eigentlich... Dass man jetzt mehr sagen

kann, mehr festhalten kann als früher möglich war. Und jetzt muss ich nur noch irgendwie es schaffen, den Wunsch so stark zu machen, dass man da auch die spitzen Klammern in Kauf nimmt. Weil ich glaube, ich weiß nicht, ob das ein Trugschluss ist, wenn man sagt, man will alle spitzen Klammern verstecken, oder sowas. Also diese... Auch in Oxygen gibt es ja auch jetzt diesen Autormodus, oder sowas. Ich bin damit nicht glücklich. Also das ist... Und ich glaube auch nicht, dass man damit, dass es für die Leute einfacher ist, wenn man die Komplexität versteckt. Wir wollen ja gerade die Komplexität festhalten, dass, wenn sie mit textgenetischen Fragestellungen an die Sachen herangehen, dass dann... Ja.

**I9-7#I: Inwiefern messen sie dem Bedeutung zu, mittels dieser digitalen Möglichkeiten auch neue wissenschaftliche Erkenntnisse zu erlangen. Sie haben eben einmal angesprochen, was es für Möglichkeiten gibt. Also dass viele gar nicht mehr die konventionellen Möglichkeiten nutzen, sondern beispielsweise digital etwas viel schneller nachschlagen können, oder auch größere Datenmengen bearbeiten können, Muster erkennen usw. Inwiefern ist das aus ihrer Perspektive von Bedeutung, oder wird gemacht vielleicht schon, oder könnte gemacht werden?**

B: Also da ist jetzt wieder ein spezieller Fall in der Musikwissenschaft. Denn die Musikwissenschaft hat das besondere Problem, dass da der Notentext also eigentlich nicht verfügbar ist. Also man hat immer nur gedruckte Ausgaben. Das sind dann Bilder. Ja? Und man hat keinen Text in der digitalen Form. Es gibt zwar Notensatzprogramme, die sind aber alle proprietär und man hat da auch keine Möglichkeiten einer maschinellen Analyse, oder sowas. Es gibt bestimmte Formate, die das leisten und so, aber das sind alles... Ja. Es ist jedenfalls nicht vergleichbar mit der Germanistik oder Texten oder einer Volltextsuche im Internet, oder sowas. Sowas gibt es für die Musik nicht. Dass man über alle Musiktitel irgendetwas konnte. Das gibt es tatsächlich nicht. Das heißt, für uns ist es auch so, dass die ganzen Möglichkeiten, die die Korpuslinguistik oder sowas hat, die besitzen wir gar nicht. Die ganzen Methoden sind deshalb auch gar nicht entwickelt, weil wir die Möglichkeiten nicht haben. Das, denke ich, ist ein ganz ganz großes Desiderat und von daher erhoffe ich mir auch ganz viel natürlich. Dass ganz neue Fragestellungen, die über Korpora oder sowas, gehen, erarbeitet werden können. Dass man nicht immer nur noch exemplarisch arbeiten muss, sondern dass man wirklich auf einmal so Sachen über ein ganzes Jahrhundert oder sowas suchen kann. Das ist..., wo man vorher sich nur so auszugsweise sich selber etwas rauspicken konnte. Das ist... Ich...Das sind wirklich ungeahnte Möglichkeiten, die auch tatsächlich, denke ich, die Disziplin verändern werden. Natürlich.

**I9-8#I: Mit... Das sind dann auch Erwartungen, mit denen sie in diesen Workshop hinein**

**gegangen sind, also inwiefern TextGrid da eine Möglichkeit darstellt? Könnten sie die noch einmal etwas genauer beschreiben? Mit welchen Erwartungen, Interessen haben sie sich praktisch zu dem Workshop angemeldet, oder wie sind sie herangegangen?** B: Ja ich muss gestehen, dass mich am meisten, oder größtenteils die technischen Umsetzung oder so etwas am meisten interessiert hat. Denn es wurde ja lange angekündigt und man konnte ja zum ersten Mal etwas sehen, wie es funktioniert. Und das ist schon faszinierend. Also wie gesagt, der Gridgedanke dahinter mit den Repositorien mit Benutzerverwaltung und sowas, das ist unheimlich komplex auch wenn ich mir die Anmerkung erlauben darf, dass man mit dem XML-Editor..., dass man ... ja, das ist... da baut man etwas nach, was eigentlich schon irgendwie, was man auch anders haben könnte und das unheimlich zeitaufwendig ist. Aber dass man... ne, die dahinter stehende Gridarchitektur ist einfach wirklich faszinierend. Es ist auch faszinierend, dass ganz verschiedene Partner in das Boot geholt werden konnten. Also von Bibliotheken über Fachwissenschaftler und so, ist das super. Und für mich war jetzt einfach nur die Idee zu sehen: Was ist jetzt eben möglich tatsächlich? Was geht? Was für Services sind denn schon implementiert und so. Und was können wir davon nutzen?

I9-9#Und von daher war es ein bisschen schade, dass das mit der Integration von Bildern oder auch dieser Linkeditor noch nicht so weit war, weil wir eben sehr viel mit Bildern arbeiten, weil uns eben auch größtenteils der Text fehlt. Das war noch ein bisschen schade und die... Was war es noch?

I9-10#Und auf der anderen Seite solche Sachen, wie so Lemmatizer oder sowas, die für uns völlig irrelevant sind. Für Musikwissenschaftler. Aber das ist meine spezielle Anforderung als Musikwissenschaftler eben.

**I9-11#I: Ja, das ist für uns aber auch interessant. Also ich würde gerne erfahren, was für sie eben noch nützlich wäre beziehungsweise was von daher auch gefehlt hat im derzeitigen Lab. Beziehungsweise auch wo sie Chancen sehen und was sie gut gebrauchen könnten von dem was es bisher gibt.** B: Ja. Also für uns ist wie gesagt ganz ganz zentral... Also ich sage jetzt für uns, ich meine für mich ganz zentral diese, die Möglichkeit, die Gridarchitektur nutzen zu können, weil man jetzt ja immer in diesen vereinzelt Projekten das Problem hat der Archivierung, der Langzeitverfügbarkeit, der persistenten Identifizierung, der Verlinkung mit anderen Sachen, dann die Benutzerverwaltung und so weiter. Das sind ja Probleme, die jedes Projekt selber wieder hat. Wenn man das einmal gelöst hätte und dann eben wieder noch eine Anzeige der Ergebnisse oder so was. Wenn man diese Sachen einmal zentral gelöst hat, dann

können tatsächlich die Fachwissenschaftler hergehen und sagen: Ich arbeite jetzt an einer bestimmten Stelle. Ich brauche mich um gar nichts zu kümmern. Ich schmeiße das da rein und krieg's auch wieder raus und sowas. Und wenn das eben verfügbar ist, dann wäre schon ein Großteil erledigt. Und dann tatsächlich bestimmte Services zu programmieren und sowas. Das kann man ja dann später machen je nach Anforderung. Aber einfach dass man mal Framework hat, mit dem man arbeiten kann, ohne sich Gedanken zu machen: Ja wie kann ich das wieder darstellen? Und wo wird das dann angezeigt? Oder wo kann ich das speichern? Oder wo liegt das in zehn Jahren? Dass diese ganzen Sachen einfach erstmal geregelt sind und man sich darum nicht den Kopf zerbrechen muss. Das ist für mich so die Killerfunktion.

**I9-12#I: Aber dann mit der Möglichkeit, das anzupassen an verschiedene Disziplinen jetzt aus Sicht der Musikwissenschaften, die ja bisher unter den Testern eher einen Exoten darstellen, ist das ja wahrscheinlich ein entscheidender Punkt. Also dass da Tools auch angeschlossen werden können zum Beispiel, die musikwissenschaftlich relevant sind.** B: Ja, genau. Aber das erwarten wir ja nicht, dass das schon gemacht wird oder so, dass das schon da wäre. Das kann man ja selber dann entwickeln. Ich denke, das ist auch wieder so eine Community-Idee eben, dass man das dann machen kann. Aber das man einfach mal die Architektur hat, mit der man arbeiten kann, denn die gibt es ja tatsächlich noch überhaupt nicht. Also in unserem Bereich gibt es diverse Editionsinstitute. Da macht jeder seinen eigenen Senf und das kommt dann am Ende nicht zusammen. Also... Und wenn man das einmal vereinheitlicht hätte, das wäre wirklich extrem nützlich. Ja.

**I9-13#I: Mal angenommen dieses Netzwerk besteht dann irgendwann. Also als Vernetzung von Inhalten, aber auch von Arbeitsprozessen. So auf diese beiden Dinge kann man so vereinfacht ausgedrückt einmal reduzieren. Wenn diese Infrastruktur besteht, dann bringt das ja die Gefahr auch mit sich, dass man sich in so einem Netzwerk nicht zurechtfindet, oder verheddert. Was wäre da für sie entscheidend?** B: Ja... Ich weiß nicht, ob das mit dem... Also verheddern? Das verstehe ich jetzt nicht. Also für mich ist das einfach erstmal ein Riesenfundus an Möglichkeiten, seien es jetzt Daten oder Services, oder wie auch immer. Natürlich muss ich mich da irgendwie zurechtfinden. Und ja. Dafür gibt es dann Suchmöglichkeiten. Hoffentlich. Was man darüber hinaus noch machen könnte, um das irgendwie zu strukturieren, oder sowas. Darüber habe ich mir ehrlich gesagt überhaupt keine Gedanken gemacht. Das ist wahrscheinlich die Frage. **I: Ja. Sie hatten ja eben gesagt, zunächst einmal wäre es für sie wichtig projektintern sich vernetzen zu können und als zweiter**

**Schritt dann auch die Vernetzung von verschiedenen Projekten beziehungsweise disziplinübergreifend und dann wird es ja irgendwann kompliziert. Das heißt man muss ja irgendwo sehen: Was gibt es? Beziehungsweise selber sichtbar sein für andere. Wenn diese Verknüpfung zustande kommen soll. Den Punkt meine ich jetzt.** B: Ja, aber ich gehe davon aus, ich kann meine Daten einfach speichern und ich kann sie verlinken. Was weiß ich? Ganz normale X-Links zu anderen Dokumenten oder sowas, die, was weiß ich, nicht mehr von mir selber sein müssen, sondern von jemand anders. Dass die... Also dass man die Möglichkeit hat, einfach sich zu beziehen auf andere Dokumente über bestimmte Links, oder wie auch immer. Und die Sichtbarkeit, also es wird ja, denke ich, alles auf einer Ebene stattfinden. Also ich meine man ist ja nicht sichtbar und unsichtbar, sondern es ist natürlich nach Benutzergruppen vielleicht irgendwie geordnet. Dass man die Möglichkeit hat, das nicht alles für jeden sichtbar ist, sondern nur für eine bestimmte abgeschlossene Benutzergruppe und sowas. Also diese Möglichkeiten sind ja aber schon vorhanden – denke ich eher. Also dass man eben... Obwohl? Ich glaube eine Gruppenverwaltung gibt es bis jetzt noch nicht so, nur Einzelbenutzer oder sowas. Aber so etwas ist ja technisch nicht das Problem, dass man noch irgendwie Gruppen dazufügt für bestimmte Editionsprojekte und dann diesen Leuten mehr Rechte einräumt als anderen. Aber letztendlich ist es ja auch, ja, denke ich, auch nur ein Hilfsmittel bis die Leute das angenommen haben, dass sie sagen können, sie verstecken ihre Sachen. Weil eigentlich, denke ich, ist der Sinn ja, dass tatsächlich die Sachen verfügbar sind, in welcher Form sie auch immer sind. Man muss natürlich eine Versionierung haben, die Sagen kann der Stand ist stabil und der nicht. Und dieser Stand ist überarbeitet und dieser ist noch roh, oder so etwas. Sowas muss man natürlich bereithalten, aber eigentlich sollte der Sinn ja schon sein, dass die Sachen für alle verfügbar sind, in welchem Stadium auch immer. Von daher ist so eine Benutzerverwaltung eigentlich nur vielleicht eine unnötige Einschränkung, die man vielleicht am Ende wieder abschaffen kann. Aber das ist eine andere Geschichte. Ja.

**I9-14#I: Ja ich wollte jetzt auch ungefähr nur einmal wissen, wie sie sich dieses Netzwerk vorstellen, in dem dann gearbeitet werden könnte. Was für mich jetzt noch interessant wäre, da sie ja sehr viel mit Bildern arbeiten. Wäre dann für sie von Bedeutung inwiefern die ganze Struktur zwischen den Daten sichtbar ist? Also eine Art Visualisierung?** B: Der Struktur? Der Beziehungen? Ja, das wäre super. Also, ob ich... Aber ich glaube, dass ist auch ein Riesenproblem irgendwie. Die Visualisierung von solchen Beziehungen, die über reine Links oder sowas hinausgehen. Also, das ist... Das Problem braucht... Wir haben keine Lösung dafür,



wie man tatsächlich solche netzartigen Verbindungen dann ansprechend visualisieren kann. Ja? Das wäre super. Ja. **I: Inwiefern spielt das in der Musikwissenschaft eine Rolle, oder in ihrer Arbeit? Wenn sie sagen: Wir haben noch keine Lösung gefunden, aber das gibt es schon, oder es besteht Interesse daran?** B: Naja. Man stellt ja irgendwie... Also wenn ich jetzt nur einmal unsere W-Gesamtausgabe nehme. Dann werden da... Es ist noch ein Editionsprojekt der alten Schule, sagen wir einmal. Man hat eben den ganzen Werk- beziehungsweise personenzentrierten Zugang. Man hat also die Briefe von W und angenommen, man hat sein Tagebuch, man hat seine Schriften. Man hat seine Werke. Man hat seine... Fehlt mir etwas? Ich weiß nicht. Also man hat verschiedene Kategorien oder Komponenten seines Schaffens, die man jetzt einzeln herausgibt. Aber wenn man sich eben damit beschäftigt, dann stellt man fest, dass diese Sachen unheimlich miteinander verwoben sind. Also im Tagebuch gibt es Bezüge, auch die Briefe. Und in Briefen werden Werke erwähnt. Und in den Werken gibt es dann eben Personen, die dann wieder in seinen Schriften auftreten und so weiter und so fort. Also es ist unheimlich vernetzt. Man kann halt natürlich gerne diese Bezüge herstellen. Und im besten Fall so eine Knowledge-Representation, also so eine Art Ontologie oder sowas, wäre letztendlich vielleicht dieses Großziel, das man haben könnte. Dass man da wirklich dann versucht, das Wissen zu repräsentieren und als Belege tatsächlich die einzelnen Dokumente nimmt. Von oder über W. Und... von daher... es ist... ist es ja eben auch im... Also früher, wenn man von gedruckten Ausgaben ausgeht, dann ist, sage ich mal, die Zahl der Fußnoten oder der Verweise begrenzt und man kann auch schlecht zu irgendwie Bildern, dann auch blöde Referenzen irgendwie Seite, Takt 5 im Adagio oder sowas. Das ist nicht so schön, als wenn man tatsächlich einen Link anlegen kann und man sieht dann das Bild und sowas. Ne? Und man kann Bezüge von Bild zu Bild, von Text zu Bild, von Bild zu Text, oder Text zu Text. Also man kann zahlreiche Arten der Verweise haben, aber man hat auch einfach viel viel mehr. Und jetzt ist natürlich, wenn man nur in Kategorien denkt von wegen normale Links oder sowas, dann ist das noch nicht viel. Aber wenn man im Bereich so Ontologien denkt, dass man, sage ich mal, diese Beziehungen auch bewerten kann oder sowas. Das dann wieder visualisieren... Das wäre optimal. Aber das ist, denke ich, auch nichts musikwissenschaftlich Spezielles oder so. Aber das ist, was alle haben.

I9-15#Und bei uns ist es jetzt eben so, dass wir tatsächlich fast, ich würde sagen, der einzige Unterschied ist, dass der Notensatz, so wie wir ihn kennen. Also diese Common Lisp Music Notation ist eben nicht nur so eindimensional in so einer Sequenzform wie man Text schreibt von links nach rechts, sondern man hat immer zwei Ebenen. Also einmal die Melodielinie und dann

aber auch noch die Harmonie dazu. Das heißt, man kann das auch nicht einfach in so ein XML auflösen, in so... Also man hat immer... Das ist nicht so ganz einfach, aber es geht. Nur wiederum lässt sich in XML Notentext ganz schlecht lesen vom Menschen. Wir hatten... Im Oxygen kann ich auch meine Note noch lesen. Das funktioniert noch einigermaßen, aber Beethoven kann man da nicht mehr lesen. Ja? Von daher braucht man auch immer auch diese spezielle Visualisierung dann auch in dieser Notenform. Aber das hoffen wir auch, dass man das irgendwann herstellen kann, dass das dann auch on the fly dann geht. Dass man sagt: Gib mir Takt fünf, und er zeigt dir Takt fünf. Und... Ja. Das ist eigentlich die einzige Besonderheit, die man hat. Bis man dieses on the fly – generieren hat, braucht man eben diese Bilder dazu. Aber das ist eigentlich auch nichts anderes, als wenn man die Faksimiles der... von irgendwelchen Briefen von Heine hat, oder so. Das möchte man inzwischen auch alles dazu anzeigen. Ist ja auch ein Phänomen der neuen digitalen Ausgaben, dass man eigentlich jetzt immer alles mit Bildern belegt. Also da kommen Faksimile-Sachen dazu. Und ja... Und das ist in der Musikwissenschaft die Ausnahme, dass wir die Notenzulage dazulegen wollen.

**I9-16#I: Und da sehen sie dann auch Potentiale auch neue wissenschaftliche Erkenntnisse zu gewinnen? Dadurch dass man so arbeiten kann? Also mit Hilfe einer Ontologie oder visualisierten Bezügen? Oder wie sehen sie das?** B: Ja, ich hoffe, dass man eben tatsächlich die... Was heißt hoffen? Also es ist vielleicht so die Vorstellung, dass man versucht, den Computer nicht nur als Speichermedium von den... Also von irgendwelchen Texten so à la Projekt Gutenberg oder sowas zu haben, sondern tatsächlich auch irgendwie von Wissen. Was auch immer das jetzt heißen soll. Aber dass man die Sachen, sage ich mal, immer mehr anreichert, auch immer mehr die Bezüge zahlreicher macht. Und dass dann eben im besten Falle auch wieder Wissen generiert werden kann auf maschinelle Art und Weise. Wie das genau aussehen soll, davon habe ich auch keine Vorstellung. Aber es ist so das, was schon im Schwange ist und man wird halt sehen, wenn dann die ersten Projekte dann soweit sind – was dann dabei rauskommt. Ja?

**I9-17#I: Gut. Dann möchte ich zum Abschluss noch einmal konkret auf das TextGrid-Lab eingehen. Und zwar würde mich interessieren, wie einfach ihr Gesamteindruck war? Was ist ihnen positiv jetzt noch so in Erinnerung geblieben und was negativ? Das Beste und das Schlechteste.** B: Das Beste und das Schlechteste. Also wie gesagt das Beste finde ich die Architektur, die Infrastruktur. Die ist natürlich nicht direkt sichtbar in der Oberfläche. Aber ich muss sagen, dass, von so ein paar Patzern abgesehen, hat auch die Client-Service-Verbindung

eigentlich immer sehr gut funktioniert. Da gab es eigentlich, glaube ich, kaum Probleme. Auch die Anmeldung der Nutzer oder sowas. Das hat alles funktioniert. Sicherlich hakt es da noch an manchen Ecken. Aber als Demonstration, als proof of concept, fand ich das sehr gut.

I9-18#Grundsätzlich ist die GUI noch ein... , was die Usability jetzt angeht, ist es natürlich noch nicht besonders ansprechend. Und... Ich glaube auch tatsächlich, die Suchmöglichkeiten waren noch nicht so ausgereift. Da waren Sachen nicht... Da war irgendetwas noch nicht... Da suchte er noch nicht über alle Repositorien oder irgendsowas. Ich bin... Das hat alles noch nicht so funktioniert. Also man hatte das Gefühl, es war im frühen Beta-Stadium alles. Und so. Dass man einfach noch Zeit braucht. **I: Also in Sachen wie Navigation, Bedienbarkeit und Erlernbarkeit wären noch zu verbessern.** B: Ja. Also es geht schon mit diesen Startbild los, wo man sich irgendwie erst einloggen muss, aber auch ohne Einloggen schon weiterkommt. Und so. Oder bestimmte Abfragen, glaube ich, zum Anlegen eines neuen Projektes, wo man dann gleich auch die Benutzer dazufügen kann. Also es war noch nicht so ganz stringent immer alles. Aber das sind Sachen, die sich, glaube ich, ausmerzen lassen. Das ist, glaube ich, gar nicht so dramatisch.

I9-19#Ich glaube das größere Problem, ist wahrscheinlich wirklich... Ich weiß nicht, ob Herr V, der das macht, aber nicht gerne hört. Aber ich glaube der XML-Editor. Ich glaube da halst man sich zuviel Arbeit auf. Das könnte man, glaube ich, besser als Plug-In irgendwie einbinden, oder sowas. Dann hätte man da, glaube ich, eine große Sorge weniger und hätte bessere Ergebnisse in kürzerer Zeit. Aber das sind natürlich Design-Entscheidungen, die jetzt schwer noch zu treffen sind. Ja.

I9-20#Die Eclipse-Plattform ist für einen Laien auch nicht besonders ansprechend. Also ich muss sagen selbst für mich, finde ich das... **I: Haben sie schon einmal mit Eclipse gearbeitet?** B: Jein. Nicht ernsthaft. Ne. Und ich finde es eben auch noch... Diese Aufteilung der Fenster mit Reitern und so weiter. Und Editor und View und so was. Das ist irgendwie alles so ein bisschen ... Ich weiß nicht, ob das den geisteswissenschaftlichen Anforderungen gerecht ist. Also da würde ich wirklich fast sagen, das ist eine Sache, die tatsächlich die Programmierer benutzen. **I: Ja. Das ist Informatiker...** B: Ja. Ich habe ja selber gesagt: Man darf zum Beispiel die spitzen Klammern nicht verstecken. Oder so was. Also ich will gar nicht... Die sollen nicht so wirklich bunt, so „what you see is what you get“ oder so was. Darum geht es gar nicht. Aber ich glaube man... Aber die Unterteilung auch in Projekte oder so was. Ich weiß nicht, ob das den Sachen so entgegenkommt, wie man gewohnt ist zu arbeiten. Da bin ich mir jetzt nicht ganz sicher, ob das

das Richtige ist.

**I9-21#I: Ja, das sind eben noch... Das steckt noch viel Potenzial drin. Ja. Ja dann noch eine abschließende Frage. TextGrid wird ja als eHumanities-Projekt bezeichnet. Was verbinden sie mit diesem Begriff? Welche Potenziale sehen sie da aus ihrer Perspektive? Was ist da für sie relevant?** B: eHumanities? Für mich ist relevant eigentlich die Verfügbarkeit der Daten. Sowohl eben der Primärdaten, weiß nicht, der Bilder, der Transkription als auch der Edition. Aber eben auch die maschinelle Verarbeitung dessen. Also bestimmte Methoden, die dann eingesetzt werden können, eben nicht nur statistischer Art. Aber ... also die maschinelle Verarbeitung von philologischen Daten, oder so was. Dass ... und was für mich interessanterweise groß mit reinspielt: Für mich ist der... Bei eHumanities ist die ganz große Aussicht, meiner Ansicht nach, dass die Disziplinen wieder viel stärker zusammenkommen. Also das, was doch sehr lange nebeneinander stand, so was doch jetzt irgendwie... , jedenfalls ist mein Eindruck, auf diesen ganzen TextGrid-Tagungen zum Beispiel sind doch sehr viel verschiedene Fachvertreter zum Beispiel: Musikwissenschaftler, Germanisten, Historiker oder so was, die auf einmal alle wieder an einem Tisch sitzen und an einem Strang ziehen. Das ist, glaube ich, ein ganz großer, wie soll ich sagen, ... es wird jetzt ermöglicht durch die eHumanities, dass da eben alle vor denselben Problemen stehen. Ja. Aber... Das ist so im ganz Groben meine Wolke zu eHumanities. **I: OK. Gut. Vielen Dank.** B: Alles klar.
